# Supplementary material for: Mitochondrial-encoded complex I impairment induces a targetable dependency on aerobic fermentation in Hürthle cell carcinoma of the thyroid
Source: bioRxiv preprint, doi:10.1101/2022.08.16.504162, version 1 (2022-08-17)
Supplement: Table S3 [file 504162_file04.xlsx]

## Sheet: Information
MaGECK analysis output of individual screening conditions is divided by sheet
Column title legends
id	Gene ID
neg|score	MaGECK depletion score
neg|p-value	MaGECK depletion t.test p-value
neg|fdr	MaGECK depletion fdr q-value
neg|rank	MaGECK depletion rank
neg|goodsgrna	MaGECK depletion # of sgRNAs scoring
neg|lfc	MaGECK gene log2 fold-change (median of log2 fold-change for gene targeting sgRNAs)
neg lfc rank	Ranking based on gene log2 fold-change (1 = most depleted; 19,114 = most enriched)
pos|score	MaGECK enrichment score
pos|p-value	MaGECK enrichment t.test p-value
pos|fdr	MaGECK enrichment fdr q-value
pos|rank	MaGECK enrichment rank
pos|goodsgrna	MaGECK enrichment # of sgRNAs scoring

## Sheet: NCI-237 Genome-Wide
id	neg|score	neg|p-value	neg|fdr	neg|rank	neg|goodsgrna	neg|lfc	neg lfc rank	pos|score	pos|p-value	pos|fdr	pos|rank	pos|goodsgrna
LOC100507462	1.045e-05	2.5898e-07	4e-06	232	4	-5.3922	1	0.99999	1	1	18909	0
RPS27	2.8514e-05	2.5898e-07	4e-06	363	4	-4.8228	2	0.99995	1	1	18712	0
RPS13	1.8687e-05	2.5898e-07	4e-06	305	4	-4.7216	3	0.99998	1	1	18842	0
HSPE1	1.4993e-06	2.5898e-07	4e-06	93	4	-4.5556	4	1	1	1	19034	0
WDR77	1.0416e-05	2.5898e-07	4e-06	231	3	-4.49	5	0.76354	0.97047	1	13338	0
NOL10	2.1621e-06	2.5898e-07	4e-06	115	4	-4.3398	6	0.99986	1	1	18584	0
VPS25	9.1755e-07	2.5898e-07	4e-06	70	4	-4.1402	7	1	1	1	19053	0
SNRPF	1.5033e-05	2.5898e-07	4e-06	274	4	-4.0559	8	0.99998	1	1	18867	0
FAU	4.1033e-10	2.5898e-07	4e-06	1	4	-4.0485	9	1	1	1	19114	0
FBL	3.1712e-07	2.5898e-07	4e-06	47	4	-4.0139	10	1	1	1	19074	0
TERF2	4.6493e-08	2.5898e-07	4e-06	16	3	-3.9957	11	0.87498	0.99322	1	15369	0
RPS9	1.4516e-05	2.5898e-07	4e-06	270	4	-3.9931	12	0.99999	1	1	18871	0
RPS8	3.3452e-06	2.5898e-07	4e-06	144	4	-3.9883	13	1	1	1	18988	0
RPL24	1.2781e-06	2.5898e-07	4e-06	86	4	-3.9682	14	1	1	1	19040	0
POLR3H	1.4404e-06	2.5898e-07	4e-06	90	4	-3.9617	15	1	1	1	19036	0
BUB3	2.9119e-08	2.5898e-07	4e-06	10	4	-3.9603	16	1	1	1	19107	0
EIF2S3	9.0287e-06	2.5898e-07	4e-06	216	4	-3.9582	17	0.99999	1	1	18921	0
UBA1	2.2459e-05	2.5898e-07	4e-06	325	4	-3.9229	18	0.99998	1	1	18823	0
CCDC84	1.1608e-06	2.5898e-07	4e-06	83	4	-3.8449	19	1	1	1	18992	0
FAM96B	1.2739e-05	2.5898e-07	4e-06	260	4	-3.8169	20	0.99999	1	1	18881	0
RPP21	5.3079e-10	2.5898e-07	4e-06	2	4	-3.8151	21	1	1	1	19109	0
TBCC	1.8358e-05	2.5898e-07	4e-06	301	4	-3.7992	22	0.99998	1	1	18846	0
PSMG3	4.6736e-08	2.5898e-07	4e-06	17	4	-3.7802	23	1	1	1	19101	0
RPL27	1.0709e-05	2.5898e-07	4e-06	234	4	-3.7454	24	0.99999	1	1	18908	0
HSPA5	6.8062e-10	2.5898e-07	4e-06	3	4	-3.7281	25	1	1	1	19113	0
RPS6	4.6231e-06	2.5898e-07	4e-06	168	4	-3.7015	26	1	1	1	18965	0
VARS	6.7689e-06	2.5898e-07	4e-06	196	4	-3.6945	27	0.99984	1	1	18557	0
SBDS	2.0029e-09	2.5898e-07	4e-06	4	4	-3.6868	28	0.99996	1	1	18758	0
XPO1	2.508e-05	2.5898e-07	4e-06	342	4	-3.6466	29	0.9896	0.99994	1	17768	0
RPL27A	1.6681e-05	2.5898e-07	4e-06	291	4	-3.6339	30	0.99998	1	1	18854	0
ARMC7	9.3606e-07	2.5898e-07	4e-06	73	4	-3.6176	31	1	1	1	19051	0
NOP16	1.7388e-07	2.5898e-07	4e-06	39	4	-3.6141	32	1	1	1	19070	0
RUVBL1	7.4361e-06	2.5898e-07	4e-06	206	4	-3.6097	33	0.99999	1	1	18931	0
POLR2L	1.4598e-06	2.5898e-07	4e-06	91	4	-3.5746	34	1	1	1	19035	0
TUBB	4.0798e-06	2.5898e-07	4e-06	161	4	-3.5693	35	1	1	1	18971	0
RAD9A	2.4561e-05	2.5898e-07	4e-06	339	4	-3.5623	36	0.99982	1	1	18536	0
GPN2	2.3098e-05	2.5898e-07	4e-06	330	4	-3.5618	37	0.99998	1	1	18819	0
EEF1A1	2.9581e-05	2.5898e-07	4e-06	368	4	-3.5291	38	0.99997	1	1	18791	0
RPL11	4.7349e-06	2.5898e-07	4e-06	171	4	-3.5261	39	1	1	1	18962	0
TUBGCP2	0.00026866	2.5898e-07	4e-06	745	3	-3.5248	40	0.81294	0.98138	1	14211	0
PSMB4	5.2753e-08	2.5898e-07	4e-06	19	4	-3.4928	41	1	1	1	19099	0
SRSF1	1.8821e-06	2.5898e-07	4e-06	103	4	-3.4649	42	1	1	1	19024	0
ATP1A1	4.134e-06	2.5898e-07	4e-06	162	4	-3.4634	43	1	1	1	18970	0
SOD1	1.4528e-05	2.5898e-07	4e-06	271	4	-3.4589	44	0.99999	1	1	18870	0
SRSF2	0.00024025	2.5898e-07	4e-06	724	3	-3.4236	45	0.80092	0.97972	1	13982	0
SOD2	2.2502e-06	2.5898e-07	4e-06	117	4	-3.4219	46	1	1	1	19012	0
MARS	3.5709e-06	2.5898e-07	4e-06	153	4	-3.406	47	1	1	1	18979	0
TRMT112	8.9867e-06	2.5898e-07	4e-06	215	4	-3.4016	48	0.99993	1	1	18676	0
RPL5	3.2992e-05	2.5898e-07	4e-06	385	3	-3.4008	49	0.45516	0.79674	1	8050	0
ATP6V1B2	5.9863e-05	2.5898e-07	4e-06	476	4	-3.3856	50	0.99994	1	1	18701	0
RPL8	3.259e-05	2.5898e-07	4e-06	384	4	-3.3582	51	0.99997	1	1	18777	0
SUPT4H1	0.00016907	2.5898e-07	4e-06	661	4	-3.3577	52	0.99983	1	1	18542	0
PSMB7	3.7571e-05	2.5898e-07	4e-06	399	4	-3.3492	53	0.99912	1	1	18311	0
PPP6C	8.5289e-06	2.5898e-07	4e-06	211	4	-3.344	54	0.99999	1	1	18926	0
TXN	1.613e-06	2.5898e-07	4e-06	96	4	-3.3205	55	1	1	1	19031	0
TOP2A	5.557e-06	2.5898e-07	4e-06	183	4	-3.3173	56	0.99999	1	1	18951	0
RAN	0.00013396	2.5898e-07	4e-06	611	3	-3.2985	57	0.2488	0.52153	1	4449	1
SS18L2	2.6354e-05	2.5898e-07	4e-06	349	4	-3.2929	58	0.96564	0.99948	1	17114	0
MYC	2.0432e-06	2.5898e-07	4e-06	110	4	-3.2857	59	1	1	1	19017	0
C14orf80	8.6389e-08	2.5898e-07	4e-06	31	4	-3.284	60	1	1	1	19088	0
LOC100144595	0.0072169	2.0978e-05	0.000228	1755	4	-3.282	61	0.98376	0.99986	1	17599	0
PLK1	5.5985e-05	2.5898e-07	4e-06	463	4	-3.2798	62	0.99985	1	1	18562	0
CCT6A	3.1981e-06	2.5898e-07	4e-06	141	4	-3.2776	63	1	1	1	18990	0
TPI1	1.469e-06	2.5898e-07	4e-06	92	4	-3.2623	64	0.99999	1	1	18949	0
RPL23A	1.5184e-07	2.5898e-07	4e-06	37	4	-3.26	65	1	1	1	19082	0
NIP7	9.4542e-07	2.5898e-07	4e-06	74	4	-3.2592	66	1	1	1	19050	0
ALDOA	4.1104e-09	2.5898e-07	4e-06	6	4	-3.2582	67	1	1	1	19112	0
VHL	5.0235e-05	2.5898e-07	4e-06	448	3	-3.2573	68	0.9292	0.99801	1	16352	0
RPE	1.3836e-05	2.5898e-07	4e-06	266	4	-3.2443	69	0.99999	1	1	18874	0
PRPF19	8.3054e-08	2.5898e-07	4e-06	30	4	-3.2315	70	1	1	1	19089	0
GMPPB	0.00013515	2.5898e-07	4e-06	612	4	-3.2204	71	0.99976	1	1	18499	0
RPS20	9.9375e-06	2.5898e-07	4e-06	226	4	-3.2184	72	0.99999	1	1	18912	0
RPL17-C18orf32	5.7203e-08	2.5898e-07	4e-06	22	4	-3.2155	73	1	1	1	19096	0
PCNA	0.00019721	2.5898e-07	4e-06	689	4	-3.2123	74	0.9998	1	1	18522	0
LSM7	1.3979e-06	2.5898e-07	4e-06	89	4	-3.2116	75	1	1	1	19037	0
KPNB1	1.197e-05	2.5898e-07	4e-06	251	4	-3.2044	76	0.99999	1	1	18890	0
RPL31	5.8165e-08	2.5898e-07	4e-06	23	4	-3.1895	77	1	1	1	19095	0
IGBP1	4.727e-06	2.5898e-07	4e-06	170	4	-3.1888	78	1	1	1	18963	0
PSMA6	1.2428e-05	2.5898e-07	4e-06	258	4	-3.1842	79	0.99999	1	1	18883	0
RPS11	1.4958e-05	2.5898e-07	4e-06	273	4	-3.1733	80	0.99999	1	1	18868	0
DBR1	7.9507e-05	2.5898e-07	4e-06	520	4	-3.1728	81	0.99663	1	1	18082	0
RPL12	0.0001432	2.5898e-07	4e-06	627	4	-3.1661	82	0.99986	1	1	18572	0
RPL13	1.8345e-07	2.5898e-07	4e-06	41	4	-3.1594	83	1	1	1	19079	0
SNRPD3	3.6425e-05	2.5898e-07	4e-06	395	4	-3.1514	84	0.99996	1	1	18766	0
TIMELESS	2.2124e-05	2.5898e-07	4e-06	324	4	-3.1505	85	0.99998	1	1	18824	0
GNB2L1	2.5773e-06	2.5898e-07	4e-06	126	4	-3.1501	86	1	1	1	19005	0
RPLP2	6.6256e-06	2.5898e-07	4e-06	194	4	-3.1426	87	0.99999	1	1	18941	0
LSM2	4.2075e-06	2.5898e-07	4e-06	163	4	-3.1418	88	0.99999	1	1	18958	0
GINS2	6.4817e-08	2.5898e-07	4e-06	26	4	-3.1372	89	1	1	1	19093	0
PRMT1	3.6658e-07	2.5898e-07	4e-06	48	4	-3.1338	90	1	1	1	19069	0
DAD1	0.00015002	2.5898e-07	4e-06	634	4	-3.126	91	0.99985	1	1	18566	0
RPS24	0.00028763	2.5898e-07	4e-06	759	4	-3.1217	92	0.99965	1	1	18450	0
TAF6	8.271e-06	2.5898e-07	4e-06	210	4	-3.1148	93	0.99999	1	1	18927	0
URB2	0.00021304	2.5898e-07	4e-06	703	4	-3.1122	94	0.97399	0.99966	1	17311	0
VCP	3.4123e-06	2.5898e-07	4e-06	149	4	-3.1077	95	1	1	1	18983	0
DDX20	3.4888e-06	2.5898e-07	4e-06	151	4	-3.1072	96	1	1	1	18981	0
TIMM10	1.5322e-05	2.5898e-07	4e-06	277	4	-3.1069	97	0.99998	1	1	18864	0
RPS26	0.00016154	2.5898e-07	4e-06	654	3	-3.1019	98	0.020504	0.14568	1	797	1
RPS16	2.5459e-06	2.5898e-07	4e-06	123	4	-3.0997	99	1	1	1	18966	0
ALG2	0.00022724	2.5898e-07	4e-06	715	4	-3.0978	100	0.99935	1	1	18357	0
RPL17	3.4021e-06	2.5898e-07	4e-06	148	4	-3.0973	101	1	1	1	18984	0
CDC7	0.00053853	2.5898e-07	4e-06	913	4	-3.0953	102	0.99859	1	1	18244	0
DPAGT1	2.8788e-06	2.5898e-07	4e-06	133	4	-3.0914	103	1	1	1	18998	0
HSPD1	9.9018e-05	2.5898e-07	4e-06	562	4	-3.0891	104	0.99951	1	1	18408	0
BUD31	2.3915e-06	2.5898e-07	4e-06	121	4	-3.0862	105	1	1	1	19008	0
ORAOV1	7.0857e-06	2.5898e-07	4e-06	200	4	-3.0848	106	0.99999	1	1	18936	0
RPLP0	4.3693e-08	2.5898e-07	4e-06	13	4	-3.0844	107	1	1	1	19104	0
ERCC3	7.745e-05	2.5898e-07	4e-06	512	4	-3.0676	108	0.99659	1	1	18079	0
POLR2J	0.00040794	2.5898e-07	4e-06	839	4	-3.0628	109	0.99959	1	1	18431	0
TUT1	1.583e-07	2.5898e-07	4e-06	38	4	-3.0618	110	1	1	1	19081	0
GAPDH	9.0987e-05	2.5898e-07	4e-06	545	4	-3.0523	111	0.99991	1	1	18638	0
CCS	5.439e-08	2.5898e-07	4e-06	20	4	-3.0491	112	1	1	1	19098	0
EXOSC8	4.9081e-07	2.5898e-07	4e-06	56	4	-3.0457	113	1	1	1	19064	0
HSCB	0.00011199	2.5898e-07	4e-06	579	4	-3.0434	114	0.99683	1	1	18097	0
NBPF15	4.0642e-05	2.5898e-07	4e-06	412	4	-3.036	115	0.99996	1	1	18749	0
PKMYT1	2.9979e-06	2.5898e-07	4e-06	136	4	-3.0301	116	1	1	1	18996	0
PAFAH1B1	5.8833e-07	2.5898e-07	4e-06	62	4	-3.0299	117	1	1	1	19060	0
PHB2	2.0036e-05	2.5898e-07	4e-06	315	4	-3.0173	118	0.99998	1	1	18833	0
ATP6V0B	3.0598e-06	2.5898e-07	4e-06	138	4	-3.0166	119	1	1	1	18994	0
PRPF8	8.1294e-05	2.5898e-07	4e-06	528	4	-3.0112	120	0.99992	1	1	18651	0
DCTN5	1.3256e-07	2.5898e-07	4e-06	35	4	-3.0064	121	1	1	1	19084	0
PGAM1	3.017e-09	2.5898e-07	4e-06	5	4	-3.003	122	0.99731	1	1	18132	0
HAUS5	8.7837e-07	2.5898e-07	4e-06	67	4	-2.9925	123	1	1	1	19055	0
EIF3I	1.4208e-05	2.5898e-07	4e-06	269	3	-2.9796	124	0.66175	0.93126	1	11642	0
PFDN2	2.0857e-06	2.5898e-07	4e-06	113	4	-2.9788	125	0.99998	1	1	18841	0
RPL18	2.4596e-05	2.5898e-07	4e-06	340	4	-2.9692	126	0.99998	1	1	18811	0
ATP6V0C	5.8523e-08	2.5898e-07	4e-06	24	4	-2.9669	127	1	1	1	18972	0
RPL34	0.00040761	2.5898e-07	4e-06	838	4	-2.9638	128	0.999	1	1	18296	0
SNRPD1	5.2621e-07	2.5898e-07	4e-06	60	4	-2.962	129	1	1	1	19061	0
POLR3K	2.8911e-07	2.5898e-07	4e-06	46	4	-2.957	130	1	1	1	19075	0
WDR1	1.3965e-05	2.5898e-07	4e-06	267	4	-2.9551	131	0.99999	1	1	18873	0
NAT10	5.3532e-05	2.5898e-07	4e-06	460	3	-2.9529	132	0.52695	0.85074	1	9280	0
DHPS	0.00023048	2.5898e-07	4e-06	717	4	-2.9499	133	0.99878	1	1	18266	0
EPRS	6.8816e-05	2.5898e-07	4e-06	494	4	-2.9457	134	0.99993	1	1	18684	0
SCAP	8.8197e-07	2.5898e-07	4e-06	69	4	-2.9327	135	1	1	1	19015	0
LUC7L3	8.255e-08	2.5898e-07	4e-06	29	4	-2.928	136	1	1	1	19090	0
PHF5A	0.00019283	2.5898e-07	4e-06	685	3	-2.9177	137	0.31482	0.63037	1	5566	0
PPP1R11	4.4642e-07	2.5898e-07	4e-06	53	4	-2.9126	138	1	1	1	19067	0
EIF3B	5.3445e-05	2.5898e-07	4e-06	459	3	-2.9115	139	0.52267	0.84794	1	9202	0
PSMA5	2.3813e-07	2.5898e-07	4e-06	45	4	-2.8988	140	1	1	1	19076	0
RPS15A	1.7999e-05	2.5898e-07	4e-06	299	4	-2.8986	141	0.99998	1	1	18848	0
CENPM	3.962e-05	2.5898e-07	4e-06	408	4	-2.8925	142	0.99995	1	1	18736	0
ANAPC1	1.0257e-05	2.5898e-07	4e-06	229	3	-2.8919	143	0.9008	0.99605	1	15824	0
TICRR	0.000113	2.5898e-07	4e-06	581	4	-2.8886	144	0.99989	1	1	18612	0
NHLRC2	2.1834e-06	2.5898e-07	4e-06	116	4	-2.8851	145	1	1	1	19013	0
HNRNPC	3.2267e-06	2.5898e-07	4e-06	142	4	-2.8849	146	0.99988	1	1	18604	0
NUP155	4.3853e-06	2.5898e-07	4e-06	167	4	-2.8834	147	0.99996	1	1	18755	0
ACTR1A	1.7623e-07	2.5898e-07	4e-06	40	4	-2.8723	148	1	1	1	19080	0
CCT5	6.2947e-06	2.5898e-07	4e-06	189	4	-2.8715	149	0.99999	1	1	18945	0
UBA52	7.1831e-05	2.5898e-07	4e-06	500	4	-2.8652	150	0.99993	1	1	18675	0
SMU1	1.7931e-06	2.5898e-07	4e-06	102	4	-2.8647	151	1	1	1	19025	0
PMF1	0.00088391	2.5898e-07	4e-06	1030	4	-2.8631	152	0.99889	1	1	18279	0
CCT4	2.2558e-07	2.5898e-07	4e-06	44	4	-2.8617	153	1	1	1	19077	0
PWP2	0.00057122	2.5898e-07	4e-06	933	3	-2.8615	154	0.84943	0.99002	1	14897	0
POLR2I	0.00017356	2.5898e-07	4e-06	663	4	-2.8475	155	0.98898	0.99993	1	17746	0
POLR2D	2.0583e-05	2.5898e-07	4e-06	317	4	-2.8443	156	0.99998	1	1	18831	0
VPRBP	5.76e-05	2.5898e-07	4e-06	467	4	-2.8399	157	0.99984	1	1	18552	0
RANGAP1	1.0489e-07	2.5898e-07	4e-06	32	4	-2.8397	158	1	1	1	19087	0
PRPF38B	0.0001378	2.5898e-07	4e-06	617	4	-2.8378	159	0.99932	1	1	18353	0
SF3B5	1.119e-05	2.5898e-07	4e-06	240	4	-2.8351	160	0.99999	1	1	18900	0
EIF3C	6.9129e-05	2.5898e-07	4e-06	496	4	-2.828	161	0.99993	1	1	18682	0
UTP15	9.9809e-05	2.5898e-07	4e-06	564	4	-2.8213	162	0.9999	1	1	18622	0
DDX23	2.63e-05	2.5898e-07	4e-06	348	4	-2.8207	163	0.99996	1	1	18761	0
CDCA8	9.2203e-07	2.5898e-07	4e-06	71	3	-2.8183	164	0.92366	0.99778	1	16254	0
TCP1	0.00012055	2.5898e-07	4e-06	592	4	-2.8129	165	0.99988	1	1	18602	0
MMS19	5.3101e-05	2.5898e-07	4e-06	457	4	-2.8024	166	0.99968	1	1	18462	0
DPH3	4.3662e-07	2.5898e-07	4e-06	51	4	-2.7994	167	1	1	1	19010	0
TAF1C	2.6133e-08	2.5898e-07	4e-06	9	4	-2.7943	168	1	1	1	19108	0
POLR1C	1.4921e-05	2.5898e-07	4e-06	272	4	-2.794	169	0.99999	1	1	18869	0
SRSF7	0.00097224	2.5898e-07	4e-06	1051	4	-2.7937	170	0.99231	0.99998	1	17854	0
IMP3	8.4046e-07	2.5898e-07	4e-06	66	4	-2.7933	171	1	1	1	19056	0
UTP6	0.00043871	2.5898e-07	4e-06	854	4	-2.7929	172	0.99789	1	1	18183	0
PFDN6	0.00039181	2.5898e-07	4e-06	829	4	-2.7879	173	0.99956	1	1	18422	0
U2AF1	4.7386e-06	2.5898e-07	4e-06	172	4	-2.7837	174	0.99998	1	1	18810	0
SREBF1	0.00035522	2.5898e-07	4e-06	803	3	-2.7775	175	0.94193	0.99858	1	16607	0
INTS1	0.00022375	2.5898e-07	4e-06	709	4	-2.7741	176	0.99701	1	1	18111	0
NACA	2.6978e-05	2.5898e-07	4e-06	354	4	-2.7665	177	0.99997	1	1	18800	0
COPE	2.251e-05	2.5898e-07	4e-06	327	4	-2.7655	178	0.99998	1	1	18821	0
MOCS3	0.0003671	2.5898e-07	4e-06	816	4	-2.7646	179	0.99924	1	1	18335	0
WDR18	4.4197e-07	2.5898e-07	4e-06	52	4	-2.7632	180	1	1	1	19068	0
UTP3	4.837e-05	2.5898e-07	4e-06	440	4	-2.761	181	0.99995	1	1	18727	0
URI1	5.5452e-06	2.5898e-07	4e-06	182	4	-2.7565	182	0.99999	1	1	18952	0
PSMC6	0.00025948	2.5898e-07	4e-06	738	4	-2.7517	183	0.9803	0.99977	1	17498	0
CCNH	9.2173e-06	2.5898e-07	4e-06	218	4	-2.7498	184	0.99999	1	1	18919	0
GPI	1.6148e-05	2.5898e-07	4e-06	286	4	-2.7469	185	0.99998	1	1	18858	0
RPS28	4.621e-05	2.5898e-07	4e-06	433	4	-2.7427	186	0.99706	1	1	18117	0
RPS18	3.8158e-07	2.5898e-07	4e-06	49	4	-2.7409	187	1	1	1	19072	0
RPL9	0.00071978	2.5898e-07	4e-06	988	3	-2.7353	188	0.95566	0.99909	1	16894	0
WASH1	0.00060134	2.5898e-07	4e-06	947	4	-2.7273	189	0.9994	1	1	18370	0
RPS27A	3.3491e-05	2.5898e-07	4e-06	387	4	-2.7251	190	0.99997	1	1	18775	0
ZNHIT3	0.00031866	2.5898e-07	4e-06	784	4	-2.7247	191	0.99968	1	1	18466	0
SEC22B	0.00062321	2.5898e-07	4e-06	958	3	-2.7211	192	0.66086	0.92963	1	11628	0
FDX1L	0.00040043	2.5898e-07	4e-06	831	4	-2.72	193	0.9996	1	1	18436	0
POLR2C	0.00020591	2.5898e-07	4e-06	698	4	-2.716	194	0.99979	1	1	18519	0
PCBP1	6.8096e-06	2.5898e-07	4e-06	197	4	-2.714	195	0.99999	1	1	18939	0
SNRPD2	6.437e-05	2.5898e-07	4e-06	486	4	-2.7097	196	0.99993	1	1	18679	0
UBL5	2.6309e-06	2.5898e-07	4e-06	129	4	-2.709	197	1	1	1	19002	0
SFPQ	0.00010019	2.5898e-07	4e-06	566	4	-2.7081	198	0.99969	1	1	18469	0
PSMC5	2.92e-05	2.5898e-07	4e-06	365	4	-2.6994	199	0.99997	1	1	18793	0
YRDC	0.00073596	2.5898e-07	4e-06	991	4	-2.698	200	0.99873	1	1	18259	0
RPSA	0.00057954	2.5898e-07	4e-06	936	3	-2.6963	201	0.95134	0.99894	1	16795	0
ALG13	0.00065875	2.5898e-07	4e-06	971	3	-2.6963	202	0.73685	0.95997	1	12916	0
CCT2	2.751e-06	2.5898e-07	4e-06	130	4	-2.6933	203	1	1	1	19001	0
SRSF3	0.00049066	2.5898e-07	4e-06	882	3	-2.6928	204	0.88369	0.99446	1	15515	0
EIF2B3	1.3437e-07	2.5898e-07	4e-06	36	4	-2.6807	205	1	1	1	19083	0
PRELID1	4.4601e-05	2.5898e-07	4e-06	425	4	-2.6771	206	0.96734	0.99952	1	17155	0
SBNO1	0.00063671	2.5898e-07	4e-06	965	4	-2.6755	207	0.99936	1	1	18359	0
CDIPT	0.00035462	2.5898e-07	4e-06	802	3	-2.6749	208	0.73223	0.9589	1	12836	0
POLR3B	0.00097692	2.5898e-07	4e-06	1054	3	-2.6732	209	0.92616	0.9979	1	16290	0
MCM3	0.00057856	2.5898e-07	4e-06	935	4	-2.6731	210	0.99942	1	1	18378	0
SAMM50	2.8143e-06	2.5898e-07	4e-06	132	4	-2.669	211	1	1	1	18999	0
NEDD1	0.0010501	2.5898e-07	4e-06	1072	4	-2.6656	212	0.99848	1	1	18230	0
RPS3A	6.5525e-06	2.5898e-07	4e-06	193	4	-2.6585	213	0.99848	1	1	18229	0
CAPZB	1.8965e-06	2.5898e-07	4e-06	104	4	-2.6559	214	1	1	1	19023	0
PRIM1	1.8994e-07	2.5898e-07	4e-06	43	4	-2.6557	215	1	1	1	19078	0
POLR3C	0.0030624	2.8488e-06	3.8e-05	1407	3	-2.6486	216	0.62559	0.91882	1	11001	0
RPS4X	1.3729e-06	2.5898e-07	4e-06	88	4	-2.6466	217	1	1	1	19038	0
PSMB3	2.9541e-06	2.5898e-07	4e-06	134	4	-2.6428	218	0.99915	1	1	18316	0
RPL36	3.4759e-05	2.5898e-07	4e-06	392	4	-2.6417	219	0.99997	1	1	18770	0
PSMA3	0.00035976	2.5898e-07	4e-06	809	3	-2.6396	220	0.17807	0.42481	1	3277	1
NAA10	3.9193e-06	2.5898e-07	4e-06	160	4	-2.6327	221	0.99999	1	1	18906	0
GRPEL1	1.0379e-06	2.5898e-07	4e-06	77	4	-2.6256	222	1	1	1	19048	0
NOP2	1.2192e-05	2.5898e-07	4e-06	257	4	-2.6226	223	0.99999	1	1	18884	0
RFC3	9.2292e-07	2.5898e-07	4e-06	72	4	-2.6203	224	1	1	1	19052	0
PRPF38A	0.0019443	1.2949e-06	1.9e-05	1251	3	-2.616	225	0.7405	0.9617	1	12976	0
GGPS1	6.3926e-06	2.5898e-07	4e-06	190	4	-2.6132	226	0.99999	1	1	18944	0
POLR3E	7.6438e-08	2.5898e-07	4e-06	28	4	-2.6104	227	1	1	1	19091	0
DDX56	9.8113e-05	2.5898e-07	4e-06	559	4	-2.6073	228	0.99948	1	1	18394	0
SNRNP200	1.1321e-05	2.5898e-07	4e-06	242	4	-2.599	229	0.99999	1	1	18898	0
MARS2	1.2075e-05	2.5898e-07	4e-06	253	4	-2.5971	230	0.99999	1	1	18888	0
BIRC5	1.5121e-05	2.5898e-07	4e-06	275	4	-2.5962	231	0.99998	1	1	18866	0
MVD	3.2462e-05	2.5898e-07	4e-06	383	4	-2.5958	232	0.99961	1	1	18439	0
DHX15	5.4048e-06	2.5898e-07	4e-06	180	4	-2.5953	233	0.99999	1	1	18953	0
RRN3	3.645e-05	2.5898e-07	4e-06	396	4	-2.593	234	0.99996	1	1	18765	0
NEDD8	8.1679e-06	2.5898e-07	4e-06	209	4	-2.5917	235	0.99999	1	1	18928	0
DYNC1H1	0.00012498	2.5898e-07	4e-06	603	3	-2.587	236	0.93568	0.99837	1	16469	0
TRRAP	9.5138e-07	2.5898e-07	4e-06	75	4	-2.5868	237	1	1	1	19033	0
C21orf59	5.9017e-06	2.5898e-07	4e-06	185	4	-2.5835	238	0.99999	1	1	18948	0
SNRNP25	1.9688e-06	2.5898e-07	4e-06	108	4	-2.5751	239	1	1	1	19019	0
CIRH1A	9.8067e-05	2.5898e-07	4e-06	558	4	-2.5654	240	0.9999	1	1	18625	0
PPP4C	0.00028711	2.5898e-07	4e-06	758	4	-2.563	241	0.99893	1	1	18285	0
ANAPC2	0.00045448	2.5898e-07	4e-06	861	3	-2.5614	242	0.0022968	0.036414	1	167	1
CARS	4.7163e-05	2.5898e-07	4e-06	436	4	-2.5547	243	0.99992	1	1	18652	0
GTPBP4	6.7e-05	2.5898e-07	4e-06	491	4	-2.5503	244	0.99993	1	1	18687	0
DYNLRB1	4.4521e-05	2.5898e-07	4e-06	424	4	-2.5434	245	0.99996	1	1	18738	0
SMC3	0.00046268	2.5898e-07	4e-06	865	3	-2.5412	246	0.7754	0.97425	1	13536	0
SDE2	3.0556e-05	2.5898e-07	4e-06	370	4	-2.5408	247	0.99997	1	1	18789	0
RPL19	8.5463e-09	2.5898e-07	4e-06	7	4	-2.5398	248	1	1	1	19111	0
POLD2	0.00015192	2.5898e-07	4e-06	639	4	-2.5398	249	0.99985	1	1	18560	0
NUBP1	5.0382e-06	2.5898e-07	4e-06	175	4	-2.5394	250	0.99999	1	1	18959	0
NAPA	2.0758e-06	2.5898e-07	4e-06	112	4	-2.5388	251	0.99999	1	1	18897	0
CDC23	0.0026683	1.8129e-06	2.5e-05	1359	3	-2.5343	252	0.19337	0.44289	1	3521	1
RPL23	0.00030816	2.5898e-07	4e-06	777	4	-2.5242	253	0.97207	0.99957	1	17260	0
DCTN6	0.0001218	2.5898e-07	4e-06	593	4	-2.5236	254	0.99988	1	1	18601	0
RPL37	5.9495e-05	2.5898e-07	4e-06	473	4	-2.5233	255	0.99994	1	1	18703	0
FNTA	0.00052322	2.5898e-07	4e-06	906	4	-2.5233	256	0.99707	1	1	18118	0
ZCRB1	9.2534e-06	2.5898e-07	4e-06	219	4	-2.5229	257	0.99988	1	1	18600	0
CUL3	2.5573e-06	2.5898e-07	4e-06	124	3	-2.52	258	0.77078	0.97323	1	13466	0
PELO	2.0488e-06	2.5898e-07	4e-06	111	4	-2.5175	259	1	1	1	19016	0
RPS19	0.0001873	2.5898e-07	4e-06	678	4	-2.5142	260	0.99981	1	1	18528	0
NARS	0.00075757	2.5898e-07	4e-06	995	4	-2.5137	261	0.98304	0.99984	1	17574	0
ETF1	0.00020975	2.5898e-07	4e-06	699	4	-2.513	262	0.99979	1	1	18518	0
SNRPG	8.8134e-07	2.5898e-07	4e-06	68	4	-2.5088	263	1	1	1	19054	0
MRPL57	0.00012216	2.5898e-07	4e-06	594	4	-2.5078	264	0.99988	1	1	18599	0
CRCP	2.9317e-05	2.5898e-07	4e-06	366	4	-2.5026	265	0.99986	1	1	18582	0
GRB2	1.0874e-05	2.5898e-07	4e-06	236	4	-2.5017	266	0.99999	1	1	18905	0
TBCE	0.00045024	2.5898e-07	4e-06	859	4	-2.5008	267	0.99921	1	1	18327	0
RPS23	8.1828e-05	2.5898e-07	4e-06	531	4	-2.5004	268	0.9999	1	1	18628	0
ZBTB8OS	2.8685e-05	2.5898e-07	4e-06	364	4	-2.4945	269	0.99958	1	1	18425	0
PSMD3	1.1782e-05	2.5898e-07	4e-06	249	4	-2.4898	270	0.99999	1	1	18892	0
GFER	3.1058e-05	2.5898e-07	4e-06	375	4	-2.4872	271	0.99997	1	1	18784	0
SKIV2L2	0.00019299	2.5898e-07	4e-06	686	4	-2.4841	272	0.99981	1	1	18524	0
ILF3	2.1661e-05	2.5898e-07	4e-06	323	4	-2.4828	273	0.99998	1	1	18825	0
INTS4	0.00015885	2.5898e-07	4e-06	649	4	-2.4809	274	0.99984	1	1	18550	0
ORC1	0.0002058	2.5898e-07	4e-06	697	4	-2.4804	275	0.99976	1	1	18501	0
TRNT1	0.00046484	2.5898e-07	4e-06	867	3	-2.4768	276	0.074363	0.2752	1	1706	1
ENO1	2.5924e-05	2.5898e-07	4e-06	345	4	-2.4739	277	0.99994	1	1	18694	0
THOC3	1.6863e-05	2.5898e-07	4e-06	293	4	-2.4737	278	0.99998	1	1	18853	0
ATP2A2	0.00046935	2.5898e-07	4e-06	871	4	-2.4695	279	0.97348	0.99964	1	17297	0
DNLZ	0.00041692	2.5898e-07	4e-06	843	4	-2.4687	280	0.99132	0.99998	1	17815	0
DNA2	1.0384e-05	2.5898e-07	4e-06	230	4	-2.4623	281	0.99999	1	1	18910	0
EIF5	0.00051702	2.5898e-07	4e-06	896	4	-2.4599	282	0.97704	0.99971	1	17400	0
WWTR1	9.4617e-06	2.5898e-07	4e-06	221	4	-2.4589	283	0.99999	1	1	18917	0
NOP14	7.0977e-07	2.5898e-07	4e-06	65	4	-2.4573	284	1	1	1	19057	0
NOP56	3.0447e-06	2.5898e-07	4e-06	137	4	-2.4554	285	1	1	1	18995	0
SRP9	0.00014545	2.5898e-07	4e-06	629	4	-2.4539	286	0.99862	1	1	18246	0
DHFR	3.6136e-05	2.5898e-07	4e-06	394	4	-2.4529	287	0.99996	1	1	18767	0
XRCC6	1.2316e-06	2.5898e-07	4e-06	84	4	-2.4526	288	1	1	1	19042	0
RPS25	0.00014125	2.5898e-07	4e-06	624	4	-2.4402	289	0.99986	1	1	18575	0
ATP5B	0.00015527	2.5898e-07	4e-06	644	4	-2.4387	290	0.99984	1	1	18556	0
UBE2N	0.0007969	2.5898e-07	4e-06	1006	4	-2.4324	291	0.98773	0.99992	1	17714	0
RPL7A	0.00030149	2.5898e-07	4e-06	766	3	-2.4311	292	0.92401	0.99778	1	16258	0
RPL35A	6.4294e-08	2.5898e-07	4e-06	25	4	-2.4306	293	1	1	1	19094	0
ATP6AP1	4.5044e-05	2.5898e-07	4e-06	427	4	-2.428	294	0.99995	1	1	18737	0
NUS1	6.9205e-06	2.5898e-07	4e-06	198	4	-2.4277	295	0.99999	1	1	18938	0
YARS	1.1442e-05	2.5898e-07	4e-06	245	4	-2.4267	296	0.99999	1	1	18895	0
MCM6	0.00029987	2.5898e-07	4e-06	765	3	-2.4253	297	0.32975	0.658	1	5831	0
BRIX1	3.7459e-06	2.5898e-07	4e-06	156	4	-2.4217	298	1	1	1	18976	0
EXOSC9	1.8185e-05	2.5898e-07	4e-06	300	4	-2.4212	299	0.99998	1	1	18847	0
ABCF1	3.313e-06	2.5898e-07	4e-06	143	4	-2.42	300	1	1	1	18989	0
EIF1AX	7.3483e-06	2.5898e-07	4e-06	205	4	-2.42	301	0.99999	1	1	18932	0
RBM8A	1.8841e-05	2.5898e-07	4e-06	306	4	-2.4188	302	0.99998	1	1	18840	0
KANSL1	4.1144e-05	2.5898e-07	4e-06	413	4	-2.4132	303	0.99996	1	1	18748	0
CLTC	3.3654e-06	2.5898e-07	4e-06	146	4	-2.4118	304	1	1	1	18986	0
RPL10A	0.0012847	2.5898e-07	4e-06	1136	4	-2.4104	305	0.99742	1	1	18139	0
DARS	1.1611e-05	2.5898e-07	4e-06	246	4	-2.4098	306	0.99999	1	1	18894	0
USP17L19	0.00024885	2.5898e-07	4e-06	734	3	-2.4077	307	0.87325	0.99322	1	15341	0
WDR74	3.4972e-06	2.5898e-07	4e-06	152	4	-2.4062	308	1	1	1	18980	0
TP53RK	3.5752e-05	2.5898e-07	4e-06	393	4	-2.402	309	0.99996	1	1	18768	0
PMF1-BGLAP	5.5037e-08	2.5898e-07	4e-06	21	4	-2.3998	310	1	1	1	19097	0
EIF2B4	3.1322e-06	2.5898e-07	4e-06	140	4	-2.3992	311	1	1	1	18991	0
MSTO1	0.00049857	2.5898e-07	4e-06	888	4	-2.3988	312	0.9995	1	1	18404	0
NELFCD	0.00011397	2.5898e-07	4e-06	584	4	-2.3952	313	0.99927	1	1	18337	0
IPO13	1.0031e-06	2.5898e-07	4e-06	76	4	-2.3917	314	1	1	1	19049	0
RPL10	7.2478e-05	2.5898e-07	4e-06	502	4	-2.3893	315	0.99993	1	1	18673	0
DDX47	0.00049874	2.5898e-07	4e-06	889	4	-2.3893	316	0.9995	1	1	18403	0
RPA3	5.2448e-05	2.5898e-07	4e-06	454	4	-2.3827	317	0.99995	1	1	18716	0
MAK16	3.3614e-06	2.5898e-07	4e-06	145	4	-2.3824	318	1	1	1	18987	0
SLC35B1	1.5525e-05	2.5898e-07	4e-06	279	4	-2.3792	319	0.99998	1	1	18863	0
EIF6	1.3078e-06	2.5898e-07	4e-06	87	4	-2.3774	320	1	1	1	19039	0
EIF3D	0.0004708	2.5898e-07	4e-06	872	4	-2.3759	321	0.97942	0.99977	1	17461	0
EEF2	0.00088281	2.5898e-07	4e-06	1029	3	-2.3755	322	0.51863	0.84601	1	9132	0
SUPT6H	0.00020225	2.5898e-07	4e-06	694	4	-2.3748	323	0.99939	1	1	18367	0
DHX37	3.1037e-05	2.5898e-07	4e-06	374	4	-2.3738	324	0.99997	1	1	18785	0
PPP1R8	1.5958e-05	2.5898e-07	4e-06	283	4	-2.3723	325	0.99981	1	1	18526	0
HAUS3	0.00016183	2.5898e-07	4e-06	655	4	-2.3688	326	0.99984	1	1	18546	0
SNUPN	3.8238e-07	2.5898e-07	4e-06	50	4	-2.3686	327	1	1	1	19071	0
CCT7	1.098e-06	2.5898e-07	4e-06	80	4	-2.362	328	1	1	1	19045	0
SF3B4	0.00017869	2.5898e-07	4e-06	668	4	-2.3617	329	0.99982	1	1	18535	0
SMC2	0.00054609	2.5898e-07	4e-06	916	4	-2.3602	330	0.99819	1	1	18205	0
LARS	0.00022615	2.5898e-07	4e-06	712	4	-2.3576	331	0.99977	1	1	18507	0
PRMT5	4.813e-07	2.5898e-07	4e-06	55	4	-2.3555	332	1	1	1	19065	0
IARS2	7.1148e-05	2.5898e-07	4e-06	499	4	-2.3529	333	0.99993	1	1	18677	0
PNKP	0.0021917	1.2949e-06	1.9e-05	1290	4	-2.3494	334	0.99296	0.99999	1	17885	0
ANAPC11	1.8561e-07	2.5898e-07	4e-06	42	4	-2.3489	335	1	1	1	19073	0
HNRNPL	0.00049646	2.5898e-07	4e-06	886	3	-2.3484	336	0.32446	0.64711	1	5740	0
CIAO1	4.6822e-07	2.5898e-07	4e-06	54	4	-2.3482	337	1	1	1	19066	0
EFTUD2	3.7863e-05	2.5898e-07	4e-06	400	4	-2.3477	338	0.99996	1	1	18762	0
MED6	3.8591e-05	2.5898e-07	4e-06	404	4	-2.3444	339	0.99996	1	1	18757	0
TTK	0.001121	2.5898e-07	4e-06	1093	3	-2.3372	340	0.73656	0.95962	1	12908	0
RPS29	5.007e-05	2.5898e-07	4e-06	446	4	-2.3366	341	0.99929	1	1	18343	0
ZNHIT2	7.7514e-05	2.5898e-07	4e-06	514	4	-2.3345	342	0.99992	1	1	18664	0
USP39	4.4479e-08	2.5898e-07	4e-06	14	4	-2.3339	343	1	1	1	19103	0
HMGCS1	1.1896e-05	2.5898e-07	4e-06	250	4	-2.3298	344	0.99999	1	1	18891	0
LSM4	0.00024411	2.5898e-07	4e-06	728	4	-2.3295	345	0.96026	0.99936	1	16992	0
AARS	1.2004e-08	2.5898e-07	4e-06	8	4	-2.3258	346	1	1	1	19110	0
NBPF10	3.8391e-06	2.5898e-07	4e-06	158	4	-2.3243	347	1	1	1	18974	0
CEBPZ	0.00018804	2.5898e-07	4e-06	680	4	-2.322	348	0.99173	0.99998	1	17828	0
SNRPE	2.7837e-05	2.5898e-07	4e-06	360	4	-2.3217	349	0.99661	1	1	18081	0
RPL32	0.0001841	2.5898e-07	4e-06	674	4	-2.3206	350	0.9935	0.99999	1	17909	0
CTDNEP1	2.9738e-06	2.5898e-07	4e-06	135	4	-2.3202	351	1	1	1	18997	0
RRM1	5.9705e-05	2.5898e-07	4e-06	475	4	-2.3193	352	0.99994	1	1	18702	0
RPL35	2.5353e-05	2.5898e-07	4e-06	344	4	-2.3191	353	0.99997	1	1	18807	0
PNO1	0.0012624	2.5898e-07	4e-06	1129	3	-2.3182	354	0.94091	0.99855	1	16583	0
EIF2B2	0.00051202	2.5898e-07	4e-06	895	4	-2.3174	355	0.99914	1	1	18314	0
DKC1	4.6104e-05	2.5898e-07	4e-06	431	4	-2.3128	356	0.99995	1	1	18733	0
MCM5	2.3073e-05	2.5898e-07	4e-06	329	4	-2.3089	357	0.99982	1	1	18531	0
RPS2	0.0009419	2.5898e-07	4e-06	1046	3	-2.3087	358	0.036101	0.20806	1	1170	1
RPL18A	1.1642e-05	2.5898e-07	4e-06	247	4	-2.3077	359	0.99999	1	1	18893	0
VPS52	1.2547e-06	2.5898e-07	4e-06	85	4	-2.3023	360	1	1	1	19041	0
HSPA8	7.2937e-08	2.5898e-07	4e-06	27	4	-2.3007	361	1	1	1	19092	0
TCEB2	6.4103e-05	2.5898e-07	4e-06	485	4	-2.3	362	0.99994	1	1	18692	0
TRIAP1	2.4804e-05	2.5898e-07	4e-06	341	4	-2.2942	363	0.99998	1	1	18809	0
COPS5	0.0014393	7.7695e-07	1.2e-05	1166	4	-2.2924	364	0.98803	0.99992	1	17724	0
TRAPPC4	0.00044341	2.5898e-07	4e-06	856	4	-2.292	365	0.99865	1	1	18249	0
ZPR1	4.9369e-07	2.5898e-07	4e-06	57	4	-2.2913	366	1	1	1	19063	0
RAD1	9.4799e-05	2.5898e-07	4e-06	552	4	-2.291	367	0.97505	0.9997	1	17334	0
RPL6	2.1398e-06	2.5898e-07	4e-06	114	4	-2.29	368	1	1	1	19014	0
PSMB5	9.901e-06	2.5898e-07	4e-06	225	4	-2.2881	369	0.99999	1	1	18913	0
MIS18A	0.0045812	5.9567e-06	7.3e-05	1567	3	-2.2852	370	0.52554	0.8498	1	9255	0
NHP2	5.8647e-06	2.5898e-07	4e-06	184	4	-2.284	371	0.99999	1	1	18950	0
PSMD8	0.00056736	2.5898e-07	4e-06	927	4	-2.2839	372	0.98222	0.99982	1	17545	0
MED11	0.00055868	2.5898e-07	4e-06	924	4	-2.2835	373	0.99944	1	1	18383	0
MAT2A	2.5806e-06	2.5898e-07	4e-06	127	4	-2.2823	374	1	1	1	19004	0
PTPMT1	0.00060605	2.5898e-07	4e-06	950	4	-2.281	375	0.99572	1	1	18022	0
LMNA	0.0012634	2.5898e-07	4e-06	1130	3	-2.28	376	0.48307	0.82109	1	8522	0
DNAJC9	0.002951	2.3309e-06	3.2e-05	1396	4	-2.2794	377	0.99257	0.99998	1	17868	0
LAMTOR3	0.0021927	1.2949e-06	1.9e-05	1291	4	-2.2782	378	0.9976	1	1	18163	0
ORC6	1.6579e-06	2.5898e-07	4e-06	98	4	-2.278	379	1	1	1	19029	0
TANGO6	1.893e-05	2.5898e-07	4e-06	309	4	-2.2735	380	0.99998	1	1	18837	0
PPIAL4E	1.6546e-05	2.5898e-07	4e-06	290	4	-2.272	381	0.99998	1	1	18855	0
NARFL	6.052e-06	2.5898e-07	4e-06	187	4	-2.2717	382	0.99999	1	1	18925	0
QARS	0.0066345	1.4762e-05	0.000165	1709	3	-2.2717	383	0.897	0.99576	1	15752	0
NOP58	1.2171e-05	2.5898e-07	4e-06	256	4	-2.2707	384	0.99999	1	1	18885	0
HDAC3	0.00016028	2.5898e-07	4e-06	651	4	-2.2691	385	0.99984	1	1	18548	0
GTF2E2	0.00035192	2.5898e-07	4e-06	800	4	-2.2667	386	0.998	1	1	18189	0
MTBP	0.00024338	2.5898e-07	4e-06	726	3	-2.2616	387	0.99976	1	1	18497	0
TMX2	5.9863e-05	2.5898e-07	4e-06	477	4	-2.2554	388	0.99994	1	1	18700	0
PSMD14	1.0577e-05	2.5898e-07	4e-06	233	4	-2.2531	389	0.97707	0.99971	1	17402	0
POLR3A	0.00013037	2.5898e-07	4e-06	610	4	-2.2531	390	0.99987	1	1	18587	0
RPS17	1.5133e-05	2.5898e-07	4e-06	276	4	-2.2522	391	0.99998	1	1	18865	0
UROD	5.9616e-05	2.5898e-07	4e-06	474	4	-2.2522	392	0.99978	1	1	18511	0
PSMA4	0.00034	2.5898e-07	4e-06	793	4	-2.2509	393	0.99966	1	1	18456	0
DUT	2.3784e-06	2.5898e-07	4e-06	120	4	-2.2507	394	0.99997	1	1	18769	0
CCNA2	0.00015185	2.5898e-07	4e-06	638	4	-2.2472	395	0.99985	1	1	18561	0
MVK	0.0055417	9.0645e-06	0.000105	1635	3	-2.2458	396	0.8978	0.99579	1	15771	0
AP2S1	1.2657e-07	2.5898e-07	4e-06	34	4	-2.2451	397	1	1	1	19085	0
NOC4L	3.4329e-06	2.5898e-07	4e-06	150	4	-2.2391	398	1	1	1	18982	0
EIF3G	8.7712e-05	2.5898e-07	4e-06	541	4	-2.2378	399	0.99991	1	1	18642	0
RPL28	8.5946e-05	2.5898e-07	4e-06	538	4	-2.2376	400	0.99991	1	1	18645	0
SMC4	7.734e-05	2.5898e-07	4e-06	511	3	-2.2368	401	0.79335	0.97742	1	13848	0
UTP23	0.00091178	2.5898e-07	4e-06	1037	4	-2.2359	402	0.99164	0.99998	1	17827	0
NSL1	0.00037909	2.5898e-07	4e-06	823	4	-2.2335	403	0.99962	1	1	18440	0
DUX4	7.2885e-05	2.5898e-07	4e-06	503	4	-2.2319	404	0.99993	1	1	18672	0
TBC1D3C	4.1596e-05	2.5898e-07	4e-06	414	4	-2.2297	405	0.99415	0.99999	1	17930	0
WDR73	1.0633e-06	2.5898e-07	4e-06	79	4	-2.2284	406	1	1	1	19046	0
DDX10	2.3383e-05	2.5898e-07	4e-06	332	4	-2.2249	407	0.99998	1	1	18817	0
COPS6	4.2378e-05	2.5898e-07	4e-06	417	4	-2.2241	408	0.99996	1	1	18745	0
DDX54	4.1473e-08	2.5898e-07	4e-06	12	4	-2.2219	409	1	1	1	19105	0
NSA2	5.9076e-05	2.5898e-07	4e-06	472	4	-2.2196	410	0.99994	1	1	18704	0
SCD	0.00010443	2.5898e-07	4e-06	571	4	-2.2175	411	0.9999	1	1	18617	0
GNL3	2.772e-06	2.5898e-07	4e-06	131	4	-2.2142	412	1	1	1	19000	0
USP17L30	0.0015532	7.7695e-07	1.2e-05	1192	4	-2.2109	413	0.99845	1	1	18223	0
NUDT21	0.00015317	2.5898e-07	4e-06	641	4	-2.21	414	0.99849	1	1	18231	0
PSMD12	1.1606e-06	2.5898e-07	4e-06	82	4	-2.2048	415	1	1	1	19043	0
KARS	1.0641e-07	2.5898e-07	4e-06	33	4	-2.2043	416	1	1	1	19086	0
ACTB	7.2829e-06	2.5898e-07	4e-06	204	4	-2.2014	417	0.99999	1	1	18933	0
GNB1L	0.0019915	1.2949e-06	1.9e-05	1260	3	-2.2	418	0.67769	0.93588	1	11913	0
NLE1	4.5586e-05	2.5898e-07	4e-06	429	4	-2.1997	419	0.99995	1	1	18734	0
USP9X	0.002838	2.3309e-06	3.2e-05	1386	3	-2.199	420	0.67769	0.93588	1	11912	0
POLR2K	5.2319e-07	2.5898e-07	4e-06	59	4	-2.1973	421	1	1	1	19062	0
PMVK	0.00066056	2.5898e-07	4e-06	973	4	-2.1958	422	0.995	0.99999	1	17978	0
SF3B3	0.00086755	2.5898e-07	4e-06	1023	4	-2.1941	423	0.97129	0.99957	1	17245	0
CHEK1	0.00030158	2.5898e-07	4e-06	767	4	-2.1939	424	0.9997	1	1	18475	0
DONSON	0.0079592	2.4604e-05	0.000261	1804	4	-2.1903	425	0.99204	0.99998	1	17843	0
CENPK	0.0015523	7.7695e-07	1.2e-05	1191	4	-2.1881	426	0.9952	1	1	17991	0
PREB	0.00056973	2.5898e-07	4e-06	931	4	-2.1873	427	0.97979	0.99977	1	17479	0
UXT	1.9545e-05	2.5898e-07	4e-06	311	4	-2.1861	428	0.99998	1	1	18835	0
RPAP1	0.0049551	8.0285e-06	9.6e-05	1592	4	-2.1844	429	0.97877	0.99977	1	17446	0
C19orf43	1.9391e-06	2.5898e-07	4e-06	106	4	-2.1814	430	1	1	1	19021	0
NSF	5.638e-07	2.5898e-07	4e-06	61	3	-2.1799	431	0.85754	0.99152	1	15048	0
MEPCE	0.0013838	7.7695e-07	1.2e-05	1154	4	-2.1771	432	0.99815	1	1	18201	0
SAE1	8.9693e-06	2.5898e-07	4e-06	214	4	-2.1768	433	0.99999	1	1	18922	0
RPS5	4.6839e-05	2.5898e-07	4e-06	435	4	-2.17	434	0.99983	1	1	18541	0
DIS3	4.7691e-06	2.5898e-07	4e-06	173	4	-2.1695	435	1	1	1	18961	0
MCRS1	0.00053576	2.5898e-07	4e-06	912	3	-2.169	436	0.26118	0.53958	1	4664	0
TXNRD1	2.3471e-05	2.5898e-07	4e-06	334	4	-2.1687	437	0.97828	0.99975	1	17428	0
CPSF3L	2.3435e-05	2.5898e-07	4e-06	333	4	-2.1686	438	0.99998	1	1	18816	0
NFS1	0.0010071	2.5898e-07	4e-06	1061	4	-2.1678	439	0.99761	1	1	18164	0
CBWD5	8.3393e-05	2.5898e-07	4e-06	534	4	-2.1621	440	0.99992	1	1	18647	0
TBCB	0.0015983	7.7695e-07	1.2e-05	1198	4	-2.1583	441	0.9966	1	1	18080	0
EIF4A3	0.00013932	2.5898e-07	4e-06	621	4	-2.1565	442	0.99986	1	1	18578	0
PSMC3	0.00074598	2.5898e-07	4e-06	993	4	-2.1538	443	0.98906	0.99993	1	17748	0
C19orf53	0.002313	1.2949e-06	1.9e-05	1308	3	-2.1456	444	0.54899	0.86809	1	9657	0
PHB	2.5923e-06	2.5898e-07	4e-06	128	4	-2.1419	445	1	1	1	19003	0
PPP2R1A	5.2959e-05	2.5898e-07	4e-06	455	4	-2.1401	446	0.99995	1	1	18715	0
POLR2G	1.9707e-05	2.5898e-07	4e-06	313	3	-2.1394	447	0.90371	0.99623	1	15875	0
RBBP4	0.00031351	2.5898e-07	4e-06	780	4	-2.1378	448	0.99969	1	1	18467	0
TAF1A	0.0027371	2.3309e-06	3.2e-05	1373	3	-2.1363	449	0.14153	0.34674	1	2698	1
ATP6V1A	4.3291e-06	2.5898e-07	4e-06	166	4	-2.1357	450	1	1	1	18967	0
GARS	0.00024766	2.5898e-07	4e-06	733	3	-2.1344	451	0.79386	0.97742	1	13858	0
PFDN5	4.265e-05	2.5898e-07	4e-06	418	4	-2.1342	452	0.99996	1	1	18744	0
EGLN1	2.0932e-05	2.5898e-07	4e-06	320	4	-2.1319	453	0.99998	1	1	18828	0
DDX49	0.0027902	2.3309e-06	3.2e-05	1383	3	-2.1315	454	0.72355	0.9567	1	12690	0
DDX59	2.4121e-05	2.5898e-07	4e-06	337	4	-2.1309	455	0.99998	1	1	18813	0
DHX33	0.00012865	2.5898e-07	4e-06	608	3	-2.1304	456	0.19624	0.44513	1	3577	1
HYPK	9.3302e-06	2.5898e-07	4e-06	220	4	-2.1275	457	0.99999	1	1	18918	0
RBM25	1.7956e-05	2.5898e-07	4e-06	298	4	-2.1256	458	0.99998	1	1	18849	0
RPL7	1.6916e-06	2.5898e-07	4e-06	99	4	-2.125	459	1	1	1	19028	0
BCL2L2-PABPN1	0.0024444	1.8129e-06	2.5e-05	1327	3	-2.1232	460	0.83782	0.98762	1	14679	0
PSMB2	0.00080457	2.5898e-07	4e-06	1007	4	-2.1203	461	0.9992	1	1	18325	0
JUN	0.0004401	2.5898e-07	4e-06	855	4	-2.1201	462	0.98523	0.99989	1	17637	0
UBE2I	0.0010556	2.5898e-07	4e-06	1074	4	-2.1173	463	0.99692	1	1	18104	0
SRP54	0.00015248	2.5898e-07	4e-06	640	4	-2.117	464	0.99944	1	1	18386	0
RPS3	0.00077081	2.5898e-07	4e-06	1000	4	-2.115	465	0.99923	1	1	18330	0
POLE	0.0015511	7.7695e-07	1.2e-05	1190	4	-2.1101	466	0.98652	0.99991	1	17672	0
TUBGCP3	2.1157e-05	2.5898e-07	4e-06	321	4	-2.1082	467	0.99998	1	1	18827	0
SPATA5L1	1.8878e-05	2.5898e-07	4e-06	307	4	-2.1073	468	0.99998	1	1	18839	0
CSNK1A1	0.0014686	7.7695e-07	1.2e-05	1170	3	-2.1062	469	0.95495	0.99907	1	16882	0
THAP7	2.5151e-05	2.5898e-07	4e-06	343	4	-2.1048	470	0.99997	1	1	18808	0
GTF3C1	9.1055e-06	2.5898e-07	4e-06	217	4	-2.1047	471	0.99999	1	1	18920	0
RPF2	1.2139e-05	2.5898e-07	4e-06	255	4	-2.1038	472	0.99999	1	1	18886	0
ANAPC4	1.1672e-05	2.5898e-07	4e-06	248	4	-2.1017	473	0.99999	1	1	18882	0
SHFM1	0.00099341	2.5898e-07	4e-06	1057	3	-2.1008	474	0.92237	0.99774	1	16231	0
GLTSCR2	0.00015754	2.5898e-07	4e-06	648	4	-2.0995	475	0.99984	1	1	18551	0
MRTO4	0.0044218	4.9207e-06	6e-05	1551	3	-2.0989	476	0.62742	0.91943	1	11037	0
COPB2	0.0019251	1.2949e-06	1.9e-05	1248	3	-2.0952	477	0.95287	0.99902	1	16835	0
HSPA9	3.7635e-06	2.5898e-07	4e-06	157	4	-2.0926	478	1	1	1	18975	0
ATG9A	0.00043423	2.5898e-07	4e-06	852	4	-2.0915	479	0.99224	0.99998	1	17851	0
SF1	0.00030734	2.5898e-07	4e-06	775	4	-2.0914	480	0.99965	1	1	18449	0
VPS51	2.8297e-05	2.5898e-07	4e-06	362	4	-2.0912	481	0.99997	1	1	18794	0
CSE1L	0.00016109	2.5898e-07	4e-06	652	3	-2.0902	482	0.65787	0.92854	1	11572	0
TWISTNB	0.0050279	8.5465e-06	0.000101	1595	3	-2.0892	483	0.41705	0.76718	1	7397	0
EIF2B5	0.00061951	2.5898e-07	4e-06	956	4	-2.0868	484	0.96775	0.99953	1	17166	0
MZT1	0.0020661	1.2949e-06	1.9e-05	1272	3	-2.0867	485	0.72773	0.95782	1	12763	0
HEATR1	2.288e-06	2.5898e-07	4e-06	118	4	-2.0853	486	1	1	1	19011	0
POLE2	1.5964e-05	2.5898e-07	4e-06	284	4	-2.0853	487	0.99998	1	1	18860	0
PPP1R7	0.0026914	1.8129e-06	2.5e-05	1363	3	-2.0845	488	0.84466	0.98915	1	14818	0
NOL6	0.00090158	2.5898e-07	4e-06	1033	3	-2.0836	489	0.56389	0.87837	1	9925	0
SEC61A1	0.00019263	2.5898e-07	4e-06	684	4	-2.0812	490	0.9991	1	1	18308	0
VMP1	7.9757e-05	2.5898e-07	4e-06	522	4	-2.0791	491	0.99992	1	1	18658	0
RPL3	0.0018123	7.7695e-07	1.2e-05	1229	3	-2.0781	492	0.70048	0.9481	1	12291	0
NDC80	0.00076414	2.5898e-07	4e-06	999	4	-2.0747	493	0.99924	1	1	18331	0
TBCD	1.95e-05	2.5898e-07	4e-06	310	4	-2.0742	494	0.99998	1	1	18836	0
MED8	9.9429e-06	2.5898e-07	4e-06	227	4	-2.0739	495	0.99977	1	1	18504	0
C7orf26	1.6531e-06	2.5898e-07	4e-06	97	4	-2.0733	496	1	1	1	19030	0
TUBA1B	1.8992e-06	2.5898e-07	4e-06	105	4	-2.0729	497	1	1	1	19022	0
IMP4	1.8915e-05	2.5898e-07	4e-06	308	4	-2.0727	498	0.99998	1	1	18838	0
EIF3CL	1.2739e-05	2.5898e-07	4e-06	259	4	-2.0724	499	0.99999	1	1	18880	0
YARS2	3.5985e-06	2.5898e-07	4e-06	154	4	-2.0719	500	1	1	1	18978	0
AURKA	0.0012246	2.5898e-07	4e-06	1119	3	-2.0715	501	0.67706	0.93588	1	11900	0
RNMT	0.0015025	7.7695e-07	1.2e-05	1181	4	-2.071	502	0.97063	0.99957	1	17231	0
PPIL2	0.00070191	2.5898e-07	4e-06	984	4	-2.0698	503	0.9993	1	1	18345	0
INCENP	0.00012379	2.5898e-07	4e-06	602	4	-2.069	504	0.99988	1	1	18593	0
LRR1	4.3336e-05	2.5898e-07	4e-06	419	4	-2.0685	505	0.99996	1	1	18742	0
RFT1	0.00026941	2.5898e-07	4e-06	746	3	-2.0682	506	0.88292	0.99438	1	15502	0
C1orf109	7.8845e-05	2.5898e-07	4e-06	518	4	-2.0668	507	0.99992	1	1	18660	0
NBAS	0.0011097	2.5898e-07	4e-06	1090	4	-2.0656	508	0.99889	1	1	18278	0
VPS13D	2.3633e-06	2.5898e-07	4e-06	119	4	-2.0649	509	1	1	1	19009	0
SNAPC5	0.0001183	2.5898e-07	4e-06	589	4	-2.0644	510	0.95734	0.9992	1	16926	0
SSRP1	3.0674e-06	2.5898e-07	4e-06	139	4	-2.0633	511	1	1	1	18993	0
RPL4	0.001589	7.7695e-07	1.2e-05	1196	4	-2.0619	512	0.9718	0.99957	1	17256	0
SETD1A	0.0014986	7.7695e-07	1.2e-05	1180	4	-2.061	513	0.98304	0.99984	1	17576	0
SNRPA1	0.00061898	2.5898e-07	4e-06	955	4	-2.0587	514	0.99938	1	1	18365	0
RRS1	0.00022387	2.5898e-07	4e-06	710	4	-2.0584	515	0.99978	1	1	18509	0
CLP1	0.00010906	2.5898e-07	4e-06	576	4	-2.0549	516	0.97616	0.99971	1	17370	0
SPATA5	0.00012246	2.5898e-07	4e-06	596	4	-2.0549	517	0.99988	1	1	18597	0
WDR55	0.0017243	7.7695e-07	1.2e-05	1211	4	-2.0526	518	0.9891	0.99993	1	17749	0
ATP6V1G1	0.0019581	1.2949e-06	1.9e-05	1253	4	-2.0478	519	0.96531	0.99947	1	17105	0
ACTR2	5.5392e-06	2.5898e-07	4e-06	181	4	-2.0469	520	0.99751	1	1	18154	0
ANKRD49	0.0022347	1.2949e-06	1.9e-05	1296	3	-2.0451	521	0.30333	0.61107	1	5371	0
SACM1L	0.00011284	2.5898e-07	4e-06	580	3	-2.0441	522	0.62439	0.91824	1	10977	0
CTC1	0.00035552	2.5898e-07	4e-06	805	4	-2.043	523	0.99964	1	1	18447	0
NCBP1	0.00012302	2.5898e-07	4e-06	600	3	-2.0418	524	0.91606	0.99706	1	16122	0
RABGGTA	0.0001274	2.5898e-07	4e-06	607	4	-2.0379	525	0.99987	1	1	18589	0
LSM3	0.00217	1.2949e-06	1.9e-05	1288	3	-2.0376	526	0.50555	0.83793	1	8918	0
LAS1L	0.00018577	2.5898e-07	4e-06	676	3	-2.035	527	0.51819	0.84499	1	9126	0
LAMTOR2	6.1511e-07	2.5898e-07	4e-06	63	4	-2.0348	528	1	1	1	19059	0
HAUS7	7.1476e-06	2.5898e-07	4e-06	202	4	-2.0323	529	0.99999	1	1	18901	0
RPS12	2.2849e-05	2.5898e-07	4e-06	328	4	-2.031	530	0.99998	1	1	18820	0
NAA50	3.4317e-05	2.5898e-07	4e-06	391	4	-2.0292	531	0.99997	1	1	18771	0
RPL13A	0.0018619	1.2949e-06	1.9e-05	1236	3	-2.0287	532	0.48836	0.8265	1	8614	0
TMEM199	5.312e-05	2.5898e-07	4e-06	458	4	-2.0257	533	0.99995	1	1	18713	0
LOC102724862	0.0018178	7.7695e-07	1.2e-05	1230	4	-2.0257	534	0.99818	1	1	18204	0
GEMIN6	0.002729	2.3309e-06	3.2e-05	1369	3	-2.0254	535	0.93704	0.99837	1	16501	0
C19orf52	0.00014662	2.5898e-07	4e-06	631	4	-2.022	536	0.99985	1	1	18569	0
GOSR2	6.741e-06	2.5898e-07	4e-06	195	4	-2.0219	537	0.99999	1	1	18940	0
NUP98	1.3557e-05	2.5898e-07	4e-06	265	4	-2.02	538	0.99999	1	1	18875	0
PCID2	0.0008289	2.5898e-07	4e-06	1013	4	-2.0187	539	0.99917	1	1	18321	0
ARL2	0.00057539	2.5898e-07	4e-06	934	4	-2.0181	540	0.99508	1	1	17984	0
PSMD6	9.5235e-06	2.5898e-07	4e-06	222	4	-2.0173	541	0.99999	1	1	18916	0
LSM8	0.00093192	2.5898e-07	4e-06	1042	4	-2.0158	542	0.99506	1	1	17982	0
GPN1	4.4815e-05	2.5898e-07	4e-06	426	4	-2.015	543	0.99993	1	1	18678	0
PPTC7	0.00011886	2.5898e-07	4e-06	590	4	-2.0139	544	0.99988	1	1	18605	0
ALG14	0.00040497	2.5898e-07	4e-06	834	4	-2.0136	545	0.99717	1	1	18125	0
EEF1G	0.00037642	2.5898e-07	4e-06	821	4	-2.0132	546	0.99602	1	1	18044	0
SEH1L	0.0044624	4.9207e-06	6e-05	1556	4	-2.013	547	0.99424	0.99999	1	17936	0
ZNF830	0.00013939	2.5898e-07	4e-06	622	4	-2.0025	548	0.99986	1	1	18577	0
CDK1	3.3776e-06	2.5898e-07	4e-06	147	4	-2.0007	549	1	1	1	18985	0
RPL30	0.016708	0.00016808	0.001468	2186	3	-2.0005	550	0.36724	0.69761	1	6513	0
TIPIN	0.0013897	7.7695e-07	1.2e-05	1156	4	-1.9997	551	0.99116	0.99997	1	17808	0
DHX9	0.00048552	2.5898e-07	4e-06	879	4	-1.9981	552	0.99951	1	1	18410	0
PSMD7	3.1545e-05	2.5898e-07	4e-06	378	4	-1.9974	553	0.99997	1	1	18781	0
HARS	0.00035532	2.5898e-07	4e-06	804	4	-1.994	554	0.99964	1	1	18448	0
PPP1R2	0.0014785	7.7695e-07	1.2e-05	1175	4	-1.9933	555	0.97666	0.99971	1	17384	0
ATP5I	0.00066169	2.5898e-07	4e-06	974	4	-1.9929	556	0.99047	0.99996	1	17790	0
ERH	0.0010763	2.5898e-07	4e-06	1079	3	-1.9926	557	0.86125	0.9921	1	15106	0
ERCC2	1.1209e-06	2.5898e-07	4e-06	81	4	-1.991	558	1	1	1	19044	0
WDR3	0.00095309	2.5898e-07	4e-06	1050	4	-1.9909	559	0.99724	1	1	18127	0
PDPK1	0.00082726	2.5898e-07	4e-06	1012	4	-1.9902	560	0.99917	1	1	18322	0
CLNS1A	2.382e-05	2.5898e-07	4e-06	335	4	-1.9877	561	0.99998	1	1	18815	0
COPS4	0.00016109	2.5898e-07	4e-06	653	4	-1.986	562	0.99984	1	1	18547	0
NUTF2	0.0081627	2.5122e-05	0.000263	1814	3	-1.9828	563	0.7151	0.95433	1	12549	0
PPAN	0.00052594	2.5898e-07	4e-06	908	4	-1.9773	564	0.98992	0.99995	1	17775	0
HAUS4	6.6124e-05	2.5898e-07	4e-06	490	4	-1.9759	565	0.99993	1	1	18688	0
CHMP3	1.6077e-06	2.5898e-07	4e-06	95	3	-1.975	566	0.41423	0.76309	1	7340	0
RPL15	4.6655e-05	2.5898e-07	4e-06	434	4	-1.9726	567	0.99995	1	1	18731	0
ATP5D	6.9225e-07	2.5898e-07	4e-06	64	4	-1.9725	568	1	1	1	19058	0
RFC2	2.564e-06	2.5898e-07	4e-06	125	4	-1.9717	569	1	1	1	19006	0
KIF11	0.00036144	2.5898e-07	4e-06	812	4	-1.971	570	0.99964	1	1	18443	0
OR4F29	0.0044624	4.9207e-06	6e-05	1557	4	-1.9702	571	0.99087	0.99997	1	17800	0
TNPO1	0.00023026	2.5898e-07	4e-06	716	4	-1.9691	572	0.99952	1	1	18412	0
DDX21	0.0027485	2.3309e-06	3.2e-05	1376	3	-1.9674	573	0.95382	0.99902	1	16854	0
ECD	0.00015072	2.5898e-07	4e-06	636	4	-1.9666	574	0.99985	1	1	18564	0
NBPF20	0.0027547	2.3309e-06	3.2e-05	1377	2	-1.9665	575	0.079908	0.28414	1	1781	1
NOB1	0.00091252	2.5898e-07	4e-06	1038	4	-1.9657	576	0.99909	1	1	18306	0
LOC101060389	0.00026613	2.5898e-07	4e-06	742	4	-1.9637	577	0.97995	0.99977	1	17483	0
TEX10	0.0026271	1.8129e-06	2.5e-05	1356	3	-1.9623	578	0.95352	0.99902	1	16847	0
TSR2	0.0012179	2.5898e-07	4e-06	1115	4	-1.9597	579	0.99132	0.99998	1	17816	0
TUBG1	5.213e-05	2.5898e-07	4e-06	453	4	-1.9588	580	0.99995	1	1	18717	0
DDX18	0.00070715	2.5898e-07	4e-06	985	4	-1.9585	581	0.98334	0.99986	1	17584	0
FEN1	0.0011731	2.5898e-07	4e-06	1104	4	-1.9563	582	0.99744	1	1	18143	0
TOMM22	0.00025863	2.5898e-07	4e-06	737	4	-1.9561	583	0.99283	0.99998	1	17877	0
NDC1	4.7562e-08	2.5898e-07	4e-06	18	4	-1.9544	584	1	1	1	19100	0
TIMM13	1.0747e-05	2.5898e-07	4e-06	235	4	-1.9533	585	0.99999	1	1	18907	0
GINS4	4.8518e-05	2.5898e-07	4e-06	441	4	-1.9523	586	0.99994	1	1	18697	0
C19orf25	5.1625e-05	2.5898e-07	4e-06	451	4	-1.9459	587	0.99995	1	1	18719	0
RPS10	0.0005692	2.5898e-07	4e-06	930	3	-1.9446	588	0.95429	0.99902	1	16868	0
MED30	2.7612e-05	2.5898e-07	4e-06	358	4	-1.9438	589	0.99997	1	1	18796	0
TPT1	5.3615e-06	2.5898e-07	4e-06	179	4	-1.9362	590	0.99999	1	1	18954	0
PHAX	0.00024018	2.5898e-07	4e-06	723	4	-1.9336	591	0.99976	1	1	18500	0
TMEM41B	0.00055492	2.5898e-07	4e-06	919	4	-1.9315	592	0.99292	0.99999	1	17883	0
IARS	0.00050742	2.5898e-07	4e-06	892	4	-1.9305	593	0.99949	1	1	18401	0
DDX42	0.00014099	2.5898e-07	4e-06	623	4	-1.9303	594	0.99986	1	1	18576	0
CKAP5	1.5589e-05	2.5898e-07	4e-06	280	4	-1.9297	595	0.99998	1	1	18862	0
RPP30	0.00037423	2.5898e-07	4e-06	820	4	-1.9291	596	0.99933	1	1	18354	0
PGD	4.9835e-06	2.5898e-07	4e-06	174	4	-1.9273	597	1	1	1	18960	0
RARS	3.4236e-05	2.5898e-07	4e-06	390	4	-1.9272	598	0.99997	1	1	18772	0
LSG1	5.33e-06	2.5898e-07	4e-06	177	4	-1.9264	599	0.99999	1	1	18956	0
LRRC37A3	0.0018637	1.2949e-06	1.9e-05	1237	3	-1.9259	600	0.83698	0.98747	1	14661	0
HIST2H3A	0.00015376	2.5898e-07	4e-06	642	4	-1.923	601	0.99985	1	1	18559	0
NUF2	0.00025716	2.5898e-07	4e-06	735	4	-1.9199	602	0.95857	0.99924	1	16955	0
ACTR10	5.3357e-06	2.5898e-07	4e-06	178	4	-1.919	603	0.99999	1	1	18955	0
POLR3D	0.00017623	2.5898e-07	4e-06	666	4	-1.9179	604	0.99982	1	1	18537	0
PSMC4	0.00018126	2.5898e-07	4e-06	670	4	-1.9174	605	0.99982	1	1	18533	0
NPIPB6	0.00051087	2.5898e-07	4e-06	894	3	-1.9158	606	0.23507	0.49458	1	4213	1
SPC24	0.00072377	2.5898e-07	4e-06	989	4	-1.913	607	0.99928	1	1	18339	0
PSMA7	1.2767e-05	2.5898e-07	4e-06	261	4	-1.9123	608	0.99999	1	1	18879	0
ATP6V1D	0.0056496	9.0645e-06	0.000105	1645	4	-1.9117	609	0.98001	0.99977	1	17486	0
SYS1	8.3438e-05	2.5898e-07	4e-06	535	4	-1.9116	610	0.99992	1	1	18646	0
SF3B2	0.000201	2.5898e-07	4e-06	692	4	-1.9115	611	0.99083	0.99997	1	17797	0
ECT2	1.7546e-05	2.5898e-07	4e-06	295	4	-1.9104	612	0.99998	1	1	18851	0
C12orf45	0.00026665	2.5898e-07	4e-06	743	4	-1.9098	613	0.97658	0.99971	1	17381	0
UTP11L	6.9797e-05	2.5898e-07	4e-06	497	4	-1.9096	614	0.99993	1	1	18681	0
ARCN1	4.375e-05	2.5898e-07	4e-06	422	4	-1.9038	615	0.99951	1	1	18407	0
NPM1	0.002169	1.2949e-06	1.9e-05	1287	4	-1.9023	616	0.99579	1	1	18027	0
ANAPC5	0.00036526	2.5898e-07	4e-06	815	4	-1.8988	617	0.9906	0.99996	1	17793	0
MCM7	1.2866e-05	2.5898e-07	4e-06	262	4	-1.897	618	0.99999	1	1	18878	0
RBM28	0.00015911	2.5898e-07	4e-06	650	4	-1.897	619	0.99984	1	1	18549	0
PDCD2	0.00012672	2.5898e-07	4e-06	605	4	-1.8951	620	0.99987	1	1	18591	0
RUVBL2	0.00010017	2.5898e-07	4e-06	565	4	-1.8917	621	0.9999	1	1	18621	0
NHP2L1	0.0016273	7.7695e-07	1.2e-05	1203	4	-1.8915	622	0.99837	1	1	18218	0
RPL21	0.00012287	2.5898e-07	4e-06	599	4	-1.891	623	0.99985	1	1	18563	0
RPN2	0.0052762	8.5465e-06	0.000101	1617	4	-1.891	624	0.99472	0.99999	1	17960	0
PSMD4	1.2889e-05	2.5898e-07	4e-06	263	4	-1.8909	625	0.99999	1	1	18877	0
SART3	9.7064e-06	2.5898e-07	4e-06	223	4	-1.8839	626	0.99999	1	1	18915	0
DOLK	8.0501e-05	2.5898e-07	4e-06	525	4	-1.8831	627	0.99992	1	1	18655	0
POP7	9.6649e-05	2.5898e-07	4e-06	556	4	-1.8803	628	0.9999	1	1	18627	0
CCT3	2.2476e-05	2.5898e-07	4e-06	326	4	-1.8785	629	0.99998	1	1	18822	0
LARP1	3.2059e-05	2.5898e-07	4e-06	379	4	-1.8766	630	0.99997	1	1	18780	0
NAPG	0.0060182	1.1136e-05	0.000127	1672	4	-1.8763	631	0.95881	0.99924	1	16965	0
POLD3	2.6232e-05	2.5898e-07	4e-06	347	4	-1.8749	632	0.99997	1	1	18805	0
STX18	5.0331e-07	2.5898e-07	4e-06	58	4	-1.8716	633	0.99996	1	1	18743	0
NIPBL	0.0027658	2.3309e-06	3.2e-05	1379	3	-1.8715	634	0.85798	0.99165	1	15055	0
RBM39	0.00023487	2.5898e-07	4e-06	721	4	-1.8711	635	0.99813	1	1	18200	0
AQR	1.3214e-05	2.5898e-07	4e-06	264	4	-1.8672	636	0.99999	1	1	18876	0
NUPL1	1.0252e-05	2.5898e-07	4e-06	228	4	-1.8656	637	0.99999	1	1	18911	0
MCAT	1.6328e-05	2.5898e-07	4e-06	287	4	-1.8642	638	0.97693	0.99971	1	17396	0
DNAJC11	3.2103e-05	2.5898e-07	4e-06	380	4	-1.863	639	0.99997	1	1	18779	0
MBTPS1	2.6479e-05	2.5898e-07	4e-06	351	4	-1.8627	640	0.99997	1	1	18803	0
NPIPA2	0.00078144	2.5898e-07	4e-06	1004	3	-1.8626	641	0.26476	0.54173	1	4722	0
NDNL2	0.00013807	2.5898e-07	4e-06	618	4	-1.86	642	0.99986	1	1	18580	0
RBM22	0.00036281	2.5898e-07	4e-06	813	3	-1.8583	643	0.75576	0.96813	1	13218	0
GUK1	0.00064933	2.5898e-07	4e-06	966	4	-1.8567	644	0.99935	1	1	18358	0
ISCU	1.6804e-05	2.5898e-07	4e-06	292	3	-1.8562	645	0.95633	0.99912	1	16907	0
DNAJC17	1.7555e-06	2.5898e-07	4e-06	101	4	-1.8548	646	1	1	1	19026	0
PRPF4	0.0054952	9.0645e-06	0.000105	1629	4	-1.8546	647	0.98389	0.99986	1	17602	0
RPL14	0.011149	8.4688e-05	0.000828	1953	2	-1.8524	648	0.36592	0.69761	1	6485	0
NOM1	0.00041563	2.5898e-07	4e-06	842	4	-1.8518	649	0.99958	1	1	18428	0
SUPT5H	1.8635e-05	2.5898e-07	4e-06	304	4	-1.8509	650	0.99998	1	1	18843	0
TTC1	3.0823e-05	2.5898e-07	4e-06	373	4	-1.8494	651	0.99997	1	1	18786	0
VPS28	6.1963e-05	2.5898e-07	4e-06	479	4	-1.8463	652	0.99987	1	1	18586	0
DDX46	0.0023857	1.2949e-06	1.9e-05	1317	3	-1.8452	653	0.94123	0.99858	1	16591	0
BANP	0.0010059	2.5898e-07	4e-06	1060	3	-1.8447	654	0.55423	0.87323	1	9759	0
PMPCA	0.00090214	2.5898e-07	4e-06	1034	3	-1.8443	655	0.90309	0.99611	1	15863	0
PSMG4	0.0025087	1.8129e-06	2.5e-05	1338	3	-1.8435	656	0.22283	0.47219	1	4006	1
KAT8	0.008429	2.5122e-05	0.000263	1822	3	-1.8432	657	0.87023	0.99293	1	15281	0
DIMT1	6.3549e-05	2.5898e-07	4e-06	482	4	-1.8421	658	0.99994	1	1	18695	0
LSM5	7.7727e-06	2.5898e-07	4e-06	208	4	-1.8419	659	0.99999	1	1	18929	0
MRPS14	0.00088226	2.5898e-07	4e-06	1028	3	-1.8418	660	0.52311	0.84794	1	9212	0
PSMC2	0.00011819	2.5898e-07	4e-06	588	4	-1.8416	661	0.99988	1	1	18606	0
EXOSC2	0.001094	2.5898e-07	4e-06	1084	4	-1.8412	662	0.99619	1	1	18055	0
SAP18	0.00092682	2.5898e-07	4e-06	1041	4	-1.8406	663	0.99476	0.99999	1	17963	0
FDXR	0.0021528	1.2949e-06	1.9e-05	1283	4	-1.8405	664	0.97992	0.99977	1	17482	0
MAEA	4.6327e-08	2.5898e-07	4e-06	15	4	-1.8402	665	1	1	1	19102	0
DNMT1	0.0019114	1.2949e-06	1.9e-05	1246	3	-1.8372	666	0.90912	0.99647	1	15980	0
CSK	8.6084e-05	2.5898e-07	4e-06	539	4	-1.8357	667	0.99991	1	1	18644	0
TBC1D3F	0.0012131	2.5898e-07	4e-06	1112	4	-1.8321	668	0.97115	0.99957	1	17243	0
RPS15	0.0040068	4.4027e-06	5.5e-05	1511	3	-1.8285	669	0.15809	0.38237	1	2969	1
C3orf38	0.0085458	2.7711e-05	0.00029	1827	3	-1.8266	670	0.93937	0.9985	1	16551	0
UPF1	0.0026795	1.8129e-06	2.5e-05	1361	3	-1.8228	671	0.49187	0.82969	1	8669	0
BANF1	2.7995e-05	2.5898e-07	4e-06	361	4	-1.8218	672	0.97862	0.99975	1	17440	0
RPL38	0.0010959	2.5898e-07	4e-06	1086	4	-1.8202	673	0.97945	0.99977	1	17463	0
PGK1	1.0599e-06	2.5898e-07	4e-06	78	4	-1.8197	674	1	1	1	19047	0
SON	0.0002832	2.5898e-07	4e-06	755	4	-1.8178	675	0.99928	1	1	18341	0
FNTB	0.0018753	1.2949e-06	1.9e-05	1238	4	-1.814	676	0.9965	1	1	18075	0
COPB1	0.00024671	2.5898e-07	4e-06	730	3	-1.8117	677	0.66269	0.93126	1	11656	0
RBX1	0.00014176	2.5898e-07	4e-06	625	4	-1.811	678	0.99986	1	1	18574	0
CHAF1B	6.3807e-05	2.5898e-07	4e-06	484	4	-1.8108	679	0.99994	1	1	18693	0
SF3B1	0.0004676	2.5898e-07	4e-06	869	4	-1.8075	680	0.99953	1	1	18416	0
FCF1	0.0027393	2.3309e-06	3.2e-05	1374	4	-1.8074	681	0.99609	1	1	18046	0
POLRMT	4.5898e-05	2.5898e-07	4e-06	430	3	-1.8071	682	0.2345	0.49458	1	4205	1
MED12	0.00019123	2.5898e-07	4e-06	682	3	-1.8061	683	0.95224	0.99899	1	16816	0
CDC16	3.8396e-05	2.5898e-07	4e-06	403	3	-1.8046	684	0.75049	0.96601	1	13140	0
POLR1A	0.003365	3.3668e-06	4.4e-05	1451	4	-1.8046	685	0.99663	1	1	18083	0
NUP88	0.0034017	3.3668e-06	4.4e-05	1456	3	-1.8043	686	0.73839	0.96032	1	12946	0
RBBP6	0.00011714	2.5898e-07	4e-06	587	4	-1.8035	687	0.99988	1	1	18607	0
PGS1	8.0963e-05	2.5898e-07	4e-06	527	4	-1.7994	688	0.99992	1	1	18653	0
CTR9	3.2308e-05	2.5898e-07	4e-06	381	3	-1.7985	689	0.3863	0.72593	1	6843	0
PLK4	0.00012525	2.5898e-07	4e-06	604	4	-1.7973	690	0.99987	1	1	18592	0
PPRC1	0.00016258	2.5898e-07	4e-06	656	4	-1.7948	691	0.99984	1	1	18545	0
XRCC5	0.00055818	2.5898e-07	4e-06	923	4	-1.7945	692	0.99433	0.99999	1	17942	0
WDR43	0.0002737	2.5898e-07	4e-06	749	3	-1.7928	693	0.78595	0.97503	1	13724	0
RPS7	0.0034495	3.8848e-06	4.9e-05	1460	4	-1.791	694	0.98619	0.99991	1	17662	0
RFC5	0.00022624	2.5898e-07	4e-06	713	4	-1.7908	695	0.99977	1	1	18506	0
TELO2	1.9499e-06	2.5898e-07	4e-06	107	4	-1.7897	696	1	1	1	19020	0
PPP1R12A	0.00083226	2.5898e-07	4e-06	1014	4	-1.7879	697	0.99185	0.99998	1	17834	0
POLR2E	0.00038051	2.5898e-07	4e-06	824	3	-1.7878	698	0.22693	0.47897	1	4076	1
CDC45	0.00014627	2.5898e-07	4e-06	630	4	-1.7854	699	0.99985	1	1	18570	0
WDR33	0.00030235	2.5898e-07	4e-06	769	4	-1.7841	700	0.9997	1	1	18473	0
NUDCD3	8.5187e-05	2.5898e-07	4e-06	537	3	-1.7816	701	0.59707	0.90401	1	10509	0
EIF3A	0.00034168	2.5898e-07	4e-06	796	4	-1.7812	702	0.99966	1	1	18453	0
KAT5	0.0054478	9.0645e-06	0.000105	1624	3	-1.779	703	0.95168	0.99894	1	16807	0
HAUS8	0.00069503	2.5898e-07	4e-06	979	4	-1.7772	704	0.9993	1	1	18349	0
MRPS34	4.8056e-05	2.5898e-07	4e-06	439	4	-1.7765	705	0.99995	1	1	18728	0
CDC37	0.0082487	2.5122e-05	0.000263	1818	4	-1.7764	706	0.99175	0.99998	1	17830	0
SRPR	0.00034468	2.5898e-07	4e-06	798	4	-1.7754	707	0.99966	1	1	18452	0
FARSB	0.0011051	2.5898e-07	4e-06	1088	3	-1.7734	708	0.03826	0.21707	1	1198	1
HCFC1	0.0035777	3.8848e-06	4.9e-05	1472	4	-1.7724	709	0.99642	1	1	18071	0
DCTN1	7.9115e-05	2.5898e-07	4e-06	519	3	-1.7708	710	0.74526	0.9644	1	13047	0
PSMA2	0.0027225	2.3309e-06	3.2e-05	1367	3	-1.7704	711	0.12225	0.33107	1	2409	1
RBBP5	0.0042447	4.4027e-06	5.5e-05	1538	3	-1.7696	712	0.90052	0.99605	1	15816	0
SPDYE2B	0.0032559	2.8488e-06	3.8e-05	1430	4	-1.7677	713	0.99238	0.99998	1	17859	0
SKA2	2.4278e-06	2.5898e-07	4e-06	122	4	-1.7675	714	1	1	1	19007	0
GINS3	0.0027336	2.3309e-06	3.2e-05	1372	3	-1.7674	715	0.82677	0.98426	1	14487	0
ILF2	8.4368e-05	2.5898e-07	4e-06	536	4	-1.7673	716	0.98366	0.99986	1	17592	0
EMG1	1.5485e-06	2.5898e-07	4e-06	94	4	-1.7659	717	1	1	1	19032	0
HINFP	0.00092343	2.5898e-07	4e-06	1039	4	-1.7584	718	0.99388	0.99999	1	17919	0
MRPL33	0.0028628	2.3309e-06	3.2e-05	1391	3	-1.7584	719	0.93022	0.99807	1	16375	0
RSL24D1	3.8301e-05	2.5898e-07	4e-06	402	4	-1.7564	720	0.99996	1	1	18759	0
TPR	1.9807e-05	2.5898e-07	4e-06	314	4	-1.7546	721	0.9996	1	1	18435	0
UBIAD1	0.00019832	2.5898e-07	4e-06	691	4	-1.7535	722	0.99849	1	1	18232	0
MLST8	9.1421e-05	2.5898e-07	4e-06	546	4	-1.7527	723	0.99991	1	1	18637	0
VBP1	0.0020337	1.2949e-06	1.9e-05	1266	4	-1.7527	724	0.99183	0.99998	1	17833	0
PPA2	0.0018833	1.2949e-06	1.9e-05	1239	4	-1.7523	725	0.99812	1	1	18199	0
KAT7	0.0002107	2.5898e-07	4e-06	701	4	-1.7512	726	0.99979	1	1	18516	0
NUP35	7.8608e-05	2.5898e-07	4e-06	516	4	-1.7476	727	0.99992	1	1	18662	0
POP5	0.00010871	2.5898e-07	4e-06	575	4	-1.7468	728	0.99989	1	1	18614	0
DTL	0.0042056	4.4027e-06	5.5e-05	1535	4	-1.7454	729	0.97711	0.99971	1	17405	0
MFAP1	0.00012252	2.5898e-07	4e-06	597	4	-1.7434	730	0.99988	1	1	18596	0
SARS	0.00093306	2.5898e-07	4e-06	1043	3	-1.7417	731	0.80945	0.98077	1	14153	0
EAF1	0.012512	8.8314e-05	0.000839	2013	3	-1.7411	732	0.94584	0.99879	1	16673	0
HIST2H3C	0.00021927	2.5898e-07	4e-06	708	4	-1.739	733	0.99978	1	1	18510	0
WEE1	0.0001878	2.5898e-07	4e-06	679	4	-1.7377	734	0.99981	1	1	18527	0
NUP62	0.0017605	7.7695e-07	1.2e-05	1216	4	-1.7371	735	0.99824	1	1	18210	0
SPC25	0.010948	8.0026e-05	0.000786	1942	3	-1.7357	736	0.88364	0.99446	1	15514	0
UTP20	1.1051e-05	2.5898e-07	4e-06	238	4	-1.7354	737	0.99999	1	1	18903	0
TKT	4.0359e-08	2.5898e-07	4e-06	11	4	-1.7329	738	1	1	1	19106	0
SSU72	0.0015253	7.7695e-07	1.2e-05	1185	4	-1.7326	739	0.99847	1	1	18227	0
RPTOR	0.00025821	2.5898e-07	4e-06	736	4	-1.7309	740	0.99974	1	1	18491	0
MRPS21	2.7524e-05	2.5898e-07	4e-06	357	4	-1.7308	741	0.99997	1	1	18797	0
LETM1	0.005147	8.5465e-06	0.000101	1603	4	-1.7286	742	0.99485	0.99999	1	17971	0
DIEXF	0.00020998	2.5898e-07	4e-06	700	4	-1.7285	743	0.99979	1	1	18517	0
NBPF9	0.0043554	4.9207e-06	6e-05	1545	3	-1.719	744	0.52817	0.85265	1	9302	0
DDOST	1.5631e-05	2.5898e-07	4e-06	281	4	-1.7187	745	0.99995	1	1	18726	0
PSMB1	3.136e-05	2.5898e-07	4e-06	377	4	-1.7181	746	0.99997	1	1	18782	0
FIP1L1	0.00069583	2.5898e-07	4e-06	981	4	-1.718	747	0.96007	0.99933	1	16988	0
COPA	5.7662e-05	2.5898e-07	4e-06	468	4	-1.7169	748	0.99994	1	1	18707	0
RNF113A	7.057e-05	2.5898e-07	4e-06	498	4	-1.7165	749	0.99993	1	1	18680	0
SLMO2	9.5871e-05	2.5898e-07	4e-06	553	4	-1.7161	750	0.9999	1	1	18631	0
PLA2G10	0.0077042	2.4604e-05	0.000261	1791	4	-1.7129	751	0.9923	0.99998	1	17853	0
RPS14	0.00060991	2.5898e-07	4e-06	952	4	-1.7107	752	0.99939	1	1	18368	0
TBC1D3H	0.0030276	2.3309e-06	3.2e-05	1403	4	-1.7104	753	0.99258	0.99998	1	17869	0
WDHD1	0.0031498	2.8488e-06	3.8e-05	1419	3	-1.7099	754	0.90918	0.99647	1	15981	0
NUDC	0.0019034	1.2949e-06	1.9e-05	1243	4	-1.7094	755	0.9981	1	1	18196	0
SUPT16H	0.0011994	2.5898e-07	4e-06	1109	3	-1.7086	756	0.7359	0.95962	1	12898	0
ALG1	1.1271e-05	2.5898e-07	4e-06	241	4	-1.7083	757	0.99999	1	1	18899	0
COG4	6.3476e-05	2.5898e-07	4e-06	481	4	-1.7052	758	0.99994	1	1	18696	0
SRP68	0.011552	8.676e-05	0.000839	1967	4	-1.7042	759	0.96528	0.99947	1	17104	0
AGAP4	0.0006988	2.5898e-07	4e-06	983	4	-1.7031	760	0.9993	1	1	18346	0
NCAPG	2.0868e-05	2.5898e-07	4e-06	319	4	-1.7016	761	0.99998	1	1	18829	0
OR7E24	0.02448	0.00035559	0.002699	2509	3	-1.701	762	0.61522	0.91391	1	10825	0
CTU2	0.00015426	2.5898e-07	4e-06	643	4	-1.7008	763	0.99985	1	1	18558	0
SRP19	0.00024632	2.5898e-07	4e-06	729	4	-1.7003	764	0.99975	1	1	18495	0
POLR2F	0.00056358	2.5898e-07	4e-06	926	4	-1.7003	765	0.99944	1	1	18381	0
ATXN10	9.6046e-05	2.5898e-07	4e-06	554	4	-1.6999	766	0.9999	1	1	18630	0
EIF4G1	0.00085514	2.5898e-07	4e-06	1021	4	-1.6976	767	0.98448	0.99987	1	17616	0
ZNRD1	3.3514e-05	2.5898e-07	4e-06	388	4	-1.6972	768	0.99997	1	1	18774	0
SF3A3	0.00075905	2.5898e-07	4e-06	998	4	-1.6962	769	0.99924	1	1	18332	0
DHX36	0.00030257	2.5898e-07	4e-06	770	4	-1.6944	770	0.99325	0.99999	1	17895	0
EIF4E	1.1341e-05	2.5898e-07	4e-06	244	4	-1.6919	771	0.99999	1	1	18896	0
GEMIN7	0.00049985	2.5898e-07	4e-06	890	4	-1.6913	772	0.95935	0.99928	1	16976	0
TTC27	0.00084031	2.5898e-07	4e-06	1015	4	-1.6908	773	0.99916	1	1	18320	0
DDX6	0.0011102	2.5898e-07	4e-06	1091	4	-1.6899	774	0.98589	0.99991	1	17654	0
CHURC1-FNTB	0.00017716	2.5898e-07	4e-06	667	3	-1.6894	775	0.092413	0.2997	1	1963	1
POP1	5.4574e-05	2.5898e-07	4e-06	461	3	-1.6883	776	0.51073	0.83898	1	9006	0
RABGGTB	7.2612e-06	2.5898e-07	4e-06	203	4	-1.6874	777	0.99999	1	1	18934	0
SRBD1	0.0008155	2.5898e-07	4e-06	1009	4	-1.687	778	0.97391	0.99964	1	17309	0
SARS2	0.00035766	2.5898e-07	4e-06	807	4	-1.6866	779	0.99964	1	1	18446	0
BUB1B	0.0013462	7.7695e-07	1.2e-05	1150	4	-1.6859	780	0.99618	1	1	18051	0
UTP18	0.00062824	2.5898e-07	4e-06	961	4	-1.6831	781	0.96805	0.99953	1	17172	0
BTF3	8.7428e-06	2.5898e-07	4e-06	212	4	-1.6823	782	0.99999	1	1	18924	0
EIF2S2	0.00020466	2.5898e-07	4e-06	696	4	-1.6813	783	0.9998	1	1	18520	0
MTOR	0.010853	7.9508e-05	0.000783	1941	4	-1.6804	784	0.98915	0.99993	1	17751	0
INTS5	5.634e-05	2.5898e-07	4e-06	464	4	-1.68	785	0.99994	1	1	18710	0
EMC3	0.0001386	2.5898e-07	4e-06	620	3	-1.6793	786	0.95284	0.99902	1	16834	0
NELFA	0.00027074	2.5898e-07	4e-06	748	4	-1.6782	787	0.99973	1	1	18486	0
TLN1	0.0014342	7.7695e-07	1.2e-05	1164	4	-1.6779	788	0.99857	1	1	18241	0
POLA1	0.0012676	2.5898e-07	4e-06	1133	4	-1.6764	789	0.99873	1	1	18261	0
PDCD11	4.4002e-05	2.5898e-07	4e-06	423	4	-1.6762	790	0.99996	1	1	18739	0
RTFDC1	0.0090374	3.3409e-05	0.000345	1853	3	-1.6759	791	0.40884	0.7508	1	7245	0
OSBP	9.2245e-05	2.5898e-07	4e-06	547	4	-1.6756	792	0.99991	1	1	18636	0
KIF4A	0.001743	7.7695e-07	1.2e-05	1214	3	-1.6756	793	0.91299	0.99691	1	16054	0
GABPA	3.8251e-05	2.5898e-07	4e-06	401	4	-1.6749	794	0.99996	1	1	18760	0
SDAD1	0.014522	0.00013079	0.001181	2101	4	-1.673	795	0.98457	0.99987	1	17618	0
XAB2	0.0010818	2.5898e-07	4e-06	1083	4	-1.6724	796	0.99892	1	1	18283	0
PSTK	0.00013683	2.5898e-07	4e-06	614	4	-1.6711	797	0.98237	0.99982	1	17553	0
GLE1	0.008696	2.9265e-05	0.000304	1837	3	-1.6704	798	0.93165	0.99818	1	16411	0
RPS10-NUDT3	0.018374	0.00022558	0.001885	2277	3	-1.6676	799	0.87841	0.99378	1	15433	0
DGCR8	0.0012204	2.5898e-07	4e-06	1116	4	-1.6667	800	0.98146	0.9998	1	17523	0
RNPS1	7.7485e-05	2.5898e-07	4e-06	513	3	-1.6662	801	0.88953	0.99494	1	15614	0
ISY1	0.00020308	2.5898e-07	4e-06	695	4	-1.6661	802	0.99929	1	1	18344	0
NCAPD3	0.00015671	2.5898e-07	4e-06	646	4	-1.6654	803	0.99984	1	1	18554	0
RPL39	0.00030651	2.5898e-07	4e-06	773	4	-1.664	804	0.99969	1	1	18472	0
CDC20	0.0036532	3.8848e-06	4.9e-05	1480	4	-1.6619	805	0.9843	0.99986	1	17609	0
MIS18BP1	3.0716e-05	2.5898e-07	4e-06	371	4	-1.6612	806	0.99997	1	1	18788	0
DR1	0.00045133	2.5898e-07	4e-06	860	3	-1.6602	807	0.84416	0.98904	1	14809	0
2022-09-07	4.961e-05	2.5898e-07	4e-06	444	4	-1.6594	808	0.99995	1	1	18724	0
CDCA5	0.0017983	7.7695e-07	1.2e-05	1225	4	-1.6592	809	0.99604	1	1	18045	0
ARPC4	2.9685e-05	2.5898e-07	4e-06	369	4	-1.659	810	0.99997	1	1	18790	0
RTCB	4.1865e-05	2.5898e-07	4e-06	415	4	-1.6571	811	0.99996	1	1	18747	0
DDX5	0.0033662	3.3668e-06	4.4e-05	1452	4	-1.6542	812	0.98694	0.99992	1	17689	0
INTS7	0.01476	0.00013079	0.001181	2114	4	-1.6528	813	0.98524	0.99989	1	17638	0
CPSF2	0.0027954	2.3309e-06	3.2e-05	1384	4	-1.6521	814	0.96144	0.99937	1	17028	0
ABCE1	0.0013987	7.7695e-07	1.2e-05	1159	4	-1.649	815	0.99734	1	1	18134	0
C3orf17	5.7691e-05	2.5898e-07	4e-06	469	4	-1.6487	816	0.99574	1	1	18023	0
WBSCR22	0.0005437	2.5898e-07	4e-06	914	4	-1.6486	817	0.99582	1	1	18030	0
TOMM40	0.00027063	2.5898e-07	4e-06	747	4	-1.6463	818	0.99973	1	1	18487	0
TUBGCP4	0.0019839	1.2949e-06	1.9e-05	1258	3	-1.6439	819	0.69608	0.94592	1	12222	0
HNRNPH1	1.1081e-05	2.5898e-07	4e-06	239	4	-1.6438	820	0.99999	1	1	18902	0
SKA3	0.0004296	2.5898e-07	4e-06	847	3	-1.6435	821	0.87608	0.99341	1	15386	0
IKBKAP	0.00035703	2.5898e-07	4e-06	806	4	-1.6428	822	0.99961	1	1	18437	0
ASCC3	0.0013978	7.7695e-07	1.2e-05	1158	3	-1.6417	823	0.41209	0.75629	1	7307	0
CHMP4B	0.0025698	1.8129e-06	2.5e-05	1349	4	-1.6415	824	0.99743	1	1	18140	0
CENPN	4.7566e-05	2.5898e-07	4e-06	438	4	-1.6408	825	0.99995	1	1	18729	0
RRP7A	0.00053103	2.5898e-07	4e-06	910	4	-1.6403	826	0.98513	0.99989	1	17634	0
DDX41	0.00023071	2.5898e-07	4e-06	718	4	-1.64	827	0.99967	1	1	18458	0
PAK1IP1	0.0036111	3.8848e-06	4.9e-05	1477	4	-1.6396	828	0.99639	1	1	18068	0
HSD17B12	0.00047171	2.5898e-07	4e-06	874	3	-1.6387	829	0.41798	0.76855	1	7412	0
PPAN-P2RY11	0.0032764	2.8488e-06	3.8e-05	1436	3	-1.6385	830	0.91311	0.99691	1	16055	0
ALG1L2	0.0098421	5.102e-05	0.000516	1890	3	-1.6354	831	0.92995	0.99804	1	16371	0
CSNK2B	0.0013706	7.7695e-07	1.2e-05	1153	3	-1.6339	832	0.41007	0.7522	1	7268	0
ZNF207	0.00057085	2.5898e-07	4e-06	932	4	-1.6324	833	0.98875	0.99993	1	17742	0
METAP2	8.6965e-05	2.5898e-07	4e-06	540	4	-1.6316	834	0.99991	1	1	18643	0
CCDC174	0.0047622	6.9926e-06	8.4e-05	1577	3	-1.6284	835	0.16124	0.39132	1	3015	1
OXA1L	0.00061474	2.5898e-07	4e-06	953	4	-1.6271	836	0.99939	1	1	18366	0
UBA2	0.00043251	2.5898e-07	4e-06	849	4	-1.6246	837	0.99932	1	1	18351	0
KIF18A	0.0031021	2.8488e-06	3.8e-05	1414	4	-1.6237	838	0.9969	1	1	18102	0
YPEL5	0.00020121	2.5898e-07	4e-06	693	4	-1.6236	839	0.98556	0.99991	1	17648	0
USP17L11	0.0028728	2.3309e-06	3.2e-05	1394	4	-1.6227	840	0.99713	1	1	18120	0
C1orf131	0.0028474	2.3309e-06	3.2e-05	1388	4	-1.6225	841	0.99502	0.99999	1	17980	0
TRMT5	2.6192e-05	2.5898e-07	4e-06	346	3	-1.6223	842	0.72464	0.95745	1	12711	0
RRP9	0.0010774	2.5898e-07	4e-06	1082	4	-1.6207	843	0.99784	1	1	18181	0
U2SURP	0.00049309	2.5898e-07	4e-06	884	3	-1.6195	844	0.95596	0.99909	1	16899	0
WDR82	0.00034212	2.5898e-07	4e-06	797	3	-1.6194	845	0.49022	0.82861	1	8643	0
CCAR1	4.3218e-06	2.5898e-07	4e-06	165	4	-1.6193	846	1	1	1	18968	0
HUWE1	9.8282e-06	2.5898e-07	4e-06	224	4	-1.6191	847	0.99999	1	1	18914	0
WDR83	4.9886e-05	2.5898e-07	4e-06	445	4	-1.6182	848	0.99995	1	1	18723	0
KTI12	9.7255e-05	2.5898e-07	4e-06	557	4	-1.6182	849	0.9999	1	1	18626	0
MRPL17	6.7537e-05	2.5898e-07	4e-06	493	4	-1.6168	850	0.99993	1	1	18685	0
LONP1	1.133e-05	2.5898e-07	4e-06	243	3	-1.6162	851	0.082962	0.28641	1	1829	1
IK	8.0589e-05	2.5898e-07	4e-06	526	4	-1.6152	852	0.99992	1	1	18654	0
CDK9	0.00052065	2.5898e-07	4e-06	902	4	-1.6143	853	0.99948	1	1	18395	0
YKT6	0.00043162	2.5898e-07	4e-06	848	3	-1.614	854	0.75751	0.96872	1	13243	0
PRR20D	0.00069547	2.5898e-07	4e-06	980	4	-1.612	855	0.9993	1	1	18348	0
KANSL2	0.00012258	2.5898e-07	4e-06	598	4	-1.6107	856	0.99988	1	1	18595	0
NUP205	0.00055793	2.5898e-07	4e-06	921	4	-1.6104	857	0.99944	1	1	18385	0
DDX52	0.00054489	2.5898e-07	4e-06	915	4	-1.6099	858	0.99084	0.99997	1	17799	0
TAF2	0.0027313	2.3309e-06	3.2e-05	1370	3	-1.6095	859	0.62901	0.91944	1	11062	0
POLA2	3.6937e-05	2.5898e-07	4e-06	397	4	-1.6092	860	0.99996	1	1	18764	0
TAF1B	0.00014364	2.5898e-07	4e-06	628	4	-1.6074	861	0.99986	1	1	18571	0
MRPL43	0.0024057	1.8129e-06	2.5e-05	1320	3	-1.6073	862	0.086104	0.2908	1	1875	1
TRAPPC3	0.014829	0.00013131	0.001181	2116	3	-1.6062	863	0.11963	0.32884	1	2367	1
EIF5A	0.021749	0.00031104	0.002465	2401	3	-1.6062	864	0.92767	0.99797	1	16323	0
DTYMK	4.2054e-05	2.5898e-07	4e-06	416	4	-1.6056	865	0.99996	1	1	18746	0
PLRG1	9.9757e-05	2.5898e-07	4e-06	563	4	-1.6051	866	0.9999	1	1	18623	0
RPS19BP1	0.00028463	2.5898e-07	4e-06	757	4	-1.6038	867	0.99972	1	1	18480	0
SRP14	0.00021548	2.5898e-07	4e-06	706	4	-1.6022	868	0.99978	1	1	18513	0
CSTF3	0.00059126	2.5898e-07	4e-06	945	4	-1.6014	869	0.99792	1	1	18185	0
CCDC86	0.00018255	2.5898e-07	4e-06	672	4	-1.5997	870	0.99982	1	1	18532	0
PUF60	0.00010414	2.5898e-07	4e-06	570	4	-1.5987	871	0.98483	0.99988	1	17623	0
MRPL38	0.0013048	2.5898e-07	4e-06	1139	4	-1.5973	872	0.9987	1	1	18256	0
HNRNPK	0.00037392	2.5898e-07	4e-06	819	3	-1.5956	873	0.87511	0.99322	1	15370	0
HIST1H2AI	0.0033557	3.3668e-06	4.4e-05	1449	4	-1.5952	874	0.97571	0.99971	1	17351	0
XPO5	0.00011066	2.5898e-07	4e-06	578	4	-1.594	875	0.99947	1	1	18390	0
DDX55	0.0024556	1.8129e-06	2.5e-05	1332	3	-1.5935	876	0.69536	0.94452	1	12212	0
NCAPD2	0.0001165	2.5898e-07	4e-06	586	4	-1.5926	877	0.99988	1	1	18608	0
EMC7	0.0052767	8.5465e-06	0.000101	1618	3	-1.592	878	0.93546	0.99837	1	16464	0
RSL1D1	0.00053087	2.5898e-07	4e-06	909	4	-1.5916	879	0.99947	1	1	18389	0
CHD4	5.0224e-05	2.5898e-07	4e-06	447	4	-1.5913	880	0.99995	1	1	18722	0
DHX8	0.0011427	2.5898e-07	4e-06	1095	4	-1.5895	881	0.99886	1	1	18275	0
ANAPC15	0.0012226	2.5898e-07	4e-06	1118	3	-1.5892	882	0.90709	0.99635	1	15941	0
PGGT1B	0.0051565	8.5465e-06	0.000101	1605	3	-1.5876	883	0.5382	0.85916	1	9486	0
TFIP11	0.00065356	2.5898e-07	4e-06	969	4	-1.5867	884	0.99878	1	1	18267	0
BAP1	0.00052243	2.5898e-07	4e-06	903	4	-1.5858	885	0.99948	1	1	18393	0
RRP12	0.023856	0.00035559	0.002699	2477	3	-1.5851	886	0.93691	0.99837	1	16499	0
MSL1	3.078e-05	2.5898e-07	4e-06	372	4	-1.584	887	0.99997	1	1	18787	0
RPN1	0.00067714	2.5898e-07	4e-06	976	4	-1.5834	888	0.97035	0.99957	1	17226	0
TFDP1	0.00027612	2.5898e-07	4e-06	753	4	-1.5807	889	0.99972	1	1	18482	0
PWP1	4.5186e-05	2.5898e-07	4e-06	428	4	-1.5801	890	0.99995	1	1	18735	0
HNRNPA1	0.00053522	2.5898e-07	4e-06	911	4	-1.5797	891	0.99946	1	1	18388	0
GTF3A	0.0039077	4.4027e-06	5.5e-05	1507	3	-1.5793	892	0.8238	0.98372	1	14416	0
SETD8	0.018398	0.00022558	0.001885	2281	3	-1.5777	893	0.066097	0.26189	1	1593	1
COG3	0.00016561	2.5898e-07	4e-06	660	4	-1.5762	894	0.9991	1	1	18307	0
PKM	0.0011411	2.5898e-07	4e-06	1094	4	-1.5744	895	0.99886	1	1	18276	0
ALG11	0.01814	0.00022506	0.001885	2263	4	-1.5731	896	0.98186	0.99981	1	17535	0
RAD51C	0.00034572	2.5898e-07	4e-06	799	4	-1.5725	897	0.99965	1	1	18451	0
TINF2	0.0041112	4.4027e-06	5.5e-05	1524	4	-1.572	898	0.99355	0.99999	1	17910	0
NSMCE4A	0.013979	0.00011162	0.001023	2086	3	-1.5708	899	0.86244	0.9921	1	15130	0
CHORDC1	0.0012138	2.5898e-07	4e-06	1113	3	-1.5691	900	0.72373	0.9567	1	12694	0
KDM8	0.0012652	2.5898e-07	4e-06	1131	3	-1.5687	901	0.53527	0.85638	1	9432	0
ADAT2	0.00031689	2.5898e-07	4e-06	782	3	-1.5667	902	0.8382	0.98776	1	14688	0
USP7	5.1266e-06	2.5898e-07	4e-06	176	4	-1.5666	903	0.99999	1	1	18957	0
TACC3	4.9167e-05	2.5898e-07	4e-06	443	4	-1.5664	904	0.99975	1	1	18492	0
CENPW	0.0010428	2.5898e-07	4e-06	1070	4	-1.5642	905	0.99896	1	1	18290	0
SNW1	3.9472e-05	2.5898e-07	4e-06	407	4	-1.561	906	0.99996	1	1	18753	0
DGCR14	0.0023624	1.2949e-06	1.9e-05	1312	4	-1.5586	907	0.99764	1	1	18169	0
RFC1	0.0075683	2.4604e-05	0.000261	1776	4	-1.5579	908	0.96771	0.99953	1	17164	0
RPUSD4	3.7528e-05	2.5898e-07	4e-06	398	4	-1.5569	909	0.99996	1	1	18763	0
ANAPC13	0.00042024	2.5898e-07	4e-06	844	4	-1.5566	910	0.99958	1	1	18427	0
NOL12	8.3348e-05	2.5898e-07	4e-06	533	4	-1.5562	911	0.99992	1	1	18648	0
BRAT1	0.011241	8.5206e-05	0.00083	1959	3	-1.5562	912	0.82713	0.98442	1	14493	0
U2AF2	0.021958	0.00031104	0.002465	2409	3	-1.5557	913	0.9439	0.9987	1	16639	0
RPAP2	0.00075881	2.5898e-07	4e-06	997	4	-1.5544	914	0.99924	1	1	18333	0
TSR1	0.0012541	2.5898e-07	4e-06	1127	4	-1.5538	915	0.9953	1	1	17998	0
TOMM20	7.5235e-05	2.5898e-07	4e-06	508	4	-1.5494	916	0.99992	1	1	18667	0
MED14	0.0002121	2.5898e-07	4e-06	702	4	-1.5481	917	0.99979	1	1	18515	0
TAMM41	0.00082438	2.5898e-07	4e-06	1011	4	-1.5458	918	0.99627	1	1	18059	0
GTF2H1	2.1238e-05	2.5898e-07	4e-06	322	4	-1.5452	919	0.99998	1	1	18826	0
RBBP8	0.00052244	2.5898e-07	4e-06	904	3	-1.5425	920	0.8719	0.99303	1	15316	0
RPF1	1.3989e-05	2.5898e-07	4e-06	268	4	-1.5422	921	0.99999	1	1	18872	0
AAMP	8.136e-05	2.5898e-07	4e-06	529	4	-1.5397	922	0.99992	1	1	18650	0
NOTCH2NL	0.0058928	1.1136e-05	0.000127	1666	3	-1.539	923	0.9299	0.99804	1	16369	0
PELP1	2.6747e-05	2.5898e-07	4e-06	353	4	-1.5383	924	0.99997	1	1	18801	0
USP17L28	0.00047946	2.5898e-07	4e-06	875	4	-1.537	925	0.99952	1	1	18414	0
NOP10	0.00015094	2.5898e-07	4e-06	637	4	-1.5356	926	0.99541	1	1	18004	0
DDB1	0.0016539	7.7695e-07	1.2e-05	1205	3	-1.535	927	0.13523	0.34002	1	2599	1
KCTD10	4.0498e-05	2.5898e-07	4e-06	411	4	-1.5347	928	0.99996	1	1	18750	0
ADAR	0.0005489	2.5898e-07	4e-06	917	3	-1.5344	929	0.8502	0.99049	1	14911	0
SF3A1	0.00069282	2.5898e-07	4e-06	978	4	-1.5329	930	0.99931	1	1	18350	0
NAA15	0.0011593	2.5898e-07	4e-06	1101	4	-1.5316	931	0.99504	1	1	17981	0
RRM2	0.0041876	4.4027e-06	5.5e-05	1529	4	-1.531	932	0.99581	1	1	18029	0
BOP1	0.001058	2.5898e-07	4e-06	1075	3	-1.5256	933	0.88308	0.99438	1	15505	0
COPG1	0.00032535	2.5898e-07	4e-06	788	4	-1.5254	934	0.99941	1	1	18373	0
CDK6	0.0091343	3.4963e-05	0.00036	1858	4	-1.524	935	0.98996	0.99995	1	17777	0
MCMBP	0.00050794	2.5898e-07	4e-06	893	4	-1.5207	936	0.99949	1	1	18400	0
EXOSC6	1.5403e-05	2.5898e-07	4e-06	278	3	-1.5201	937	0.34157	0.67385	1	6054	0
PSMA1	0.0040274	4.4027e-06	5.5e-05	1514	3	-1.52	938	0.070604	0.27077	1	1657	1
PTPN11	0.0010764	2.5898e-07	4e-06	1080	4	-1.5186	939	0.99892	1	1	18284	0
CYB5B	0.0021646	1.2949e-06	1.9e-05	1285	4	-1.5178	940	0.9879	0.99992	1	17719	0
PPP1R35	0.0076268	2.4604e-05	0.000261	1785	3	-1.5176	941	0.83801	0.98776	1	14683	0
CWC15	0.00035915	2.5898e-07	4e-06	808	3	-1.5158	942	0.35799	0.69091	1	6345	0
ARIH1	0.00056746	2.5898e-07	4e-06	928	4	-1.5136	943	0.99943	1	1	18380	0
MTPAP	0.026993	0.00049388	0.003618	2607	3	-1.5119	944	0.21526	0.46762	1	3890	1
RBM19	3.1339e-05	2.5898e-07	4e-06	376	4	-1.5092	945	0.99997	1	1	18783	0
GPR89B	7.4528e-05	2.5898e-07	4e-06	504	4	-1.5052	946	0.99993	1	1	18671	0
ARGLU1	0.0013357	2.5898e-07	4e-06	1147	4	-1.5027	947	0.99866	1	1	18252	0
WDR75	0.002957	2.3309e-06	3.2e-05	1397	4	-1.5026	948	0.99704	1	1	18115	0
METTL3	0.00018451	2.5898e-07	4e-06	675	4	-1.5005	949	0.99982	1	1	18530	0
EIF2S1	0.00038082	2.5898e-07	4e-06	825	4	-1.5001	950	0.99245	0.99998	1	17865	0
E4F1	0.00036056	2.5898e-07	4e-06	811	4	-1.4999	951	0.99964	1	1	18444	0
FTH1	0.0032456	2.8488e-06	3.8e-05	1427	4	-1.4992	952	0.98179	0.99981	1	17534	0
CDC6	0.003549	3.8848e-06	4.9e-05	1469	3	-1.4986	953	0.67302	0.93538	1	11835	0
GOLGA6L1	0.00058698	2.5898e-07	4e-06	939	4	-1.4976	954	0.99941	1	1	18375	0
BRF1	8.7512e-06	2.5898e-07	4e-06	213	4	-1.4959	955	0.99999	1	1	18923	0
DNAJC8	0.00021603	2.5898e-07	4e-06	707	4	-1.4932	956	0.99978	1	1	18512	0
HUS1	3.3083e-05	2.5898e-07	4e-06	386	4	-1.4909	957	0.99997	1	1	18776	0
COPS8	0.00044603	2.5898e-07	4e-06	858	3	-1.4889	958	0.91151	0.9968	1	16026	0
SHOC2	0.0025175	1.8129e-06	2.5e-05	1341	4	-1.4877	959	0.99748	1	1	18149	0
TBC1D3L	0.0023409	1.2949e-06	1.9e-05	1311	4	-1.4842	960	0.99201	0.99998	1	17841	0
POLR1E	0.0021142	1.2949e-06	1.9e-05	1278	3	-1.4836	961	0.80268	0.97972	1	14021	0
SACS	0.00203	1.2949e-06	1.9e-05	1264	4	-1.4833	962	0.99458	0.99999	1	17957	0
PCYT1A	0.0025784	1.8129e-06	2.5e-05	1351	3	-1.4825	963	0.90935	0.99647	1	15985	0
PPP1R10	6.0895e-06	2.5898e-07	4e-06	188	4	-1.4824	964	0.99999	1	1	18946	0
NUP85	0.0026795	1.8129e-06	2.5e-05	1360	4	-1.4787	965	0.96516	0.99947	1	17100	0
CHAF1A	0.0036615	3.8848e-06	4.9e-05	1482	4	-1.4765	966	0.9943	0.99999	1	17940	0
WDR12	0.0027647	2.3309e-06	3.2e-05	1378	4	-1.4713	967	0.98932	0.99994	1	17758	0
VWA9	5.7696e-05	2.5898e-07	4e-06	470	4	-1.4709	968	0.99994	1	1	18706	0
MBTPS2	0.001824	7.7695e-07	1.2e-05	1231	4	-1.4703	969	0.99818	1	1	18203	0
MAD2L2	0.00327	2.8488e-06	3.8e-05	1435	3	-1.4697	970	0.85456	0.99098	1	14996	0
LIN9	0.0011844	2.5898e-07	4e-06	1106	4	-1.4696	971	0.99882	1	1	18270	0
SLC35B2	0.00019803	2.5898e-07	4e-06	690	4	-1.4688	972	0.9998	1	1	18521	0
CHMP6	0.0032353	2.8488e-06	3.8e-05	1426	3	-1.4675	973	0.93724	0.99837	1	16505	0
GEMIN4	0.0037888	3.8848e-06	4.9e-05	1495	4	-1.4658	974	0.99212	0.99998	1	17847	0
POP4	0.0097117	4.8948e-05	0.000497	1881	4	-1.4658	975	0.97857	0.99975	1	17436	0
CBWD1	0.01384	0.00011007	0.001012	2077	3	-1.4657	976	0.25158	0.52608	1	4498	1
ELP4	0.0094418	4.843e-05	0.000494	1867	3	-1.4645	977	0.28197	0.58069	1	5010	0
NUP133	0.0032554	2.8488e-06	3.8e-05	1429	4	-1.4633	978	0.96496	0.99947	1	17094	0
INTS2	0.021778	0.00031104	0.002465	2402	3	-1.4632	979	0.38447	0.72288	1	6818	0
CGB1	0.00099245	2.5898e-07	4e-06	1056	4	-1.4608	980	0.99901	1	1	18297	0
TUBD1	0.0054769	9.0645e-06	0.000105	1626	3	-1.4607	981	0.52518	0.84886	1	9250	0
CDC27	0.00062703	2.5898e-07	4e-06	959	4	-1.4597	982	0.99937	1	1	18364	0
RPS21	0.00013833	2.5898e-07	4e-06	619	4	-1.458	983	0.99986	1	1	18579	0
MFN2	7.5821e-05	2.5898e-07	4e-06	510	4	-1.4566	984	0.99992	1	1	18665	0
STRAP	5.1436e-05	2.5898e-07	4e-06	450	4	-1.4549	985	0.99995	1	1	18720	0
PTPN23	6.22e-05	2.5898e-07	4e-06	480	4	-1.4545	986	0.99994	1	1	18698	0
CRNKL1	0.0088698	3.1855e-05	0.000329	1847	3	-1.4537	987	0.9511	0.99894	1	16792	0
PDCD7	0.00095052	2.5898e-07	4e-06	1049	4	-1.4525	988	0.99905	1	1	18300	0
CD3EAP	0.00088159	2.5898e-07	4e-06	1027	4	-1.4518	989	0.99912	1	1	18310	0
PRIM2	0.00041421	2.5898e-07	4e-06	840	4	-1.4506	990	0.99959	1	1	18430	0
SMG1	0.00094982	2.5898e-07	4e-06	1048	4	-1.4497	991	0.99905	1	1	18301	0
GOLGA6A	0.0050398	8.5465e-06	0.000101	1597	3	-1.4497	992	0.9361	0.99837	1	16480	0
GEMIN8	1.7782e-05	2.5898e-07	4e-06	296	4	-1.4484	993	0.99997	1	1	18806	0
ZFP36L1	0.00042864	2.5898e-07	4e-06	846	4	-1.448	994	0.99957	1	1	18424	0
YBX1	0.0058598	1.0618e-05	0.000122	1662	4	-1.4473	995	0.99414	0.99999	1	17929	0
NUP107	0.01691	0.00018207	0.001584	2197	3	-1.4471	996	0.93922	0.9985	1	16546	0
RIOK1	0.00026219	2.5898e-07	4e-06	740	3	-1.4454	997	0.070017	0.26858	1	1648	1
POLR2A	0.0045798	5.9567e-06	7.3e-05	1566	3	-1.4448	998	0.79582	0.97815	1	13894	0
UBR4	0.0004332	2.5898e-07	4e-06	850	4	-1.4447	999	0.99897	1	1	18293	0
USP17L18	0.00055718	2.5898e-07	4e-06	920	4	-1.4438	1000	0.99944	1	1	18387	0
MRPS25	0.00029798	2.5898e-07	4e-06	763	4	-1.4436	1001	0.99863	1	1	18247	0
ISY1-RAB43	0.0032609	2.8488e-06	3.8e-05	1432	4	-1.442	1002	0.99674	1	1	18092	0
KIAA1429	4.2585e-06	2.5898e-07	4e-06	164	4	-1.4402	1003	1	1	1	18969	0
ASH2L	0.00040251	2.5898e-07	4e-06	832	4	-1.4395	1004	0.99799	1	1	18188	0
SRSF11	0.00022672	2.5898e-07	4e-06	714	4	-1.4368	1005	0.99977	1	1	18505	0
RPL26	0.001451	7.7695e-07	1.2e-05	1168	4	-1.4365	1006	0.99855	1	1	18240	0
LYRM4	0.0018065	7.7695e-07	1.2e-05	1227	4	-1.4365	1007	0.9896	0.99994	1	17767	0
ANKRD52	0.011294	8.5206e-05	0.00083	1962	4	-1.434	1008	0.9605	0.99936	1	16999	0
NAA30	0.00014226	2.5898e-07	4e-06	626	4	-1.4339	1009	0.99986	1	1	18573	0
PRPF40A	0.0015874	7.7695e-07	1.2e-05	1195	4	-1.4338	1010	0.9868	0.99991	1	17682	0
HYOU1	0.0056671	9.5824e-06	0.000111	1646	3	-1.4331	1011	0.3558	0.68922	1	6310	0
TYMS	0.00065943	2.5898e-07	4e-06	972	4	-1.4326	1012	0.99552	1	1	18011	0
NMD3	0.00021511	2.5898e-07	4e-06	705	4	-1.4324	1013	0.99978	1	1	18514	0
USP17L29	0.010526	7.0185e-05	0.000698	1918	3	-1.4324	1014	0.94812	0.99887	1	16725	0
THAP11	2.7211e-05	2.5898e-07	4e-06	356	4	-1.4318	1015	0.99997	1	1	18798	0
ALYREF	0.00016501	2.5898e-07	4e-06	659	3	-1.431	1016	0.84675	0.98967	1	14855	0
SURF6	0.0014336	7.7695e-07	1.2e-05	1163	4	-1.43	1017	0.9944	0.99999	1	17945	0
RRP15	0.00060357	2.5898e-07	4e-06	948	4	-1.4272	1018	0.9977	1	1	18171	0
BARD1	0.00090802	2.5898e-07	4e-06	1036	4	-1.4271	1019	0.99542	1	1	18005	0
CDC5L	0.00025968	2.5898e-07	4e-06	739	4	-1.4265	1020	0.99974	1	1	18490	0
NUP43	0.0013122	2.5898e-07	4e-06	1142	4	-1.4265	1021	0.99869	1	1	18254	0
NUBP2	0.00033065	2.5898e-07	4e-06	791	4	-1.4261	1022	0.99967	1	1	18459	0
YAE1D1	0.0027467	2.3309e-06	3.2e-05	1375	4	-1.424	1023	0.99725	1	1	18128	0
LIN52	0.0075429	2.4604e-05	0.000261	1773	4	-1.4238	1024	0.96856	0.99954	1	17185	0
GTF3C3	0.00077204	2.5898e-07	4e-06	1001	4	-1.4231	1025	0.99324	0.99999	1	17893	0
WDR25	0.00012318	2.5898e-07	4e-06	601	4	-1.4222	1026	0.99988	1	1	18594	0
UBA3	6.9764e-06	2.5898e-07	4e-06	199	4	-1.4198	1027	0.99999	1	1	18937	0
DCTN4	0.0018516	1.2949e-06	1.9e-05	1234	3	-1.4198	1028	0.42592	0.77389	1	7552	0
MPHOSPH10	8.1826e-05	2.5898e-07	4e-06	530	4	-1.4191	1029	0.99992	1	1	18649	0
ATR	0.00063309	2.5898e-07	4e-06	963	4	-1.4187	1030	0.99937	1	1	18361	0
VARS2	0.0030588	2.3309e-06	3.2e-05	1406	4	-1.4184	1031	0.99694	1	1	18108	0
SKP1	0.0036511	3.8848e-06	4.9e-05	1479	4	-1.4171	1032	0.97408	0.99967	1	17313	0
AK6	0.0074199	2.2014e-05	0.000238	1770	4	-1.4166	1033	0.96507	0.99947	1	17097	0
NCAPH2	0.0041923	4.4027e-06	5.5e-05	1530	3	-1.4165	1034	0.88378	0.99454	1	15519	0
GLRX3	0.0024519	1.8129e-06	2.5e-05	1331	4	-1.4162	1035	0.99755	1	1	18156	0
SF3A2	0.019629	0.00026494	0.002157	2325	2	-1.415	1036	0.90165	0.99605	1	15836	0
POC1A	0.011873	8.7796e-05	0.000839	1983	4	-1.4129	1037	0.98813	0.99992	1	17726	0
GTF2H3	0.0019901	1.2949e-06	1.9e-05	1259	4	-1.4122	1038	0.96911	0.99954	1	17196	0
TSEN34	0.003314	3.3668e-06	4.4e-05	1441	3	-1.4121	1039	0.1219	0.33107	1	2403	1
GBF1	1.6533e-05	2.5898e-07	4e-06	289	4	-1.4105	1040	0.99998	1	1	18856	0
ZNHIT6	0.00043607	2.5898e-07	4e-06	853	4	-1.4086	1041	0.99956	1	1	18423	0
MRPS18A	5.5938e-05	2.5898e-07	4e-06	462	4	-1.4084	1042	0.99994	1	1	18711	0
FARSA	0.00099578	2.5898e-07	4e-06	1058	3	-1.4075	1043	0.86818	0.99263	1	15246	0
TOMM70A	0.0027331	2.3309e-06	3.2e-05	1371	4	-1.4051	1044	0.99727	1	1	18129	0
GTF2H4	0.0017019	7.7695e-07	1.2e-05	1208	3	-1.405	1045	0.93435	0.99831	1	16447	0
TUFM	0.0010197	2.5898e-07	4e-06	1064	3	-1.4036	1046	0.94493	0.99877	1	16661	0
RTF1	1.6506e-05	2.5898e-07	4e-06	288	4	-1.4027	1047	0.99998	1	1	18857	0
NSMCE1	0.001436	7.7695e-07	1.2e-05	1165	3	-1.4016	1048	0.76066	0.96931	1	13301	0
EXOSC5	0.0015048	7.7695e-07	1.2e-05	1183	3	-1.4016	1049	0.85095	0.99075	1	14924	0
ATP5H	0.0068526	1.528e-05	0.000169	1726	4	-1.4009	1050	0.9638	0.99944	1	17073	0
GTF3C5	1.6043e-05	2.5898e-07	4e-06	285	4	-1.4008	1051	0.99998	1	1	18859	0
TFRC	7.4611e-05	2.5898e-07	4e-06	505	4	-1.3995	1052	0.99993	1	1	18670	0
NPLOC4	0.0073016	2.1496e-05	0.000233	1759	3	-1.3992	1053	0.94839	0.99887	1	16729	0
TAF1D	0.0012472	2.5898e-07	4e-06	1123	3	-1.3982	1054	0.57597	0.88869	1	10133	0
UBTF	0.0094749	4.843e-05	0.000494	1870	3	-1.3953	1055	0.71822	0.95592	1	12600	0
EIF3E	2.6384e-05	2.5898e-07	4e-06	350	4	-1.3932	1056	0.99997	1	1	18804	0
USP17L15	0.0079513	2.4604e-05	0.000261	1803	3	-1.3932	1057	0.024744	0.17312	1	950	1
SMC5	7.1911e-05	2.5898e-07	4e-06	501	4	-1.392	1058	0.99993	1	1	18674	0
MYBBP1A	0.00018235	2.5898e-07	4e-06	671	4	-1.39	1059	0.99908	1	1	18304	0
UBE2H	0.00013725	2.5898e-07	4e-06	615	4	-1.3896	1060	0.99986	1	1	18583	0
ELP5	0.00030367	2.5898e-07	4e-06	771	4	-1.3894	1061	0.95933	0.99928	1	16974	0
TRAPPC1	0.011721	8.7796e-05	0.000839	1977	3	-1.3888	1062	0.9433	0.99864	1	16632	0
POLR1B	0.00031133	2.5898e-07	4e-06	778	3	-1.3879	1063	0.37952	0.71518	1	6736	0
ZNF626	7.8673e-05	2.5898e-07	4e-06	517	4	-1.3877	1064	0.99992	1	1	18661	0
GOLGA6C	9.8629e-05	2.5898e-07	4e-06	561	3	-1.3856	1065	0.93039	0.9981	1	16381	0
POLR2J3	0.00102	2.5898e-07	4e-06	1065	3	-1.3855	1066	0.60838	0.90868	1	10701	0
ISG20L2	0.0016268	7.7695e-07	1.2e-05	1202	4	-1.3855	1067	0.99584	1	1	18032	0
POLR1D	0.007064	1.787e-05	0.000196	1742	3	-1.3847	1068	0.85959	0.99177	1	15082	0
TTC4	0.001269	2.5898e-07	4e-06	1134	4	-1.3839	1069	0.99873	1	1	18260	0
KRI1	0.0020371	1.2949e-06	1.9e-05	1267	3	-1.3836	1070	0.91978	0.99738	1	16189	0
GNL2	6.4473e-05	2.5898e-07	4e-06	488	4	-1.3811	1071	0.99994	1	1	18690	0
DCTN2	1.1022e-05	2.5898e-07	4e-06	237	4	-1.381	1072	0.99999	1	1	18904	0
GTF2A2	0.00010569	2.5898e-07	4e-06	574	4	-1.3797	1073	0.99989	1	1	18615	0
PMPCB	0.00036036	2.5898e-07	4e-06	810	4	-1.3788	1074	0.99964	1	1	18445	0
FAM231A	0.00023643	2.5898e-07	4e-06	722	4	-1.3767	1075	0.99745	1	1	18146	0
USP17L27	0.0037289	3.8848e-06	4.9e-05	1488	3	-1.3763	1076	0.46539	0.80635	1	8235	0
TSPY4	6.0264e-06	2.5898e-07	4e-06	186	4	-1.3725	1077	0.99999	1	1	18947	0
PRR20C	0.0051755	8.5465e-06	0.000101	1607	3	-1.3717	1078	0.70779	0.95192	1	12427	0
KANSL3	4.3474e-05	2.5898e-07	4e-06	420	4	-1.3715	1079	0.99996	1	1	18741	0
ACLY	0.00081386	2.5898e-07	4e-06	1008	4	-1.3697	1080	0.99919	1	1	18324	0
FPGS	0.0076816	2.4604e-05	0.000261	1789	4	-1.3696	1081	0.96091	0.99936	1	17013	0
GOLGA8K	1.7007e-05	2.5898e-07	4e-06	294	4	-1.3687	1082	0.99998	1	1	18852	0
PSMD11	0.0075436	2.4604e-05	0.000261	1774	4	-1.3681	1083	0.99246	0.99998	1	17866	0
CPSF4	0.0023794	1.2949e-06	1.9e-05	1316	3	-1.3677	1084	0.27496	0.57654	1	4890	0
NUP93	0.0088773	3.1855e-05	0.000329	1849	3	-1.3663	1085	0.49249	0.83071	1	8678	0
TRAPPC11	3.942e-05	2.5898e-07	4e-06	406	4	-1.3656	1086	0.99996	1	1	18754	0
CCT8	0.00018371	2.5898e-07	4e-06	673	4	-1.3625	1087	0.99342	0.99999	1	17905	0
CWC22	0.0020466	1.2949e-06	1.9e-05	1268	4	-1.3596	1088	0.9901	0.99995	1	17780	0
SRCAP	0.0019613	1.2949e-06	1.9e-05	1254	4	-1.3582	1089	0.99804	1	1	18193	0
RPAP3	0.0016129	7.7695e-07	1.2e-05	1199	4	-1.3561	1090	0.99839	1	1	18221	0
CGB5	0.0090104	3.3409e-05	0.000345	1852	4	-1.3537	1091	0.99099	0.99997	1	17804	0
ATP6V1C1	0.00019627	2.5898e-07	4e-06	688	4	-1.3536	1092	0.9998	1	1	18523	0
ANKLE2	0.0067073	1.528e-05	0.000169	1717	4	-1.3497	1093	0.99243	0.99998	1	17863	0
ATP5A1	2.3244e-05	2.5898e-07	4e-06	331	4	-1.3473	1094	0.99998	1	1	18818	0
MRPS12	5.8937e-05	2.5898e-07	4e-06	471	4	-1.3467	1095	0.99994	1	1	18705	0
EARS2	0.00012868	2.5898e-07	4e-06	609	4	-1.3461	1096	0.99987	1	1	18588	0
SNRNP27	9.418e-05	2.5898e-07	4e-06	550	4	-1.3456	1097	0.99991	1	1	18633	0
NUFIP1	0.00090436	2.5898e-07	4e-06	1035	3	-1.3452	1098	0.20897	0.46096	1	3780	1
EXOSC10	0.003357	3.3668e-06	4.4e-05	1450	4	-1.3439	1099	0.96499	0.99947	1	17095	0
PYROXD1	0.00031803	2.5898e-07	4e-06	783	3	-1.3437	1100	0.94624	0.99882	1	16680	0
NUP160	0.00059042	2.5898e-07	4e-06	944	4	-1.3429	1101	0.99891	1	1	18282	0
OR4F16	0.0022367	1.2949e-06	1.9e-05	1297	3	-1.3409	1102	0.93579	0.99837	1	16472	0
SFSWAP	0.00051732	2.5898e-07	4e-06	898	4	-1.34	1103	0.99904	1	1	18299	0
NPIPB9	0.0057657	1.0618e-05	0.000122	1655	4	-1.34	1104	0.99423	0.99999	1	17934	0
COASY	1.7356e-06	2.5898e-07	4e-06	100	4	-1.339	1105	1	1	1	19027	0
ATRIP	6.8914e-05	2.5898e-07	4e-06	495	4	-1.3389	1106	0.99993	1	1	18683	0
PABPN1	0.0065702	1.4762e-05	0.000165	1702	3	-1.3386	1107	0.66673	0.93333	1	11721	0
CNOT1	0.0013917	7.7695e-07	1.2e-05	1157	4	-1.3371	1108	0.99776	1	1	18177	0
PGP	6.4453e-06	2.5898e-07	4e-06	191	4	-1.3366	1109	0.99999	1	1	18943	0
HIST1H2BJ	0.001915	1.2949e-06	1.9e-05	1247	3	-1.3365	1110	0.66378	0.93177	1	11674	0
GOLGA6L10	0.00040631	2.5898e-07	4e-06	836	4	-1.3349	1111	0.99959	1	1	18433	0
SMN1	9.8526e-05	2.5898e-07	4e-06	560	4	-1.3312	1112	0.9999	1	1	18624	0
C1orf27	0.015883	0.00016497	0.001459	2156	4	-1.3312	1113	0.97656	0.99971	1	17380	0
TMEM30A	0.0033439	3.3668e-06	4.4e-05	1445	4	-1.3303	1114	0.99331	0.99999	1	17899	0
HJURP	0.0090597	3.3927e-05	0.000349	1854	3	-1.3303	1115	0.31802	0.636	1	5624	0
XRN2	0.0092592	3.9107e-05	0.000401	1862	4	-1.3296	1116	0.99074	0.99997	1	17795	0
SLU7	0.00036443	2.5898e-07	4e-06	814	4	-1.3291	1117	0.99964	1	1	18442	0
TBC1D3B	7.5732e-06	2.5898e-07	4e-06	207	4	-1.3285	1118	0.99999	1	1	18930	0
CNOT3	0.0071769	2.046e-05	0.000223	1752	3	-1.3268	1119	0.92907	0.99801	1	16349	0
TARS	0.017231	0.0001945	0.00167	2213	3	-1.3263	1120	0.37534	0.71047	1	6650	0
USP17L20	0.0058705	1.1136e-05	0.000127	1663	3	-1.3259	1121	0.59478	0.90401	1	10476	0
AATF	0.0013436	7.7695e-07	1.2e-05	1149	3	-1.3245	1122	0.94305	0.99864	1	16627	0
ZNF131	0.0038945	4.4027e-06	5.5e-05	1506	3	-1.3241	1123	0.047607	0.23495	1	1324	1
ZWINT	0.0056945	9.5824e-06	0.000111	1648	4	-1.3236	1124	0.99187	0.99998	1	17835	0
AASDHPPT	0.00055373	2.5898e-07	4e-06	918	4	-1.3221	1125	0.96996	0.99956	1	17219	0
MRPL52	0.0010553	2.5898e-07	4e-06	1073	4	-1.3199	1126	0.99894	1	1	18288	0
BCL2L1	0.012497	8.8314e-05	0.000839	2012	4	-1.317	1127	0.9875	0.99992	1	17708	0
OXSM	6.4652e-06	2.5898e-07	4e-06	192	4	-1.3168	1128	0.99999	1	1	18942	0
CENPI	0.025047	0.0003675	0.002775	2531	2	-1.3166	1129	0.75213	0.96632	1	13170	0
EXOSC4	0.00010912	2.5898e-07	4e-06	577	4	-1.3155	1130	0.99989	1	1	18613	0
MBD3L4	0.0018467	1.2949e-06	1.9e-05	1233	4	-1.3143	1131	0.97554	0.99971	1	17345	0
ZC3H8	6.3787e-05	2.5898e-07	4e-06	483	3	-1.3138	1132	0.90924	0.99647	1	15982	0
SLC25A3	0.0068796	1.528e-05	0.000169	1731	4	-1.313	1133	0.98642	0.99991	1	17669	0
TARDBP	0.0063376	1.4244e-05	0.000161	1687	3	-1.3129	1134	0.71676	0.95472	1	12578	0
SPDYE2	0.00022605	2.5898e-07	4e-06	711	4	-1.3124	1135	0.99977	1	1	18508	0
KIF23	0.0019553	1.2949e-06	1.9e-05	1252	3	-1.3118	1136	0.94657	0.99884	1	16686	0
ZNF574	5.7151e-05	2.5898e-07	4e-06	465	4	-1.3095	1137	0.99994	1	1	18709	0
PDCD5	0.00010555	2.5898e-07	4e-06	573	4	-1.3082	1138	0.99989	1	1	18616	0
GTF2B	0.00032977	2.5898e-07	4e-06	790	4	-1.3079	1139	0.99967	1	1	18460	0
NCAPG2	0.005805	1.0618e-05	0.000122	1659	4	-1.3073	1140	0.96916	0.99954	1	17198	0
RIC1	0.00023172	2.5898e-07	4e-06	719	4	-1.3071	1141	0.99977	1	1	18503	0
XYLT2	0.00058884	2.5898e-07	4e-06	942	4	-1.3062	1142	0.99941	1	1	18372	0
ACACA	7.8608e-05	2.5898e-07	4e-06	515	4	-1.3035	1143	0.99992	1	1	18663	0
NKAP	0.0051496	8.5465e-06	0.000101	1604	4	-1.3026	1144	0.96393	0.99944	1	17077	0
GRWD1	0.0077622	2.4604e-05	0.000261	1793	3	-1.3022	1145	0.21966	0.46996	1	3958	1
SLC16A3	0.00015051	2.5898e-07	4e-06	635	4	-1.3006	1146	0.99985	1	1	18565	0
RECQL4	9.6397e-05	2.5898e-07	4e-06	555	4	-1.3001	1147	0.9999	1	1	18629	0
TCEB1	0.0066308	1.4762e-05	0.000165	1708	4	-1.2995	1148	0.99234	0.99998	1	17856	0
MDN1	0.0048881	6.9926e-06	8.4e-05	1587	3	-1.2991	1149	0.95471	0.99905	1	16875	0
SPCS3	0.0076381	2.4604e-05	0.000261	1787	3	-1.2989	1150	0.84971	0.99002	1	14903	0
AKIRIN2	0.00078041	2.5898e-07	4e-06	1003	4	-1.2987	1151	0.99922	1	1	18328	0
RACGAP1	0.00038241	2.5898e-07	4e-06	826	3	-1.2983	1152	0.93523	0.99834	1	16461	0
ELP6	0.0027119	2.3309e-06	3.2e-05	1366	3	-1.2982	1153	0.2156	0.46762	1	3897	1
AARS2	0.0010411	2.5898e-07	4e-06	1069	4	-1.2981	1154	0.99896	1	1	18291	0
SCFD1	0.011093	8.4688e-05	0.000828	1949	3	-1.298	1155	0.51772	0.84302	1	9118	0
IPO11	0.010722	7.3811e-05	0.00073	1930	3	-1.2952	1156	0.79714	0.97859	1	13916	0
DDX27	0.0038345	3.8848e-06	4.9e-05	1500	4	-1.2923	1157	0.99445	0.99999	1	17947	0
PFDN1	0.0080582	2.5122e-05	0.000263	1809	3	-1.2919	1158	0.64058	0.92518	1	11263	0
EIF2B1	0.00040039	2.5898e-07	4e-06	830	4	-1.2912	1159	0.97589	0.99971	1	17358	0
ELP2	0.00038367	2.5898e-07	4e-06	827	4	-1.2911	1160	0.98361	0.99986	1	17590	0
TP53TG3C	0.014539	0.00013079	0.001181	2105	4	-1.2911	1161	0.97539	0.99971	1	17341	0
ABCB7	0.008676	2.9265e-05	0.000304	1836	3	-1.2899	1162	0.90415	0.99623	1	15883	0
HEXIM1	0.0024168	1.8129e-06	2.5e-05	1323	4	-1.2898	1163	0.99758	1	1	18159	0
PRAMEF15	0.0010988	2.5898e-07	4e-06	1087	4	-1.2897	1164	0.95778	0.9992	1	16937	0
PRPF3	7.0964e-06	2.5898e-07	4e-06	201	4	-1.2882	1165	0.99999	1	1	18935	0
HTATSF1	0.0040436	4.4027e-06	5.5e-05	1515	4	-1.2878	1166	0.99596	1	1	18039	0
CTNNBL1	0.011234	8.5206e-05	0.00083	1957	3	-1.2872	1167	0.58635	0.89759	1	10330	0
ELP3	0.0031482	2.8488e-06	3.8e-05	1418	4	-1.2871	1168	0.99685	1	1	18100	0
ELAC2	0.0017132	7.7695e-07	1.2e-05	1209	3	-1.2846	1169	0.93983	0.99852	1	16564	0
STIL	0.00019344	2.5898e-07	4e-06	687	3	-1.2838	1170	0.88988	0.99494	1	15626	0
FZR1	3.6457e-06	2.5898e-07	4e-06	155	4	-1.2803	1171	1	1	1	18977	0
INTS3	0.00012722	2.5898e-07	4e-06	606	4	-1.2802	1172	0.99987	1	1	18590	0
AFG3L2	0.0006626	2.5898e-07	4e-06	975	4	-1.2799	1173	0.99871	1	1	18258	0
ZEB1	0.00058718	2.5898e-07	4e-06	941	4	-1.2774	1174	0.99941	1	1	18374	0
YY1	0.026	0.00041463	0.00309	2565	3	-1.2769	1175	0.2363	0.49907	1	4232	1
UFSP2	0.0047692	6.9926e-06	8.4e-05	1578	4	-1.276	1176	0.99523	1	1	17994	0
DOHH	1.2033e-05	2.5898e-07	4e-06	252	4	-1.2754	1177	0.99999	1	1	18889	0
MOB4	0.0013464	7.7695e-07	1.2e-05	1151	4	-1.2747	1178	0.99865	1	1	18250	0
GAR1	2.7075e-05	2.5898e-07	4e-06	355	4	-1.2719	1179	0.99997	1	1	18799	0
CMPK1	0.012788	9.1422e-05	0.000862	2026	4	-1.2718	1180	0.98552	0.9999	1	17645	0
UHRF1	0.0007546	2.5898e-07	4e-06	994	4	-1.2717	1181	0.99888	1	1	18277	0
SAP30BP	0.0012113	2.5898e-07	4e-06	1111	4	-1.271	1182	0.99879	1	1	18268	0
SPDL1	0.00085172	2.5898e-07	4e-06	1020	4	-1.2709	1183	0.99915	1	1	18315	0
MRPS30	0.00031354	2.5898e-07	4e-06	781	3	-1.2694	1184	0.66897	0.93333	1	11758	0
NAE1	0.00058706	2.5898e-07	4e-06	940	4	-1.2687	1185	0.96787	0.99953	1	17169	0
INTS9	0.0014777	7.7695e-07	1.2e-05	1174	3	-1.2686	1186	0.041767	0.2238	1	1245	1
DDX3X	0.0052137	8.5465e-06	0.000101	1612	3	-1.2681	1187	0.00018079	0.0046055	1	33	1
C10orf2	0.00046441	2.5898e-07	4e-06	866	4	-1.2677	1188	0.99954	1	1	18418	0
BRCA1	0.0004709	2.5898e-07	4e-06	873	4	-1.2673	1189	0.99953	1	1	18415	0
THOC2	2.7701e-05	2.5898e-07	4e-06	359	4	-1.2671	1190	0.99997	1	1	18795	0
GSPT1	0.042247	0.0010611	0.006473	3101	3	-1.2671	1191	0.93365	0.99825	1	16438	0
WDR46	0.036145	0.00075701	0.004947	2913	4	-1.266	1192	0.96117	0.99937	1	17020	0
GATC	0.012645	9.0386e-05	0.000855	2020	3	-1.2659	1193	0.30041	0.60518	1	5320	0
KIAA0391	0.01822	0.00022506	0.001885	2269	3	-1.2657	1194	0.82536	0.9839	1	14453	0
SAFB	8.0063e-05	2.5898e-07	4e-06	523	4	-1.2634	1195	0.99992	1	1	18657	0
TXNL4B	0.023555	0.00035507	0.002699	2465	3	-1.2617	1196	0.61629	0.91455	1	10844	0
RNF40	0.00029391	2.5898e-07	4e-06	760	4	-1.2611	1197	0.99971	1	1	18479	0
GOLGA6D	0.0004798	2.5898e-07	4e-06	876	4	-1.2602	1198	0.99952	1	1	18413	0
C2orf44	0.00048861	2.5898e-07	4e-06	881	4	-1.2597	1199	0.99619	1	1	18053	0
FTSJ3	0.00032014	2.5898e-07	4e-06	786	4	-1.2585	1200	0.99968	1	1	18464	0
RPA2	0.0041946	4.4027e-06	5.5e-05	1532	4	-1.2583	1201	0.99404	0.99999	1	17925	0
RMI1	0.003224	2.8488e-06	3.8e-05	1425	3	-1.2576	1202	0.93635	0.99837	1	16486	0
SCYL1	0.012483	8.8314e-05	0.000839	2011	4	-1.2576	1203	0.96447	0.99944	1	17081	0
USP17L22	0.048652	0.0011952	0.007038	3216	3	-1.2576	1204	0.56367	0.87837	1	9920	0
PPP2R4	9.4502e-05	2.5898e-07	4e-06	551	4	-1.2575	1205	0.99991	1	1	18632	0
TSPY3	0.00036957	2.5898e-07	4e-06	817	4	-1.255	1206	0.98452	0.99987	1	17617	0
NXF1	0.00046877	2.5898e-07	4e-06	870	3	-1.2527	1207	0.88084	0.99386	1	15474	0
TBP	0.0028492	2.3309e-06	3.2e-05	1389	4	-1.2521	1208	0.98553	0.9999	1	17646	0
RPLP1	0.023336	0.00035507	0.002699	2456	3	-1.2513	1209	0.094333	0.30193	1	1990	1
ZCCHC9	3.3753e-05	2.5898e-07	4e-06	389	4	-1.2505	1210	0.99997	1	1	18773	0
SYMPK	0.0021408	1.2949e-06	1.9e-05	1279	4	-1.2493	1211	0.97876	0.99977	1	17444	0
RBM42	0.00012049	2.5898e-07	4e-06	591	4	-1.2486	1212	0.99988	1	1	18603	0
PPP6R3	0.0031205	2.8488e-06	3.8e-05	1417	4	-1.2482	1213	0.99688	1	1	18101	0
PES1	2.3926e-05	2.5898e-07	4e-06	336	4	-1.2469	1214	0.99998	1	1	18814	0
TUBA1C	0.00097675	2.5898e-07	4e-06	1053	3	-1.2462	1215	0.95685	0.99916	1	16917	0
BRD4	0.0031141	2.8488e-06	3.8e-05	1416	3	-1.2459	1216	0.63668	0.92349	1	11199	0
TARS2	2.4515e-05	2.5898e-07	4e-06	338	4	-1.2452	1217	0.99998	1	1	18812	0
CCNB1	0.0023378	1.2949e-06	1.9e-05	1310	4	-1.2452	1218	0.99614	1	1	18048	0
WDR92	0.0059604	1.1136e-05	0.000127	1670	3	-1.2444	1219	0.87076	0.99293	1	15292	0
MRPL20	0.040558	0.0009585	0.005991	3052	3	-1.2435	1220	0.61434	0.91324	1	10806	0
GADD45GIP1	0.0016183	7.7695e-07	1.2e-05	1200	4	-1.2431	1221	0.99838	1	1	18220	0
EIF3H	0.00043354	2.5898e-07	4e-06	851	3	-1.2427	1222	0.92544	0.99786	1	16280	0
SEC13	0.0012219	2.5898e-07	4e-06	1117	4	-1.2424	1223	0.98999	0.99995	1	17778	0
SLC3A2	0.0098314	5.102e-05	0.000516	1889	3	-1.242	1224	0.94992	0.99894	1	16762	0
DCP2	0.010652	7.0703e-05	0.000701	1926	4	-1.2419	1225	0.98265	0.99984	1	17562	0
DNTTIP2	0.00010342	2.5898e-07	4e-06	567	4	-1.2411	1226	0.9999	1	1	18620	0
CGB2	0.0023182	1.2949e-06	1.9e-05	1309	4	-1.24	1227	0.99768	1	1	18170	0
NOC2L	0.0039369	4.4027e-06	5.5e-05	1508	4	-1.2397	1228	0.99387	0.99999	1	17917	0
CMTR1	0.0091968	3.5999e-05	0.00037	1860	3	-1.2396	1229	0.74812	0.96539	1	13094	0
TUBB8	0.025449	0.00039806	0.002984	2549	4	-1.2372	1230	0.97455	0.99969	1	17322	0
MED4	0.0014145	7.7695e-07	1.2e-05	1161	4	-1.237	1231	0.99859	1	1	18242	0
MRPL12	0.0015902	7.7695e-07	1.2e-05	1197	3	-1.2367	1232	0.81985	0.98277	1	14343	0
MED31	0.0073972	2.2014e-05	0.000238	1769	3	-1.2363	1233	0.88644	0.9947	1	15565	0
METTL1	0.00019183	2.5898e-07	4e-06	683	4	-1.2351	1234	0.99748	1	1	18148	0
ARFRP1	0.00056889	2.5898e-07	4e-06	929	4	-1.2329	1235	0.99943	1	1	18379	0
EIF1AD	0.018382	0.00022558	0.001885	2279	3	-1.2301	1236	0.51369	0.83999	1	9057	0
TBL3	0.028501	0.00055034	0.003916	2660	3	-1.2301	1237	0.36783	0.69932	1	6524	0
RPL36A-HNRNPH2	0.014455	0.00011473	0.001045	2099	2	-1.2296	1238	0.78256	0.97477	1	13674	0
USP37	0.00031934	2.5898e-07	4e-06	785	4	-1.2287	1239	0.99968	1	1	18465	0
TMA16	0.01413	0.00011421	0.001043	2089	3	-1.2283	1240	0.61044	0.90935	1	10740	0
CENPL	0.00032026	2.5898e-07	4e-06	787	4	-1.2271	1241	0.99968	1	1	18463	0
CKS1B	0.00040728	2.5898e-07	4e-06	837	4	-1.2259	1242	0.99959	1	1	18432	0
BYSL	0.0118	8.7796e-05	0.000839	1980	4	-1.2256	1243	0.97273	0.99959	1	17278	0
NCL	0.0025476	1.8129e-06	2.5e-05	1344	4	-1.2251	1244	0.98008	0.99977	1	17491	0
NGDN	0.026702	0.00047058	0.00346	2594	3	-1.2246	1245	0.71404	0.95394	1	12535	0
NOL8	0.0014408	7.7695e-07	1.2e-05	1167	4	-1.2245	1246	0.98157	0.99981	1	17526	0
GPR89A	0.00085622	2.5898e-07	4e-06	1022	4	-1.2244	1247	0.9877	0.99992	1	17713	0
HNRNPU	0.020457	0.00027064	0.002185	2361	4	-1.2242	1248	0.97954	0.99977	1	17468	0
HIST2H3D	0.039117	0.00088392	0.00557	3009	4	-1.224	1249	0.96088	0.99936	1	17011	0
MRPL41	0.00082185	2.5898e-07	4e-06	1010	4	-1.2227	1250	0.99918	1	1	18323	0
PRPF31	6.7077e-05	2.5898e-07	4e-06	492	4	-1.2225	1251	0.99993	1	1	18686	0
DDX31	0.00021347	2.5898e-07	4e-06	704	4	-1.2224	1252	0.99891	1	1	18281	0
PRR20B	0.0035913	3.8848e-06	4.9e-05	1473	3	-1.2224	1253	0.92802	0.99797	1	16331	0
NAA25	0.0058789	1.1136e-05	0.000127	1664	3	-1.2218	1254	0.95539	0.99907	1	16888	0
NMT1	0.0013322	2.5898e-07	4e-06	1145	3	-1.221	1255	0.93661	0.99837	1	16491	0
MRPL4	0.00026727	2.5898e-07	4e-06	744	4	-1.2202	1256	0.99973	1	1	18488	0
RNPC3	0.0020862	1.2949e-06	1.9e-05	1276	4	-1.2198	1257	0.99705	1	1	18116	0
LSM6	0.0066507	1.4762e-05	0.000165	1711	4	-1.219	1258	0.99335	0.99999	1	17901	0
MATR3	0.015717	0.00016446	0.001459	2149	4	-1.2189	1259	0.98428	0.99986	1	17608	0
DPY30	0.0094864	4.843e-05	0.000494	1872	4	-1.2185	1260	0.98736	0.99992	1	17701	0
TBC1D3K	0.0038159	3.8848e-06	4.9e-05	1498	3	-1.2184	1261	0.53785	0.85916	1	9479	0
VPS29	0.00097575	2.5898e-07	4e-06	1052	4	-1.2165	1262	0.9946	0.99999	1	17958	0
MAD2L1BP	0.0013388	2.5898e-07	4e-06	1148	4	-1.2165	1263	0.99866	1	1	18251	0
ATP6V1F	0.0054388	9.0645e-06	0.000105	1623	3	-1.2163	1264	0.38127	0.71677	1	6765	0
GNL3L	0.0011469	2.5898e-07	4e-06	1098	4	-1.2162	1265	0.99875	1	1	18264	0
NARS2	0.0044537	4.9207e-06	6e-05	1555	4	-1.2158	1266	0.99062	0.99996	1	17794	0
RNF8	0.00032649	2.5898e-07	4e-06	789	4	-1.2152	1267	0.99967	1	1	18461	0
SMG5	0.01639	0.00016808	0.001468	2176	3	-1.2141	1268	0.94943	0.99892	1	16749	0
DCAF13	0.0011657	2.5898e-07	4e-06	1103	4	-1.2131	1269	0.99883	1	1	18271	0
TOPBP1	0.0055636	9.0645e-06	0.000105	1638	4	-1.2102	1270	0.99444	0.99999	1	17946	0
DYNLL1	0.0082925	2.5122e-05	0.000263	1819	4	-1.2091	1271	0.97137	0.99957	1	17247	0
VRK1	0.00015678	2.5898e-07	4e-06	647	4	-1.2089	1272	0.99984	1	1	18553	0
INO80	0.027833	0.00054982	0.003916	2641	3	-1.2077	1273	0.4651	0.80635	1	8229	0
NUMA1	0.0004216	2.5898e-07	4e-06	845	4	-1.2064	1274	0.99958	1	1	18426	0
RCE1	1.2086e-05	2.5898e-07	4e-06	254	4	-1.2063	1275	0.99999	1	1	18887	0
ARHGAP29	0.019659	0.00026494	0.002157	2327	3	-1.2063	1276	0.93923	0.9985	1	16548	0
N6AMT1	0.00051984	2.5898e-07	4e-06	901	4	-1.2049	1277	0.99948	1	1	18396	0
HIST2H2AA4	0.0022767	1.2949e-06	1.9e-05	1305	4	-1.2032	1278	0.99772	1	1	18173	0
CPSF3	0.0010685	2.5898e-07	4e-06	1078	4	-1.2005	1279	0.99893	1	1	18286	0
THAP1	0.0025751	1.8129e-06	2.5e-05	1350	3	-1.1995	1280	0.93864	0.99847	1	16536	0
GPS1	0.0032984	3.3668e-06	4.4e-05	1438	4	-1.199	1281	0.9967	1	1	18088	0
SSB	1.8548e-05	2.5898e-07	4e-06	303	4	-1.1987	1282	0.99998	1	1	18844	0
LARS2	2.0098e-05	2.5898e-07	4e-06	316	4	-1.1987	1283	0.99998	1	1	18832	0
NRDE2	0.02001	0.00026546	0.002157	2344	3	-1.1987	1284	0.88329	0.99438	1	15506	0
ACTR5	0.0067967	1.528e-05	0.000169	1723	3	-1.1981	1285	0.91764	0.9972	1	16157	0
CHERP	0.00014751	2.5898e-07	4e-06	632	4	-1.1973	1286	0.99985	1	1	18568	0
FDPS	0.022872	0.00034989	0.002699	2435	4	-1.1971	1287	0.97081	0.99957	1	17235	0
COPZ1	0.0044067	4.9207e-06	6e-05	1548	4	-1.1967	1288	0.98363	0.99986	1	17591	0
FAM72C	0.014243	0.00011421	0.001043	2092	3	-1.1962	1289	0.90489	0.99623	1	15898	0
RGP1	0.0021474	1.2949e-06	1.9e-05	1282	4	-1.1941	1290	0.97305	0.9996	1	17285	0
TSEN2	0.0011127	2.5898e-07	4e-06	1092	3	-1.1935	1291	0.18646	0.43617	1	3410	1
IER3IP1	6.4436e-05	2.5898e-07	4e-06	487	4	-1.1934	1292	0.99994	1	1	18691	0
ERI1	0.0020747	1.2949e-06	1.9e-05	1274	3	-1.1934	1293	0.90227	0.99605	1	15848	0
DHX38	0.0035058	3.8848e-06	4.9e-05	1467	4	-1.1922	1294	0.96332	0.99942	1	17061	0
MED7	0.0071555	2.046e-05	0.000223	1750	3	-1.1901	1295	0.80073	0.97972	1	13977	0
RAB7A	0.0037769	3.8848e-06	4.9e-05	1494	4	-1.1888	1296	0.96935	0.99955	1	17202	0
ZCCHC8	3.9067e-06	2.5898e-07	4e-06	159	4	-1.1887	1297	1	1	1	18973	0
PSMG1	0.0024702	1.8129e-06	2.5e-05	1333	4	-1.1879	1298	0.99753	1	1	18155	0
HIF1AN	0.00024208	2.5898e-07	4e-06	725	4	-1.1878	1299	0.99976	1	1	18498	0
SETD2	0.00092625	2.5898e-07	4e-06	1040	4	-1.1878	1300	0.98106	0.99979	1	17511	0
OGT	0.00045525	2.5898e-07	4e-06	862	4	-1.1865	1301	0.99954	1	1	18421	0
LSM11	0.00011332	2.5898e-07	4e-06	582	4	-1.186	1302	0.99989	1	1	18611	0
EIF5B	0.00093875	2.5898e-07	4e-06	1045	4	-1.1846	1303	0.99009	0.99995	1	17779	0
H3F3B	0.00084863	2.5898e-07	4e-06	1019	4	-1.1845	1304	0.99915	1	1	18317	0
GEMIN2	0.012943	9.6601e-05	0.000906	2034	4	-1.1828	1305	0.98564	0.99991	1	17650	0
TTF1	0.0036036	3.8848e-06	4.9e-05	1475	3	-1.1827	1306	0.86453	0.99232	1	15180	0
NIFK	0.0014862	7.7695e-07	1.2e-05	1177	3	-1.1825	1307	0.27828	0.58069	1	4940	0
TMEM41A	0.00011357	2.5898e-07	4e-06	583	4	-1.1809	1308	0.99989	1	1	18610	0
BCAS2	0.00018648	2.5898e-07	4e-06	677	4	-1.1806	1309	0.99981	1	1	18529	0
MRPS2	0.0014974	7.7695e-07	1.2e-05	1179	4	-1.1789	1310	0.9985	1	1	18233	0
PTCD3	1.586e-05	2.5898e-07	4e-06	282	4	-1.1788	1311	0.99998	1	1	18861	0
NPIPB3	5.9916e-05	2.5898e-07	4e-06	478	4	-1.1786	1312	0.99994	1	1	18699	0
RGPD8	0.037256	0.00078757	0.005091	2949	3	-1.1757	1313	0.85584	0.99143	1	15018	0
CHCHD4	0.0010279	2.5898e-07	4e-06	1067	4	-1.1753	1314	0.99569	1	1	18019	0
VPS36	0.018724	0.00023283	0.001934	2301	3	-1.1748	1315	0.78302	0.97477	1	13679	0
RNF103-CHMP3	0.0017723	7.7695e-07	1.2e-05	1219	3	-1.1743	1316	0.42405	0.77259	1	7517	0
UBE4B	0.0037996	3.8848e-06	4.9e-05	1496	4	-1.1738	1317	0.9962	1	1	18056	0
DPH5	0.014925	0.00013131	0.001181	2120	3	-1.1723	1318	0.95518	0.99907	1	16884	0
FOSL1	0.0021448	1.2949e-06	1.9e-05	1281	4	-1.1721	1319	0.99786	1	1	18182	0
RRP1	0.019436	0.00025769	0.002123	2319	4	-1.1715	1320	0.98056	0.99978	1	17500	0
MRPS22	0.00059	2.5898e-07	4e-06	943	4	-1.1714	1321	0.99666	1	1	18086	0
VPS72	0.021596	0.00029706	0.002366	2399	4	-1.1704	1322	0.9784	0.99975	1	17431	0
HIST1H2BL	0.057184	0.0013408	0.007521	3364	3	-1.1699	1323	0.90488	0.99623	1	15897	0
EWSR1	0.00010384	2.5898e-07	4e-06	568	4	-1.1694	1324	0.9999	1	1	18619	0
HMGCR	0.00019021	2.5898e-07	4e-06	681	4	-1.1691	1325	0.99981	1	1	18525	0
LCMT1	0.00034103	2.5898e-07	4e-06	794	4	-1.1689	1326	0.99966	1	1	18455	0
H3F3A	0.025193	0.00039133	0.002952	2534	3	-1.1689	1327	0.81528	0.98182	1	14252	0
TSEN15	0.0022388	1.2949e-06	1.9e-05	1298	3	-1.1687	1328	0.57344	0.88711	1	10093	0
SLC39A1	0.0056131	9.0645e-06	0.000105	1642	4	-1.1678	1329	0.98519	0.99989	1	17636	0
RNF20	0.0011784	2.5898e-07	4e-06	1105	3	-1.1677	1330	0.94729	0.99887	1	16704	0
MRPL28	0.012826	9.194e-05	0.000865	2029	3	-1.1671	1331	0.49416	0.83277	1	8707	0
SMNDC1	0.0001047	2.5898e-07	4e-06	572	4	-1.1669	1332	0.98499	0.99989	1	17630	0
MED28	0.0060258	1.1136e-05	0.000127	1674	4	-1.1669	1333	0.99198	0.99998	1	17839	0
TCERG1	0.0073156	2.1496e-05	0.000233	1761	3	-1.1662	1334	0.60057	0.9067	1	10570	0
UBE2D3	0.0047197	6.4746e-06	7.9e-05	1575	4	-1.1652	1335	0.99528	1	1	17996	0
METTL16	0.03095	0.0005923	0.004092	2743	3	-1.1629	1336	0.91447	0.99701	1	16084	0
SLC25A26	0.00059138	2.5898e-07	4e-06	946	4	-1.1627	1337	0.99941	1	1	18371	0
RBMX	0.00057962	2.5898e-07	4e-06	937	4	-1.1608	1338	0.99942	1	1	18377	0
NOP9	0.0022397	1.2949e-06	1.9e-05	1299	3	-1.1596	1339	0.11596	0.32653	1	2312	1
MRPL53	5.7321e-05	2.5898e-07	4e-06	466	4	-1.1587	1340	0.99994	1	1	18708	0
KRT18	0.015178	0.00014322	0.001285	2131	3	-1.1571	1341	0.46269	0.80516	1	8190	0
MCM2	0.0001562	2.5898e-07	4e-06	645	4	-1.156	1342	0.99984	1	1	18555	0
TSFM	0.00048577	2.5898e-07	4e-06	880	4	-1.156	1343	0.99951	1	1	18409	0
UBE2G2	8.9552e-05	2.5898e-07	4e-06	543	4	-1.1557	1344	0.99991	1	1	18640	0
CHD8	0.010723	7.3811e-05	0.00073	1931	4	-1.1545	1345	0.98928	0.99994	1	17757	0
UBE2C	0.057184	0.0013408	0.007521	3363	3	-1.154	1346	0.82928	0.98528	1	14532	0
OPA1	0.0073816	2.2014e-05	0.000238	1766	3	-1.153	1347	0.90374	0.99623	1	15877	0
ELAVL1	0.0010185	2.5898e-07	4e-06	1063	4	-1.1529	1348	0.9904	0.99996	1	17787	0
PPWD1	1.9591e-05	2.5898e-07	4e-06	312	4	-1.1528	1349	0.99998	1	1	18834	0
DRAP1	0.0029861	2.3309e-06	3.2e-05	1401	4	-1.1488	1350	0.96561	0.99948	1	17113	0
PDRG1	0.002478	1.8129e-06	2.5e-05	1334	4	-1.1477	1351	0.99729	1	1	18130	0
COPS2	0.0094684	4.843e-05	0.000494	1869	4	-1.1468	1352	0.99053	0.99996	1	17792	0
TSG101	0.00024754	2.5898e-07	4e-06	732	4	-1.1445	1353	0.99975	1	1	18493	0
TP53	0.039253	0.00088392	0.00557	3016	3	-1.1432	1354	0.67919	0.93689	1	11938	0
CFLAR	0.0057657	1.0618e-05	0.000122	1654	4	-1.1417	1355	0.99423	0.99999	1	17935	0
TMED2	0.00048121	2.5898e-07	4e-06	877	4	-1.141	1356	0.99808	1	1	18195	0
PARN	0.0036901	3.8848e-06	4.9e-05	1484	4	-1.1409	1357	0.99631	1	1	18064	0
MCM4	0.01983	0.00026494	0.002157	2331	3	-1.1401	1358	0.91188	0.99686	1	16035	0
TRAPPC2	0.0018114	7.7695e-07	1.2e-05	1228	4	-1.1394	1359	0.95935	0.99928	1	16977	0
MBD3L3	0.0006182	2.5898e-07	4e-06	954	4	-1.1381	1360	0.99908	1	1	18305	0
RCC1	0.00062795	2.5898e-07	4e-06	960	4	-1.138	1361	0.99937	1	1	18363	0
SENP6	0.00050533	2.5898e-07	4e-06	891	4	-1.1379	1362	0.99949	1	1	18402	0
FERMT2	2.9416e-05	2.5898e-07	4e-06	367	4	-1.1371	1363	0.99997	1	1	18792	0
BNIP1	0.020498	0.00027064	0.002185	2364	4	-1.1367	1364	0.96593	0.99948	1	17122	0
RAD50	0.014523	0.00013079	0.001181	2102	4	-1.1344	1365	0.96267	0.99942	1	17050	0
POLD1	0.0089059	3.2891e-05	0.00034	1851	4	-1.1334	1366	0.99109	0.99997	1	17805	0
SPDYE6	9.0172e-05	2.5898e-07	4e-06	544	4	-1.1333	1367	0.99991	1	1	18639	0
HIST2H4B	0.00029426	2.5898e-07	4e-06	761	4	-1.1312	1368	0.99971	1	1	18478	0
PRKRIR	0.0019999	1.2949e-06	1.9e-05	1261	4	-1.1305	1369	0.97098	0.99957	1	17238	0
RPEL1	0.0064197	1.4244e-05	0.000161	1693	3	-1.1303	1370	0.47065	0.81096	1	8317	0
SLC7A5	0.0012158	2.5898e-07	4e-06	1114	4	-1.1301	1371	0.99847	1	1	18226	0
DAXX	0.0068699	1.528e-05	0.000169	1729	4	-1.1298	1372	0.99313	0.99999	1	17890	0
LAMTOR4	0.00023382	2.5898e-07	4e-06	720	4	-1.1292	1373	0.99977	1	1	18502	0
FCHO2	0.0024981	1.8129e-06	2.5e-05	1336	4	-1.1266	1374	0.99249	0.99998	1	17867	0
BRF2	0.036743	0.00077152	0.005009	2935	3	-1.1258	1375	0.9061	0.99629	1	15922	0
DICER1	0.0023693	1.2949e-06	1.9e-05	1313	4	-1.1245	1376	0.99763	1	1	18167	0
PABPC1	0.0012777	2.5898e-07	4e-06	1135	3	-1.1242	1377	0.88478	0.99454	1	15536	0
CLSPN	0.0022033	1.2949e-06	1.9e-05	1292	4	-1.1241	1378	0.9978	1	1	18179	0
CDK11B	0.079396	0.0022793	0.011532	3736	3	-1.124	1379	0.09601	0.30193	1	2016	1
MIPEP	0.031512	0.00059282	0.004092	2764	3	-1.1233	1380	0.85349	0.99098	1	14971	0
CDS2	0.009678	4.8948e-05	0.000497	1879	4	-1.1228	1381	0.97377	0.99964	1	17304	0
SLBP	0.021147	0.00027841	0.002228	2384	3	-1.1227	1382	0.56037	0.8775	1	9866	0
KIAA0100	0.0024226	1.8129e-06	2.5e-05	1325	3	-1.1218	1383	0.90266	0.99611	1	15855	0
PDAP1	0.056787	0.0012905	0.007351	3356	3	-1.1215	1384	0.74723	0.9644	1	13081	0
PTK2	5.1909e-05	2.5898e-07	4e-06	452	4	-1.1201	1385	0.99995	1	1	18718	0
FAM25C	0.0071338	1.8906e-05	0.000207	1749	4	-1.1201	1386	0.99287	0.99999	1	17880	0
TOE1	0.013173	0.00010075	0.00094	2044	3	-1.1198	1387	0.75959	0.96902	1	13282	0
CDT1	7.511e-05	2.5898e-07	4e-06	507	4	-1.1175	1388	0.99992	1	1	18668	0
GTF3C6	0.0057219	9.5824e-06	0.000111	1650	3	-1.1173	1389	0.9099	0.99663	1	15995	0
TMEM258	0.0018858	1.2949e-06	1.9e-05	1240	4	-1.1163	1390	0.99811	1	1	18198	0
GFM1	0.00090047	2.5898e-07	4e-06	1032	4	-1.1153	1391	0.96482	0.99947	1	17091	0
POLR2B	0.029842	0.00055915	0.003916	2703	4	-1.1149	1392	0.97016	0.99956	1	17223	0
PRPF4B	0.022113	0.00031156	0.002465	2414	3	-1.1143	1393	0.79363	0.97742	1	13852	0
NOL9	0.00016381	2.5898e-07	4e-06	657	4	-1.114	1394	0.99984	1	1	18544	0
F8A1	7.9583e-05	2.5898e-07	4e-06	521	4	-1.1116	1395	0.99992	1	1	18659	0
RPP14	0.00040432	2.5898e-07	4e-06	833	4	-1.1113	1396	0.98978	0.99995	1	17773	0
LTV1	0.0044798	5.4387e-06	6.7e-05	1558	4	-1.1113	1397	0.99552	1	1	18010	0
PRPF18	0.02733	0.00053532	0.003884	2623	3	-1.1101	1398	0.52366	0.84794	1	9222	0
CDC73	3.2368e-05	2.5898e-07	4e-06	382	4	-1.1097	1399	0.99997	1	1	18778	0
SUN2	0.0080234	2.5122e-05	0.000263	1806	3	-1.1062	1400	0.66585	0.93232	1	11711	0
ACTG1	0.00088662	2.5898e-07	4e-06	1031	4	-1.106	1401	0.99911	1	1	18309	0
USO1	0.023966	0.00035559	0.002699	2487	3	-1.1058	1402	0.75169	0.96601	1	13163	0
CENPC	0.0062159	1.1654e-05	0.000132	1682	4	-1.1057	1403	0.97707	0.99971	1	17403	0
PC	0.019824	0.00026494	0.002157	2330	4	-1.105	1404	0.98018	0.99977	1	17495	0
USP36	0.00068044	2.5898e-07	4e-06	977	4	-1.1034	1405	0.99932	1	1	18352	0
USP17L25	0.042707	0.0010611	0.006473	3119	3	-1.1029	1406	0.55568	0.8741	1	9788	0
NCAPH	0.013809	0.00010851	0.000999	2074	3	-1.1019	1407	0.78826	0.97602	1	13767	0
TPRKB	0.0048706	6.9926e-06	8.4e-05	1583	4	-1.1	1408	0.98684	0.99991	1	17686	0
CEP192	0.00060911	2.5898e-07	4e-06	951	4	-1.0998	1409	0.99939	1	1	18369	0
C16orf59	0.00072514	2.5898e-07	4e-06	990	4	-1.0991	1410	0.99927	1	1	18338	0
LRRC37A	0.0031129	2.8488e-06	3.8e-05	1415	3	-1.0991	1411	0.74151	0.96275	1	12994	0
THOC7	0.053445	0.0012413	0.007136	3298	2	-1.0986	1412	0.19985	0.45417	1	3631	1
SMC6	0.0023997	1.2949e-06	1.9e-05	1318	4	-1.0985	1413	0.9976	1	1	18162	0
PIK3C3	4.6133e-05	2.5898e-07	4e-06	432	4	-1.0983	1414	0.99995	1	1	18732	0
USE1	0.00033793	2.5898e-07	4e-06	792	4	-1.0973	1415	0.99966	1	1	18457	0
SLC31A1	0.0034282	3.8848e-06	4.9e-05	1458	3	-1.0973	1416	0.128	0.33545	1	2494	1
WDR26	0.0043585	4.9207e-06	6e-05	1546	4	-1.0967	1417	0.99382	0.99999	1	17916	0
ATP6V0D1	0.01315	0.00010075	0.00094	2043	3	-1.0956	1418	0.45927	0.80275	1	8123	0
PTTG1	0.0045042	5.4387e-06	6.7e-05	1560	4	-1.0955	1419	0.99484	0.99999	1	17970	0
RFC4	0.0017512	7.7695e-07	1.2e-05	1215	4	-1.0943	1420	0.99825	1	1	18211	0
CCND1	0.0038465	3.8848e-06	4.9e-05	1502	4	-1.0942	1421	0.99615	1	1	18050	0
PSMD13	0.0050911	8.5465e-06	0.000101	1598	4	-1.0933	1422	0.99491	0.99999	1	17974	0
CPSF1	0.011099	8.4688e-05	0.000828	1950	4	-1.0928	1423	0.95851	0.99924	1	16952	0
PRCC	0.0076159	2.4604e-05	0.000261	1781	4	-1.0923	1424	0.98108	0.99979	1	17513	0
DNM1L	0.00039044	2.5898e-07	4e-06	828	4	-1.0908	1425	0.99961	1	1	18438	0
MRPL18	0.0057882	1.0618e-05	0.000122	1658	3	-1.0907	1426	0.47694	0.81665	1	8423	0
TMED10	0.0066471	1.4762e-05	0.000165	1710	4	-1.0906	1427	0.99335	0.99999	1	17902	0
ELMO2	0.00069669	2.5898e-07	4e-06	982	4	-1.0899	1428	0.9993	1	1	18347	0
RPA1	0.0018565	1.2949e-06	1.9e-05	1235	4	-1.0892	1429	0.99266	0.99998	1	17872	0
MAU2	0.00035342	2.5898e-07	4e-06	801	3	-1.089	1430	0.9306	0.9981	1	16386	0
NAA20	0.017668	0.00020796	0.001773	2242	4	-1.0866	1431	0.97979	0.99977	1	17478	0
GPS2	0.024127	0.00035559	0.002699	2496	3	-1.0865	1432	0.89679	0.99572	1	15750	0
MED27	0.015787	0.00016446	0.001459	2151	3	-1.0859	1433	0.94793	0.99887	1	16722	0
DUSP12	0.0010474	2.5898e-07	4e-06	1071	4	-1.0852	1434	0.99895	1	1	18289	0
C16orf72	0.015352	0.0001572	0.001404	2138	3	-1.0848	1435	0.78778	0.97602	1	13758	0
CDC42	0.0013222	2.5898e-07	4e-06	1144	4	-1.0842	1436	0.99764	1	1	18168	0
MRPL44	0.0001752	2.5898e-07	4e-06	665	4	-1.0834	1437	0.99982	1	1	18538	0
SHQ1	0.0041923	4.4027e-06	5.5e-05	1531	3	-1.0833	1438	0.85112	0.99075	1	14926	0
KLF16	0.019381	0.00025717	0.002121	2318	4	-1.0822	1439	0.98062	0.99978	1	17502	0
AMY1A	0.0015032	7.7695e-07	1.2e-05	1182	3	-1.0809	1440	0.058813	0.2529	1	1490	1
PDCL	2.0749e-05	2.5898e-07	4e-06	318	4	-1.0802	1441	0.99998	1	1	18830	0
RCL1	0.0075953	2.4604e-05	0.000261	1778	2	-1.0788	1442	0.79133	0.97648	1	13810	0
TMEM208	0.0038721	4.4027e-06	5.5e-05	1505	4	-1.0781	1443	0.99613	1	1	18047	0
EDC4	0.00016459	2.5898e-07	4e-06	658	4	-1.0774	1444	0.99984	1	1	18543	0
SERBP1	0.016077	0.00016756	0.001468	2164	4	-1.0772	1445	0.98374	0.99986	1	17598	0
USPL1	0.0049345	8.0285e-06	9.6e-05	1590	4	-1.0761	1446	0.99507	1	1	17983	0
CBWD3	0.0037274	3.8848e-06	4.9e-05	1487	4	-1.076	1447	0.99627	1	1	18061	0
ARPC3	0.0056047	9.0645e-06	0.000105	1640	4	-1.076	1448	0.9944	0.99999	1	17944	0
RNF25	4.6386e-06	2.5898e-07	4e-06	169	4	-1.0758	1449	1	1	1	18964	0
EXOC4	0.0093846	4.7394e-05	0.000486	1865	3	-1.0757	1450	0.94256	0.99864	1	16620	0
PRC1	0.0006529	2.5898e-07	4e-06	968	4	-1.0752	1451	0.99935	1	1	18356	0
YTHDC1	0.0039848	4.4027e-06	5.5e-05	1510	3	-1.0745	1452	0.52397	0.84794	1	9231	0
UBOX5	2.0265e-06	2.5898e-07	4e-06	109	4	-1.0741	1453	1	1	1	19018	0
PAF1	0.0014306	7.7695e-07	1.2e-05	1162	4	-1.0732	1454	0.96088	0.99936	1	17010	0
GART	0.00052296	2.5898e-07	4e-06	905	4	-1.0727	1455	0.99948	1	1	18392	0
TRAPPC5	0.017748	0.00021055	0.001784	2245	3	-1.0715	1456	0.82889	0.98512	1	14527	0
WDR4	0.011084	8.4688e-05	0.000828	1947	3	-1.0712	1457	0.62559	0.91882	1	11000	0
CDK7	0.018272	0.00022506	0.001885	2272	4	-1.0706	1458	0.96026	0.99936	1	16993	0
LUC7L2	0.0010767	2.5898e-07	4e-06	1081	4	-1.068	1459	0.99652	1	1	18077	0
ATP6V1E1	0.015876	0.00016497	0.001459	2154	3	-1.0675	1460	0.45411	0.79674	1	8031	0
GOLGA6L6	0.012596	8.9868e-05	0.000851	2018	4	-1.0673	1461	0.9874	0.99992	1	17704	0
ALG8	0.035946	0.00075701	0.004947	2906	3	-1.0659	1462	0.90863	0.99641	1	15971	0
MED10	4.8821e-05	2.5898e-07	4e-06	442	4	-1.0658	1463	0.99995	1	1	18725	0
SMC1A	6.5182e-05	2.5898e-07	4e-06	489	4	-1.0656	1464	0.99993	1	1	18689	0
POLG2	0.0044091	4.9207e-06	6e-05	1549	4	-1.0647	1465	0.99559	1	1	18015	0
KATNB1	0.0066664	1.4762e-05	0.000165	1713	3	-1.0641	1466	0.92717	0.99793	1	16311	0
PTBP1	0.0012417	2.5898e-07	4e-06	1122	3	-1.0635	1467	0.25867	0.53958	1	4610	1
MRPS18C	0.0034679	3.8848e-06	4.9e-05	1461	4	-1.0629	1468	0.99653	1	1	18078	0
CFAP20	0.0014073	7.7695e-07	1.2e-05	1160	4	-1.0618	1469	0.99859	1	1	18243	0
PAK2	0.007209	2.0978e-05	0.000228	1754	3	-1.0617	1470	0.75122	0.96601	1	13156	0
NBPF14	0.0019334	1.2949e-06	1.9e-05	1250	2	-1.0612	1471	0.39457	0.73338	1	6983	0
LOC101060321	0.007079	1.787e-05	0.000196	1743	3	-1.0609	1472	0.10179	0.30872	1	2099	1
CDC40	0.027686	0.00053584	0.003884	2636	3	-1.0604	1473	0.50754	0.83898	1	8956	0
VPS53	0.014826	0.00013131	0.001181	2115	4	-1.0591	1474	0.98517	0.99989	1	17635	0
RBM14	0.012466	8.8314e-05	0.000839	2009	3	-1.0583	1475	0.95005	0.99894	1	16767	0
SNAPC4	0.010775	7.4329e-05	0.000733	1936	2	-1.0578	1476	0.28022	0.58069	1	4982	0
METAP1	0.00062898	2.5898e-07	4e-06	962	4	-1.0576	1477	0.99937	1	1	18362	0
CPSF6	0.020586	0.00027116	0.002185	2370	3	-1.0558	1478	0.69283	0.94362	1	12177	0
SNAPC3	0.033425	0.00063995	0.004329	2818	2	-1.0553	1479	0.29285	0.59306	1	5180	0
STARD7	0.0012493	2.5898e-07	4e-06	1124	4	-1.0532	1480	0.97243	0.99959	1	17267	0
TRAIP	0.00087737	2.5898e-07	4e-06	1026	4	-1.0525	1481	0.99912	1	1	18312	0
DYNC1I2	0.00062152	2.5898e-07	4e-06	957	3	-1.0512	1482	0.26344	0.53958	1	4702	0
CGB	9.283e-05	2.5898e-07	4e-06	548	4	-1.0507	1483	0.99991	1	1	18635	0
NR2C2AP	0.00030771	2.5898e-07	4e-06	776	4	-1.0499	1484	0.99969	1	1	18470	0
SNRNP35	0.00028294	2.5898e-07	4e-06	754	3	-1.0484	1485	0.63391	0.92119	1	11153	0
NFYC	0.00030529	2.5898e-07	4e-06	772	3	-1.048	1486	0.2667	0.54619	1	4759	0
FAM25G	7.5277e-05	2.5898e-07	4e-06	509	4	-1.0464	1487	0.99992	1	1	18666	0
MRPL16	0.0067022	1.528e-05	0.000169	1716	3	-1.0456	1488	0.91005	0.99663	1	16000	0
AGAP9	0.025248	0.00039754	0.002984	2537	3	-1.0453	1489	0.4476	0.79306	1	7927	0
DOLPP1	0.003183	2.8488e-06	3.8e-05	1423	4	-1.0444	1490	0.99682	1	1	18096	0
USP17L17	0.045332	0.0011154	0.006739	3162	2	-1.044	1491	0.25059	0.52377	1	4479	1
PSMC1	0.013553	0.00010489	0.00097	2062	3	-1.0439	1492	0.90808	0.99641	1	15961	0
POTEB2	0.0096599	4.8948e-05	0.000497	1878	3	-1.0433	1493	0.9105	0.99669	1	16009	0
MPLKIP	0.00056178	2.5898e-07	4e-06	925	4	-1.0424	1494	0.99944	1	1	18382	0
TSPY10	3.8655e-05	2.5898e-07	4e-06	405	4	-1.0421	1495	0.99996	1	1	18756	0
TAF8	0.0042871	4.4027e-06	5.5e-05	1542	4	-1.0417	1496	0.99571	1	1	18020	0
PSMB6	0.017769	0.00021055	0.001784	2246	4	-1.0398	1497	0.97419	0.99967	1	17316	0
UBA5	0.021878	0.00031104	0.002465	2406	3	-1.0367	1498	0.9266	0.99793	1	16301	0
NEK7	0.15456	0.0095552	0.035507	5110	2	-1.0366	1499	0.28336	0.58069	1	5035	0
NDUFAB1	0.0036088	3.8848e-06	4.9e-05	1476	4	-1.0353	1500	0.99639	1	1	18069	0
SERPINB6	0.006736	1.528e-05	0.000169	1720	3	-1.0352	1501	0.94162	0.99858	1	16602	0
HIST1H4J	0.0018439	7.7695e-07	1.2e-05	1232	4	-1.0349	1502	0.99816	1	1	18202	0
NOL7	0.027601	0.00053584	0.003884	2634	4	-1.0335	1503	0.9724	0.99959	1	17266	0
PUM1	0.00045702	2.5898e-07	4e-06	863	4	-1.0334	1504	0.99954	1	1	18420	0
RPL7L1	0.016353	0.00016756	0.001468	2175	3	-1.0316	1505	0.90661	0.99635	1	15932	0
ESF1	0.0021629	1.2949e-06	1.9e-05	1284	4	-1.0309	1506	0.99784	1	1	18180	0
CSHL1	0.012838	9.194e-05	0.000865	2030	3	-1.0302	1507	0.95209	0.99899	1	16813	0
RNF10	0.034636	0.0007104	0.004733	2868	3	-1.0302	1508	0.9211	0.99761	1	16209	0
CTU1	0.010225	6.2933e-05	0.00063	1906	4	-1.03	1509	0.98977	0.99995	1	17772	0
ZNHIT1	0.03171	0.00059282	0.004092	2769	3	-1.0298	1510	0.94703	0.99887	1	16698	0
CUL2	0.021839	0.00031104	0.002465	2405	4	-1.0297	1511	0.97816	0.99975	1	17425	0
FXN	0.0023007	1.2949e-06	1.9e-05	1307	3	-1.0292	1512	0.89133	0.99516	1	15653	0
CXorf49B	0.024083	0.00035559	0.002699	2493	3	-1.0291	1513	0.65902	0.92908	1	11593	0
MRPL10	0.00093814	2.5898e-07	4e-06	1044	4	-1.0289	1514	0.99906	1	1	18303	0
MBD3L5	0.0020646	1.2949e-06	1.9e-05	1271	4	-1.0256	1515	0.99794	1	1	18186	0
ZBTB17	0.023087	0.00035507	0.002699	2443	3	-1.0252	1516	0.93752	0.9984	1	16516	0
MRPL15	4.73e-05	2.5898e-07	4e-06	437	4	-1.0238	1517	0.99995	1	1	18730	0
RNGTT	0.0020565	1.2949e-06	1.9e-05	1270	4	-1.0237	1518	0.98642	0.99991	1	17668	0
AP2M1	2.6536e-05	2.5898e-07	4e-06	352	4	-1.0228	1519	0.99997	1	1	18802	0
TADA2A	0.0019091	1.2949e-06	1.9e-05	1244	4	-1.0221	1520	0.97921	0.99977	1	17455	0
ZNF143	0.016987	0.00018776	0.001628	2204	4	-1.0219	1521	0.98301	0.99984	1	17573	0
SMARCB1	0.0034402	3.8848e-06	4.9e-05	1459	4	-1.0217	1522	0.98811	0.99992	1	17725	0
PRR20E	0.00012222	2.5898e-07	4e-06	595	4	-1.0209	1523	0.99988	1	1	18598	0
TSPY2	0.085557	0.002487	0.012332	3839	2	-1.0203	1524	0.44816	0.79306	1	7933	0
AIFM1	0.019158	0.00024733	0.002044	2313	3	-1.0194	1525	0.92734	0.99793	1	16316	0
CHMP7	0.029162	0.00055863	0.003916	2679	3	-1.0179	1526	0.66131	0.93019	1	11634	0
GAK	0.0015365	7.7695e-07	1.2e-05	1186	4	-1.0168	1527	0.99846	1	1	18225	0
C2orf27B	0.0033256	3.3668e-06	4.4e-05	1442	3	-1.0164	1528	0.8113	0.98097	1	14186	0
TOP1MT	0.0030703	2.8488e-06	3.8e-05	1409	4	-1.0161	1529	0.99693	1	1	18107	0
RABIF	0.00017489	2.5898e-07	4e-06	664	4	-1.0157	1530	0.99983	1	1	18539	0
GIGYF2	0.0049366	8.0285e-06	9.6e-05	1591	4	-1.0157	1531	0.98202	0.99982	1	17541	0
CARTPT	0.002067	1.2949e-06	1.9e-05	1273	3	-1.0152	1532	0.78334	0.97477	1	13686	0
OR4F17	0.0011053	2.5898e-07	4e-06	1089	4	-1.0142	1533	0.99889	1	1	18280	0
TRMT6	0.0052521	8.5465e-06	0.000101	1616	4	-1.0139	1534	0.97937	0.99977	1	17460	0
NDOR1	0.020468	0.00027064	0.002185	2363	4	-1.0124	1535	0.97953	0.99977	1	17467	0
ADRM1	0.00049571	2.5898e-07	4e-06	885	4	-1.0118	1536	0.99481	0.99999	1	17966	0
MRPL46	0.013459	0.00010437	0.000968	2060	3	-1.0106	1537	0.46761	0.80867	1	8269	0
TSPY1	0.04857	0.0011952	0.007038	3214	3	-1.01	1538	0.91661	0.99711	1	16132	0
PPP1R15B	0.06825	0.0016754	0.008968	3548	2	-1.0089	1539	0.93064	0.9981	1	16388	0
UPF2	0.0038588	3.8848e-06	4.9e-05	1504	3	-1.0081	1540	0.42504	0.77389	1	7533	0
TTI2	0.01811	0.00021107	0.001784	2260	4	-1.0069	1541	0.98189	0.99982	1	17538	0
HIST1H2BI	0.0024515	1.8129e-06	2.5e-05	1330	3	-1.0064	1542	0.45815	0.80275	1	8107	0
PRKAR1A	0.013963	0.00011162	0.001023	2084	4	-1.004	1543	0.98604	0.99991	1	17657	0
RAD23B	0.033997	0.00068087	0.004571	2847	3	-1.004	1544	0.94773	0.99887	1	16716	0
CWC25	0.0013108	2.5898e-07	4e-06	1141	3	-1.0034	1545	0.75912	0.96872	1	13272	0
C16orf62	0.0040532	4.4027e-06	5.5e-05	1517	4	-1.0018	1546	0.98816	0.99992	1	17727	0
ATG101	4.3585e-05	2.5898e-07	4e-06	421	4	-1.0017	1547	0.99996	1	1	18740	0
CCNL1	0.013214	0.00010075	0.00094	2049	4	-1.0016	1548	0.98359	0.99986	1	17589	0
RAC1	0.0065986	1.4762e-05	0.000165	1705	4	-1.0008	1549	0.9934	0.99999	1	17904	0
RARS2	0.0078072	2.4604e-05	0.000261	1796	3	-0.99986	1550	0.86613	0.99253	1	15210	0
CCDC51	0.0272	0.00050942	0.003721	2617	3	-0.99926	1551	0.68967	0.94076	1	12127	0
BPTF	0.0010631	2.5898e-07	4e-06	1077	4	-0.99907	1552	0.96747	0.99953	1	17160	0
MRPL55	0.0025939	1.8129e-06	2.5e-05	1352	3	-0.9987	1553	0.31373	0.6246	1	5552	0
JTB	0.0013165	2.5898e-07	4e-06	1143	4	-0.99765	1554	0.99868	1	1	18253	0
EBNA1BP2	0.015588	0.00016135	0.001438	2144	4	-0.99611	1555	0.98441	0.99987	1	17613	0
LAGE3	0.018161	0.00022506	0.001885	2265	4	-0.99583	1556	0.96448	0.99944	1	17082	0
UTP14A	0.00084517	2.5898e-07	4e-06	1018	4	-0.99571	1557	0.99915	1	1	18318	0
KIF15	0.0032195	2.8488e-06	3.8e-05	1424	4	-0.99538	1558	0.99678	1	1	18095	0
TAF7	0.0021421	1.2949e-06	1.9e-05	1280	3	-0.9949	1559	0.7663	0.97132	1	13391	0
MRPS16	0.0063188	1.4244e-05	0.000161	1685	4	-0.99393	1560	0.95873	0.99924	1	16960	0
MED22	0.0017853	7.7695e-07	1.2e-05	1222	4	-0.99378	1561	0.9941	0.99999	1	17928	0
DNAJA3	0.0056112	9.0645e-06	0.000105	1641	4	-0.99339	1562	0.97648	0.99971	1	17377	0
HNRNPF	0.0061234	1.1654e-05	0.000132	1680	4	-0.99335	1563	0.99388	0.99999	1	17918	0
FCGR1B	0.017299	0.0001945	0.00167	2215	4	-0.9926	1564	0.96058	0.99936	1	17001	0
SLC25A28	0.024569	0.00035559	0.002699	2514	3	-0.99229	1565	0.87811	0.99378	1	15426	0
NFYA	0.0054142	9.0645e-06	0.000105	1622	3	-0.99178	1566	0.93587	0.99837	1	16473	0
TBC1D3	8.8605e-05	2.5898e-07	4e-06	542	4	-0.99076	1567	0.99991	1	1	18641	0
MAPK1	0.0016908	7.7695e-07	1.2e-05	1207	4	-0.99024	1568	0.99831	1	1	18216	0
GCN1L1	0.0027085	2.3309e-06	3.2e-05	1365	4	-0.98969	1569	0.99536	1	1	18000	0
SEC61G	0.028942	0.00055034	0.003916	2674	2	-0.98934	1570	0.64659	0.92798	1	11371	0
ABT1	0.0051963	8.5465e-06	0.000101	1610	4	-0.98784	1571	0.96228	0.99941	1	17042	0
CEPT1	5.0285e-05	2.5898e-07	4e-06	449	4	-0.98628	1572	0.99995	1	1	18721	0
RPL29	0.0017661	7.7695e-07	1.2e-05	1218	3	-0.98571	1573	0.685	0.9398	1	12041	0
GLMN	0.0010949	2.5898e-07	4e-06	1085	4	-0.98563	1574	0.99598	1	1	18041	0
SIN3A	0.00037845	2.5898e-07	4e-06	822	4	-0.98493	1575	0.99962	1	1	18441	0
DAP3	0.010138	6.0343e-05	0.000606	1902	3	-0.98419	1576	0.82582	0.98406	1	14467	0
EIF3M	0.0033478	3.3668e-06	4.4e-05	1446	3	-0.9841	1577	0.84186	0.98847	1	14767	0
MRPL49	0.02053	0.00027064	0.002185	2367	3	-0.98228	1578	0.60536	0.90737	1	10654	0
PSMG2	0.076814	0.0019297	0.009999	3688	3	-0.98098	1579	0.80339	0.97972	1	14037	0
OR4F21	0.01384	0.00011007	0.001012	2078	3	-0.98036	1580	0.93814	0.9984	1	16531	0
FAM20B	0.020449	0.00027064	0.002185	2360	4	-0.97854	1581	0.97955	0.99977	1	17469	0
DCPS	0.019148	0.00024733	0.002044	2312	4	-0.97806	1582	0.98085	0.99979	1	17506	0
FBXO42	0.0041059	4.4027e-06	5.5e-05	1523	4	-0.97784	1583	0.99473	0.99999	1	17961	0
SNF8	0.00052332	2.5898e-07	4e-06	907	4	-0.97674	1584	0.99948	1	1	18391	0
F8A3	0.0022432	1.2949e-06	1.9e-05	1300	4	-0.97656	1585	0.99776	1	1	18176	0
HSPA14	0.0012506	2.5898e-07	4e-06	1125	4	-0.9763	1586	0.96168	0.99939	1	17035	0
SMN2	0.019081	0.00024733	0.002044	2311	4	-0.97598	1587	0.98092	0.99979	1	17507	0
SNIP1	0.0012057	2.5898e-07	4e-06	1110	4	-0.97512	1588	0.99832	1	1	18217	0
CDC123	0.0058835	1.1136e-05	0.000127	1665	2	-0.97462	1589	0.43602	0.78301	1	7734	0
KNTC1	0.0047104	6.4746e-06	7.9e-05	1574	4	-0.97454	1590	0.99529	1	1	17997	0
CHTF18	0.016956	0.00018776	0.001628	2202	4	-0.97416	1591	0.98304	0.99984	1	17575	0
MRPL54	0.00040602	2.5898e-07	4e-06	835	4	-0.97405	1592	0.99959	1	1	18434	0
C9orf114	0.012037	8.7796e-05	0.000839	1988	3	-0.97377	1593	0.57178	0.88401	1	10064	0
WDR36	0.001563	7.7695e-07	1.2e-05	1193	3	-0.97226	1594	0.48955	0.82757	1	8634	0
C1QTNF4	0.0031557	2.8488e-06	3.8e-05	1420	4	-0.97155	1595	0.99684	1	1	18099	0
IER5	0.030966	0.0005923	0.004092	2744	3	-0.97145	1596	0.62706	0.91943	1	11028	0
SLMAP	0.0094533	4.843e-05	0.000494	1868	3	-0.96966	1597	0.93323	0.99825	1	16434	0
VPS37A	0.0015384	7.7695e-07	1.2e-05	1187	3	-0.96952	1598	0.63257	0.92119	1	11133	0
SPCS2	0.0057258	1.01e-05	0.000117	1651	4	-0.96923	1599	0.99427	0.99999	1	17939	0
SMPD4	0.00084073	2.5898e-07	4e-06	1016	4	-0.96738	1600	0.99829	1	1	18215	0
RSRC2	0.010425	6.5523e-05	0.000654	1914	4	-0.96704	1601	0.98957	0.99994	1	17764	0
NELFB	0.0076058	2.4604e-05	0.000261	1779	3	-0.96687	1602	0.95252	0.99899	1	16824	0
LENG8	0.0064292	1.4244e-05	0.000161	1694	4	-0.96647	1603	0.99357	0.99999	1	17912	0
RNASEK	8.2879e-05	2.5898e-07	4e-06	532	2	-0.96501	1604	0.7538	0.96753	1	13192	0
TAF1	0.079727	0.0022793	0.011532	3742	2	-0.96488	1605	0.7251	0.95745	1	12719	0
ACTL6A	0.00048425	2.5898e-07	4e-06	878	4	-0.96478	1606	0.99952	1	1	18411	0
KIAA1524	1.8475e-05	2.5898e-07	4e-06	302	4	-0.96444	1607	0.99998	1	1	18845	0
POLE4	0.00011586	2.5898e-07	4e-06	585	4	-0.9638	1608	0.99988	1	1	18609	0
SNRPC	0.017145	0.00018828	0.001629	2210	3	-0.96302	1609	0.87542	0.99322	1	15374	0
AMY1B	0.00024338	2.5898e-07	4e-06	727	4	-0.96241	1610	0.99976	1	1	18496	0
MRPL27	0.0033088	3.3668e-06	4.4e-05	1440	3	-0.9608	1611	0.93105	0.9981	1	16397	0
PPIL4	0.017108	0.00018828	0.001629	2207	3	-0.96063	1612	0.90315	0.99611	1	15864	0
HIST2H2BF	0.0087113	2.9265e-05	0.000304	1839	4	-0.95848	1613	0.99129	0.99998	1	17813	0
TECR	0.0063316	1.4244e-05	0.000161	1686	3	-0.95718	1614	0.95018	0.99894	1	16773	0
THOC5	0.00086989	2.5898e-07	4e-06	1024	4	-0.95659	1615	0.99913	1	1	18313	0
KRTAP2-2	0.0061276	1.1654e-05	0.000132	1681	4	-0.95648	1616	0.98739	0.99992	1	17702	0
PRAMEF5	0.014758	0.00013079	0.001181	2113	3	-0.95641	1617	0.31986	0.636	1	5656	0
NOLC1	0.014892	0.00013131	0.001181	2118	4	-0.95542	1618	0.98511	0.99989	1	17632	0
UBE2L3	0.02492	0.0003675	0.002775	2525	3	-0.95527	1619	0.62158	0.91762	1	10930	0
NDST1	0.00064952	2.5898e-07	4e-06	967	4	-0.95483	1620	0.99744	1	1	18142	0
PA2G4	0.0015212	7.7695e-07	1.2e-05	1184	4	-0.95479	1621	0.99848	1	1	18228	0
GOLGA8J	0.039011	0.00086838	0.00552	3006	3	-0.9547	1622	0.60352	0.9067	1	10618	0
HNRNPM	0.0051427	8.5465e-06	0.000101	1601	3	-0.9532	1623	0.89829	0.99585	1	15781	0
TUBGCP5	0.033456	0.00063995	0.004329	2820	4	-0.95315	1624	0.95819	0.99924	1	16945	0
CEP85	0.0048059	6.9926e-06	8.4e-05	1581	4	-0.95181	1625	0.99519	1	1	17990	0
NUP214	0.06777	0.0016458	0.00889	3537	3	-0.94996	1626	0.42793	0.77523	1	7584	0
RPL37A	0.014283	0.00011421	0.001043	2093	4	-0.9493	1627	0.98572	0.99991	1	17652	0
RAD51	0.0042035	4.4027e-06	5.5e-05	1534	3	-0.94905	1628	0.88663	0.99478	1	15571	0
ZMAT5	0.0022902	1.2949e-06	1.9e-05	1306	4	-0.94813	1629	0.99771	1	1	18172	0
TUBB4B	0.036371	0.00075701	0.004947	2922	3	-0.94796	1630	0.55991	0.8775	1	9859	0
HSD17B10	0.035104	0.00072438	0.004803	2882	3	-0.94788	1631	0.86192	0.9921	1	15118	0
C19orf40	0.001291	2.5898e-07	4e-06	1137	4	-0.9478	1632	0.99596	1	1	18040	0
WBSCR16	0.044778	0.0010756	0.006527	3151	3	-0.9474	1633	0.86501	0.99232	1	15190	0
TTI1	0.005237	8.5465e-06	0.000101	1614	3	-0.94723	1634	0.41124	0.75629	1	7289	0
SLC7A6OS	1.7828e-05	2.5898e-07	4e-06	297	4	-0.94689	1635	0.99998	1	1	18850	0
RANBP9	0.055058	0.0012646	0.007245	3329	3	-0.94613	1636	0.28856	0.59103	1	5113	0
UFD1L	0.0065818	1.4762e-05	0.000165	1704	4	-0.94559	1637	0.99342	0.99999	1	17906	0
TCEB3CL2	0.0016298	7.7695e-07	1.2e-05	1204	2	-0.94431	1638	0.49574	0.83483	1	8739	0
MRPL23	0.025299	0.00039754	0.002984	2540	3	-0.94268	1639	0.44631	0.79306	1	7903	0
AGAP6	0.0090684	3.3927e-05	0.000349	1855	3	-0.94258	1640	0.83148	0.98595	1	14568	0
UBE2M	0.037867	0.00083315	0.00534	2968	3	-0.94202	1641	0.95015	0.99894	1	16772	0
ERAL1	0.0040147	4.4027e-06	5.5e-05	1513	4	-0.94113	1642	0.99599	1	1	18042	0
ZMAT2	0.0011891	2.5898e-07	4e-06	1107	2	-0.94085	1643	0.84747	0.98967	1	14868	0
BSG	0.018925	0.00024681	0.002042	2306	3	-0.94034	1644	0.76819	0.9727	1	13424	0
RAD51D	0.042429	0.0010611	0.006473	3107	3	-0.9403	1645	0.50307	0.83586	1	8873	0
MMGT1	0.0071301	1.8906e-05	0.000207	1748	4	-0.93985	1646	0.99093	0.99997	1	17802	0
VDAC1	0.0011577	2.5898e-07	4e-06	1100	4	-0.93901	1647	0.99884	1	1	18272	0
NSMCE2	0.0077217	2.4604e-05	0.000261	1792	4	-0.9383	1648	0.99228	0.99998	1	17852	0
XRCC3	0.018958	0.00024681	0.002042	2307	4	-0.9382	1649	0.98104	0.99979	1	17510	0
NAA40	0.0043122	4.4027e-06	5.5e-05	1543	4	-0.93781	1650	0.99569	1	1	18018	0
SRP72	0.0064674	1.4762e-05	0.000165	1697	3	-0.9378	1651	0.71614	0.95433	1	12566	0
LEMD3	0.0028492	2.3309e-06	3.2e-05	1390	3	-0.9375	1652	0.75025	0.966	1	13136	0
EIF1	0.0046137	6.4746e-06	7.9e-05	1570	4	-0.93498	1653	0.99539	1	1	18003	0
COG2	0.0040469	4.4027e-06	5.5e-05	1516	4	-0.93468	1654	0.99595	1	1	18038	0
ESPL1	0.00087274	2.5898e-07	4e-06	1025	4	-0.93408	1655	0.99455	0.99999	1	17956	0
RHEB	0.037406	0.00078809	0.005091	2956	3	-0.93396	1656	0.71041	0.95314	1	12472	0
RAD21	0.0037678	3.8848e-06	4.9e-05	1493	3	-0.93378	1657	0.3965	0.73338	1	7020	0
OBP2A	0.00063536	2.5898e-07	4e-06	964	4	-0.93317	1658	0.99936	1	1	18360	0
GOLGA8H	0.006857	1.528e-05	0.000169	1727	4	-0.93249	1659	0.99314	0.99999	1	17891	0
TCEB3C	0.0011946	2.5898e-07	4e-06	1108	4	-0.93121	1660	0.99881	1	1	18269	0
ANLN	0.0073916	2.2014e-05	0.000238	1767	3	-0.93042	1661	0.3682	0.69932	1	6530	0
USF2	0.037806	0.00081347	0.005241	2967	3	-0.92969	1662	0.40449	0.74078	1	7169	0
RAE1	0.0065771	1.4762e-05	0.000165	1703	3	-0.92939	1663	0.042017	0.2238	1	1249	1
GABPB1	0.0011636	2.5898e-07	4e-06	1102	3	-0.92828	1664	0.82496	0.9839	1	14445	0
LMNB1	0.0035917	3.8848e-06	4.9e-05	1474	4	-0.92816	1665	0.99641	1	1	18070	0
WDR70	0.010429	6.5523e-05	0.000654	1915	3	-0.92806	1666	0.8767	0.9935	1	15402	0
MORC2	0.022233	0.00031881	0.002521	2417	4	-0.92744	1667	0.97777	0.99974	1	17420	0
MMS22L	0.0051853	8.5465e-06	0.000101	1609	4	-0.92676	1668	0.99481	0.99999	1	17967	0
SRRM2	0.0033426	3.3668e-06	4.4e-05	1444	4	-0.92552	1669	0.97853	0.99975	1	17434	0
FRG2B	0.0070166	1.7352e-05	0.000191	1737	4	-0.9255	1670	0.99298	0.99999	1	17886	0
FAM32A	0.0010169	2.5898e-07	4e-06	1062	4	-0.92545	1671	0.99898	1	1	18294	0
FNBP4	0.00027546	2.5898e-07	4e-06	752	4	-0.92533	1672	0.99972	1	1	18483	0
HMGB1	0.00028395	2.5898e-07	4e-06	756	4	-0.92498	1673	0.99972	1	1	18481	0
GEMIN5	0.011026	8.0026e-05	0.000786	1945	3	-0.92424	1674	0.38698	0.72742	1	6855	0
TRAPPC2L	0.0065342	1.4762e-05	0.000165	1701	4	-0.92366	1675	0.99347	0.99999	1	17907	0
LEMD2	0.00041526	2.5898e-07	4e-06	841	4	-0.92331	1676	0.99958	1	1	18429	0
MRPS7	7.4777e-05	2.5898e-07	4e-06	506	4	-0.9232	1677	0.99993	1	1	18669	0
CD8B	0.049674	0.0011952	0.007038	3229	3	-0.92238	1678	0.085863	0.2908	1	1871	1
PGLS	0.040229	0.00093468	0.005866	3045	3	-0.9215	1679	0.73993	0.96137	1	12967	0
SRRD	0.0015474	7.7695e-07	1.2e-05	1189	4	-0.9196	1680	0.99845	1	1	18224	0
TROAP	0.0033806	3.3668e-06	4.4e-05	1454	3	-0.91919	1681	0.60491	0.90737	1	10646	0
BORA	0.0032633	2.8488e-06	3.8e-05	1434	4	-0.91846	1682	0.99674	1	1	18090	0
ALG1L	0.032465	0.00061146	0.004186	2787	3	-0.91735	1683	0.91221	0.99686	1	16042	0
EXOC3	0.015061	0.00013907	0.00125	2126	4	-0.91733	1684	0.98494	0.99989	1	17626	0
CEP350	0.028501	0.00055034	0.003916	2661	3	-0.91716	1685	0.54776	0.86719	1	9635	0
B4GALT7	0.027754	0.00054982	0.003916	2640	3	-0.91621	1686	0.36585	0.69761	1	6483	0
UFM1	0.016036	0.00016497	0.001459	2162	4	-0.91427	1687	0.98145	0.9998	1	17520	0
ALG5	0.0020262	1.2949e-06	1.9e-05	1263	3	-0.91422	1688	0.95153	0.99894	1	16801	0
PPME1	0.0023704	1.2949e-06	1.9e-05	1314	4	-0.91346	1689	0.99763	1	1	18166	0
KRR1	0.00017285	2.5898e-07	4e-06	662	4	-0.91231	1690	0.99983	1	1	18540	0
AAAS	0.036975	0.00077152	0.005009	2943	4	-0.91066	1691	0.96303	0.99942	1	17057	0
EP400	0.0099491	5.62e-05	0.000567	1894	3	-0.91063	1692	0.30345	0.61107	1	5374	0
NPIPA1	0.017139	0.00018828	0.001629	2209	4	-0.91056	1693	0.98286	0.99984	1	17569	0
OCM2	0.060754	0.0014319	0.007918	3425	3	-0.90846	1694	0.90632	0.99632	1	15926	0
SSSCA1	0.0024237	1.8129e-06	2.5e-05	1326	4	-0.90742	1695	0.99712	1	1	18119	0
LMNB2	0.00065671	2.5898e-07	4e-06	970	4	-0.90618	1696	0.99934	1	1	18355	0
NBPF11	0.031817	0.00060162	0.00414	2773	3	-0.9059	1697	0.83285	0.98655	1	14588	0
BOLA2	0.019972	0.00026546	0.002157	2342	3	-0.90558	1698	0.79201	0.97648	1	13821	0
OR4F3	0.0027867	2.3309e-06	3.2e-05	1382	4	-0.90536	1699	0.99286	0.99999	1	17879	0
SKP2	0.052195	0.0012408	0.007136	3276	3	-0.90498	1700	0.9313	0.9981	1	16403	0
METTL14	0.013868	0.00011162	0.001023	2081	4	-0.90378	1701	0.97609	0.99971	1	17364	0
STK11	0.002644	1.8129e-06	2.5e-05	1357	4	-0.90371	1702	0.99736	1	1	18136	0
SLC30A1	0.03929	0.00088392	0.00557	3019	3	-0.90267	1703	0.32172	0.636	1	5695	0
SRF	0.0033793	3.3668e-06	4.4e-05	1453	4	-0.90245	1704	0.99203	0.99998	1	17842	0
DNM2	0.0022337	1.2949e-06	1.9e-05	1295	4	-0.90239	1705	0.98226	0.99982	1	17546	0
ATP5J2	0.0035045	3.8848e-06	4.9e-05	1466	2	-0.90236	1706	0.27286	0.57011	1	4853	0
RPRD1B	0.049785	0.0011952	0.007038	3232	3	-0.90212	1707	0.83265	0.9864	1	14585	0
FAM86B1	0.018444	0.00022558	0.001885	2284	3	-0.9014	1708	0.81544	0.98182	1	14255	0
PFN1	0.017606	0.00019502	0.00167	2232	3	-0.90102	1709	0.87296	0.99313	1	15333	0
SUGT1	0.076263	0.0018976	0.009838	3679	3	-0.90033	1710	0.64906	0.92853	1	11416	0
SART1	0.0074758	2.305e-05	0.000249	1772	4	-0.89965	1711	0.97343	0.99963	1	17295	0
SNRPA	0.050484	0.0011952	0.007038	3242	3	-0.89888	1712	0.92477	0.99782	1	16271	0
KCMF1	0.0025551	1.8129e-06	2.5e-05	1347	4	-0.89884	1713	0.99744	1	1	18144	0
EXT1	0.003493	3.8848e-06	4.9e-05	1462	4	-0.89878	1714	0.98734	0.99992	1	17700	0
POLE3	0.0055426	9.0645e-06	0.000105	1636	4	-0.89845	1715	0.99446	0.99999	1	17948	0
COMMD9	0.0083395	2.5122e-05	0.000263	1820	3	-0.89834	1716	0.33583	0.66514	1	5952	0
IPO7	0.0030421	2.3309e-06	3.2e-05	1404	3	-0.89828	1717	0.90272	0.99611	1	15856	0
KHDRBS1	0.038517	0.00084973	0.005412	2986	3	-0.89823	1718	0.9535	0.99902	1	16846	0
MST1	0.006881	1.528e-05	0.000169	1732	4	-0.898	1719	0.99312	0.99999	1	17889	0
TRIM43	0.0059861	1.1136e-05	0.000127	1671	3	-0.8976	1720	0.94799	0.99887	1	16724	0
AURKAIP1	0.0011436	2.5898e-07	4e-06	1096	3	-0.89738	1721	0.92212	0.99774	1	16228	0
MRPL32	0.0011532	2.5898e-07	4e-06	1099	4	-0.89738	1722	0.99885	1	1	18273	0
HIST1H3J	0.021088	0.00027841	0.002228	2382	3	-0.89659	1723	0.61599	0.91455	1	10837	0
VEZT	0.03274	0.00062389	0.004261	2795	3	-0.89607	1724	0.34842	0.68073	1	6176	0
NBPF8	0.023941	0.00035559	0.002699	2486	3	-0.89602	1725	0.53773	0.85916	1	9476	0
ARF4	0.022478	0.0003328	0.002622	2425	3	-0.89582	1726	0.88346	0.99446	1	15511	0
LAMTOR1	0.010641	7.0703e-05	0.000701	1924	4	-0.89365	1727	0.98369	0.99986	1	17596	0
DDX24	0.001804	7.7695e-07	1.2e-05	1226	4	-0.89322	1728	0.9982	1	1	18206	0
SLC15A4	0.009914	5.5682e-05	0.000562	1893	3	-0.89299	1729	0.91347	0.99691	1	16062	0
ANKRD17	0.0053899	9.0645e-06	0.000105	1621	4	-0.89287	1730	0.99461	0.99999	1	17959	0
SNRPB	0.0066085	1.4762e-05	0.000165	1707	3	-0.89222	1731	0.92954	0.99801	1	16361	0
RBM27	0.0015736	7.7695e-07	1.2e-05	1194	4	-0.89216	1732	0.99843	1	1	18222	0
UFC1	0.0295	0.00055863	0.003916	2689	3	-0.8921	1733	0.82702	0.98442	1	14490	0
ZNF622	0.0014695	7.7695e-07	1.2e-05	1172	4	-0.89183	1734	0.99853	1	1	18237	0
ZNF589	0.097492	0.0036499	0.017231	4046	3	-0.89099	1735	0.31018	0.6227	1	5487	0
RHOQ	0.062204	0.0014324	0.007918	3453	3	-0.89012	1736	0.8326	0.9864	1	14584	0
KRTAP4-5	0.078672	0.0021084	0.010819	3721	3	-0.88968	1737	0.22309	0.47219	1	4010	1
HAP1	0.0051014	8.5465e-06	0.000101	1599	3	-0.88931	1738	0.71375	0.95394	1	12528	0
CDK12	0.012679	9.0386e-05	0.000855	2021	4	-0.88822	1739	0.98732	0.99992	1	17699	0
CCDC115	0.028039	0.00054982	0.003916	2645	2	-0.88791	1740	0.59442	0.90401	1	10467	0
ADRBK1	0.0012977	2.5898e-07	4e-06	1138	4	-0.88765	1741	0.9987	1	1	18257	0
DDX51	0.0019025	1.2949e-06	1.9e-05	1242	4	-0.88764	1742	0.9981	1	1	18197	0
CCDC93	0.0055394	9.0645e-06	0.000105	1634	4	-0.8873	1743	0.99446	0.99999	1	17949	0
PDCL3	0.0074439	2.2532e-05	0.000243	1771	3	-0.88707	1744	0.46811	0.80867	1	8276	0
MRPS17	0.0015432	7.7695e-07	1.2e-05	1188	4	-0.88655	1745	0.97755	0.99973	1	17416	0
BRD1	0.026788	0.00047058	0.00346	2598	3	-0.88652	1746	0.032679	0.19681	1	1129	1
CACTIN	0.0028638	2.3309e-06	3.2e-05	1392	4	-0.8851	1747	0.99714	1	1	18123	0
KRTAP2-4	0.0068619	1.528e-05	0.000169	1728	3	-0.88483	1748	0.95611	0.99909	1	16903	0
POC1B	0.02607	0.00044209	0.003288	2570	3	-0.88475	1749	0.93139	0.9981	1	16406	0
ATP6AP2	0.016982	0.00018776	0.001628	2203	2	-0.88438	1750	0.80465	0.97972	1	14066	0
SET	0.014894	0.00013131	0.001181	2119	3	-0.88424	1751	0.58201	0.89165	1	10251	0
NRD1	0.025767	0.00040997	0.003059	2559	4	-0.88369	1752	0.96752	0.99953	1	17161	0
TIMM50	0.035941	0.00075701	0.004947	2904	2	-0.88318	1753	0.40107	0.73635	1	7103	0
PEX1	0.05265	0.0012408	0.007136	3287	3	-0.88255	1754	0.94866	0.99887	1	16734	0
FLYWCH1	0.00454	5.9567e-06	7.3e-05	1564	4	-0.88169	1755	0.99546	1	1	18006	0
MED17	0.0024095	1.8129e-06	2.5e-05	1321	4	-0.88153	1756	0.99759	1	1	18161	0
EXTL3	0.016647	0.00016808	0.001468	2184	3	-0.88137	1757	0.59143	0.90401	1	10417	0
LTN1	0.010092	6.0343e-05	0.000606	1899	3	-0.88081	1758	0.83295	0.98655	1	14592	0
PDE4DIP	0.037681	0.00081295	0.005241	2962	3	-0.88069	1759	0.59426	0.90401	1	10463	0
THOC1	0.02827	0.00054982	0.003916	2651	2	-0.87966	1760	0.78249	0.97477	1	13671	0
GTSE1	0.0024225	1.8129e-06	2.5e-05	1324	4	-0.87882	1761	0.99758	1	1	18158	0
FAM89B	0.025468	0.00039806	0.002984	2550	3	-0.87834	1762	0.94012	0.99852	1	16573	0
EHMT2	0.0020508	1.2949e-06	1.9e-05	1269	4	-0.87712	1763	0.99499	0.99999	1	17977	0
PPIAL4C	0.0087347	2.9783e-05	0.000309	1840	3	-0.87684	1764	0.75206	0.96632	1	13168	0
EIF3L	0.019245	0.00025147	0.002076	2315	3	-0.87497	1765	0.89784	0.99579	1	15772	0
AAGAB	0.012927	9.6601e-05	0.000906	2032	3	-0.87431	1766	0.46012	0.80398	1	8138	0
EXOC5	0.027339	0.00053532	0.003884	2625	2	-0.87347	1767	0.42582	0.77389	1	7549	0
CBWD6	0.0068427	1.528e-05	0.000169	1725	3	-0.87298	1768	0.43029	0.77652	1	7630	0
NRF1	0.016039	0.00016756	0.001468	2163	2	-0.87277	1769	0.40128	0.73635	1	7108	0
ASUN	0.00010408	2.5898e-07	4e-06	569	4	-0.87258	1770	0.9999	1	1	18618	0
MRGBP	0.036866	0.00077152	0.005009	2940	3	-0.87185	1771	0.95409	0.99902	1	16865	0
POTEJ	0.0094342	4.7912e-05	0.000491	1866	3	-0.87156	1772	0.91572	0.99701	1	16111	0
GBE1	0.00060399	2.5898e-07	4e-06	949	3	-0.87138	1773	0.8928	0.99538	1	15679	0
UBE2Q2L	0.038768	0.00085025	0.005412	2999	3	-0.8707	1774	0.34161	0.67385	1	6055	0
COG8	0.013829	0.00010851	0.000999	2076	4	-0.86959	1775	0.98617	0.99991	1	17660	0
EFNA3	0.050028	0.0011952	0.007038	3238	3	-0.86929	1776	0.87169	0.99303	1	15312	0
JMJD6	0.033097	0.00063943	0.004329	2807	3	-0.86897	1777	0.079617	0.28189	1	1777	1
NKTR	0.0066966	1.528e-05	0.000169	1715	4	-0.86881	1778	0.9933	0.99999	1	17898	0
UBA6	0.0031609	2.8488e-06	3.8e-05	1421	4	-0.86824	1779	0.99684	1	1	18098	0
HIST1H2BC	0.049828	0.0011952	0.007038	3233	3	-0.86685	1780	0.53637	0.85825	1	9455	0
GTF2H2C	0.051859	0.0012408	0.007136	3270	3	-0.86683	1781	0.82893	0.98512	1	14528	0
NAF1	0.0027693	2.3309e-06	3.2e-05	1381	3	-0.86635	1782	0.86666	0.99253	1	15215	0
MRPL14	0.030201	0.00055915	0.003916	2718	3	-0.86586	1783	0.29239	0.59306	1	5170	0
GTF2F2	0.010749	7.3811e-05	0.00073	1934	3	-0.86482	1784	0.65568	0.92854	1	11542	0
KRT84	0.10519	0.0045413	0.020562	4175	3	-0.86482	1785	0.65361	0.92854	1	11499	0
RHPN1	0.028777	0.00055034	0.003916	2669	3	-0.86461	1786	0.32695	0.65258	1	5781	0
RTTN	0.002405	1.8129e-06	2.5e-05	1319	3	-0.86362	1787	0.054907	0.24617	1	1427	1
CLASRP	0.035946	0.00075701	0.004947	2905	3	-0.8624	1788	0.80421	0.97972	1	14057	0
KIF27	0.07752	0.0020659	0.01065	3704	3	-0.86222	1789	0.0491	0.23713	1	1343	1
DDI2	0.0024135	1.8129e-06	2.5e-05	1322	4	-0.8621	1790	0.99759	1	1	18160	0
KRTAP4-8	0.0022438	1.2949e-06	1.9e-05	1301	3	-0.86169	1791	0.93492	0.99834	1	16457	0
HSD17B4	0.020459	0.00027064	0.002185	2362	3	-0.85954	1792	0.94123	0.99858	1	16592	0
RNF39	0.020991	0.00027789	0.002228	2379	3	-0.8592	1793	0.65713	0.92854	1	11557	0
HSP90B1	0.0025622	1.8129e-06	2.5e-05	1348	4	-0.85752	1794	0.99744	1	1	18141	0
RREB1	0.049941	0.0011952	0.007038	3235	3	-0.85669	1795	0.55739	0.8758	1	9818	0
PARG	0.012545	8.9868e-05	0.000851	2015	3	-0.85574	1796	0.93959	0.9985	1	16559	0
USP17L5	0.0030905	2.8488e-06	3.8e-05	1412	3	-0.85562	1797	0.82671	0.98426	1	14486	0
NBPF4	0.0013329	2.5898e-07	4e-06	1146	3	-0.85536	1798	0.94821	0.99887	1	16726	0
RPS6KA4	0.010253	6.2933e-05	0.00063	1907	3	-0.85503	1799	0.58152	0.89165	1	10243	0
TIMM9	0.0063721	1.4244e-05	0.000161	1689	3	-0.85441	1800	0.92724	0.99793	1	16313	0
KCNJ14	0.047911	0.0011947	0.007038	3206	3	-0.85416	1801	0.52235	0.84794	1	9198	0
TMEM263	0.058025	0.0013408	0.007521	3376	3	-0.85375	1802	0.70292	0.94854	1	12337	0
RAB10	0.011911	8.7796e-05	0.000839	1985	3	-0.85338	1803	0.94545	0.99879	1	16668	0
DGAT1	0.0044317	4.9207e-06	6e-05	1552	3	-0.85316	1804	0.89929	0.99599	1	15795	0
PRRC2A	0.0040573	4.4027e-06	5.5e-05	1519	4	-0.85287	1805	0.99594	1	1	18037	0
CINP	0.020444	0.00027064	0.002185	2359	3	-0.85226	1806	0.76861	0.9727	1	13429	0
ZNF407	0.061456	0.0014324	0.007918	3439	3	-0.85223	1807	0.83438	0.98716	1	14614	0
CORO7-PAM16	0.0081782	2.5122e-05	0.000263	1815	4	-0.85191	1808	0.97233	0.99959	1	17265	0
DMAP1	0.0012555	2.5898e-07	4e-06	1128	4	-0.85163	1809	0.99874	1	1	18263	0
IPO5	0.0098205	5.0502e-05	0.000511	1888	4	-0.85141	1810	0.99018	0.99996	1	17783	0
SEC62	0.018208	0.00022506	0.001885	2267	3	-0.85141	1811	0.94993	0.99894	1	16763	0
SLC16A8	0.0033833	3.3668e-06	4.4e-05	1455	3	-0.85092	1812	0.90188	0.99605	1	15842	0
PRKRA	0.0026981	1.8129e-06	2.5e-05	1364	4	-0.85034	1813	0.9973	1	1	18131	0
SRPRB	0.0097888	5.0502e-05	0.000511	1886	4	-0.84999	1814	0.97692	0.99971	1	17394	0
TAF10	0.010801	7.4329e-05	0.000733	1938	4	-0.84947	1815	0.9892	0.99994	1	17753	0
PRCD	0.039768	0.00088443	0.00557	3032	2	-0.84926	1816	0.84172	0.98847	1	14762	0
ROR2	0.0032486	2.8488e-06	3.8e-05	1428	4	-0.84922	1817	0.99675	1	1	18094	0
MEMO1	0.031094	0.0005923	0.004092	2750	4	-0.84899	1818	0.96891	0.99954	1	17190	0
MEAF6	0.012171	8.8314e-05	0.000839	1998	3	-0.84811	1819	0.50291	0.83586	1	8868	0
SLC39A7	0.0017619	7.7695e-07	1.2e-05	1217	3	-0.84769	1820	0.81538	0.98182	1	14253	0
PISD	0.01646	0.00016808	0.001468	2180	3	-0.84625	1821	0.33328	0.66157	1	5899	0
ZBTB11	0.010586	7.0703e-05	0.000701	1923	3	-0.84509	1822	0.44422	0.7893	1	7871	0
DHDDS	0.01834	0.00022558	0.001885	2274	2	-0.84427	1823	0.7268	0.95782	1	12748	0
CORO1A	0.057382	0.0013408	0.007521	3369	3	-0.84383	1824	0.017882	0.13802	1	703	1
CDK5RAP3	0.021527	0.00029084	0.002319	2397	3	-0.84368	1825	0.81438	0.98138	1	14232	0
INTS10	0.0026798	1.8129e-06	2.5e-05	1362	4	-0.84343	1826	0.99732	1	1	18133	0
SNRNP70	0.010693	7.3811e-05	0.00073	1928	3	-0.84305	1827	0.84496	0.9893	1	14822	0
WDR24	0.00071199	2.5898e-07	4e-06	986	4	-0.84217	1828	0.99929	1	1	18342	0
MDK	0.002167	1.2949e-06	1.9e-05	1286	3	-0.84163	1829	0.85446	0.99098	1	14993	0
PPP2CA	0.018997	0.00024681	0.002042	2309	4	-0.84144	1830	0.96619	0.99949	1	17129	0
ACTR3	0.011263	8.5206e-05	0.00083	1960	3	-0.84119	1831	0.90174	0.99605	1	15840	0
TRA2A	0.099079	0.0038576	0.018082	4074	3	-0.84115	1832	0.39064	0.72742	1	6918	0
HOXB9	0.0098052	5.0502e-05	0.000511	1887	4	-0.84074	1833	0.99019	0.99996	1	17784	0
TRIP12	0.00013656	2.5898e-07	4e-06	613	4	-0.84001	1834	0.99986	1	1	18585	0
PNPLA6	0.049993	0.0011952	0.007038	3236	3	-0.83988	1835	0.46518	0.80635	1	8230	0
DDX1	0.012319	8.8314e-05	0.000839	2004	4	-0.83948	1836	0.98768	0.99992	1	17712	0
RANBP2	0.077688	0.0021079	0.010819	3711	3	-0.83911	1837	0.62399	0.91763	1	10971	0
NPTX1	0.0037309	3.8848e-06	4.9e-05	1489	4	-0.83864	1838	0.99627	1	1	18060	0
ARL17A	0.0035725	3.8848e-06	4.9e-05	1470	4	-0.83738	1839	0.99643	1	1	18073	0
MTERF4	0.016099	0.00016756	0.001468	2166	4	-0.83731	1840	0.9839	0.99986	1	17603	0
C17orf82	0.00055812	2.5898e-07	4e-06	922	4	-0.83712	1841	0.99944	1	1	18384	0
TUBGCP6	0.0046015	6.4746e-06	7.9e-05	1569	3	-0.83649	1842	0.50459	0.83686	1	8903	0
ZNF99	0.018749	0.00024163	0.002006	2302	3	-0.83589	1843	0.63033	0.91944	1	11089	0
NUTM2B	0.089798	0.0026756	0.013047	3915	3	-0.83535	1844	0.8923	0.99524	1	15666	0
AMIGO3	0.0088082	2.9783e-05	0.000309	1842	4	-0.83514	1845	0.99119	0.99997	1	17811	0
PITRM1	0.0070235	1.7352e-05	0.000191	1738	3	-0.8349	1846	0.47227	0.81215	1	8342	0
TRMT61A	0.037223	0.00078757	0.005091	2948	2	-0.83331	1847	0.42626	0.77389	1	7559	0
HIST1H2AJ	0.02428	0.00035559	0.002699	2503	4	-0.83178	1848	0.97572	0.99971	1	17352	0
PPP1CB	0.047607	0.0011947	0.007038	3199	3	-0.83133	1849	0.80136	0.97972	1	13995	0
MECR	0.0018987	1.2949e-06	1.9e-05	1241	4	-0.8311	1850	0.99713	1	1	18121	0
RAB35	0.038961	0.00086786	0.00552	3005	4	-0.83044	1851	0.96104	0.99937	1	17015	0
PCBP2	0.0096826	4.8948e-05	0.000497	1880	4	-0.82996	1852	0.98408	0.99986	1	17607	0
ATP5E	0.0019105	1.2949e-06	1.9e-05	1245	3	-0.8294	1853	0.3312	0.658	1	5862	0
AP1M1	0.0027279	2.3309e-06	3.2e-05	1368	4	-0.82924	1854	0.97165	0.99957	1	17253	0
C11orf57	0.053201	0.0012413	0.007136	3294	3	-0.82908	1855	0.19328	0.44289	1	3520	1
TP53TG3D	0.0072691	2.1496e-05	0.000233	1757	4	-0.82866	1856	0.99273	0.99998	1	17875	0
WARS	0.010267	6.2933e-05	0.00063	1909	3	-0.82842	1857	0.20395	0.45871	1	3692	1
FCGRT	0.019457	0.00025769	0.002123	2320	3	-0.82677	1858	0.8493	0.99002	1	14895	0
PARK7	0.0041817	4.4027e-06	5.5e-05	1528	4	-0.82667	1859	0.97776	0.99974	1	17419	0
DDA1	0.031111	0.0005923	0.004092	2751	3	-0.82663	1860	0.80424	0.97972	1	14058	0
NCOA4	0.00026372	2.5898e-07	4e-06	741	4	-0.82659	1861	0.99974	1	1	18489	0
PRKCA	0.042039	0.0010434	0.006436	3097	3	-0.82596	1862	0.80912	0.98058	1	14148	0
SUMO2	0.12252	0.0055394	0.023421	4511	3	-0.82559	1863	0.47843	0.81776	1	8447	0
ZC3H13	0.0020093	1.2949e-06	1.9e-05	1262	3	-0.82533	1864	0.92946	0.99801	1	16360	0
C14orf178	0.052404	0.0012408	0.007136	3283	2	-0.82508	1865	0.60309	0.9067	1	10611	0
KRTAP4-2	0.00044463	2.5898e-07	4e-06	857	3	-0.82423	1866	0.92768	0.99797	1	16324	0
KIN	0.013684	0.000108	0.000997	2070	2	-0.82409	1867	0.23866	0.50137	1	4276	1
C9orf129	0.0038459	3.8848e-06	4.9e-05	1501	3	-0.82319	1868	0.70368	0.94895	1	12351	0
LARP4	0.0036805	3.8848e-06	4.9e-05	1483	4	-0.82296	1869	0.99632	1	1	18065	0
LIMS1	0.015302	0.00015669	0.001402	2133	3	-0.82272	1870	0.46356	0.80516	1	8205	0
CFC1B	0.038228	0.00083367	0.00534	2979	3	-0.82271	1871	0.22644	0.47672	1	4069	1
C6orf15	0.047366	0.0011947	0.007038	3194	3	-0.82223	1872	0.57045	0.88243	1	10037	0
CCND3	0.011063	8.4688e-05	0.000828	1946	4	-0.82219	1873	0.98894	0.99993	1	17745	0
TRA2B	0.012268	8.8314e-05	0.000839	2002	3	-0.82065	1874	0.91516	0.99701	1	16099	0
TOP1	0.00037268	2.5898e-07	4e-06	818	2	-0.82045	1875	0.086635	0.2908	1	1885	1
HS6ST1	0.0059021	1.1136e-05	0.000127	1667	4	-0.82029	1876	0.99174	0.99998	1	17829	0
PPIAL4F	0.030481	0.00055915	0.003916	2729	2	-0.8197	1877	0.50052	0.83586	1	8832	0
EMC6	0.00029723	2.5898e-07	4e-06	762	4	-0.81936	1878	0.9997	1	1	18477	0
FAM103A1	0.0094848	4.843e-05	0.000494	1871	4	-0.81832	1879	0.99052	0.99996	1	17791	0
C11orf95	0.010005	5.9825e-05	0.000603	1895	3	-0.81687	1880	0.48658	0.82439	1	8589	0
C14orf2	0.069657	0.0016759	0.008968	3571	3	-0.81579	1881	0.63117	0.92061	1	11108	0
PHACTR1	0.017912	0.00021055	0.001784	2250	3	-0.81516	1882	0.79257	0.97718	1	13837	0
NUTM2G	0.0017861	7.7695e-07	1.2e-05	1223	3	-0.81507	1883	0.87886	0.99378	1	15439	0
AGAP2	0.011989	8.7796e-05	0.000839	1986	4	-0.81481	1884	0.98801	0.99992	1	17723	0
FERMT3	0.026695	0.00047006	0.00346	2593	3	-0.81429	1885	0.39475	0.73338	1	6987	0
TXN2	0.012254	8.8314e-05	0.000839	2001	4	-0.81425	1886	0.98775	0.99992	1	17715	0
JADE2	0.046239	0.0011626	0.007002	3175	3	-0.81407	1887	0.87021	0.99293	1	15280	0
MRPS35	0.03576	0.00075649	0.004947	2899	3	-0.81365	1888	0.61997	0.91762	1	10899	0
FKBPL	0.0084707	2.5122e-05	0.000263	1824	3	-0.81253	1889	0.85707	0.99143	1	15042	0
PPP1CA	0.00031242	2.5898e-07	4e-06	779	4	-0.81185	1890	0.99969	1	1	18468	0
ZNF236	0.0067323	1.528e-05	0.000169	1719	4	-0.81177	1891	0.99327	0.99999	1	17897	0
LOC388849	0.0091701	3.5481e-05	0.000365	1859	4	-0.81061	1892	0.99083	0.99997	1	17798	0
BUD13	0.0010604	2.5898e-07	4e-06	1076	4	-0.80893	1893	0.99894	1	1	18287	0
RAB6A	0.0063955	1.4244e-05	0.000161	1691	3	-0.80866	1894	0.80609	0.98039	1	14094	0
PPP1R15A	0.088886	0.0026233	0.012863	3895	3	-0.80855	1895	0.29217	0.59306	1	5167	0
LOC400736	0.001252	2.5898e-07	4e-06	1126	4	-0.80817	1896	0.97441	0.99967	1	17320	0
EIF3F	0.0031685	2.8488e-06	3.8e-05	1422	2	-0.80705	1897	0.45273	0.79551	1	8010	0
ORC3	0.019956	0.00026546	0.002157	2339	4	-0.80682	1898	0.98004	0.99977	1	17489	0
TNPO3	0.0057857	1.0618e-05	0.000122	1657	4	-0.80585	1899	0.99421	0.99999	1	17932	0
MDC1	0.052472	0.0012408	0.007136	3284	3	-0.80515	1900	0.57337	0.88711	1	10092	0
RHNO1	0.059948	0.0013413	0.007521	3409	3	-0.80513	1901	0.59838	0.90469	1	10536	0
FBXL4	0.029913	0.00055915	0.003916	2707	4	-0.80507	1902	0.96743	0.99953	1	17157	0
AURKB	0.0036585	3.8848e-06	4.9e-05	1481	4	-0.80497	1903	0.99634	1	1	18066	0
HAUS1	0.01735	0.0001945	0.00167	2221	2	-0.80496	1904	0.25023	0.52153	1	4474	1
ISCA1	0.044931	0.0011149	0.006739	3154	3	-0.80489	1905	0.56466	0.88084	1	9937	0
G6PD	0.0010245	2.5898e-07	4e-06	1066	3	-0.80212	1906	0.41818	0.76991	1	7416	0
SIRT7	0.059768	0.0013413	0.007521	3406	3	-0.80212	1907	0.52085	0.84794	1	9171	0
GATAD2A	0.055157	0.0012646	0.007245	3330	3	-0.80202	1908	0.68348	0.93931	1	12014	0
ZW10	0.010719	7.3811e-05	0.00073	1929	3	-0.8017	1909	0.31769	0.6341	1	5618	0
TEFM	0.011018	8.0026e-05	0.000786	1944	2	-0.80117	1910	0.71961	0.95592	1	12626	0
LIG1	0.018024	0.00021107	0.001784	2255	3	-0.80096	1911	0.40098	0.73635	1	7102	0
CT47A6	0.023157	0.00035507	0.002699	2446	3	-0.80089	1912	0.9037	0.99623	1	15874	0
HMMR	0.052918	0.0012413	0.007136	3291	3	-0.80047	1913	0.67749	0.93588	1	11908	0
SH3BP1	0.024625	0.00035559	0.002699	2516	3	-0.8004	1914	0.32465	0.64711	1	5743	0
GOLGA6L4	0.00075834	2.5898e-07	4e-06	996	4	-0.80032	1915	0.99924	1	1	18334	0
NPAT	0.013358	0.00010437	0.000968	2054	3	-0.79983	1916	0.89446	0.99559	1	15710	0
EIF4ENIF1	0.040533	0.0009585	0.005991	3051	3	-0.79949	1917	0.89424	0.99552	1	15707	0
FAM157A	0.0064177	1.4244e-05	0.000161	1692	3	-0.799	1918	0.64101	0.92518	1	11270	0
UQCRB	0.041366	0.0010207	0.006317	3078	4	-0.79899	1919	0.95863	0.99924	1	16957	0
WAC	0.0019328	1.2949e-06	1.9e-05	1249	4	-0.79837	1920	0.99807	1	1	18194	0
SLC11A1	0.0042217	4.4027e-06	5.5e-05	1537	4	-0.79815	1921	0.99578	1	1	18026	0
MUC6	0.02648	0.00045814	0.003384	2584	4	-0.79806	1922	0.97352	0.99964	1	17299	0
CT45A5	0.012606	8.9868e-05	0.000851	2019	4	-0.79766	1923	0.98739	0.99992	1	17703	0
DPH1	0.014743	0.00013079	0.001181	2112	4	-0.79683	1924	0.98526	0.99989	1	17639	0
SNAPC2	0.00049694	2.5898e-07	4e-06	887	4	-0.79676	1925	0.9995	1	1	18405	0
HIST1H2BD	0.0011448	2.5898e-07	4e-06	1097	4	-0.79672	1926	0.99886	1	1	18274	0
MED29	0.01985	0.00026494	0.002157	2333	3	-0.79496	1927	0.89188	0.99524	1	15660	0
CASC5	0.0057468	1.0618e-05	0.000122	1652	4	-0.79468	1928	0.99425	0.99999	1	17938	0
GATB	0.014426	0.00011473	0.001045	2097	3	-0.79435	1929	0.83726	0.98762	1	14664	0
PPIAL4D	0.062286	0.0014324	0.007918	3455	3	-0.79435	1930	0.85831	0.99165	1	15060	0
TEKT4	0.033204	0.00063995	0.004329	2811	3	-0.7937	1931	0.83533	0.98716	1	14634	0
DNAH17	0.014171	0.00011421	0.001043	2090	4	-0.79307	1932	0.98583	0.99991	1	17653	0
ANP32B	0.011277	8.5206e-05	0.00083	1961	3	-0.7926	1933	0.81383	0.98138	1	14221	0
ARHGEF7	0.041141	0.0010087	0.006278	3068	3	-0.79238	1934	0.58445	0.89541	1	10288	0
TMCO6	0.026404	0.00045814	0.003384	2583	3	-0.79218	1935	0.94001	0.99852	1	16570	0
FASN	0.024883	0.0003675	0.002775	2524	2	-0.79189	1936	0.90501	0.99629	1	15899	0
GINS1	0.013879	0.00011162	0.001023	2082	3	-0.79182	1937	0.95001	0.99894	1	16765	0
SURF2	0.094914	0.0033878	0.016197	3993	3	-0.7909	1938	0.78432	0.97477	1	13700	0
ZFPL1	0.014314	0.00011473	0.001045	2094	3	-0.79079	1939	0.36743	0.69932	1	6516	0
MRPL42	0.033758	0.00065704	0.004416	2835	3	-0.79036	1940	0.81627	0.982	1	14272	0
SYNGR3	0.13112	0.0070234	0.028707	4652	3	-0.79033	1941	0.72873	0.95782	1	12780	0
TAF5	0.03332	0.00063995	0.004329	2815	4	-0.79018	1942	0.96668	0.9995	1	17143	0
DBF4B	0.0051445	8.5465e-06	0.000101	1602	4	-0.78944	1943	0.99486	0.99999	1	17972	0
BUB1	0.16047	0.010623	0.038576	5221	2	-0.78915	1944	0.69548	0.945	1	12214	0
TCOF1	0.0093529	4.4286e-05	0.000454	1864	3	-0.78862	1945	0.92332	0.99778	1	16249	0
ILK	0.028184	0.00054982	0.003916	2649	4	-0.78832	1946	0.97182	0.99957	1	17258	0
RELA	0.077077	0.0020654	0.01065	3694	3	-0.78824	1947	0.54649	0.86631	1	9612	0
MFSD4	0.0078845	2.4604e-05	0.000261	1798	4	-0.78813	1948	0.99212	0.99998	1	17846	0
HARS2	0.0052389	8.5465e-06	0.000101	1615	4	-0.78805	1949	0.99476	0.99999	1	17962	0
BMS1	0.023658	0.00035507	0.002699	2467	4	-0.78784	1950	0.9645	0.99944	1	17083	0
MRPL37	0.10675	0.0045418	0.020562	4203	3	-0.78664	1951	0.54992	0.86809	1	9677	0
TGS1	0.041434	0.0010207	0.006317	3082	4	-0.7862	1952	0.95857	0.99924	1	16954	0
TRMT10C	0.036547	0.000771	0.005009	2929	3	-0.78572	1953	0.80242	0.97972	1	14016	0
ARPC2	0.0028995	2.3309e-06	3.2e-05	1395	3	-0.78563	1954	0.41051	0.7522	1	7278	0
BNC1	0.027209	0.00053532	0.003884	2618	4	-0.78556	1955	0.97279	0.99959	1	17279	0
PTMA	0.00029822	2.5898e-07	4e-06	764	4	-0.78512	1956	0.9997	1	1	18476	0
NSD1	0.038464	0.00084973	0.005412	2985	3	-0.78453	1957	0.33606	0.66514	1	5956	0
FOXM1	0.0024514	1.8129e-06	2.5e-05	1328	4	-0.78443	1958	0.99513	1	1	17988	0
SUPV3L1	0.041379	0.0010207	0.006317	3079	3	-0.78431	1959	0.92138	0.99761	1	16218	0
TMEM147	0.0038552	3.8848e-06	4.9e-05	1503	4	-0.78427	1960	0.99614	1	1	18049	0
2022-03-09	0.022697	0.00034937	0.002699	2428	3	-0.78406	1961	0.53634	0.85825	1	9454	0
AHCTF1	0.018501	0.00022558	0.001885	2288	3	-0.78399	1962	0.89463	0.99566	1	15714	0
TIPRL	0.042638	0.0010611	0.006473	3116	3	-0.78303	1963	0.47759	0.81665	1	8434	0
RICTOR	0.099284	0.0038576	0.018082	4078	2	-0.78299	1964	0.61498	0.91324	1	10820	0
C15orf65	0.12179	0.0055389	0.023421	4497	3	-0.78154	1965	0.52293	0.84794	1	9208	0
PCNT	0.0045455	5.9567e-06	7.3e-05	1565	3	-0.78133	1966	0.82951	0.98544	1	14534	0
KDELR1	0.045152	0.0011149	0.006739	3159	3	-0.78121	1967	0.74374	0.96373	1	13023	0
SRC	0.013755	0.00010851	0.000999	2072	4	-0.78072	1968	0.98625	0.99991	1	17664	0
EIF4E2	0.10555	0.0045413	0.020562	4181	3	-0.78012	1969	0.85172	0.99075	1	14939	0
ASPSCR1	0.044054	0.001075	0.006527	3138	3	-0.77934	1970	0.89141	0.99516	1	15654	0
WDR61	0.0071151	1.8906e-05	0.000207	1746	3	-0.77892	1971	0.60617	0.90737	1	10666	0
EXOSC7	0.026881	0.00048352	0.003549	2604	3	-0.77867	1972	0.52067	0.84794	1	9167	0
DENR	0.0032838	2.8488e-06	3.8e-05	1437	4	-0.77858	1973	0.99672	1	1	18089	0
FARS2	0.0012307	2.5898e-07	4e-06	1121	4	-0.77792	1974	0.99877	1	1	18265	0
CLEC3B	0.056565	0.0012905	0.007351	3353	3	-0.77788	1975	0.94034	0.99852	1	16576	0
MRPL39	0.026213	0.00045763	0.003384	2577	3	-0.77681	1976	0.3194	0.636	1	5648	0
KPNA4	0.0056377	9.0645e-06	0.000105	1644	3	-0.77675	1977	0.85915	0.99165	1	15077	0
URB1	0.032704	0.00062338	0.004261	2794	2	-0.77594	1978	0.92062	0.99752	1	16203	0
LEO1	0.057791	0.0013408	0.007521	3373	2	-0.77559	1979	0.76633	0.97132	1	13392	0
NUP50	0.025275	0.00039754	0.002984	2539	4	-0.77484	1980	0.97473	0.99969	1	17329	0
F8A2	0.01357	0.00010489	0.00097	2064	4	-0.77459	1981	0.98643	0.99991	1	17670	0
SCLY	0.0062178	1.1654e-05	0.000132	1683	4	-0.77448	1982	0.99378	0.99999	1	17915	0
FBXO45	0.0056222	9.0645e-06	0.000105	1643	4	-0.77391	1983	0.99326	0.99999	1	17896	0
RAB3GAP2	0.0040569	4.4027e-06	5.5e-05	1518	4	-0.77374	1984	0.99538	1	1	18002	0
AMY1C	0.01985	0.00026494	0.002157	2332	3	-0.77325	1985	0.80441	0.97972	1	14061	0
FCN1	0.06516	0.0015821	0.008607	3506	3	-0.77308	1986	0.7222	0.95631	1	12671	0
UBE3D	0.077707	0.0021079	0.010819	3712	3	-0.77291	1987	0.48026	0.81776	1	8480	0
OSGEP	0.012065	8.7796e-05	0.000839	1991	3	-0.7729	1988	0.13597	0.34002	1	2611	1
TEAD4	0.096856	0.0036494	0.017231	4035	3	-0.7728	1989	0.88342	0.99446	1	15510	0
HRNR	0.00078005	2.5898e-07	4e-06	1002	4	-0.77152	1990	0.99922	1	1	18329	0
BECN1	0.0041676	4.4027e-06	5.5e-05	1527	4	-0.77152	1991	0.99583	1	1	18031	0
DAGLA	0.033592	0.00065653	0.004416	2830	3	-0.77134	1992	0.95594	0.99909	1	16898	0
OR2T29	0.019881	0.00026494	0.002157	2336	4	-0.77054	1993	0.97835	0.99975	1	17429	0
SEC61B	0.017347	0.0001945	0.00167	2220	4	-0.77026	1994	0.98265	0.99984	1	17563	0
AGMAT	0.0054934	9.0645e-06	0.000105	1628	4	-0.77021	1995	0.99451	0.99999	1	17954	0
UBE2Z	0.092475	0.0030148	0.014577	3945	3	-0.77007	1996	0.72637	0.95745	1	12742	0
GPKOW	0.0085134	2.7711e-05	0.00029	1826	4	-0.76945	1997	0.99149	0.99998	1	17822	0
ATAD5	0.077138	0.0020654	0.01065	3697	3	-0.76903	1998	0.55401	0.87323	1	9756	0
ZFC3H1	0.003497	3.8848e-06	4.9e-05	1464	3	-0.76897	1999	0.5816	0.89165	1	10244	0
[truncated: 17,115 more rows]

## Sheet: TPC-1 Genome-Wide
id	neg|score	neg|p-value	neg|fdr	neg|rank	neg|goodsgrna	neg|lfc	neg lfc rank	pos|score	pos|p-value	pos|fdr	pos|rank	pos|goodsgrna
HNRNPU	0.0013146	0.0007596	0.03358	423	3	-4.9728	1	0.87497	0.94504	1	16060	0
FAM96B	0.0020107	0.0013682	0.04991	514	4	-4.4841	2	0.99799	0.9996	1	18846	0
GPN2	0.00010329	5.7236e-05	0.007705	142	4	-4.4714	3	0.9999	0.99998	1	19036	0
LAMTOR3	0.0011147	0.00069641	0.033531	397	4	-4.0656	4	0.99889	0.99978	1	18908	0
SYS1	0.0014704	0.00088651	0.037932	446	3	-3.8576	5	0.75217	0.85916	1	13833	0
RPS8	0.0077383	0.0055058	0.104208	997	4	-3.7959	6	0.99226	0.99852	1	18582	0
FDXR	1.0462e-07	2.5898e-07	0.000183	10	4	-3.7275	7	1	1	1	19106	0
DNAJC9	0.0013632	0.00076893	0.03358	433	4	-3.6934	8	0.99864	0.99973	1	18888	0
CSNK1A1	0.015958	0.02081	0.26245	1483	3	-3.6717	9	0.27286	0.54744	1	7543	1
NOP2	0.00033253	0.00015151	0.011584	250	4	-3.6692	10	0.99967	0.99995	1	18982	0
RTCB	3.5462e-08	2.5898e-07	0.000183	7	4	-3.6003	11	1	1	1	19109	0
MBTPS2	0.00019694	9.4529e-05	0.009096	194	4	-3.5274	12	0.99946	0.99991	1	18961	0
DAD1	0.011509	0.015509	0.238072	1242	4	-3.5254	13	0.98849	0.99783	1	18443	0
WDR77	0.015413	0.020195	0.26245	1452	3	-3.5128	14	0.83508	0.92731	1	15360	0
DNLZ	0.00010219	5.7236e-05	0.007705	140	4	-3.485	15	0.98101	0.99548	1	18250	0
RPN2	0.00080068	0.00045296	0.024503	342	3	-3.4804	16	0.93601	0.97772	1	17268	0
RAD9A	0.012989	0.017568	0.255374	1314	4	-3.4573	17	0.98095	0.99548	1	18247	0
GNB2L1	0.00026746	0.00011007	0.009607	217	4	-3.4066	18	0.99973	0.99996	1	19002	0
WDR4	0.00142	0.00079016	0.034249	440	3	-3.3572	19	0.92577	0.97294	1	17039	0
RPE	6.915e-05	4.9466e-05	0.007535	117	4	-3.3331	20	0.99993	0.99999	1	19046	0
RPTOR	3.4444e-05	8.0285e-06	0.001827	84	4	-3.3324	21	0.99997	0.99999	1	19067	0
RAD51C	1.1992e-05	2.3309e-06	0.000874	51	4	-3.3319	22	0.99995	0.99999	1	19054	0
CELF1	4.7725e-05	4.1179e-05	0.007535	102	3	-3.3235	23	0.85802	0.93787	1	15754	0
TAF2	0.00066412	0.00037372	0.022285	319	4	-3.32	24	0.99524	0.9991	1	18693	0
YBX1	0.00016347	8.8832e-05	0.008937	174	4	-3.3188	25	0.99839	0.99966	1	18876	0
ALG13	0.0005718	0.00028877	0.018648	296	3	-3.2918	26	0.80242	0.90223	1	14775	0
ZNF626	0.012374	0.016172	0.239075	1292	3	-3.2816	27	0.88523	0.95205	1	16239	0
RRAS2	0.00031362	0.00012923	0.010123	243	4	-3.2399	28	0.99486	0.99905	1	18675	0
SRP14	7.4883e-05	5.102e-05	0.007535	122	4	-3.2284	29	0.99993	0.99999	1	19043	0
COG4	3.8717e-05	1.9424e-05	0.004036	89	4	-3.2004	30	0.99996	0.99999	1	19061	0
UBA52	0.0063663	0.0049303	0.10256	912	4	-3.1632	31	0.99363	0.99875	1	18629	0
LOC100507462	0.0032142	0.0026559	0.073058	644	4	-3.1341	32	0.99679	0.99931	1	18773	0
NUTF2	0.0074895	0.0054084	0.104208	976	3	-3.1281	33	0.60611	0.74794	1	11462	1
ELP3	7.0532e-05	4.9466e-05	0.007535	121	4	-3.1259	34	0.99993	0.99999	1	19044	0
PSMG3	0.00020104	9.5565e-05	0.009096	197	4	-3.1221	35	0.9998	0.99997	1	19011	0
SRSF7	0.0031928	0.0026559	0.073058	641	4	-3.1205	36	0.98484	0.99646	1	18349	0
POLR3H	0.00039561	0.0001888	0.013722	263	4	-3.1003	37	0.9996	0.99992	1	18974	0
NOP58	0.0050991	0.0033914	0.079738	812	4	-3.0867	38	0.9805	0.99541	1	18230	0
RPS15	0.0033696	0.0026668	0.073058	668	4	-3.0584	39	0.95175	0.98517	1	17586	0
RPP21	2.855e-06	7.7695e-07	0.000424	35	4	-3.0464	40	0.99334	0.99872	1	18618	0
GRB2	0.0058901	0.0046304	0.10105	871	4	-3.041	41	0.99411	0.99889	1	18645	0
MOCS3	0.00018317	8.8832e-05	0.008937	189	4	-3.0386	42	0.96458	0.98949	1	17838	0
VPS25	0.00048059	0.00025562	0.017181	277	4	-3.0072	43	0.99884	0.99978	1	18905	0
DHPS	0.00020564	9.6083e-05	0.009096	200	4	-2.997	44	0.99755	0.99954	1	18813	0
WDR18	3.9176e-05	1.9424e-05	0.004036	92	4	-2.9924	45	0.99996	0.99999	1	19060	0
LARS	0.0028812	0.0023291	0.072864	602	3	-2.9771	46	0.61572	0.75217	1	11611	1
BUD31	0.00010737	6.2415e-05	0.008343	143	4	-2.9664	47	0.99989	0.99998	1	19035	0
URM1	0.02294	0.026585	0.278757	1823	4	-2.9649	48	0.97059	0.99185	1	17969	0
PKM	0.0002467	0.000108	0.009607	211	4	-2.9621	49	0.99975	0.99996	1	19005	0
COG8	0.003573	0.0027123	0.073058	696	4	-2.9602	50	0.99345	0.99872	1	18624	0
PSMD4	0.0069892	0.0053022	0.104208	947	4	-2.9554	51	0.95007	0.98428	1	17549	0
HNRNPA2B1	0.00031306	0.00012923	0.010123	242	3	-2.948	52	0.93445	0.97749	1	17238	0
PGD	1.2656e-06	2.5898e-07	0.000183	26	4	-2.9421	53	0.99996	0.99999	1	19066	0
RPL3	0.027241	0.030363	0.284895	2022	3	-2.9254	54	0.88059	0.94907	1	16163	0
NELFCD	0.00071182	0.00042033	0.024274	328	4	-2.9115	55	0.98976	0.99805	1	18486	0
RBBP5	0.0055661	0.0039125	0.087573	851	4	-2.9088	56	0.98394	0.99635	1	18322	0
MRPL33	0.00059478	0.0003271	0.020136	305	4	-2.8751	57	0.97364	0.99285	1	18041	0
PPP1R7	0.00021688	9.6601e-05	0.009096	202	4	-2.8534	58	0.99978	0.99997	1	19009	0
GOLGA6L1	0.0041699	0.0030516	0.076495	743	4	-2.8511	59	0.99497	0.99907	1	18677	0
MRPL18	0.0004357	0.00021366	0.015183	269	3	-2.8475	60	0.82245	0.91791	1	15132	0
RPS20	0.023186	0.026784	0.279615	1831	4	-2.8222	61	0.97681	0.99433	1	18133	0
CDIPT	0.0011047	0.00069641	0.033531	395	4	-2.8092	62	0.98985	0.99805	1	18489	0
YARS	0.00029391	0.00012509	0.010045	232	4	-2.7971	63	0.96829	0.99105	1	17914	0
MRPL41	1.0343e-07	2.5898e-07	0.000183	9	4	-2.7949	64	1	1	1	19107	0
VMP1	0.00083108	0.00045711	0.024503	349	3	-2.7944	65	0.80349	0.90223	1	14791	0
ENO1	9.5831e-07	2.5898e-07	0.000183	23	4	-2.7915	66	1	1	1	19096	0
RPS19	0.0029416	0.0023291	0.072864	611	4	-2.7906	67	0.99706	0.99939	1	18790	0
SUPT4H1	0.0055469	0.0039125	0.087573	850	4	-2.7697	68	0.99445	0.99892	1	18654	0
PRPF19	0.0044642	0.0030889	0.076495	764	4	-2.7685	69	0.95445	0.98632	1	17636	0
POLR2I	0.0013399	0.00076893	0.03358	430	4	-2.7573	70	0.99866	0.99973	1	18891	0
CEBPZ	0.0056149	0.004116	0.091074	854	4	-2.7561	71	0.99439	0.99891	1	18652	0
HSCB	2.4981e-05	5.4387e-06	0.001368	75	4	-2.7536	72	0.99901	0.99979	1	18921	0
POLR2L	0.0016784	0.00099476	0.040201	472	4	-2.748	73	0.98876	0.99783	1	18454	0
HSPE1	0.12544	0.15167	0.580683	4813	3	-2.7456	74	0.90983	0.96557	1	16707	0
CTNNBL1	0.00058384	0.00030016	0.019189	299	3	-2.7357	75	0.86798	0.94232	1	15928	0
C14orf80	1.2054e-06	2.5898e-07	0.000183	25	4	-2.7315	76	1	1	1	19095	0
MVK	0.0002677	0.00011007	0.009607	219	4	-2.72	77	0.99821	0.99964	1	18862	0
ZNHIT2	0.067764	0.071434	0.397751	3404	3	-2.7116	78	0.94689	0.98258	1	17479	0
CRKL	0.0001822	8.8832e-05	0.008937	188	4	-2.7114	79	0.99821	0.99964	1	18861	0
EEF1G	8.0109e-09	2.5898e-07	0.000183	4	4	-2.7091	80	1	1	1	19112	0
TIMM10	0.035172	0.036114	0.292019	2345	4	-2.6987	81	0.96028	0.988	1	17746	0
RPS13	0.0079527	0.0055643	0.104208	1013	4	-2.696	82	0.99205	0.99846	1	18573	0
DHX8	0.014812	0.019807	0.26245	1413	4	-2.691	83	0.98519	0.99657	1	18360	0
TBC1D3F	0.0041664	0.0030516	0.076495	742	4	-2.6882	84	0.99583	0.99914	1	18717	0
BCL2L1	0.0013246	0.00076012	0.03358	426	3	-2.6856	85	0.22596	0.48078	1	6530	1
CLTC	1.9627e-05	4.4027e-06	0.001238	67	4	-2.685	86	0.99998	1	1	19073	0
ATP6V1B2	0.0013277	0.00076012	0.03358	428	4	-2.6838	87	0.99867	0.99973	1	18892	0
PTK6	0.013846	0.018884	0.26245	1360	3	-2.664	88	0.37801	0.61123	1	8835	1
SNRNP25	8.6339e-06	2.3309e-06	0.000874	45	4	-2.6629	89	0.99999	1	1	19084	0
PHAX	0.00084543	0.00045763	0.024503	353	4	-2.6545	90	0.99915	0.99982	1	18935	0
CCDC84	1.5149e-07	2.5898e-07	0.000183	13	4	-2.6525	91	1	1	1	19104	0
RPL11	0.017444	0.022094	0.264604	1564	4	-2.6326	92	0.98256	0.99581	1	18292	0
RPS18	0.019771	0.02357	0.264604	1689	3	-2.6164	93	0.90962	0.96557	1	16700	0
ASNA1	0.00023167	0.00010592	0.009607	206	4	-2.6146	94	0.97229	0.99246	1	18010	0
POLR3B	0.0059653	0.0047102	0.101699	882	4	-2.6131	95	0.94851	0.98355	1	17510	0
PGAM1	2.0376e-11	2.5898e-07	0.000183	1	4	-2.6101	96	1	1	1	19114	0
TRIAP1	0.0012468	0.00074614	0.03358	417	4	-2.6076	97	0.98495	0.99646	1	18352	0
POLR3C	0.020202	0.02363	0.264604	1705	4	-2.6014	98	0.9798	0.99527	1	18207	0
SMC4	0.0027296	0.0021555	0.070192	585	4	-2.5987	99	0.99477	0.99896	1	18670	0
ALG2	0.0012447	0.00073992	0.03358	416	3	-2.5963	100	0.93934	0.97905	1	17340	0
NARS	0.0075943	0.0054783	0.104208	982	4	-2.5949	101	0.98008	0.99534	1	18210	0
UHRF1	0.00045941	0.00023283	0.016125	275	4	-2.5788	102	0.99738	0.99949	1	18804	0
ATP1A1	3.3313e-05	8.0285e-06	0.001827	83	4	-2.5747	103	0.95795	0.9874	1	17707	0
ZFP36L1	0.0099622	0.011075	0.180451	1152	3	-2.5736	104	0.69209	0.80651	1	12722	1
ACACA	0.00023556	0.00010748	0.009607	208	4	-2.5699	105	0.99553	0.99914	1	18708	0
CENPA	0.00024185	0.000108	0.009607	210	4	-2.5665	106	0.99976	0.99996	1	19006	0
EIF3C	0.0027991	0.0023166	0.072864	594	4	-2.5529	107	0.9972	0.9994	1	18797	0
TCEB2	0.0050505	0.0033914	0.079738	808	3	-2.5522	108	0.88287	0.95079	1	16203	0
PTPMT1	3.3125e-05	8.0285e-06	0.001827	82	4	-2.5452	109	0.98866	0.99783	1	18449	0
SKIV2L2	0.012442	0.01625	0.239868	1294	3	-2.5426	110	0.28298	0.55962	1	7761	1
ELP5	3.8542e-10	2.5898e-07	0.000183	3	3	-2.5088	111	0.42277	0.63411	1	9279	1
NBAS	0.074522	0.084571	0.452947	3559	3	-2.5017	112	0.59228	0.7374	1	11286	1
EXOSC10	0.012374	0.016172	0.239075	1291	4	-2.5002	113	0.98468	0.99646	1	18342	0
DHX33	0.00017478	8.8832e-05	0.008937	180	4	-2.4995	114	0.99983	0.99998	1	19015	0
CCT4	0.014685	0.01971	0.26245	1408	3	-2.4944	115	0.91587	0.96896	1	16834	0
TAF6	0.0077383	0.0055058	0.104208	996	4	-2.4942	116	0.99226	0.99852	1	18581	0
HINFP	0.0035326	0.0027118	0.073058	688	4	-2.4911	117	0.99647	0.99925	1	18751	0
SRF	0.0022828	0.0015309	0.053496	547	3	-2.4757	118	0.68995	0.80449	1	12699	1
HSD17B12	0.0040194	0.0029796	0.076495	733	4	-2.4741	119	0.99283	0.99861	1	18607	0
RPL31	0.020873	0.024611	0.270058	1734	3	-2.4664	120	0.79816	0.89796	1	14700	0
RPL7A	0.04408	0.047821	0.332284	2709	3	-2.462	121	0.73396	0.84592	1	13484	0
WDR83	8.3916e-05	5.3092e-05	0.007535	130	4	-2.4563	122	0.99992	0.99998	1	19040	0
CMTR1	0.0001624	8.8832e-05	0.008937	173	4	-2.4541	123	0.99984	0.99998	1	19020	0
DNMT1	0.000307	0.00012664	0.010045	236	4	-2.4528	124	0.96038	0.98815	1	17749	0
TIMELESS	0.037787	0.038187	0.295525	2465	3	-2.4258	125	0.90758	0.96426	1	16663	0
TUT1	0.001413	0.00076944	0.03358	438	4	-2.4246	126	0.99859	0.99972	1	18886	0
TOMM70A	0.0029935	0.0023886	0.073058	616	3	-2.4237	127	0.94498	0.982	1	17447	0
CDK4	0.0085742	0.0061242	0.1085	1069	4	-2.4197	128	0.96691	0.99071	1	17880	0
PAFAH1B1	0.00088493	0.00047368	0.024971	358	4	-2.4184	129	0.97857	0.99482	1	18178	0
UBE2M	0.027318	0.030363	0.284895	2024	3	-2.4181	130	0.38979	0.61964	1	8940	1
CDC20	0.047157	0.05072	0.341351	2826	3	-2.4149	131	0.78549	0.88894	1	14456	0
TKT	1.1311e-10	2.5898e-07	0.000183	2	4	-2.4078	132	1	1	1	19113	0
CSTF3	0.0013552	0.00076893	0.03358	432	4	-2.3989	133	0.96476	0.98974	1	17840	0
HMGCS1	4.4831e-05	3.9625e-05	0.007535	98	4	-2.3903	134	0.99996	0.99999	1	19056	0
RPL19	0.002021	0.0013682	0.04991	518	4	-2.3804	135	0.99798	0.9996	1	18843	0
ATP6V1C1	0.0001869	8.935e-05	0.008942	191	4	-2.3733	136	0.98315	0.9961	1	18306	0
ATP5E	0.00042629	0.00021314	0.015183	267	4	-2.3655	137	0.99949	0.99991	1	18964	0
TUBGCP2	0.037774	0.038187	0.295525	2463	4	-2.3621	138	0.95771	0.98725	1	17703	0
PCBP1	0.00089462	0.0004742	0.024971	363	4	-2.3531	139	0.99911	0.99982	1	18928	0
IARS2	0.0024578	0.0017769	0.060116	561	4	-2.3502	140	0.99754	0.99954	1	18812	0
C1orf109	0.0023779	0.0017764	0.060116	554	3	-2.3419	141	0.92596	0.97319	1	17041	0
CAPZB	0.0011497	0.00071868	0.033531	405	4	-2.3414	142	0.9908	0.99823	1	18522	0
RNASEH2A	1.1541e-08	2.5898e-07	0.000183	6	4	-2.3385	143	1	1	1	19110	0
DNAJC8	0.00036289	0.00016238	0.012069	255	4	-2.338	144	0.98268	0.99581	1	18296	0
XRCC3	0.0025836	0.0018339	0.06107	574	3	-2.3321	145	0.53387	0.69879	1	10492	1
SMC3	0.0029475	0.0023638	0.073058	612	4	-2.315	146	0.99705	0.99939	1	18789	0
EIF3D	0.016715	0.02111	0.26245	1525	4	-2.2997	147	0.97896	0.99489	1	18191	0
PSMA3	0.01825	0.022646	0.264604	1609	3	-2.294	148	0.89348	0.95604	1	16389	0
SNRNP40	0.00018412	8.8832e-05	0.008937	190	4	-2.2869	149	0.98241	0.99575	1	18290	0
TRAPPC4	0.010204	0.011076	0.180451	1163	4	-2.2821	150	0.98843	0.99775	1	18442	0
UROD	3.3918e-07	2.5898e-07	0.000183	15	4	-2.2817	151	1	1	1	19102	0
BARD1	0.0022012	0.0014594	0.051838	538	3	-2.2691	152	0.76238	0.86731	1	14010	0
OGT	2.5788e-05	5.9567e-06	0.001423	77	4	-2.2687	153	0.99997	1	1	19068	0
MRPL43	0.0049748	0.0033909	0.079738	799	4	-2.2482	154	0.99076	0.99823	1	18517	0
PGK1	5.104e-07	2.5898e-07	0.000183	18	4	-2.2435	155	1	1	1	19100	0
LUC7L3	1.9279e-05	4.4027e-06	0.001238	63	4	-2.2432	156	0.99998	1	1	19076	0
PPP4C	0.00058134	0.00029965	0.019189	298	4	-2.2426	157	0.99089	0.99824	1	18528	0
IARS	0.028334	0.031406	0.286696	2074	4	-2.2373	158	0.9688	0.99105	1	17928	0
DCPS	0.00093213	0.00055915	0.028604	373	4	-2.2364	159	0.99754	0.99954	1	18810	0
CDS2	0.0018348	0.0010585	0.04106	491	4	-2.2278	160	0.95272	0.98582	1	17600	0
DOLK	2.7171e-06	7.7695e-07	0.000424	34	4	-2.2219	161	1	1	1	19091	0
SPTSSA	0.00073293	0.00042499	0.02428	334	4	-2.2055	162	0.99927	0.99984	1	18943	0
RPL36	0.099022	0.1176	0.525599	4163	3	-2.1998	163	0.94694	0.9828	1	17481	0
EIF5A	0.0020118	0.0013682	0.04991	516	4	-2.1986	164	0.96816	0.99105	1	17909	0
TINF2	0.040492	0.044883	0.33008	2568	3	-2.1983	165	0.33569	0.59894	1	8441	1
PFDN2	2.5781e-06	7.7695e-07	0.000424	33	4	-2.1969	166	1	1	1	19092	0
EFTUD2	0.055226	0.0612	0.367648	3112	3	-2.1949	167	0.91741	0.96925	1	16872	0
SHFM1	0.0031774	0.0026559	0.073058	639	4	-2.1836	168	0.99682	0.99931	1	18776	0
POLR1C	0.0098023	0.010952	0.180451	1141	3	-2.1819	169	0.92816	0.97399	1	17098	0
RPF2	0.031633	0.033466	0.287251	2221	3	-2.1706	170	0.69359	0.80651	1	12749	1
PDCD2	0.013469	0.018237	0.259768	1340	4	-2.1595	171	0.98653	0.99696	1	18404	0
TUBB	0.031573	0.033466	0.287251	2215	4	-2.1592	172	0.96559	0.98999	1	17860	0
ZCRB1	0.00012291	7.4329e-05	0.008937	151	4	-2.1589	173	0.99621	0.99921	1	18736	0
SAMM50	0.0046041	0.003121	0.07678	777	4	-2.1542	174	0.9954	0.99914	1	18699	0
MCAT	3.6982e-07	2.5898e-07	0.000183	16	4	-2.1494	175	0.99999	1	1	19087	0
SNRPD2	0.0051401	0.0034173	0.080051	815	4	-2.1454	176	0.99486	0.99905	1	18674	0
ORAOV1	0.003293	0.0026564	0.073058	654	4	-2.1399	177	0.99671	0.99931	1	18770	0
MEPCE	0.076764	0.089626	0.472608	3611	3	-2.1361	178	0.93395	0.97707	1	17229	0
MED14	0.022616	0.026397	0.277705	1809	4	-2.1299	179	0.96544	0.98999	1	17857	0
TICRR	0.025953	0.029842	0.284674	1967	4	-2.1251	180	0.97405	0.99296	1	18055	0
TAF1A	0.0010697	0.00066689	0.032519	392	4	-2.1248	181	0.99893	0.99979	1	18910	0
GPR89A	2.3252e-05	4.9207e-06	0.001271	73	4	-2.1223	182	0.99881	0.99978	1	18901	0
PMVK	0.0054329	0.003912	0.087573	836	3	-2.1219	183	0.28274	0.55962	1	7754	1
NPIPA5	0.014507	0.019603	0.26245	1401	4	-2.1206	184	0.94796	0.98337	1	17497	0
METTL16	0.00012319	7.4329e-05	0.008937	152	4	-2.1096	185	0.99988	0.99998	1	19029	0
TANGO6	0.0042411	0.0030516	0.076495	749	3	-2.1063	186	0.77427	0.87683	1	14239	0
TRIM73	0.02571	0.029841	0.284674	1957	3	-2.1055	187	0.43337	0.64148	1	9380	1
ECT2	0.00039142	0.0001888	0.013722	262	4	-2.1051	188	0.995	0.99907	1	18679	0
CLNS1A	0.0020248	0.0013729	0.04991	519	3	-2.0967	189	0.91022	0.96557	1	16717	0
BOP1	0.00073017	0.00042499	0.02428	332	3	-2.0941	190	0.90315	0.9619	1	16572	0
RPS9	0.12928	0.15293	0.580683	4908	3	-2.093	191	0.90146	0.9612	1	16533	0
SOD1	0.0012133	0.00072852	0.03358	412	4	-2.0905	192	0.99879	0.99977	1	18899	0
ATP5C1	0.00029007	0.00012457	0.010045	230	3	-2.0884	193	0.81766	0.91352	1	15053	0
TRAPPC1	0.0032875	0.0026564	0.073058	653	3	-2.0853	194	0.76463	0.86906	1	14053	0
METTL3	8.5325e-05	5.361e-05	0.007535	132	4	-2.0834	195	0.99989	0.99998	1	19034	0
C19orf53	0.074226	0.08457	0.452947	3550	3	-2.0818	196	0.73643	0.84787	1	13522	0
LRRC37A3	0.051277	0.055881	0.356768	2993	3	-2.0817	197	0.39367	0.62176	1	8980	1
PPP6C	0.00010292	5.7236e-05	0.007705	141	4	-2.0811	198	0.9999	0.99998	1	19037	0
PELO	6.2168e-05	4.7394e-05	0.007535	112	3	-2.0775	199	0.90321	0.9619	1	16574	0
PHF5A	0.062398	0.067256	0.38935	3279	3	-2.072	200	0.32043	0.59061	1	8312	1
ELP2	4.9144e-06	1.2949e-06	0.000635	38	3	-2.0708	201	0.7407	0.85071	1	13605	0
USP7	0.0008682	0.00045763	0.024503	356	4	-2.0672	202	0.99913	0.99982	1	18932	0
ATP6V0C	2.1673e-06	7.7695e-07	0.000424	29	4	-2.0663	203	0.99201	0.99846	1	18571	0
ATP5J	0.001565	0.00091085	0.037932	457	3	-2.0642	204	0.94126	0.98035	1	17374	0
TOMM20	1.6058e-05	2.8488e-06	0.000955	57	4	-2.0604	205	0.99994	0.99999	1	19049	0
PRMT5	5.0562e-06	1.2949e-06	0.000635	39	4	-2.0539	206	0.99999	1	1	19088	0
MPHOSPH10	0.01024	0.011076	0.180451	1166	4	-2.0529	207	0.98976	0.99805	1	18485	0
DYNLL1	0.025265	0.029388	0.284674	1933	3	-2.0485	208	0.76525	0.86906	1	14062	0
DNAJC2	0.00032913	0.00015151	0.011584	249	4	-2.0478	209	0.97793	0.99458	1	18158	0
POLR3A	0.017691	0.022534	0.264604	1574	4	-2.0474	210	0.98231	0.99569	1	18287	0
NCAPG2	0.027395	0.030364	0.284895	2034	3	-2.0463	211	0.88072	0.9495	1	16169	0
AIFM1	1.934e-05	4.4027e-06	0.001238	64	4	-2.0458	212	0.99998	1	1	19075	0
CIAO1	3.8908e-05	1.9424e-05	0.004036	91	4	-2.0438	213	0.99603	0.99921	1	18725	0
RPLP2	0.019613	0.023509	0.264604	1683	4	-2.0356	214	0.98039	0.99541	1	18223	0
DDX49	0.0040345	0.003018	0.076495	735	4	-2.0354	215	0.99597	0.99917	1	18724	0
NR2C2AP	0.0016035	0.00098751	0.040098	463	4	-2.0339	216	0.94882	0.98375	1	17519	0
TRAPPC11	8.4503e-06	2.3309e-06	0.000874	43	4	-2.0332	217	0.99999	1	1	19085	0
NAA35	0.011489	0.015509	0.238072	1241	3	-2.0328	218	0.9455	0.98218	1	17453	0
N6AMT1	4.0209e-05	1.9942e-05	0.004099	93	4	-2.0277	219	0.99996	0.99999	1	19059	0
HSPA5	0.0049126	0.0033909	0.079738	795	4	-2.0265	220	0.99486	0.99905	1	18673	0
DDX20	1.6245e-05	3.3668e-06	0.001091	58	4	-2.0257	221	0.99998	1	1	19079	0
PA2G4	3.735e-05	1.6316e-05	0.003585	87	2	-2.0245	222	0.86031	0.93939	1	15794	0
TP53RK	0.033786	0.03527	0.292019	2294	3	-2.0232	223	0.68957	0.80449	1	12690	1
PRPF38A	0.069533	0.074747	0.415224	3440	3	-2.0229	224	0.2076	0.45954	1	6123	1
NAA10	0.0019733	0.0013604	0.04991	508	3	-2.0087	225	0.81252	0.90963	1	14955	0
WASH1	0.0092159	0.0063646	0.1098	1107	4	-2.0074	226	0.99078	0.99823	1	18520	0
ECD	0.008866	0.0061859	0.1085	1082	4	-2.0016	227	0.99113	0.99836	1	18539	0
PPM1G	0.010466	0.011185	0.181184	1180	4	-2.0002	228	0.98443	0.99646	1	18335	0
HIST1H2AI	0.035505	0.036328	0.292019	2361	3	-1.998	229	0.9284	0.97399	1	17104	0
RNASEH2C	1.8502e-05	4.4027e-06	0.001238	61	4	-1.9962	230	0.99996	0.99999	1	19064	0
RPS28	0.00053248	0.00025976	0.017181	288	4	-1.9926	231	0.99947	0.99991	1	18962	0
RAD51D	0.0025091	0.0018064	0.060685	568	4	-1.9904	232	0.9926	0.99858	1	18595	0
SNUPN	4.0448e-05	2.2014e-05	0.004429	94	4	-1.9884	233	0.99767	0.99954	1	18820	0
XRCC6	3.5832e-05	1.5798e-05	0.003511	85	4	-1.9857	234	0.99617	0.99921	1	18732	0
C10orf2	4.0413e-06	1.2949e-06	0.000635	36	4	-1.9842	235	1	1	1	19090	0
RSU1	0.029089	0.031722	0.286696	2105	4	-1.9816	236	0.97091	0.99194	1	17977	0
NUBP1	0.0016284	0.00098803	0.040098	467	4	-1.9815	237	0.99837	0.99966	1	18873	0
NDUFA11	0.013172	0.018009	0.258642	1323	4	-1.9782	238	0.97077	0.99194	1	17973	0
TRMT61A	0.0034383	0.0027118	0.073058	674	3	-1.9765	239	0.77147	0.87428	1	14186	0
C1orf27	0.0026187	0.0018888	0.062051	577	4	-1.9715	240	0.99738	0.99949	1	18803	0
SKP2	0.0024631	0.0017769	0.060116	564	4	-1.9698	241	0.98918	0.99788	1	18464	0
DDX46	0.0049134	0.0033909	0.079738	796	4	-1.9684	242	0.99509	0.99907	1	18686	0
COPS6	0.00027488	0.00012354	0.010045	222	4	-1.9671	243	0.99973	0.99996	1	18999	0
THAP7	2.7565e-05	5.9567e-06	0.001423	80	4	-1.9666	244	0.9981	0.99961	1	18852	0
CTDNEP1	1.4375e-05	2.8488e-06	0.000955	55	4	-1.9638	245	0.99999	1	1	19080	0
FARS2	3.6631e-05	1.5798e-05	0.003511	86	4	-1.9563	246	0.99996	0.99999	1	19065	0
NCL	0.0027342	0.0021555	0.070192	586	4	-1.9562	247	0.97384	0.99285	1	18047	0
SFT2D3	0.0053297	0.0037146	0.085342	829	3	-1.9515	248	0.03316	0.1428	1	1632	1
USP17L18	0.00083803	0.00045711	0.024503	350	4	-1.9497	249	0.99916	0.99982	1	18937	0
CTU2	0.00088849	0.0004742	0.024971	360	4	-1.9494	250	0.99911	0.99982	1	18930	0
NOP16	0.00020052	9.5565e-05	0.009096	196	4	-1.9489	251	0.9998	0.99997	1	19012	0
BUB3	0.011803	0.015689	0.238072	1258	4	-1.9484	252	0.9882	0.99763	1	18432	0
U2AF1	0.017431	0.022094	0.264604	1563	3	-1.9481	253	0.74254	0.85357	1	13643	0
NOP56	0.016726	0.02111	0.26245	1527	3	-1.9455	254	0.94506	0.982	1	17449	0
UFSP2	2.1982e-06	7.7695e-07	0.000424	30	4	-1.9448	255	0.99182	0.99839	1	18566	0
RPS24	0.080036	0.094038	0.48402	3689	3	-1.9427	256	0.6514	0.7762	1	12074	1
WDR73	5.9735e-07	2.5898e-07	0.000183	19	4	-1.939	257	1	1	1	19099	0
EIF2S3	0.021343	0.025384	0.275544	1756	3	-1.9386	258	0.2584	0.53032	1	7220	1
CNOT3	0.015525	0.020288	0.26245	1459	3	-1.9372	259	0.61198	0.74899	1	11550	1
TRMT112	0.021328	0.025384	0.275544	1755	4	-1.9361	260	0.97867	0.99482	1	18182	0
ARPC4	4.9424e-05	4.4804e-05	0.007535	103	4	-1.9335	261	0.9976	0.99954	1	18815	0
NOL7	0.093688	0.11086	0.52092	4037	3	-1.9326	262	0.64917	0.77312	1	12040	1
MARS2	1.271e-05	2.8488e-06	0.000955	52	4	-1.9308	263	0.99794	0.99959	1	18840	0
DDX21	0.11997	0.14257	0.580683	4677	3	-1.9306	264	0.87051	0.94232	1	15981	0
CABIN1	0.017388	0.021779	0.264604	1561	4	-1.9301	265	0.96437	0.98949	1	17834	0
EIF5	0.0018608	0.0010704	0.041334	495	4	-1.9257	266	0.99814	0.99962	1	18856	0
DDX59	0.00023777	0.000108	0.009607	209	4	-1.919	267	0.99976	0.99996	1	19007	0
ZNHIT3	0.0045772	0.0031205	0.07678	775	4	-1.9184	268	0.99542	0.99914	1	18701	0
WRAP53	0.0083863	0.0057679	0.104208	1053	4	-1.9176	269	0.95545	0.98679	1	17651	0
LSM7	0.0050189	0.0033914	0.079738	804	4	-1.9173	270	0.98611	0.99674	1	18392	0
AK6	0.0032166	0.0026559	0.073058	645	4	-1.9168	271	0.99678	0.99931	1	18772	0
UTP23	2.0244e-05	4.4027e-06	0.001238	68	4	-1.9103	272	0.99998	1	1	19072	0
MINOS1	1.4995e-05	2.8488e-06	0.000955	56	4	-1.906	273	0.98033	0.99541	1	18220	0
PSMB5	0.00084464	0.00045763	0.024503	351	4	-1.9008	274	0.99913	0.99982	1	18933	0
NCAPH2	0.0047641	0.0033681	0.079738	786	3	-1.9005	275	0.91309	0.96777	1	16783	0
HEATR1	0.0014212	0.00079016	0.034249	441	4	-1.9004	276	0.96773	0.99105	1	17900	0
TMED2	0.00040803	0.00019605	0.014142	264	4	-1.8962	277	0.99893	0.99979	1	18911	0
TBCE	0.0012311	0.0007394	0.03358	414	4	-1.8945	278	0.99779	0.99957	1	18828	0
TPI1	1.5308e-07	2.5898e-07	0.000183	14	4	-1.8943	279	1	1	1	19103	0
HSPD1	0.0070333	0.0053307	0.104208	951	4	-1.8934	280	0.95856	0.98754	1	17720	0
MIS18A	0.0084138	0.0057679	0.104208	1055	3	-1.892	281	0.49435	0.67164	1	10030	1
LIG1	0.045725	0.048872	0.336158	2775	3	-1.8891	282	0.88153	0.94995	1	16184	0
NSA2	0.0097035	0.0070913	0.119427	1135	4	-1.8877	283	0.97396	0.99296	1	18051	0
PGS1	0.0020672	0.0013729	0.04991	524	4	-1.8842	284	0.99793	0.99959	1	18838	0
NUDC	0.05576	0.0612	0.367648	3129	3	-1.8838	285	0.94258	0.98077	1	17404	0
DNAJC11	0.00010087	5.7236e-05	0.007705	139	4	-1.8828	286	0.99846	0.99969	1	18880	0
NAA25	0.00017682	8.8832e-05	0.008937	183	3	-1.8828	287	0.54693	0.71015	1	10687	1
MRPS34	0.0004657	0.00023283	0.016125	276	4	-1.8826	288	0.99953	0.99992	1	18967	0
EIF3B	0.033104	0.034703	0.291076	2271	3	-1.8814	289	0.33815	0.59997	1	8472	1
THAP1	0.00021776	9.6601e-05	0.009096	203	4	-1.8787	290	0.99978	0.99997	1	19008	0
RARS	0.0071486	0.0053312	0.104208	959	3	-1.8753	291	0.42103	0.63307	1	9261	1
CDK7	0.00050775	0.00025614	0.017181	283	4	-1.8748	292	0.99949	0.99992	1	18965	0
ISY1	0.0043249	0.0030521	0.076495	757	4	-1.8728	293	0.99568	0.99914	1	18712	0
ATP6V1E1	0.0028575	0.0023285	0.072864	599	3	-1.8697	294	0.92325	0.97155	1	16980	0
RMI1	2.668e-05	5.9567e-06	0.001423	79	3	-1.8684	295	0.92963	0.97477	1	17129	0
DPH3	0.0001417	8.8314e-05	0.008937	162	4	-1.8673	296	0.98978	0.99805	1	18487	0
UXT	0.00011034	6.3969e-05	0.008433	144	3	-1.8671	297	0.32882	0.59684	1	8375	1
PRPF38B	0.020514	0.02392	0.266142	1716	2	-1.863	298	0.5112	0.68621	1	10218	1
EEF1A1	0.16899	0.18798	0.607152	5874	3	-1.8569	299	0.24141	0.50219	1	6863	1
CHORDC1	0.015006	0.019907	0.26245	1428	3	-1.8556	300	0.94312	0.98097	1	17416	0
YRDC	0.013748	0.018751	0.26245	1355	4	-1.8511	301	0.95209	0.98535	1	17592	0
NOP14	0.012252	0.016172	0.239075	1285	4	-1.8505	302	0.98775	0.99744	1	18421	0
SNAP23	0.0079908	0.0055643	0.104208	1018	3	-1.8497	303	0.087076	0.26706	1	3422	1
TAF1C	0.0011226	0.00071868	0.033531	398	4	-1.8455	304	0.99888	0.99978	1	18907	0
TRIT1	0.00032571	0.00015099	0.011584	248	4	-1.8403	305	0.99967	0.99995	1	18983	0
GCN1L1	0.0026017	0.0018717	0.062051	575	3	-1.839	306	0.69102	0.80549	1	12713	1
KLF6	0.0003511	0.00015928	0.012069	252	4	-1.8385	307	0.99965	0.99995	1	18978	0
DAXX	0.00015603	8.8314e-05	0.008937	168	4	-1.836	308	0.99984	0.99998	1	19023	0
NUS1	0.017629	0.022533	0.264604	1570	4	-1.8338	309	0.98237	0.99569	1	18289	0
PPP2R4	0.00012361	7.4329e-05	0.008937	153	4	-1.8296	310	0.99826	0.99964	1	18868	0
MTX2	1.0433e-05	2.3309e-06	0.000874	50	3	-1.8285	311	0.87061	0.94232	1	15984	0
HUS1	0.00013447	8.7278e-05	0.008937	157	3	-1.8282	312	0.87398	0.94414	1	16041	0
GATAD1	0.0001241	7.4329e-05	0.008937	154	4	-1.8269	313	0.9993	0.99985	1	18945	0
TELO2	4.1542e-06	1.2949e-06	0.000635	37	4	-1.8221	314	1	1	1	19089	0
PDCD7	0.007353	0.0053612	0.104208	970	3	-1.8216	315	0.93377	0.97707	1	17223	0
PHB	0.0043058	0.0030521	0.076495	755	4	-1.8199	316	0.99569	0.99914	1	18713	0
LOC100144595	0.0038781	0.0029164	0.076495	725	4	-1.8167	317	0.99612	0.99921	1	18727	0
FAU	0.0036499	0.0027123	0.073058	708	3	-1.8164	318	0.93697	0.97772	1	17291	0
ATP6V1A	0.00054952	0.00027944	0.018231	293	4	-1.8151	319	0.99945	0.9999	1	18958	0
RPL23	0.022437	0.026163	0.276912	1805	4	-1.8123	320	0.97756	0.99451	1	18152	0
VPS52	8.9316e-05	5.361e-05	0.007535	134	4	-1.8113	321	0.97317	0.99276	1	18029	0
RPS10	0.030879	0.033214	0.287251	2182	4	-1.809	322	0.96912	0.99117	1	17935	0
NUP155	0.00050034	0.00025614	0.017181	282	4	-1.8086	323	0.99065	0.99816	1	18513	0
GPR89B	1.9545e-05	4.4027e-06	0.001238	66	4	-1.8085	324	0.99967	0.99995	1	18981	0
ABCB7	0.0024187	0.0017764	0.060116	558	4	-1.8062	325	0.99758	0.99954	1	18814	0
METAP2	0.00048778	0.00025562	0.017181	278	4	-1.8036	326	0.99951	0.99992	1	18966	0
PMF1	0.011023	0.015419	0.238072	1220	3	-1.8031	327	0.81745	0.91352	1	15051	0
LIN52	0.016372	0.021002	0.26245	1508	3	-1.801	328	0.91641	0.96925	1	16850	0
BCAR1	0.010408	0.011147	0.180733	1179	4	-1.7997	329	0.98959	0.99797	1	18478	0
HNRNPM	4.5133e-05	3.9625e-05	0.007535	99	4	-1.7987	330	0.96481	0.98974	1	17844	0
HLCS	0.00023476	0.00010696	0.009607	207	4	-1.7987	331	0.99807	0.99961	1	18849	0
MRPS35	6.2618e-05	4.7394e-05	0.007535	113	4	-1.7964	332	0.99994	0.99999	1	19050	0
MRPL44	0.00092477	0.00054413	0.028111	370	4	-1.7962	333	0.99883	0.99978	1	18904	0
C16orf59	0.003384	0.0026864	0.073058	669	4	-1.7962	334	0.98579	0.99663	1	18383	0
NOL6	0.0018596	0.0010704	0.041334	494	3	-1.7946	335	0.82218	0.91791	1	15126	0
CCNA2	0.012725	0.017046	0.249492	1305	4	-1.794	336	0.97472	0.99334	1	18067	0
UBE2G2	1.787e-05	3.8848e-06	0.001238	60	4	-1.7911	337	0.99996	0.99999	1	19062	0
FDPS	0.088426	0.10382	0.506767	3906	2	-1.7907	338	0.67714	0.79721	1	12480	1
RPS6KA6	0.0019282	0.0011657	0.043949	503	3	-1.7906	339	0.91216	0.96747	1	16764	0
HNRNPK	0.00074195	0.00042551	0.02428	335	4	-1.7883	340	0.99926	0.99984	1	18941	0
RAPGEF1	1.4248e-06	2.5898e-07	0.000183	27	4	-1.7877	341	1	1	1	19094	0
NVL	0.060428	0.063239	0.372058	3232	3	-1.7869	342	0.27189	0.54633	1	7525	1
RPS14	0.052035	0.056551	0.357344	3024	4	-1.7861	343	0.94796	0.98337	1	17498	0
DHX9	0.00044311	0.00022972	0.016062	270	4	-1.7854	344	0.99956	0.99992	1	18972	0
RPS27A	0.0077066	0.0055058	0.104208	994	4	-1.7836	345	0.99229	0.99852	1	18583	0
FTSJ2	0.001635	0.00098803	0.040098	471	4	-1.7802	346	0.9864	0.99696	1	18402	0
RPL13A	0.019531	0.023508	0.264604	1673	4	-1.7799	347	0.98047	0.99541	1	18228	0
RNMT	0.026165	0.029928	0.284674	1977	3	-1.7791	348	0.7709	0.87343	1	14176	0
ILF3	0.0035123	0.0027118	0.073058	685	4	-1.7767	349	0.95105	0.985	1	17573	0
UTP3	0.026552	0.030008	0.284674	1996	4	-1.7766	350	0.95622	0.98695	1	17663	0
DDX31	0.00014455	8.8314e-05	0.008937	164	4	-1.7729	351	0.99974	0.99996	1	19003	0
ATP6V0B	0.0024669	0.0017769	0.060116	565	4	-1.7719	352	0.97573	0.99371	1	18101	0
SYNCRIP	0.00053076	0.00025976	0.017181	287	3	-1.7708	353	0.93622	0.97772	1	17273	0
IMP3	0.019985	0.023629	0.264604	1698	3	-1.7702	354	0.20929	0.45954	1	6167	1
HSPA14	9.7621e-05	5.6718e-05	0.007705	138	3	-1.7692	355	0.52308	0.6914	1	10363	1
ACTR1A	0.0033121	0.0026564	0.073058	659	4	-1.7692	356	0.98262	0.99581	1	18293	0
SERTAD1	0.006845	0.0051458	0.104208	942	4	-1.7649	357	0.99316	0.99869	1	18614	0
RPL10A	0.077681	0.090829	0.475024	3633	3	-1.7643	358	0.8865	0.95205	1	16263	0
GPI	0.003312	0.0026564	0.073058	658	2	-1.7638	359	0.77705	0.87937	1	14296	0
TIPRL	0.00069436	0.00041981	0.024274	324	4	-1.7625	360	0.99931	0.99985	1	18946	0
GADD45GIP1	0.00081212	0.00045711	0.024503	343	4	-1.761	361	0.99919	0.99982	1	18940	0
MAK16	0.0031017	0.002602	0.073058	630	4	-1.7609	362	0.9969	0.99936	1	18782	0
MRPL38	0.00060103	0.00032762	0.020136	308	4	-1.7596	363	0.9994	0.99989	1	18954	0
DPF1	0.070354	0.076081	0.419467	3462	3	-1.759	364	0.67603	0.79721	1	12465	1
ALG1L2	0.019433	0.023445	0.264604	1667	3	-1.7575	365	0.73179	0.84496	1	13446	0
RECQL4	8.3922e-05	5.3092e-05	0.007535	131	3	-1.756	366	0.74675	0.85823	1	13720	0
SNRPF	0.021999	0.025996	0.276679	1786	4	-1.7539	367	0.978	0.99458	1	18161	0
RNF8	0.0013526	0.00076893	0.03358	431	4	-1.7532	368	0.99865	0.99973	1	18889	0
ADAT2	1.8878e-05	4.4027e-06	0.001238	62	3	-1.7526	369	0.58069	0.73313	1	11136	1
RAD51B	0.00017653	8.8832e-05	0.008937	182	3	-1.7525	370	0.13813	0.35079	1	4549	1
CENPI	0.020534	0.02392	0.266142	1717	3	-1.752	371	0.14756	0.36655	1	4749	1
TRAIP	0.0053501	0.0037146	0.085342	831	3	-1.7501	372	0.77153	0.87428	1	14188	0
GEMIN4	0.0015372	0.00091033	0.037932	453	4	-1.7479	373	0.98405	0.99635	1	18324	0
RPL35A	0.0011813	0.0007192	0.033531	409	4	-1.7475	374	0.99274	0.99858	1	18601	0
GPKOW	0.0080551	0.0056492	0.104208	1026	4	-1.7452	375	0.96674	0.9906	1	17876	0
SKP1	0.0010413	0.00063788	0.031696	383	4	-1.7444	376	0.99896	0.99979	1	18917	0
MTCH2	0.00019369	9.4011e-05	0.009096	193	3	-1.7435	377	0.63087	0.76586	1	11788	1
RPL18A	0.015838	0.020679	0.26245	1476	4	-1.7429	378	0.98416	0.9964	1	18327	0
UTP6	0.0043748	0.0030521	0.076495	760	4	-1.7402	379	0.99563	0.99914	1	18709	0
CPSF4	0.005159	0.0034437	0.080571	817	4	-1.7397	380	0.99134	0.99836	1	18548	0
RPL4	0.0045914	0.0031205	0.07678	776	4	-1.7393	381	0.99541	0.99914	1	18700	0
PWP2	0.00090428	0.00054361	0.028111	364	4	-1.7389	382	0.9991	0.99982	1	18927	0
NHP2	0.00031058	0.00012664	0.010045	239	4	-1.7378	383	0.99969	0.99996	1	18988	0
PELP1	0.0022524	0.0015169	0.053123	544	4	-1.7367	384	0.99415	0.99889	1	18646	0
STRAP	0.003489	0.0027118	0.073058	684	4	-1.7351	385	0.99651	0.99925	1	18752	0
RPRD1B	0.00071922	0.00042033	0.024274	331	4	-1.735	386	0.99928	0.99985	1	18944	0
PARN	0.00060391	0.00032762	0.020136	310	4	-1.7349	387	0.9994	0.99989	1	18952	0
POLE2	0.0052422	0.0036949	0.085342	823	3	-1.7289	388	0.6604	0.78248	1	12217	1
TRIM8	0.004128	0.0030516	0.076495	740	4	-1.7286	389	0.99587	0.99914	1	18718	0
ASH2L	0.0015309	0.00091033	0.037932	452	4	-1.7266	390	0.9633	0.98897	1	17809	0
NPIPB6	0.1049	0.11954	0.525599	4321	3	-1.7252	391	0.69577	0.80755	1	12788	1
C19orf52	0.021676	0.025859	0.276679	1771	4	-1.7203	392	0.97832	0.99474	1	18171	0
XRN2	0.027135	0.030128	0.284895	2017	3	-1.7197	393	0.15687	0.38262	1	4951	1
RTEL1	0.012659	0.016711	0.24515	1302	3	-1.7189	394	0.94583	0.98238	1	17458	0
RCC1	0.00019067	9.2976e-05	0.009096	192	3	-1.7179	395	0.8998	0.96018	1	16506	0
CINP	0.00021676	9.6601e-05	0.009096	201	4	-1.7172	396	0.97982	0.99527	1	18208	0
ATP5A1	0.0076517	0.0055052	0.104208	987	4	-1.7127	397	0.99235	0.99852	1	18585	0
ERCC2	0.013707	0.01838	0.260246	1350	3	-1.7107	398	0.64443	0.77	1	11972	1
EIF4A3	0.034563	0.035757	0.292019	2321	3	-1.7093	399	0.018342	0.088898	1	1000	1
LOC158434	0.005577	0.0039125	0.087573	852	3	-1.7059	400	0.71634	0.82856	1	13175	1
MSTO1	0.0058937	0.0046304	0.10105	873	2	-1.7056	401	0.73257	0.84592	1	13459	0
NPLOC4	0.0054276	0.003912	0.087573	835	4	-1.7049	402	0.99457	0.99892	1	18660	0
JMJD6	0.021186	0.025322	0.275544	1748	3	-1.7046	403	0.45108	0.65712	1	9550	1
2022-09-07	2.1985e-05	4.9207e-06	0.001271	71	4	-1.7041	404	0.99926	0.99984	1	18942	0
CHMP6	0.0088597	0.0061859	0.1085	1080	3	-1.7024	405	0.91669	0.96925	1	16860	0
ZPR1	0.0071241	0.0053307	0.104208	958	4	-1.7003	406	0.98089	0.99548	1	18243	0
CCDC101	0.00025253	0.00010851	0.009607	212	3	-1.7002	407	0.86999	0.94232	1	15966	0
COG5	0.0065374	0.0050168	0.103671	924	3	-1.7001	408	0.073784	0.24502	1	3095	1
MFN2	0.00030481	0.00012664	0.010045	234	4	-1.6986	409	0.99858	0.99972	1	18885	0
VPS13D	0.0022377	0.0015024	0.052887	542	4	-1.6978	410	0.98531	0.99657	1	18366	0
LCMT1	0.00056892	0.00028877	0.018648	295	3	-1.6977	411	0.94615	0.98238	1	17463	0
CCND1	0.0057464	0.0041166	0.091074	863	4	-1.697	412	0.99425	0.99891	1	18647	0
MMP3	0.016497	0.021047	0.26245	1517	3	-1.6949	413	0.28519	0.56186	1	7810	1
CHTF18	0.0064847	0.0049308	0.10256	917	4	-1.6911	414	0.99352	0.99875	1	18626	0
NDNL2	0.0064694	0.0049308	0.10256	914	4	-1.6903	415	0.99353	0.99875	1	18628	0
TECR	0.0034311	0.002703	0.073058	672	3	-1.6883	416	0.93135	0.97581	1	17167	0
GINS2	0.0036168	0.0027123	0.073058	703	4	-1.687	417	0.95154	0.985	1	17582	0
TIMMDC1	0.0032071	0.0026559	0.073058	643	4	-1.6868	418	0.98972	0.99805	1	18483	0
CARM1	0.00036792	0.0001629	0.012069	256	4	-1.6837	419	0.98247	0.99581	1	18291	0
COG3	0.00033701	0.00015876	0.012069	251	4	-1.6829	420	0.99966	0.99995	1	18980	0
VPS29	0.011368	0.015509	0.238072	1233	4	-1.682	421	0.97246	0.99246	1	18013	0
RPL12	0.045455	0.048689	0.336158	2765	4	-1.6793	422	0.95455	0.98632	1	17637	0
UBE2L3	0.0084691	0.0060113	0.1083	1061	4	-1.6792	423	0.98119	0.99548	1	18256	0
RPLP0	0.0026424	0.0018893	0.062051	580	4	-1.679	424	0.99736	0.99949	1	18801	0
NOC4L	0.00030482	0.00012664	0.010045	235	4	-1.6742	425	0.9997	0.99996	1	18990	0
DR1	0.0017702	0.0010336	0.04059	482	4	-1.6724	426	0.97083	0.99194	1	17976	0
PPA2	0.0032279	0.0026559	0.073058	647	4	-1.6676	427	0.99521	0.9991	1	18692	0
DLG5	0.0030504	0.0024249	0.073058	620	4	-1.6646	428	0.97341	0.99276	1	18035	0
ZCCHC8	0.00022247	0.0001023	0.009539	205	4	-1.6621	429	0.99883	0.99978	1	18903	0
GNB1L	0.045362	0.048689	0.336158	2761	2	-1.6592	430	0.9225	0.97155	1	16976	0
XPO5	8.598e-07	2.5898e-07	0.000183	20	4	-1.6583	431	0.99507	0.99907	1	18685	0
MARS	0.030944	0.033214	0.287251	2185	3	-1.6565	432	0.86264	0.93939	1	15840	0
PHB2	0.088309	0.10382	0.506767	3899	3	-1.6556	433	0.89657	0.95943	1	16441	0
SOS1	0.00029867	0.00012613	0.010045	233	4	-1.6543	434	0.9997	0.99996	1	18991	0
OXSM	4.2471e-08	2.5898e-07	0.000183	8	4	-1.6542	435	1	1	1	19108	0
TMED10	6.4093e-05	4.7912e-05	0.007535	116	4	-1.6533	436	0.99662	0.99929	1	18762	0
MEMO1	0.0021311	0.0014003	0.050696	528	4	-1.6528	437	0.99787	0.99959	1	18835	0
TOMM40	0.0017255	0.0010264	0.04059	477	3	-1.6497	438	0.91847	0.96984	1	16895	0
DKC1	0.0054464	0.003912	0.087573	838	3	-1.6488	439	0.83342	0.92445	1	15330	0
MASTL	0.027715	0.030527	0.284895	2044	3	-1.6487	440	0.62111	0.75427	1	11675	1
UBE2S	0.022664	0.026397	0.277705	1813	4	-1.6474	441	0.97734	0.99451	1	18148	0
NUDCD3	0.0013893	0.00076944	0.03358	436	4	-1.6464	442	0.97623	0.99399	1	18109	0
MED12	0.00015785	8.8314e-05	0.008937	169	4	-1.6444	443	0.98218	0.99562	1	18284	0
FERMT2	0.0030434	0.0024249	0.073058	618	4	-1.6444	444	0.99696	0.99936	1	18787	0
VWA5A	0.010679	0.014842	0.23662	1199	3	-1.6413	445	0.65034	0.77518	1	12058	1
DOHH	9.4556e-09	2.5898e-07	0.000183	5	4	-1.6402	446	1	1	1	19111	0
HSPA8	0.0011075	0.00069641	0.033531	396	4	-1.6391	447	0.99889	0.99978	1	18909	0
CCT2	0.0054338	0.003912	0.087573	837	4	-1.6391	448	0.99457	0.99892	1	18659	0
POLR2J	0.17324	0.1943	0.617332	5986	3	-1.638	449	0.89639	0.95943	1	16439	0
PPP2R1A	0.0090162	0.0062211	0.1085	1092	4	-1.6376	450	0.99098	0.99832	1	18534	0
RAD50	0.0014221	0.00079741	0.03443	442	3	-1.6372	451	0.88781	0.95245	1	16285	0
SRSF1	0.0045736	0.0031205	0.07678	774	4	-1.6362	452	0.99543	0.99914	1	18702	0
PSMC2	0.078224	0.09083	0.475024	3652	3	-1.6359	453	0.46793	0.66645	1	9736	1
LSG1	0.0031186	0.0026025	0.073058	632	4	-1.6356	454	0.94858	0.98355	1	17512	0
WWTR1	0.0042502	0.0030516	0.076495	750	3	-1.6354	455	0.089679	0.27049	1	3478	1
PSMA6	0.10655	0.12008	0.525599	4354	2	-1.6353	456	0.62106	0.75427	1	11674	1
NLRP3	0.015229	0.020194	0.26245	1440	3	-1.6345	457	0.64588	0.77	1	11995	1
EXOSC3	0.051168	0.05588	0.356768	2987	4	-1.6345	458	0.94883	0.98375	1	17520	0
SAP18	0.018697	0.022805	0.264604	1632	4	-1.6344	459	0.9813	0.99548	1	18259	0
MRPL40	2.3904e-05	4.9207e-06	0.001271	74	3	-1.6337	460	0.67525	0.79406	1	12453	1
TTI2	0.015741	0.02034	0.26245	1471	3	-1.6298	461	0.93227	0.97606	1	17191	0
MRPL10	0.017093	0.021309	0.26245	1551	4	-1.6298	462	0.98291	0.99599	1	18301	0
HK2	0.0063448	0.0049303	0.10256	910	4	-1.6288	463	0.99366	0.99875	1	18630	0
GEMIN8	1.0624e-06	2.5898e-07	0.000183	24	4	-1.6272	464	0.99941	0.99989	1	18957	0
VARS	0.042351	0.046476	0.332284	2640	3	-1.6262	465	0.84182	0.92953	1	15465	0
ILF2	9.3943e-06	2.3309e-06	0.000874	46	4	-1.6258	466	0.99999	1	1	19083	0
MCMBP	2.3113e-05	4.9207e-06	0.001271	72	4	-1.6258	467	0.99998	1	1	19070	0
PDSS2	0.00026767	0.00011007	0.009607	218	4	-1.6224	468	0.99973	0.99996	1	19001	0
MMS19	0.0016221	0.00098751	0.040098	465	4	-1.6217	469	0.99838	0.99966	1	18875	0
DUX4	0.12317	0.15052	0.580683	4754	3	-1.6217	470	0.44486	0.64987	1	9497	1
HNRNPH1	7.802e-05	5.3092e-05	0.007535	125	4	-1.6208	471	0.99972	0.99996	1	18998	0
POLR3K	0.00015814	8.8314e-05	0.008937	171	4	-1.6188	472	0.99984	0.99998	1	19021	0
RAN	0.0093573	0.0064935	0.111033	1115	4	-1.6176	473	0.99064	0.99816	1	18512	0
GGPS1	0.015385	0.020195	0.26245	1450	3	-1.6174	474	0.91988	0.96984	1	16926	0
RRP9	0.048637	0.054493	0.356768	2874	3	-1.6171	475	0.41866	0.63201	1	9240	1
FLII	0.00035389	0.00015979	0.012069	253	4	-1.6158	476	0.99965	0.99995	1	18977	0
SH2B1	0.0080217	0.0056202	0.104208	1021	4	-1.6138	477	0.9643	0.98949	1	17832	0
DCTN5	0.00054251	0.0002753	0.018056	291	4	-1.6135	478	0.99946	0.99991	1	18960	0
NDUFA6	0.00016382	8.8832e-05	0.008937	175	4	-1.6132	479	0.99984	0.99998	1	19019	0
MECR	7.7794e-06	2.3309e-06	0.000874	42	4	-1.6113	480	0.98756	0.99744	1	18417	0
SMC2	0.020022	0.023629	0.264604	1699	3	-1.6098	481	0.85274	0.93537	1	15654	0
FUT5	0.0039289	0.0029164	0.076495	727	4	-1.6058	482	0.99154	0.99836	1	18552	0
ATXN10	0.00049883	0.00025614	0.017181	280	4	-1.601	483	0.9962	0.99921	1	18735	0
TSR3	0.009641	0.0068685	0.115982	1130	4	-1.6005	484	0.99036	0.9981	1	18503	0
CCNB1	0.00059647	0.0003271	0.020136	306	3	-1.5999	485	0.2246	0.47944	1	6500	1
TAF1B	0.0061155	0.0048049	0.10256	894	4	-1.5988	486	0.95718	0.98711	1	17692	0
TBC1D3L	0.089238	0.1073	0.520833	3928	3	-1.598	487	0.75758	0.86192	1	13930	0
ZNF574	0.00070589	0.00042033	0.024274	327	3	-1.5934	488	0.19722	0.44118	1	5875	1
USP24	0.038973	0.039852	0.303501	2508	4	-1.5916	489	0.96103	0.98844	1	17761	0
MRPS12	1.3567e-05	2.8488e-06	0.000955	54	4	-1.5895	490	0.99999	1	1	19081	0
DNAJC5	0.0056192	0.004116	0.091074	856	4	-1.5887	491	0.99438	0.99891	1	18650	0
MRPL39	0.015123	0.020194	0.26245	1435	4	-1.5879	492	0.97323	0.99276	1	18030	0
NARFL	0.001237	0.00073992	0.03358	415	4	-1.5856	493	0.99876	0.99976	1	18898	0
PPP1R11	0.0071006	0.0053307	0.104208	955	4	-1.5851	494	0.99257	0.99858	1	18594	0
CREBBP	0.0018305	0.0010585	0.04106	490	4	-1.5835	495	0.99817	0.99964	1	18857	0
USB1	0.001716	0.0010258	0.04059	476	3	-1.5824	496	0.70985	0.8233	1	13060	1
DYNLRB1	0.055005	0.060762	0.367648	3103	3	-1.5794	497	0.90501	0.96327	1	16615	0
TEAD1	0.00015338	8.8314e-05	0.008937	167	4	-1.5787	498	0.99985	0.99998	1	19024	0
HGC6.3	0.088118	0.10331	0.506463	3898	3	-1.5761	499	0.82834	0.92156	1	15239	0
SF3B5	0.072033	0.083697	0.452947	3504	3	-1.5755	500	0.93454	0.97749	1	17239	0
C10orf76	0.0064741	0.0049308	0.10256	915	3	-1.5753	501	0.7271	0.83582	1	13365	0
FANCL	0.00097597	0.00058712	0.029379	376	3	-1.5751	502	0.89472	0.95794	1	16404	0
ATR	0.0084228	0.0057679	0.104208	1056	3	-1.5736	503	0.76164	0.86551	1	13996	0
SF3B2	0.032162	0.034022	0.288144	2239	3	-1.572	504	0.92343	0.97155	1	16983	0
TMEM258	0.0028931	0.0023291	0.072864	604	3	-1.5692	505	0.91956	0.96984	1	16916	0
LSM2	0.0090905	0.0062402	0.108636	1098	4	-1.5687	506	0.99091	0.9983	1	18529	0
FIP1L1	0.0098258	0.010952	0.180451	1144	4	-1.5668	507	0.98528	0.99657	1	18362	0
ATP6AP1	0.0077213	0.0055058	0.104208	995	3	-1.5659	508	0.35494	0.60406	1	8611	1
SETD2	0.0035853	0.0027123	0.073058	698	4	-1.5645	509	0.99537	0.99914	1	18698	0
QRSL1	0.0009886	0.00058712	0.029379	379	4	-1.5639	510	0.9569	0.98711	1	17684	0
MRPL53	1.846e-06	7.7695e-07	0.000424	28	4	-1.5634	511	0.98853	0.99783	1	18444	0
CYCS	5.7373e-05	4.5322e-05	0.007535	108	4	-1.5615	512	0.99994	0.99999	1	19051	0
MAPRE1	0.00038917	0.00018725	0.013713	261	3	-1.5613	513	0.20281	0.45211	1	6011	1
CDAN1	0.0054912	0.003912	0.087573	843	4	-1.5609	514	0.97123	0.99205	1	17986	0
MTG2	0.0076677	0.0055052	0.104208	990	4	-1.5609	515	0.99233	0.99852	1	18584	0
BMP8A	0.014965	0.019856	0.26245	1425	3	-1.5609	516	0.35192	0.60304	1	8580	1
COPE	0.12871	0.15293	0.580683	4896	2	-1.5595	517	0.78282	0.88339	1	14408	0
DIS3	0.011713	0.015653	0.238072	1252	4	-1.5593	518	0.98829	0.99766	1	18437	0
RAD51	0.044376	0.047821	0.332284	2723	4	-1.559	519	0.95562	0.98679	1	17655	0
SRSF11	0.0061784	0.0048277	0.10256	897	4	-1.5588	520	0.95336	0.98582	1	17613	0
FAM98B	0.041391	0.045018	0.33008	2598	2	-1.5588	521	0.69636	0.80755	1	12796	1
EHMT2	4.6553e-05	3.9625e-05	0.007535	100	4	-1.5586	522	0.99995	0.99999	1	19055	0
MYC	0.1354	0.15675	0.580683	5049	3	-1.5581	523	0.56536	0.7248	1	10928	1
PWP1	0.010579	0.014803	0.23662	1187	4	-1.5578	524	0.96686	0.99071	1	17879	0
SLCO5A1	0.063305	0.067665	0.38935	3298	3	-1.5577	525	0.4632	0.66225	1	9687	1
WDR82	9.1711e-05	5.361e-05	0.007535	136	2	-1.5568	526	0.371	0.60817	1	8765	1
MTPAP	0.011394	0.015509	0.238072	1234	3	-1.556	527	0.87104	0.94232	1	15990	0
RPL29	0.0049761	0.0033909	0.079738	800	3	-1.5556	528	0.86458	0.94137	1	15871	0
TERF2	0.014987	0.019907	0.26245	1427	4	-1.5556	529	0.98501	0.99646	1	18355	0
MRPL34	9.5275e-06	2.3309e-06	0.000874	48	4	-1.5549	530	0.99998	1	1	19077	0
ATP6V0D1	0.0011448	0.00071868	0.033531	402	3	-1.5549	531	0.83748	0.92731	1	15394	0
CCDC115	0.0038574	0.0029159	0.076495	722	4	-1.5537	532	0.98885	0.99784	1	18456	0
USP48	0.0029704	0.0023881	0.073058	614	4	-1.5531	533	0.97219	0.99246	1	18006	0
COX17	0.0015745	0.00091085	0.037932	459	4	-1.5519	534	0.99825	0.99964	1	18867	0
GTF2B	0.0011595	0.00071868	0.033531	407	3	-1.551	535	0.85485	0.93589	1	15696	0
PPIL2	0.0023887	0.0017764	0.060116	556	4	-1.5494	536	0.99761	0.99954	1	18816	0
ZNF764	0.017333	0.021779	0.264604	1559	4	-1.5491	537	0.95151	0.985	1	17581	0
NSMCE1	0.0055002	0.003912	0.087573	844	4	-1.5482	538	0.98037	0.99541	1	18221	0
GFM1	8.6099e-07	2.5898e-07	0.000183	21	4	-1.5465	539	1	1	1	19098	0
PAX8	0.01224	0.016171	0.239075	1283	4	-1.546	540	0.98776	0.99744	1	18423	0
CDK1	0.10977	0.12256	0.528607	4429	3	-1.5454	541	0.74916	0.85823	1	13770	0
POLE3	0.010649	0.014842	0.23662	1193	3	-1.5447	542	0.47045	0.66851	1	9759	1
DNM1L	0.038176	0.039015	0.300474	2482	3	-1.5438	543	0.9211	0.97071	1	16945	0
RPS16	0.010894	0.015132	0.237928	1212	3	-1.5427	544	0.93885	0.97882	1	17328	0
SF3A2	0.068955	0.071435	0.397751	3427	3	-1.5424	545	0.266	0.54297	1	7403	1
TARS2	0.0003239	0.00015099	0.011584	246	4	-1.5419	546	0.99968	0.99995	1	18984	0
GABRB3	0.022113	0.025996	0.276679	1793	3	-1.5414	547	0.56834	0.72688	1	10972	1
SPDL1	0.013238	0.01801	0.258642	1329	3	-1.5412	548	0.27323	0.54744	1	7553	1
RPL17-C18orf32	0.03307	0.034314	0.288691	2270	4	-1.5404	549	0.96693	0.99071	1	17881	0
INTS6	0.00028551	0.00012405	0.010045	229	4	-1.5396	550	0.99971	0.99996	1	18993	0
HTRA2	0.01007	0.011075	0.180451	1158	4	-1.5396	551	0.98993	0.99805	1	18493	0
USP39	0.06833	0.071434	0.397751	3416	3	-1.5395	552	0.84808	0.93224	1	15565	0
KIAA0391	0.039323	0.043615	0.329939	2522	4	-1.5381	553	0.96068	0.98829	1	17755	0
DDX42	0.010721	0.015063	0.237928	1200	4	-1.5355	554	0.9651	0.98974	1	17853	0
SNRPG	0.03742	0.038187	0.295525	2441	4	-1.5352	555	0.96258	0.98897	1	17793	0
EIF6	0.0081634	0.0057383	0.104208	1031	3	-1.5306	556	0.84959	0.93382	1	15599	0
RBBP6	0.048019	0.051251	0.341351	2851	3	-1.5303	557	0.57292	0.72896	1	11036	1
POLE4	0.0001191	7.3811e-05	0.008937	148	4	-1.5296	558	0.99988	0.99998	1	19032	0
MFSD3	0.023348	0.027308	0.281442	1842	3	-1.5274	559	0.66666	0.78669	1	12320	1
USE1	0.00016495	8.8832e-05	0.008937	177	4	-1.5271	560	0.99984	0.99998	1	19018	0
MTOR	0.056585	0.061201	0.367648	3153	3	-1.5269	561	0.72286	0.83273	1	13289	0
VDAC1	0.0075031	0.0054084	0.104208	979	4	-1.5267	562	0.9925	0.99858	1	18590	0
MCM7	0.0058418	0.004373	0.096079	867	4	-1.5266	563	0.99334	0.99872	1	18619	0
UBE2I	0.0050212	0.0033914	0.079738	805	4	-1.5261	564	0.99498	0.99907	1	18678	0
LOC102724862	0.031802	0.033893	0.288144	2226	3	-1.526	565	0.85548	0.93689	1	15710	0
PAPOLA	0.01698	0.021258	0.26245	1543	3	-1.5253	566	0.8136	0.90963	1	14972	0
COPS5	0.0033332	0.0026662	0.073058	664	3	-1.5246	567	0.92675	0.97373	1	17060	0
DDX47	0.16318	0.18175	0.604177	5736	3	-1.5235	568	0.40366	0.6279	1	9091	1
RBM17	2.5177e-05	5.4387e-06	0.001368	76	4	-1.5231	569	0.99997	1	1	19069	0
HECTD1	0.002739	0.0021555	0.070192	587	4	-1.5228	570	0.9857	0.99658	1	18379	0
XRCC5	0.0036069	0.0027123	0.073058	702	4	-1.5216	571	0.99639	0.99924	1	18744	0
VPS41	0.007497	0.0054084	0.104208	978	3	-1.5202	572	0.92455	0.97185	1	17012	0
TUBA1B	0.0060252	0.0047506	0.101699	888	4	-1.5182	573	0.99397	0.99885	1	18636	0
CCT5	0.088662	0.10382	0.506767	3912	3	-1.5182	574	0.89026	0.95329	1	16332	0
EIF3G	0.0047305	0.0031977	0.077877	784	4	-1.5179	575	0.99527	0.9991	1	18694	0
C8orf33	0.011906	0.015767	0.238072	1262	4	-1.5167	576	0.98809	0.99753	1	18430	0
NCOR2	0.0045505	0.0030894	0.076495	771	3	-1.5164	577	0.62004	0.75427	1	11666	1
GABPA	0.02845	0.031406	0.286696	2080	4	-1.5162	578	0.97155	0.99216	1	17995	0
FKBPL	0.0015123	0.00091033	0.037932	448	3	-1.5161	579	0.89942	0.96018	1	16503	0
EWSR1	0.0050289	0.0033914	0.079738	807	3	-1.5157	580	0.56337	0.72273	1	10899	1
ADCK4	8.2535e-05	5.3092e-05	0.007535	128	4	-1.5143	581	0.9948	0.99898	1	18671	0
NLE1	0.016741	0.02111	0.26245	1528	4	-1.5143	582	0.98326	0.9961	1	18311	0
VPS36	0.0024605	0.0017769	0.060116	562	3	-1.5138	583	0.32	0.59061	1	8306	1
GET4	0.0027972	0.0023166	0.072864	592	3	-1.5125	584	0.85689	0.93787	1	15734	0
DRAP1	0.0035577	0.0027118	0.073058	694	4	-1.5112	585	0.99644	0.99925	1	18748	0
FAM124A	0.016422	0.021002	0.26245	1511	3	-1.5094	586	0.53206	0.69879	1	10467	1
PSMB3	0.0060443	0.0047506	0.101699	889	4	-1.5093	587	0.99396	0.99885	1	18635	0
ANAPC13	0.012213	0.016171	0.239075	1280	3	-1.5083	588	0.66955	0.79095	1	12365	1
TNPO1	0.0035894	0.0027123	0.073058	700	3	-1.5079	589	0.92905	0.9745	1	17116	0
PNKP	0.015299	0.020195	0.26245	1444	3	-1.5073	590	0.90804	0.96426	1	16671	0
LEO1	0.050996	0.055731	0.356768	2979	4	-1.5073	591	0.949	0.98393	1	17526	0
SUFU	0.014918	0.019856	0.26245	1421	4	-1.5051	592	0.98131	0.99548	1	18260	0
ZNF638	0.0084359	0.0057679	0.104208	1057	3	-1.503	593	0.85699	0.93787	1	15736	0
NOL10	0.12975	0.15294	0.580683	4917	3	-1.5025	594	0.91164	0.96621	1	16747	0
GTF3A	0.040268	0.044283	0.33008	2560	3	-1.5023	595	0.068994	0.23893	1	2984	1
NAA20	0.0042152	0.0030516	0.076495	748	3	-1.502	596	0.15483	0.37849	1	4909	1
PSMA2	0.0063508	0.0049303	0.10256	911	4	-1.5018	597	0.96251	0.98897	1	17790	0
VHL	0.0033856	0.0026867	0.073058	670	4	-1.5007	598	0.99661	0.99927	1	18761	0
NMUR2	0.042197	0.045909	0.332284	2632	3	-1.4994	599	0.70344	0.81698	1	12922	1
C9orf171	0.0017256	0.0010264	0.04059	478	4	-1.499	600	0.99827	0.99964	1	18869	0
CDC27	0.10094	0.11815	0.525599	4216	3	-1.4989	601	0.78407	0.88737	1	14431	0
SERBP1	0.019544	0.023508	0.264604	1674	4	-1.4959	602	0.94764	0.98319	1	17492	0
PLEKHA3	0.029815	0.03249	0.287251	2138	3	-1.4951	603	0.60974	0.74899	1	11518	1
AUP1	0.0081151	0.0056782	0.104208	1030	4	-1.4949	604	0.97	0.99153	1	17954	0
MRPL57	0.0069725	0.0052877	0.104208	946	4	-1.4948	605	0.99303	0.99866	1	18611	0
PABPC1	0.0023813	0.0017764	0.060116	555	4	-1.4942	606	0.99589	0.99914	1	18720	0
RPA3	0.040402	0.04472	0.33008	2564	3	-1.4941	607	0.29724	0.57982	1	8058	1
NDUFB10	0.00027174	0.00011628	0.010045	221	3	-1.4937	608	0.91056	0.96557	1	16726	0
C21orf59	0.00025913	0.00010851	0.009607	214	4	-1.4933	609	0.99974	0.99996	1	19004	0
ZMYND11	0.028961	0.031721	0.286696	2101	3	-1.4927	610	0.81621	0.91288	1	15025	0
ARMC7	0.0028057	0.0023171	0.072864	596	4	-1.4907	611	0.99719	0.9994	1	18795	0
NCAPG	0.0021475	0.0014257	0.051149	530	4	-1.4896	612	0.99785	0.99959	1	18834	0
EIF4A1	0.025007	0.028946	0.284674	1917	4	-1.4896	613	0.97499	0.99344	1	18082	0
ANAPC11	5.1163e-05	4.4804e-05	0.007535	105	4	-1.489	614	0.99765	0.99954	1	18818	0
CHCHD1	7.6808e-05	5.2056e-05	0.007535	123	3	-1.4871	615	0.86866	0.94232	1	15944	0
ATL2	0.0088429	0.0061859	0.1085	1077	3	-1.4855	616	0.8529	0.93537	1	15661	0
INTS5	4.3626e-05	3.9107e-05	0.007535	97	4	-1.483	617	0.99996	0.99999	1	19057	0
MTIF2	0.0016301	0.00098803	0.040098	469	4	-1.4826	618	0.99837	0.99966	1	18871	0
SBDS	7.8927e-05	5.3092e-05	0.007535	126	3	-1.4823	619	0.78791	0.89048	1	14501	0
MED11	0.06493	0.070794	0.397751	3337	3	-1.4816	620	0.23424	0.49304	1	6703	1
ANAPC2	0.015347	0.020195	0.26245	1448	4	-1.481	621	0.98465	0.99646	1	18341	0
IPO11	0.0062335	0.0048863	0.10256	900	4	-1.4799	622	0.99377	0.99879	1	18632	0
INO80	0.023754	0.027949	0.284674	1866	3	-1.4798	623	0.93676	0.97772	1	17287	0
IDI1	0.00066003	0.0003561	0.021405	318	3	-1.4788	624	0.35367	0.60406	1	8601	1
COMMD3	0.0013887	0.00076944	0.03358	435	4	-1.4767	625	0.99861	0.99972	1	18887	0
PTPN11	0.014392	0.019519	0.26245	1391	3	-1.4767	626	0.9085	0.96493	1	16681	0
SF3A1	0.031856	0.033893	0.288144	2229	3	-1.4757	627	0.90676	0.96361	1	16649	0
LIG3	0.014095	0.019289	0.26245	1377	3	-1.4752	628	0.68582	0.80342	1	12627	1
RPS7	0.020715	0.024546	0.270058	1727	4	-1.4742	629	0.97929	0.99497	1	18198	0
TAF10	0.010914	0.015132	0.237928	1213	4	-1.4741	630	0.98909	0.99788	1	18461	0
HSD17B10	0.010933	0.015132	0.237928	1215	3	-1.4733	631	0.60646	0.74794	1	11466	1
TRAPPC5	0.013631	0.018282	0.260209	1343	4	-1.4726	632	0.98273	0.99581	1	18297	0
GLRX5	0.00093788	0.00055967	0.028604	374	4	-1.4724	633	0.99906	0.99982	1	18922	0
ANGPTL6	0.034821	0.035879	0.292019	2328	3	-1.4722	634	0.88053	0.94907	1	16161	0
XRCC4	0.0051438	0.0034173	0.080051	816	3	-1.4713	635	0.84211	0.92953	1	15471	0
CDH19	0.092608	0.10981	0.52092	4018	3	-1.4709	636	0.64095	0.77	1	11925	1
WDR74	0.016216	0.021002	0.26245	1496	4	-1.4694	637	0.98378	0.99623	1	18318	0
SOD2	0.0021542	0.0014262	0.051149	531	4	-1.4687	638	0.97506	0.99363	1	18085	0
LSM8	0.024414	0.028705	0.284674	1892	4	-1.4674	639	0.95333	0.98582	1	17611	0
HAUS3	0.03354	0.035016	0.292019	2286	3	-1.4664	640	0.90971	0.96557	1	16704	0
SKA2	5.5622e-05	4.5322e-05	0.007535	107	4	-1.4658	641	0.99994	0.99999	1	19052	0
TPT1	0.00012577	7.6401e-05	0.008937	156	4	-1.4657	642	0.99954	0.99992	1	18968	0
GMPPB	0.011431	0.015509	0.238072	1236	4	-1.4656	643	0.96807	0.99105	1	17906	0
ARHGEF1	0.03232	0.034022	0.288144	2243	4	-1.465	644	0.94767	0.98319	1	17494	0
DPY30	0.0077617	0.0055058	0.104208	1001	3	-1.4646	645	0.91143	0.96589	1	16744	0
TSEN34	0.0017632	0.0010336	0.04059	480	3	-1.4634	646	0.92097	0.97071	1	16943	0
POLR1B	0.0020577	0.0013729	0.04991	523	4	-1.4629	647	0.99794	0.99959	1	18839	0
RBM42	0.031529	0.033313	0.287251	2212	3	-1.4626	648	0.89408	0.95641	1	16395	0
MRPL35	0.074258	0.08457	0.452947	3552	3	-1.4625	649	0.93338	0.97681	1	17212	0
PIK3C3	1.1033e-07	2.5898e-07	0.000183	11	4	-1.4618	650	0.99992	0.99998	1	19041	0
RPL10	0.035207	0.036114	0.292019	2348	4	-1.4616	651	0.96479	0.98974	1	17843	0
TRRAP	0.00099482	0.00058712	0.029379	382	4	-1.4609	652	0.98694	0.99717	1	18409	0
TMEM208	0.0061	0.0047511	0.101699	892	3	-1.4592	653	0.93501	0.97749	1	17250	0
RINT1	0.039243	0.043496	0.329929	2518	3	-1.4576	654	0.80871	0.90698	1	14885	0
CCAR1	0.00026876	0.00011577	0.010045	220	4	-1.4553	655	0.99973	0.99996	1	19000	0
C15orf41	0.00017573	8.8832e-05	0.008937	181	4	-1.4546	656	0.99982	0.99998	1	19014	0
SRC	0.0065791	0.0050696	0.103987	927	4	-1.4546	657	0.99342	0.99872	1	18622	0
BLM	0.0070256	0.0053307	0.104208	950	4	-1.4534	658	0.96695	0.99071	1	17882	0
PTCD3	0.00011401	7.0703e-05	0.008937	147	4	-1.4515	659	0.99983	0.99998	1	19017	0
PRMT1	6.3753e-05	4.7912e-05	0.007535	115	4	-1.4514	660	0.99994	0.99999	1	19047	0
SNRPE	0.013267	0.01801	0.258642	1331	3	-1.4514	661	0.49562	0.67164	1	10041	1
U2SURP	0.0085167	0.006075	0.1085	1063	4	-1.4485	662	0.96951	0.99129	1	17942	0
RPS27	0.0096429	0.0068685	0.115982	1131	4	-1.4466	663	0.97106	0.99194	1	17982	0
AGGF1	0.091652	0.10902	0.520855	3995	3	-1.446	664	0.70017	0.81176	1	12861	1
CPSF2	0.014358	0.019423	0.26245	1389	3	-1.4458	665	0.93416	0.97707	1	17232	0
RABGGTA	0.0052365	0.0036949	0.085342	821	4	-1.4457	666	0.99476	0.99896	1	18669	0
AARS2	0.0063123	0.0049085	0.10256	905	4	-1.4436	667	0.98945	0.99793	1	18476	0
ATP13A1	0.012884	0.01749	0.254617	1313	3	-1.4425	668	0.60254	0.74582	1	11420	1
CENPU	0.0017779	0.0010341	0.04059	483	3	-1.4412	669	0.79635	0.89649	1	14668	0
MYBBP1A	0.015726	0.020288	0.26245	1470	4	-1.4412	670	0.98427	0.99646	1	18328	0
GTF2A2	0.0079599	0.0055643	0.104208	1015	3	-1.4408	671	0.81923	0.9148	1	15078	0
EMC6	0.0045163	0.0030894	0.076495	769	4	-1.4404	672	0.99122	0.99836	1	18542	0
KIF18A	0.00066811	0.00037423	0.022285	321	4	-1.4377	673	0.99933	0.99985	1	18947	0
TAF6L	1.3438e-05	2.8488e-06	0.000955	53	4	-1.4371	674	0.95672	0.98711	1	17682	0
WDR1	0.0052421	0.0036949	0.085342	822	4	-1.4354	675	0.99476	0.99896	1	18668	0
CDK5RAP3	0.0045689	0.0030894	0.076495	772	3	-1.4352	676	0.91806	0.96984	1	16886	0
HUWE1	0.00054518	0.00027582	0.018056	292	4	-1.4349	677	0.99945	0.99991	1	18959	0
ACTR2	0.0015389	0.00091033	0.037932	454	3	-1.4347	678	0.92371	0.97155	1	16991	0
CDC42	5.2687e-05	4.4804e-05	0.007535	106	4	-1.4334	679	0.99995	0.99999	1	19053	0
RTFDC1	0.061559	0.063633	0.372771	3261	3	-1.4333	680	0.63823	0.76793	1	11893	1
FNTA	0.012804	0.017455	0.254617	1309	3	-1.4332	681	0.73864	0.84884	1	13568	0
MGME1	0.015859	0.020679	0.26245	1477	4	-1.4324	682	0.9725	0.99256	1	18015	0
NOSIP	0.00092701	0.00055915	0.028604	371	4	-1.4316	683	0.97871	0.99482	1	18184	0
AASDHPPT	0.00013606	8.8314e-05	0.008937	159	3	-1.4315	684	0.93922	0.97882	1	17338	0
WDR44	0.0018834	0.0011574	0.043949	498	4	-1.4293	685	0.99812	0.99961	1	18854	0
DNAJA3	0.0081949	0.0057388	0.104208	1033	3	-1.4282	686	0.71685	0.82961	1	13187	1
BTF3	0.0033538	0.0026662	0.073058	667	3	-1.427	687	0.12507	0.32989	1	4273	1
NUF2	0.014972	0.019907	0.26245	1426	3	-1.4268	688	0.89529	0.95873	1	16411	0
RPAP1	0.031473	0.033313	0.287251	2207	4	-1.4255	689	0.96853	0.99105	1	17923	0
NEDD8	0.006877	0.0051727	0.104208	944	4	-1.4233	690	0.99312	0.99866	1	18613	0
DDX1	7.2862e-06	1.8129e-06	0.000845	40	4	-1.4226	691	0.99503	0.99907	1	18683	0
TTC1	1.6525e-05	3.3668e-06	0.001091	59	4	-1.4226	692	0.99998	1	1	19078	0
KANSL1	0.034279	0.035503	0.292019	2312	3	-1.4226	693	0.9213	0.97099	1	16951	0
DTYMK	0.00066432	0.00037372	0.022285	320	3	-1.4219	694	0.23136	0.4907	1	6642	1
ARL5B	0.0028025	0.0023171	0.072864	595	4	-1.4205	695	0.9972	0.9994	1	18796	0
POP7	0.0061891	0.0048277	0.10256	899	4	-1.4192	696	0.98074	0.99548	1	18241	0
AURKB	0.0014182	0.00079016	0.034249	439	3	-1.4188	697	0.77245	0.87428	1	14207	0
ZWILCH	0.0013289	0.00076012	0.03358	429	3	-1.4181	698	0.33629	0.59894	1	8449	1
LRR1	0.12678	0.15233	0.580683	4840	3	-1.4177	699	0.92777	0.97399	1	17087	0
TAMM41	0.00042206	0.00021314	0.015183	266	3	-1.4165	700	0.41879	0.63201	1	9241	1
KDM8	0.0085358	0.006075	0.1085	1067	3	-1.416	701	0.57411	0.72896	1	11043	1
GNB1	0.019305	0.023112	0.264604	1661	4	-1.4151	702	0.97366	0.99285	1	18042	0
UBE2C	0.015176	0.020194	0.26245	1438	3	-1.4139	703	0.67627	0.79721	1	12467	1
DOLPP1	0.0035393	0.0027118	0.073058	690	4	-1.413	704	0.99646	0.99925	1	18750	0
TMEM199	0.0055097	0.0039125	0.087573	845	4	-1.413	705	0.99449	0.99892	1	18656	0
LOC101060389	0.013703	0.01838	0.260246	1349	4	-1.4107	706	0.9863	0.99691	1	18396	0
NCAPD3	0.00011272	7.0703e-05	0.008937	146	3	-1.41	707	0.8732	0.94414	1	16027	0
PINX1	0.0077034	0.0055058	0.104208	993	3	-1.4076	708	0.88809	0.95245	1	16290	0
HIST1H2BJ	0.047603	0.05084	0.341351	2842	3	-1.4075	709	0.88977	0.95329	1	16324	0
RHOA	0.026332	0.029928	0.284674	1986	3	-1.4072	710	0.76433	0.86731	1	14051	0
MDN1	0.083549	0.098874	0.500661	3770	3	-1.4071	711	0.7754	0.87937	1	14257	0
MCM6	0.002939	0.0023291	0.072864	610	4	-1.4066	712	0.99706	0.99939	1	18791	0
DPH1	0.020244	0.023727	0.265084	1708	4	-1.4052	713	0.97564	0.99371	1	18099	0
POLRMT	0.0034849	0.0027118	0.073058	683	4	-1.4044	714	0.99652	0.99925	1	18753	0
MLEC	0.01605	0.02081	0.26245	1488	3	-1.4043	715	0.37457	0.60919	1	8804	1
SUGT1	0.085396	0.10283	0.506463	3817	3	-1.4034	716	0.65434	0.77831	1	12126	1
AGAP4	0.041678	0.045137	0.330198	2611	4	-1.4008	717	0.95832	0.9874	1	17716	0
TLN1	0.020373	0.023862	0.265961	1712	4	-1.3995	718	0.97963	0.99511	1	18205	0
CDA	0.0082897	0.0057673	0.104208	1041	3	-1.3977	719	0.37671	0.6102	1	8822	1
MED4	0.0012898	0.00075598	0.03358	420	4	-1.3963	720	0.99309	0.99866	1	18612	0
MRE11A	4.6771e-05	4.0661e-05	0.007535	101	3	-1.3957	721	0.9239	0.97155	1	16996	0
NDUFA1	0.0031161	0.0026025	0.073058	631	4	-1.3951	722	0.94882	0.98375	1	17518	0
CWF19L2	0.024138	0.028233	0.284674	1877	4	-1.3947	723	0.97586	0.99381	1	18105	0
XPO1	0.026008	0.029842	0.284674	1971	4	-1.3942	724	0.97399	0.99296	1	18054	0
GLRX3	0.0042092	0.0030516	0.076495	746	4	-1.3939	725	0.9882	0.99763	1	18433	0
RPAIN	0.0091653	0.006364	0.1098	1101	4	-1.3934	726	0.99083	0.99824	1	18524	0
RFC3	0.0029341	0.0023291	0.072864	609	4	-1.3919	727	0.99707	0.99939	1	18792	0
NDUFA5	0.00288	0.0023291	0.072864	601	4	-1.3908	728	0.9955	0.99914	1	18704	0
SEC61B	0.0032051	0.0026559	0.073058	642	4	-1.3905	729	0.99679	0.99931	1	18774	0
GPR20	0.021602	0.025859	0.276679	1768	3	-1.3905	730	0.90847	0.96493	1	16680	0
CPSF3	0.03737	0.038187	0.295525	2438	3	-1.3905	731	0.85961	0.93939	1	15780	0
AURKAIP1	0.0026357	0.0018893	0.062051	579	4	-1.3896	732	0.9888	0.99784	1	18455	0
SMC6	0.013441	0.018237	0.259768	1338	3	-1.3894	733	0.90622	0.96361	1	16637	0
CD3EAP	0.016077	0.02081	0.26245	1489	4	-1.3876	734	0.9657	0.99011	1	17861	0
ATP5J2-PTCD1	0.0048071	0.0033686	0.079738	789	4	-1.387	735	0.99376	0.99879	1	18631	0
TBCC	0.019193	0.023112	0.264604	1654	4	-1.387	736	0.97814	0.99465	1	18165	0
RAC1	0.00030709	0.00012664	0.010045	237	4	-1.3861	737	0.99969	0.99996	1	18989	0
EIF3A	0.014138	0.01929	0.26245	1379	3	-1.386	738	0.9313	0.97556	1	17166	0
RPL21	0.0091806	0.006364	0.1098	1102	4	-1.3851	739	0.99082	0.99823	1	18523	0
ATP6AP2	0.0038325	0.0029159	0.076495	719	4	-1.3849	740	0.99617	0.99921	1	18731	0
DENR	0.0015179	0.00091033	0.037932	450	4	-1.3847	741	0.99848	0.99969	1	18882	0
PPP1R35	0.003545	0.0027118	0.073058	692	3	-1.3844	742	0.69774	0.80858	1	12819	1
NALCN	0.019274	0.023112	0.264604	1659	3	-1.3844	743	0.72768	0.83685	1	13379	0
DBR1	0.05681	0.061201	0.367648	3162	3	-1.3844	744	0.04776	0.18824	1	2240	1
MCTP1	0.20977	0.24097	0.663293	6865	3	-1.3836	745	0.29259	0.57431	1	7958	1
PIGA	0.0035376	0.0027118	0.073058	689	3	-1.3833	746	0.8579	0.93787	1	15751	0
FIS1	0.0015486	0.00091085	0.037932	455	4	-1.3824	747	0.99609	0.99921	1	18726	0
NDUFS1	0.0009916	0.00058712	0.029379	381	4	-1.3804	748	0.99901	0.99979	1	18918	0
SCAF11	0.007968	0.0055643	0.104208	1016	3	-1.3797	749	0.89018	0.95329	1	16330	0
CSTF1	0.016977	0.021258	0.26245	1542	3	-1.3797	750	0.63246	0.76793	1	11813	1
GINS3	0.025316	0.029388	0.284674	1936	3	-1.379	751	0.15837	0.39024	1	4984	1
CMPK1	0.0057993	0.0041362	0.091298	865	4	-1.3788	752	0.98072	0.99548	1	18239	0
ALDOA	0.00091483	0.00054413	0.028111	369	4	-1.3787	753	0.99909	0.99982	1	18924	0
RICTOR	0.029068	0.031722	0.286696	2103	3	-1.3787	754	0.80554	0.90429	1	14821	0
PDSS1	0.019558	0.023508	0.264604	1676	3	-1.378	755	0.8326	0.92386	1	15321	0
UTP15	0.080014	0.094038	0.48402	3687	3	-1.3766	756	0.87679	0.94642	1	16088	0
RPL18	0.024661	0.028706	0.284674	1903	4	-1.3764	757	0.97534	0.99371	1	18093	0
PTPN1	0.052803	0.060312	0.367648	3045	3	-1.3757	758	0.86686	0.94232	1	15909	0
PIGQ	0.014167	0.01929	0.26245	1383	3	-1.3729	759	0.93922	0.97882	1	17339	0
EGLN1	0.00082391	0.00045711	0.024503	347	3	-1.3726	760	0.82777	0.92156	1	15227	0
COQ2	0.0022277	0.0014671	0.051838	541	4	-1.3718	761	0.99777	0.99957	1	18827	0
TMX2	2.1915e-05	4.9207e-06	0.001271	70	4	-1.3714	762	0.99998	1	1	19071	0
SURF6	0.033605	0.035016	0.292019	2288	3	-1.371	763	0.37122	0.60817	1	8766	1
MCTS1	2.379e-06	7.7695e-07	0.000424	32	3	-1.3702	764	0.87444	0.94459	1	16051	0
RHOT2	0.0017782	0.0010341	0.04059	484	4	-1.3696	765	0.99822	0.99964	1	18865	0
LOC113230	0.13829	0.15818	0.580683	5128	3	-1.3681	766	0.37016	0.60817	1	8755	1
RPL8	0.25173	0.28594	0.681962	7926	3	-1.3681	767	0.19836	0.44358	1	5903	1
SPATA5L1	0.030725	0.033113	0.287251	2175	4	-1.368	768	0.95308	0.98582	1	17606	0
WDR81	0.0002854	0.00012405	0.010045	227	4	-1.3677	769	0.99971	0.99996	1	18994	0
MAD2L1BP	0.015307	0.020195	0.26245	1445	4	-1.3665	770	0.94953	0.9841	1	17537	0
STK11	0.011459	0.015509	0.238072	1237	4	-1.3661	771	0.98854	0.99783	1	18446	0
RFC2	7.9869e-05	5.3092e-05	0.007535	127	4	-1.3652	772	0.99992	0.99998	1	19042	0
SMNDC1	0.00036811	0.0001629	0.012069	257	3	-1.3647	773	0.3787	0.61123	1	8843	1
ZBTB17	0.028712	0.0315	0.286696	2087	3	-1.3638	774	0.77923	0.88179	1	14338	0
C19orf40	1.9475e-05	4.4027e-06	0.001238	65	4	-1.3637	775	0.99998	1	1	19074	0
COPS4	0.013186	0.018009	0.258642	1324	2	-1.3636	776	0.64171	0.77	1	11938	1
TP53I3	0.029116	0.031722	0.286696	2106	3	-1.3633	777	0.85132	0.93435	1	15630	0
CEPT1	5.8612e-05	4.584e-05	0.007535	109	4	-1.3624	778	0.9999	0.99998	1	19038	0
PAF1	0.061416	0.063431	0.372158	3257	3	-1.3615	779	0.74938	0.85823	1	13776	0
MRPS14	0.033919	0.035365	0.292019	2300	3	-1.3611	780	0.30037	0.58419	1	8117	1
ALG12	0.0030393	0.0024244	0.073058	617	4	-1.3596	781	0.99696	0.99936	1	18788	0
PDS5B	0.00036878	0.0001629	0.012069	258	4	-1.3595	782	0.99963	0.99994	1	18975	0
PRPF8	0.17408	0.1943	0.617332	6005	2	-1.3595	783	0.76569	0.86906	1	14068	0
MTX1	0.00032485	0.00015099	0.011584	247	4	-1.3591	784	0.99685	0.99935	1	18779	0
ASCC3	0.00060615	0.00032762	0.020136	311	3	-1.3587	785	0.40893	0.62895	1	9139	1
HIRA	0.00071301	0.00042033	0.024274	329	4	-1.3583	786	0.98448	0.99646	1	18337	0
VPS26A	0.000182	8.8832e-05	0.008937	187	3	-1.3577	787	0.71671	0.82856	1	13185	1
HNRNPL	0.015471	0.020288	0.26245	1455	4	-1.3567	788	0.98453	0.99646	1	18339	0
TBCD	0.00013799	8.8314e-05	0.008937	160	3	-1.3553	789	0.85711	0.93787	1	15739	0
CTAGE15	0.0065081	0.0049577	0.102684	922	3	-1.3546	790	0.75352	0.86009	1	13859	0
POLR1E	0.0090738	0.0062211	0.1085	1096	4	-1.3532	791	0.99093	0.99832	1	18531	0
FTSJ3	0.0024322	0.0017769	0.060116	559	4	-1.3531	792	0.98984	0.99805	1	18488	0
DCTN2	0.0022011	0.0014594	0.051838	537	4	-1.3529	793	0.9978	0.99958	1	18829	0
KIN	0.0097762	0.010952	0.180451	1137	3	-1.3529	794	0.90216	0.96154	1	16544	0
SHC1	0.0013234	0.00076012	0.03358	425	4	-1.351	795	0.9968	0.99931	1	18775	0
FBXW11	0.03071	0.033112	0.287251	2174	3	-1.3483	796	0.91652	0.96925	1	16856	0
ZC3H18	0.0065051	0.0049577	0.102684	920	3	-1.3473	797	0.92095	0.97071	1	16942	0
NSF	0.0049553	0.0033909	0.079738	797	4	-1.3466	798	0.99504	0.99907	1	18684	0
NHLRC2	0.015913	0.020679	0.26245	1481	4	-1.3455	799	0.98409	0.9964	1	18325	0
MRPS25	0.0027815	0.0023042	0.072864	591	3	-1.3445	800	0.93057	0.97529	1	17156	0
SRSF3	0.013762	0.018751	0.26245	1356	3	-1.344	801	0.92661	0.97373	1	17058	0
SETD1A	0.025859	0.029841	0.284674	1966	4	-1.3435	802	0.97414	0.99296	1	18056	0
SNX7	0.017988	0.022645	0.264604	1592	3	-1.342	803	0.68011	0.8003	1	12526	1
KIF11	0.10238	0.11815	0.525599	4255	3	-1.3409	804	0.91061	0.96557	1	16727	0
NDUFB11	0.023319	0.027308	0.281442	1839	3	-1.3406	805	0.86253	0.93939	1	15837	0
RRAGA	0.0055273	0.0039125	0.087573	848	3	-1.3404	806	0.34307	0.60203	1	8507	1
URI1	0.00082236	0.00045711	0.024503	346	4	-1.3399	807	0.99918	0.99982	1	18938	0
LAMTOR2	0.00031082	0.00012664	0.010045	240	4	-1.3397	808	0.99969	0.99996	1	18987	0
POLR3D	0.0076383	0.0055052	0.104208	986	4	-1.3396	809	0.99236	0.99852	1	18586	0
UPF1	0.017897	0.022587	0.264604	1588	3	-1.339	810	0.877	0.94685	1	16092	0
HIST2H3D	0.20155	0.20746	0.644272	6682	2	-1.3385	811	0.81492	0.90731	1	15002	0
2022-03-06	0.024826	0.028778	0.284674	1907	4	-1.3375	812	0.97517	0.99363	1	18089	0
RBMX	0.020957	0.024611	0.270058	1740	3	-1.337	813	0.81801	0.91352	1	15060	0
CTC1	0.00084466	0.00045763	0.024503	352	4	-1.3366	814	0.99916	0.99982	1	18936	0
UBN1	0.007909	0.0055638	0.104208	1010	4	-1.3354	815	0.97584	0.99381	1	18104	0
POLR2B	0.011989	0.015805	0.238072	1269	3	-1.3344	816	0.68457	0.8024	1	12609	1
EXOSC8	0.050442	0.055588	0.356768	2957	3	-1.3341	817	0.70954	0.8233	1	13051	1
MRPL27	0.0038802	0.0029164	0.076495	726	4	-1.3303	818	0.98814	0.99758	1	18431	0
RFC1	0.13749	0.15746	0.580683	5110	3	-1.3289	819	0.53802	0.70606	1	10557	1
RPS23	0.0015995	0.00097715	0.040098	461	3	-1.3286	820	0.91167	0.96621	1	16748	0
MYL6	0.01684	0.021207	0.26245	1534	3	-1.3286	821	0.94358	0.9814	1	17428	0
OR4F16	0.022174	0.026106	0.276912	1797	3	-1.3286	822	0.93835	0.9786	1	17318	0
PRKAR1A	0.013846	0.018884	0.26245	1359	3	-1.328	823	0.27656	0.55069	1	7628	1
SLC35G4	0.0033297	0.0026564	0.073058	663	4	-1.326	824	0.99667	0.99931	1	18766	0
PARG	0.020947	0.024611	0.270058	1739	4	-1.3247	825	0.96589	0.99011	1	17864	0
ARGLU1	0.042347	0.046476	0.332284	2639	3	-1.3224	826	0.8967	0.95943	1	16444	0
RSL1D1	0.0013677	0.00076893	0.03358	434	4	-1.3222	827	0.95374	0.98597	1	17619	0
CTR9	0.0019319	0.0011657	0.043949	505	4	-1.3222	828	0.99614	0.99921	1	18729	0
TOP3A	3.6994e-07	2.5898e-07	0.000183	17	4	-1.3215	829	1	1	1	19101	0
GSG2	0.0016297	0.00098803	0.040098	468	4	-1.3215	830	0.99837	0.99966	1	18872	0
SNRPA1	0.056082	0.0612	0.367648	3141	2	-1.3213	831	0.73361	0.84592	1	13477	0
KIAA0020	0.012819	0.01749	0.254617	1310	3	-1.3206	832	0.75311	0.85916	1	13850	0
LSM4	0.0011814	0.0007192	0.033531	410	4	-1.3205	833	0.99882	0.99978	1	18902	0
RPUSD4	9.7319e-06	2.3309e-06	0.000874	49	4	-1.3199	834	0.99999	1	1	19082	0
IK	0.0034198	0.002703	0.073058	671	4	-1.3186	835	0.99658	0.99926	1	18760	0
FABP5	0.037556	0.038187	0.295525	2452	3	-1.3182	836	0.93404	0.97707	1	17230	0
C16orf72	0.073735	0.084352	0.452947	3546	3	-1.3171	837	0.5697	0.72688	1	10987	1
ABCE1	0.0010497	0.00065912	0.032519	386	4	-1.3164	838	0.99348	0.99872	1	18625	0
FAM122A	0.00014036	8.8314e-05	0.008937	161	4	-1.3159	839	0.99986	0.99998	1	19027	0
CEP162	0.0091851	0.0063646	0.1098	1103	3	-1.3155	840	0.91441	0.96896	1	16820	0
KAT7	0.024189	0.028233	0.284674	1882	4	-1.3151	841	0.97581	0.99381	1	18102	0
MIS12	0.013197	0.018009	0.258642	1326	3	-1.3148	842	0.17696	0.41724	1	5388	1
FAM231A	0.010595	0.014803	0.23662	1190	4	-1.3137	843	0.98941	0.99793	1	18472	0
CAP1	0.00098843	0.00058712	0.029379	378	4	-1.3135	844	0.99901	0.99979	1	18920	0
POLR1D	0.0036901	0.0027284	0.073058	710	4	-1.3122	845	0.98745	0.9974	1	18413	0
CIRH1A	0.035711	0.036329	0.292019	2372	4	-1.312	846	0.96429	0.98949	1	17831	0
LRRC41	0.0046929	0.0031806	0.077659	781	4	-1.3114	847	0.99531	0.99912	1	18696	0
SLC6A14	0.016855	0.021207	0.26245	1536	3	-1.3112	848	0.79491	0.89425	1	14644	0
TRIB2	0.018879	0.023012	0.264604	1642	4	-1.3112	849	0.97137	0.99205	1	17991	0
GEMIN2	0.013131	0.017732	0.256777	1319	3	-1.3111	850	0.70292	0.81593	1	12911	1
CENPW	0.015767	0.02034	0.26245	1472	3	-1.31	851	0.68989	0.80449	1	12697	1
FRG2	0.034442	0.035613	0.292019	2316	3	-1.3097	852	0.17862	0.42166	1	5427	1
PAPD5	0.012036	0.015885	0.238717	1272	3	-1.3087	853	0.51461	0.6893	1	10256	1
NOC2L	0.019442	0.023445	0.264604	1668	4	-1.3085	854	0.98056	0.99548	1	18232	0
RRM2	0.021539	0.025859	0.276679	1766	4	-1.3081	855	0.97846	0.99474	1	18174	0
EIF4G1	0.0091164	0.006364	0.1098	1099	4	-1.3069	856	0.99088	0.99824	1	18527	0
EPRS	0.068835	0.071435	0.397751	3426	3	-1.3068	857	0.30211	0.5864	1	8140	1
NUP98	0.0077864	0.0055058	0.104208	1003	3	-1.3061	858	0.77733	0.88017	1	14302	0
DCUN1D1	0.0076298	0.0055052	0.104208	984	3	-1.3057	859	0.59243	0.7374	1	11289	1
RPAP2	0.04168	0.045138	0.330198	2612	3	-1.304	860	0.54065	0.70806	1	10591	1
PCID2	0.0082831	0.0057673	0.104208	1040	4	-1.3023	861	0.99172	0.99836	1	18561	0
DONSON	0.087465	0.10331	0.506463	3882	3	-1.3022	862	0.83975	0.92953	1	15431	0
C18orf21	0.021356	0.025385	0.275544	1758	3	-1.3016	863	0.55554	0.71641	1	10791	1
MRPS6	0.0036734	0.0027123	0.073058	709	3	-1.3013	864	0.92998	0.97504	1	17138	0
MRPL16	0.01402	0.019241	0.26245	1374	4	-1.301	865	0.98013	0.99534	1	18213	0
IMPDH1	0.056966	0.061201	0.367648	3169	3	-1.3007	866	0.4169	0.62998	1	9225	1
MCM2	9.4453e-06	2.3309e-06	0.000874	47	4	-1.2998	867	0.9981	0.99961	1	18853	0
PBX1	0.0029253	0.0023291	0.072864	607	3	-1.2998	868	0.68231	0.80135	1	12566	1
SLC31A1	0.0039978	0.0029625	0.076495	731	3	-1.2983	869	0.09434	0.28337	1	3585	1
TRPS1	0.0033197	0.0026564	0.073058	660	4	-1.2979	870	0.99668	0.99931	1	18767	0
C3orf38	0.014027	0.019241	0.26245	1375	3	-1.2978	871	0.14724	0.3656	1	4744	1
RERE	0.0092641	0.0063951	0.110029	1110	3	-1.2976	872	0.76898	0.87259	1	14140	0
TRNAU1AP	0.00044346	0.00022972	0.016062	272	3	-1.2974	873	0.93191	0.97606	1	17182	0
KCP	0.010274	0.011076	0.180451	1168	3	-1.2964	874	0.58746	0.7374	1	11233	1
MCM3	0.016695	0.02111	0.26245	1522	4	-1.2956	875	0.9833	0.9961	1	18312	0
TBC1D3B	0.00029354	0.00012509	0.010045	231	4	-1.2954	876	0.99971	0.99996	1	18992	0
RNF7	0.0026547	0.0020431	0.066989	583	3	-1.2952	877	0.41255	0.62895	1	9177	1
RAD21	0.01418	0.01929	0.26245	1384	3	-1.291	878	0.15442	0.37757	1	4897	1
PPME1	0.0038654	0.0029164	0.076495	723	4	-1.2903	879	0.99441	0.99891	1	18653	0
SNRNP48	0.024791	0.028778	0.284674	1905	3	-1.2897	880	0.89856	0.95981	1	16486	0
MRPL46	0.00012214	7.4329e-05	0.008937	150	4	-1.2874	881	0.99988	0.99998	1	19030	0
COMT	0.048143	0.051251	0.341351	2856	3	-1.2871	882	0.83048	0.9233	1	15281	0
MDM4	0.099865	0.1179	0.525599	4186	3	-1.2842	883	0.20855	0.45954	1	6146	1
RCOR1	0.0021254	0.0014003	0.050696	527	4	-1.2832	884	0.99565	0.99914	1	18710	0
PPM1D	0.0087701	0.0061853	0.1085	1075	4	-1.2827	885	0.99123	0.99836	1	18543	0
C17orf85	0.0039759	0.002947	0.076495	729	3	-1.2822	886	0.55258	0.71433	1	10760	1
CYB5B	0.0041345	0.0030516	0.076495	741	3	-1.2822	887	0.79763	0.89722	1	14691	0
ZCCHC9	0.011549	0.015577	0.238072	1243	3	-1.2821	888	0.89573	0.95873	1	16422	0
NOA1	0.022831	0.026516	0.278187	1821	4	-1.2819	889	0.97717	0.99451	1	18142	0
EBNA1BP2	0.010798	0.015132	0.237928	1204	4	-1.2784	890	0.9892	0.99788	1	18465	0
SRSF2	0.23793	0.27471	0.681962	7563	3	-1.2773	891	0.91716	0.96925	1	16869	0
SUPV3L1	0.0039923	0.0029625	0.076495	730	4	-1.2769	892	0.98027	0.99534	1	18217	0
TACR3	0.015837	0.020679	0.26245	1475	3	-1.2765	893	0.56431	0.72376	1	10912	1
FAM72D	0.031767	0.033466	0.287251	2224	4	-1.2761	894	0.96823	0.99105	1	17912	0
TXNRD1	0.0018385	0.001059	0.04106	492	3	-1.276	895	0.72974	0.83999	1	13412	0
SMARCB1	0.0057319	0.0041166	0.091074	861	4	-1.2753	896	0.98573	0.99658	1	18381	0
QRICH1	0.0033452	0.0026662	0.073058	665	4	-1.2751	897	0.99665	0.99929	1	18765	0
ICE2	0.0041084	0.0030516	0.076495	737	3	-1.2719	898	0.87055	0.94232	1	15982	0
BIRC5	0.0096196	0.006868	0.115982	1127	4	-1.2709	899	0.99038	0.9981	1	18505	0
CFDP1	0.020549	0.02392	0.266142	1718	4	-1.2705	900	0.97945	0.99504	1	18204	0
PSMG1	0.0010826	0.00069589	0.033531	393	3	-1.2683	901	0.5547	0.71536	1	10783	1
OR4F17	0.014485	0.019602	0.26245	1400	4	-1.268	902	0.98552	0.99658	1	18371	0
UBE2J1	0.016992	0.021259	0.26245	1544	4	-1.2678	903	0.97343	0.99276	1	18037	0
MRPL17	0.00018073	8.8832e-05	0.008937	186	4	-1.2675	904	0.99078	0.99823	1	18519	0
LENG8	0.050198	0.055587	0.356768	2944	3	-1.2665	905	0.92973	0.97477	1	17133	0
SLC16A3	0.00016584	8.8832e-05	0.008937	178	4	-1.2651	906	0.99879	0.99977	1	18900	0
RPL32	0.010081	0.011075	0.180451	1160	4	-1.2644	907	0.98992	0.99805	1	18491	0
SMU1	0.018288	0.022646	0.264604	1612	4	-1.2641	908	0.98171	0.99556	1	18270	0
CWC22	0.020436	0.023862	0.265961	1715	3	-1.2631	909	0.5236	0.6914	1	10371	1
DBP	0.01437	0.019519	0.26245	1390	4	-1.2629	910	0.98563	0.99658	1	18378	0
HELQ	0.010574	0.014803	0.23662	1186	4	-1.262	911	0.97856	0.99482	1	18177	0
CRIP3	0.010597	0.014803	0.23662	1191	4	-1.2603	912	0.9894	0.99793	1	18471	0
CTDSPL2	0.0041759	0.0030516	0.076495	744	3	-1.2581	913	0.69916	0.81071	1	12841	1
PLA2G1B	0.031976	0.033893	0.288144	2231	4	-1.2578	914	0.96486	0.98974	1	17845	0
TSFM	0.01385	0.018884	0.26245	1361	3	-1.2577	915	0.82928	0.92156	1	15252	0
DDX5	0.0090875	0.0062402	0.108636	1097	4	-1.2573	916	0.99091	0.9983	1	18530	0
CEP350	0.0030905	0.002602	0.073058	628	4	-1.2559	917	0.99691	0.99936	1	18783	0
ANKRD49	0.015167	0.020194	0.26245	1437	3	-1.2557	918	0.91417	0.96867	1	16814	0
MIS18BP1	0.023212	0.026855	0.27975	1832	4	-1.2554	919	0.97679	0.99425	1	18132	0
TUBG1	0.039804	0.043862	0.33008	2538	3	-1.2553	920	0.90553	0.96361	1	16622	0
MCM3AP	0.0017845	0.0010341	0.04059	486	4	-1.2545	921	0.99822	0.99964	1	18863	0
CBX3	0.043947	0.047357	0.332284	2705	3	-1.2541	922	0.71148	0.82537	1	13092	1
AUNIP	0.042608	0.04705	0.332284	2650	3	-1.2538	923	0.0018843	0.012687	1	193	1
DAP3	0.0015099	0.00091033	0.037932	447	3	-1.2529	924	0.86971	0.94232	1	15961	0
TCP1	0.063596	0.067665	0.38935	3309	3	-1.2523	925	0.91091	0.96557	1	16735	0
CHD4	0.0028888	0.0023291	0.072864	603	3	-1.252	926	0.85039	0.93382	1	15615	0
UFM1	0.0026435	0.0018893	0.062051	581	4	-1.2518	927	0.99173	0.99836	1	18562	0
MMGT1	0.0012022	0.00072801	0.03358	411	4	-1.2516	928	0.99872	0.99974	1	18895	0
AAED1	0.0031005	0.002602	0.073058	629	3	-1.2515	929	0.3454	0.60203	1	8527	1
SEC16A	0.099606	0.1179	0.525599	4180	3	-1.251	930	0.94396	0.9818	1	17433	0
ACTR3	0.011924	0.015768	0.238072	1264	4	-1.2504	931	0.98093	0.99548	1	18246	0
UBR4	0.0036219	0.0027123	0.073058	705	4	-1.2499	932	0.96293	0.98897	1	17803	0
LTV1	0.01446	0.019602	0.26245	1398	4	-1.2499	933	0.98554	0.99658	1	18372	0
PYY	0.019209	0.023112	0.264604	1655	3	-1.2494	934	0.71052	0.8233	1	13076	1
POLR2C	0.021584	0.025859	0.276679	1767	4	-1.2492	935	0.97842	0.99474	1	18173	0
POLR1A	0.044386	0.047821	0.332284	2724	3	-1.2491	936	0.89594	0.95909	1	16428	0
MTG1	0.0022392	0.0015024	0.052887	543	4	-1.2483	937	0.97932	0.99497	1	18201	0
INPP5K	1.4951e-07	2.5898e-07	0.000183	12	4	-1.2479	938	1	1	1	19105	0
KIAA1524	0.00028528	0.00012405	0.010045	226	4	-1.2474	939	0.99971	0.99996	1	18995	0
PFDN1	0.0076543	0.0055052	0.104208	988	3	-1.2466	940	0.94449	0.982	1	17440	0
PPIAL4D	0.13306	0.15546	0.580683	4994	2	-1.2462	941	0.49342	0.67164	1	10021	1
ATP5B	0.09349	0.11007	0.52092	4033	3	-1.246	942	0.64775	0.77209	1	12018	1
MRGBP	0.0021596	0.0014262	0.051149	533	4	-1.2457	943	0.99784	0.99959	1	18832	0
HACD2	0.055837	0.0612	0.367648	3131	3	-1.2435	944	0.84862	0.93278	1	15578	0
PSMC3	0.023113	0.026783	0.279615	1829	4	-1.2427	945	0.97689	0.99433	1	18135	0
MBTPS1	0.0033262	0.0026564	0.073058	661	4	-1.242	946	0.98587	0.99663	1	18384	0
RAB2B	0.013355	0.018104	0.259224	1334	3	-1.2415	947	0.5382	0.70606	1	10559	1
MRPS18A	0.001685	0.00099476	0.040201	473	3	-1.2412	948	0.94617	0.98238	1	17464	0
KIF2A	0.0021666	0.0014356	0.051387	534	4	-1.2411	949	0.99783	0.99958	1	18831	0
XPNPEP1	0.1185	0.13756	0.567314	4633	3	-1.241	950	0.93379	0.97707	1	17224	0
TXN2	0.013928	0.019192	0.26245	1371	4	-1.2391	951	0.98607	0.99674	1	18389	0
COPS2	0.04086	0.045018	0.33008	2586	4	-1.2386	952	0.95914	0.98754	1	17730	0
POT1	9.4415e-07	2.5898e-07	0.000183	22	4	-1.2384	953	1	1	1	19097	0
CDKN2A	0.0002554	0.00010851	0.009607	213	4	-1.2361	954	0.9977	0.99954	1	18823	0
ITPKC	0.0030528	0.0024249	0.073058	621	3	-1.2358	955	0.7859	0.88971	1	14462	0
MTERF4	0.017147	0.021352	0.262478	1554	4	-1.2357	956	0.96846	0.99105	1	17920	0
EXOC4	0.003761	0.0027289	0.073058	714	4	-1.2333	957	0.99624	0.99923	1	18737	0
FECH	0.0030541	0.0024249	0.073058	622	3	-1.2331	958	0.7361	0.84787	1	13516	0
USP17L19	0.048023	0.051251	0.341351	2852	3	-1.2326	959	0.50021	0.67789	1	10086	1
SLC22A15	0.082498	0.095716	0.487638	3749	3	-1.2324	960	0.0064165	0.039106	1	481	1
OTUD7A	0.068973	0.071435	0.397751	3428	3	-1.2316	961	0.44728	0.65403	1	9514	1
GOSR2	0.0019068	0.0011652	0.043949	500	4	-1.2306	962	0.99809	0.99961	1	18851	0
GTPBP8	0.0015657	0.00091085	0.037932	458	4	-1.2295	963	0.99843	0.99969	1	18878	0
BAGE2	0.003469	0.0027118	0.073058	679	4	-1.2289	964	0.99653	0.99925	1	18754	0
PEA15	0.015915	0.020679	0.26245	1482	3	-1.2288	965	0.93319	0.97681	1	17208	0
PIGY	0.035756	0.036329	0.292019	2375	4	-1.2279	966	0.96424	0.98949	1	17829	0
HDAC3	0.003189	0.0026559	0.073058	640	4	-1.2271	967	0.98017	0.99534	1	18216	0
SET	0.0034491	0.0027118	0.073058	676	4	-1.2269	968	0.99655	0.99925	1	18757	0
RPL24	0.039811	0.043862	0.33008	2539	4	-1.2268	969	0.96019	0.988	1	17744	0
PDCD11	0.060441	0.063239	0.372058	3233	3	-1.2259	970	0.78961	0.89121	1	14531	0
RPL28	0.072315	0.083896	0.452947	3509	3	-1.2258	971	0.94373	0.98159	1	17429	0
CDCA5	0.13066	0.15387	0.580683	4939	3	-1.2253	972	0.94613	0.98238	1	17462	0
ARF4	0.0045729	0.0031205	0.07678	773	4	-1.2241	973	0.99128	0.99836	1	18546	0
CSNK2A1	8.3806e-05	5.3092e-05	0.007535	129	3	-1.2231	974	0.94048	0.97992	1	17361	0
TERF1	0.038293	0.039266	0.301329	2487	3	-1.223	975	0.072905	0.24432	1	3074	1
CEP41	0.072801	0.084351	0.452947	3522	3	-1.2227	976	0.8893	0.95245	1	16315	0
ISCA2	0.070218	0.076081	0.419467	3459	3	-1.2224	977	0.45341	0.65816	1	9580	1
C1D	0.0092129	0.0063646	0.1098	1105	3	-1.2219	978	0.53323	0.69879	1	10484	1
ZRSR2	3.1085e-05	7.5106e-06	0.001772	81	4	-1.2217	979	0.97825	0.99474	1	18170	0
HIST1H2AG	0.0054598	0.003912	0.087573	840	3	-1.2214	980	0.72126	0.83273	1	13261	0
PIGW	0.00041224	0.00019605	0.014142	265	4	-1.2213	981	0.99959	0.99992	1	18973	0
FOXP1	0.011971	0.015805	0.238072	1266	3	-1.2205	982	0.29705	0.57982	1	8052	1
ASUN	0.00022164	9.8673e-05	0.009246	204	3	-1.2203	983	0.36009	0.60511	1	8661	1
DDOST	0.0030704	0.0024249	0.073058	624	3	-1.2189	984	0.55678	0.71641	1	10810	1
HYPK	0.013996	0.01924	0.26245	1372	4	-1.2189	985	0.986	0.99669	1	18388	0
SLC3A2	0.02215	0.025996	0.276679	1796	3	-1.2172	986	0.71249	0.82642	1	13109	1
PTK2	0.0064871	0.0049308	0.10256	918	4	-1.2161	987	0.97531	0.99371	1	18091	0
PCNA	0.1221	0.14904	0.580683	4729	3	-1.216	988	0.89194	0.9545	1	16361	0
TRAPPC3	0.072349	0.083896	0.452947	3511	2	-1.2156	989	0.24145	0.50219	1	6864	1
WDR92	0.0075545	0.0054307	0.104208	980	3	-1.2153	990	0.58627	0.7374	1	11216	1
SHQ1	0.016633	0.02111	0.26245	1521	4	-1.2152	991	0.97795	0.99458	1	18160	0
DOCK5	2.1463e-05	4.9207e-06	0.001271	69	3	-1.2151	992	0.15396	0.37757	1	4888	1
SPTLC1	0.0027989	0.0023166	0.072864	593	3	-1.2151	993	0.86451	0.94137	1	15869	0
RPL35	0.014274	0.019423	0.26245	1386	4	-1.2146	994	0.98573	0.99658	1	18380	0
MRPL45	0.012171	0.016171	0.239075	1279	3	-1.2143	995	0.31472	0.58958	1	8252	1
UBE2D3	0.062127	0.067255	0.38935	3275	3	-1.214	996	0.68888	0.80449	1	12682	1
TLR1	0.03836	0.039267	0.301329	2489	4	-1.2138	997	0.95198	0.98517	1	17591	0
MORN1	0.14129	0.15927	0.580683	5201	3	-1.2135	998	0.48313	0.67059	1	9898	1
MED8	0.0025526	0.0018214	0.060869	570	4	-1.2125	999	0.97488	0.99344	1	18074	0
WDHD1	0.05349	0.060312	0.367648	3065	3	-1.2124	1000	0.74224	0.85357	1	13637	0
SF3B1	0.00091456	0.00054413	0.028111	368	4	-1.2118	1001	0.99909	0.99982	1	18925	0
GOLGA8N	0.046507	0.050248	0.341351	2806	3	-1.2105	1002	0.71793	0.82961	1	13207	1
C17orf53	0.076509	0.08669	0.458899	3605	3	-1.2088	1003	0.85528	0.93689	1	15706	0
HEATR6	0.015078	0.019907	0.26245	1432	4	-1.2087	1004	0.98492	0.99646	1	18351	0
RREB1	0.022655	0.026397	0.277705	1811	3	-1.208	1005	0.81168	0.90833	1	14941	0
CCDC86	0.058551	0.062051	0.36934	3199	3	-1.2078	1006	0.67011	0.79196	1	12381	1
TAZ	0.0029065	0.0023291	0.072864	605	4	-1.2076	1007	0.99709	0.99939	1	18793	0
WRB	0.0067797	0.0051453	0.104208	937	3	-1.2074	1008	0.58314	0.7342	1	11170	1
KIF4A	0.003451	0.0027118	0.073058	677	4	-1.2073	1009	0.99655	0.99925	1	18756	0
TTC30A	0.016493	0.021047	0.26245	1516	4	-1.2072	1010	0.96279	0.98897	1	17798	0
LARS2	0.00017763	8.8832e-05	0.008937	184	4	-1.2071	1011	0.99982	0.99998	1	19013	0
USP17L26	0.04921	0.054651	0.356768	2903	4	-1.2065	1012	0.95079	0.985	1	17566	0
C1QBP	0.0062495	0.0048868	0.10256	901	4	-1.2056	1013	0.98871	0.99783	1	18452	0
ALG3	0.011477	0.015509	0.238072	1240	4	-1.2049	1014	0.97532	0.99371	1	18092	0
TMEM242	0.0022101	0.0014666	0.051838	539	3	-1.2047	1015	0.64348	0.77	1	11960	1
HARS	0.05337	0.060312	0.367648	3058	3	-1.2047	1016	0.84799	0.93224	1	15563	0
RER1	0.00020043	9.5565e-05	0.009096	195	4	-1.2022	1017	0.98287	0.99594	1	18300	0
PPP2R2A	0.00079709	0.00045296	0.024503	341	4	-1.202	1018	0.99724	0.99942	1	18799	0
ESF1	0.080301	0.094271	0.48402	3693	3	-1.2016	1019	0.9264	0.97373	1	17052	0
KTI12	0.077042	0.089626	0.472608	3616	3	-1.2008	1020	0.94452	0.982	1	17441	0
GAGE2A	0.013858	0.018884	0.26245	1363	3	-1.2005	1021	0.58472	0.7342	1	11195	1
UQCR10	0.0011687	0.0007192	0.033531	408	3	-1.2004	1022	0.77035	0.87259	1	14166	0
MAP1LC3A	0.1084	0.12148	0.527271	4389	3	-1.2002	1023	0.89771	0.95943	1	16464	0
SEC63	0.0003103	0.00012664	0.010045	238	4	-1.1998	1024	0.9908	0.99823	1	18521	0
DHX36	0.01155	0.015577	0.238072	1244	3	-1.1996	1025	0.76044	0.86283	1	13979	0
GNB2	0.0011556	0.00071868	0.033531	406	3	-1.1995	1026	0.66324	0.78354	1	12260	1
FEN1	0.023985	0.028149	0.284674	1874	2	-1.1995	1027	0.85755	0.93787	1	15745	0
MORF4L1	0.00031417	0.00012923	0.010123	244	3	-1.1988	1028	0.9348	0.97749	1	17244	0
TUBB4B	0.013829	0.01884	0.26245	1357	4	-1.1976	1029	0.98617	0.9968	1	18394	0
PDE12	0.0036457	0.0027123	0.073058	707	4	-1.1967	1030	0.99591	0.99915	1	18723	0
NAA15	0.01373	0.018751	0.26245	1352	3	-1.1967	1031	0.9002	0.96018	1	16514	0
ATRX	0.086259	0.10331	0.506463	3848	3	-1.1967	1032	0.78309	0.88501	1	14415	0
SSB	4.0602e-05	2.2014e-05	0.004429	95	4	-1.1964	1033	0.99996	0.99999	1	19058	0
NDUFAF3	0.10709	0.12008	0.525599	4367	3	-1.1956	1034	0.41445	0.62895	1	9201	1
CHEK1	0.059385	0.062256	0.36934	3218	3	-1.1953	1035	0.80648	0.90501	1	14838	0
SETD5	0.0032419	0.0026559	0.073058	648	4	-1.1948	1036	0.99663	0.99929	1	18763	0
DPM1	0.0005788	0.00029965	0.019189	297	3	-1.1935	1037	0.85004	0.93382	1	15608	0
RPL36A-HNRNPH2	0.11096	0.12531	0.532862	4462	2	-1.1925	1038	0.32609	0.59267	1	8350	1
CAMTA1	0.13956	0.15855	0.580683	5160	2	-1.1919	1039	0.79889	0.89796	1	14718	0
ATG9A	0.0011469	0.00071868	0.033531	403	3	-1.1918	1040	0.83486	0.92675	1	15355	0
MZT1	0.058639	0.062051	0.36934	3203	3	-1.1918	1041	0.80814	0.90568	1	14873	0
SNRPD1	0.13739	0.15746	0.580683	5108	3	-1.1916	1042	0.87688	0.94685	1	16090	0
TFDP1	0.18206	0.20958	0.644272	6196	3	-1.1915	1043	0.732	0.84592	1	13449	0
CPSF6	0.001053	0.00065963	0.032519	387	4	-1.1912	1044	0.99895	0.99979	1	18915	0
PCYT2	3.7838e-05	1.6834e-05	0.003657	88	4	-1.1875	1045	0.99996	0.99999	1	19063	0
SRP72	0.0071057	0.0053307	0.104208	956	4	-1.1874	1046	0.97668	0.99416	1	18128	0
TIMM13	0.0010557	0.00066637	0.032519	389	4	-1.1872	1047	0.99894	0.99979	1	18913	0
ALG1	0.00027785	0.00012354	0.010045	223	4	-1.1865	1048	0.95642	0.98695	1	17667	0
APEX1	0.00045137	0.00023024	0.016062	274	4	-1.1857	1049	0.99955	0.99992	1	18969	0
SURF2	0.033509	0.035016	0.292019	2285	3	-1.1856	1050	0.89954	0.96018	1	16504	0
COA6	0.010795	0.015132	0.237928	1203	3	-1.1851	1051	0.89587	0.95909	1	16427	0
URB1	0.051386	0.056046	0.357104	2998	3	-1.1846	1052	0.75608	0.86192	1	13906	0
UQCRB	0.012792	0.017455	0.254617	1307	4	-1.1844	1053	0.98721	0.99725	1	18411	0
APEX2	6.9693e-05	4.9466e-05	0.007535	119	4	-1.1839	1054	0.99965	0.99995	1	18979	0
XRCC1	6.0068e-05	4.6358e-05	0.007535	110	4	-1.1833	1055	0.97137	0.99205	1	17990	0
DHX15	0.016718	0.02111	0.26245	1526	3	-1.1831	1056	0.93128	0.97556	1	17165	0
NUP214	0.019613	0.023509	0.264604	1682	4	-1.1824	1057	0.98039	0.99541	1	18222	0
PSMA7	0.22331	0.25579	0.677966	7211	3	-1.1823	1058	0.51551	0.6893	1	10268	1
MRPL21	0.00082034	0.00045711	0.024503	344	4	-1.1818	1059	0.99907	0.99982	1	18923	0
DDX17	0.0026044	0.0018717	0.062051	576	4	-1.1812	1060	0.9974	0.9995	1	18805	0
GMPS	0.0034757	0.0027118	0.073058	680	3	-1.1803	1061	0.94255	0.98077	1	17403	0
C17orf50	0.031845	0.033893	0.288144	2227	3	-1.18	1062	0.54556	0.70909	1	10668	1
FXN	0.030764	0.033113	0.287251	2177	3	-1.1799	1063	0.93946	0.97948	1	17343	0
KRBOX1	0.015153	0.020194	0.26245	1436	3	-1.1792	1064	0.93606	0.97772	1	17270	0
SEC61G	0.07303	0.084351	0.452947	3527	3	-1.1788	1065	0.60488	0.7469	1	11448	1
PPP2R5C	0.05889	0.062052	0.36934	3209	3	-1.1766	1066	0.89237	0.9545	1	16370	0
CENPL	0.018969	0.023111	0.264604	1646	4	-1.1764	1067	0.98103	0.99548	1	18252	0
PCBP2	0.0018175	0.0010585	0.04106	488	4	-1.1753	1068	0.99818	0.99964	1	18859	0
DPH5	0.010506	0.014802	0.23662	1182	3	-1.1752	1069	0.49815	0.67371	1	10065	1
NDUFA9	0.011671	0.015577	0.238072	1249	3	-1.1751	1070	0.9463	0.98238	1	17469	0
ACD	8.4962e-06	2.3309e-06	0.000874	44	3	-1.1738	1071	0.83223	0.92386	1	15313	0
RFWD2	0.033982	0.035365	0.292019	2305	3	-1.1738	1072	0.92917	0.9745	1	17118	0
DARS2	0.021785	0.025859	0.276679	1774	3	-1.1736	1073	0.74875	0.85823	1	13763	0
FAM50A	0.01458	0.01971	0.26245	1403	4	-1.1727	1074	0.98469	0.99646	1	18344	0
PPAN-P2RY11	0.078361	0.093813	0.48402	3656	3	-1.1727	1075	0.94253	0.98077	1	17402	0
OR5H6	0.089751	0.10805	0.520833	3945	3	-1.1708	1076	0.4122	0.62895	1	9174	1
NSMCE4A	0.028051	0.030822	0.284895	2059	4	-1.1703	1077	0.97195	0.99226	1	18003	0
RAPGEF6	0.050047	0.055587	0.356768	2939	3	-1.1699	1078	0.91185	0.96716	1	16755	0
RANGAP1	0.03785	0.038187	0.295525	2467	2	-1.1694	1079	0.023674	0.11341	1	1235	2
NDUFA10	0.0084966	0.0060745	0.1085	1062	4	-1.1688	1080	0.95245	0.98567	1	17594	0
OCRL	0.0073023	0.0053607	0.104208	968	4	-1.1686	1081	0.9927	0.99858	1	18598	0
FOXRED1	0.00028122	0.00012354	0.010045	225	4	-1.1682	1082	0.99972	0.99996	1	18996	0
HNRNPA1	0.044871	0.047822	0.332284	2741	3	-1.1677	1083	0.43125	0.64046	1	9361	1
PRELID1	0.013118	0.017731	0.256777	1318	4	-1.1675	1084	0.96248	0.98897	1	17788	0
NOL8	0.017488	0.022094	0.264604	1566	3	-1.1663	1085	0.85605	0.93738	1	15719	0
POP5	0.070516	0.07653	0.42146	3468	3	-1.1625	1086	0.90845	0.96493	1	16679	0
NHP2L1	0.0038429	0.0029159	0.076495	720	4	-1.1623	1087	0.99616	0.99921	1	18730	0
CDC26	0.031507	0.033313	0.287251	2210	3	-1.1611	1088	0.90075	0.96086	1	16522	0
LOC389895	0.022391	0.026162	0.276912	1802	3	-1.1605	1089	0.93663	0.97772	1	17283	0
PHF12	0.025476	0.029634	0.284674	1943	3	-1.1599	1090	0.53938	0.70606	1	10575	1
TEX10	0.079323	0.093814	0.48402	3672	3	-1.1599	1091	0.25052	0.51458	1	7054	1
GOLGA6L4	0.010235	0.011076	0.180451	1165	3	-1.1588	1092	0.81592	0.91288	1	15020	0
NXT1	0.00011054	6.3969e-05	0.008433	145	4	-1.1585	1093	0.99989	0.99998	1	19033	0
SLX1B	0.002103	0.0013734	0.04991	526	4	-1.1576	1094	0.9979	0.99959	1	18837	0
RPEL1	0.028235	0.031324	0.286696	2069	3	-1.1576	1095	0.50583	0.68205	1	10149	1
RRP1	0.027388	0.030364	0.284895	2032	4	-1.1575	1096	0.97261	0.99266	1	18019	0
STAG1	0.016703	0.02111	0.26245	1523	3	-1.1569	1097	0.77136	0.87428	1	14183	0
PYROXD1	0.00017455	8.8832e-05	0.008937	179	4	-1.1562	1098	0.99983	0.99998	1	19016	0
MYO5A	0.094251	0.11086	0.52092	4050	3	-1.1554	1099	0.31059	0.58851	1	8217	1
EIF3E	0.0035925	0.0027123	0.073058	701	4	-1.1552	1100	0.9848	0.99646	1	18348	0
MFAP1	0.055618	0.0612	0.367648	3125	3	-1.1552	1101	0.94705	0.9828	1	17483	0
TBL3	0.031301	0.033312	0.287251	2201	4	-1.1549	1102	0.9687	0.99105	1	17927	0
SYMPK	0.12789	0.15233	0.580683	4873	3	-1.1547	1103	0.65713	0.7804	1	12178	1
FOXD4L6	0.069782	0.075189	0.415989	3446	3	-1.154	1104	0.61017	0.74899	1	11524	1
WDR76	0.0083862	0.0057679	0.104208	1052	3	-1.1537	1105	0.88026	0.94907	1	16156	0
NDUFB4	0.00078505	0.00043691	0.024503	340	4	-1.153	1106	0.97477	0.99334	1	18069	0
NDUFB8	0.037424	0.038187	0.295525	2443	4	-1.1528	1107	0.95638	0.98695	1	17666	0
MLST8	0.04642	0.049941	0.340692	2801	3	-1.1516	1108	0.84408	0.93061	1	15502	0
TRMT5	0.00051456	0.00025924	0.017181	284	3	-1.1515	1109	0.92834	0.97399	1	17103	0
KIF20A	0.071962	0.083697	0.452947	3502	3	-1.1508	1110	0.23914	0.50112	1	6812	1
GFER	0.014153	0.01929	0.26245	1380	4	-1.1507	1111	0.98057	0.99548	1	18233	0
ERICH1	0.00026158	0.00010955	0.009607	215	3	-1.1501	1112	0.15801	0.38768	1	4978	1
NPAT	0.03332	0.034909	0.292019	2279	3	-1.1501	1113	0.93015	0.97529	1	17143	0
C11orf74	0.036359	0.03677	0.292252	2396	3	-1.15	1114	0.84206	0.92953	1	15470	0
PMPCB	0.00068387	0.00041981	0.024274	323	4	-1.1496	1115	0.99402	0.99885	1	18639	0
RNGTT	0.016228	0.021002	0.26245	1497	3	-1.1481	1116	0.71919	0.83169	1	13228	1
MRPL28	0.025163	0.029388	0.284674	1927	4	-1.1476	1117	0.97484	0.99334	1	18072	0
SEPSECS	0.01036	0.011111	0.180451	1176	3	-1.1471	1118	0.26498	0.54075	1	7381	1
TRIM34	0.012369	0.016172	0.239075	1290	2	-1.1461	1119	0.39622	0.62377	1	9004	1
CCNH	0.013908	0.019191	0.26245	1370	4	-1.1458	1120	0.98609	0.99674	1	18390	0
SON	0.019686	0.023509	0.264604	1685	3	-1.1457	1121	0.80669	0.90501	1	14845	0
CREB3	0.009042	0.0062211	0.1085	1095	4	-1.1454	1122	0.99096	0.99832	1	18532	0
MYBPH	0.0016002	0.00098751	0.040098	462	3	-1.1451	1123	0.4238	0.63621	1	9290	1
FOXM1	0.0010914	0.00069589	0.033531	394	4	-1.145	1124	0.99644	0.99924	1	18747	0
EIF4E2	0.032329	0.034022	0.288144	2244	4	-1.1439	1125	0.9596	0.98771	1	17738	0
UTP18	0.00059264	0.0003271	0.020136	303	4	-1.1436	1126	0.99941	0.99989	1	18955	0
PPIL1	4.1242e-05	2.2532e-05	0.004486	96	3	-1.1432	1127	0.77772	0.88099	1	14309	0
NEK2	0.00015792	8.8314e-05	0.008937	170	4	-1.1425	1128	0.99984	0.99998	1	19022	0
SLC25A1	0.10379	0.11897	0.525599	4286	3	-1.1424	1129	0.36116	0.60511	1	8670	1
EIF2B5	0.019829	0.02357	0.264604	1691	4	-1.1419	1130	0.98017	0.99534	1	18215	0
SHBG	0.030385	0.032986	0.287251	2163	3	-1.1419	1131	0.68659	0.80342	1	12643	1
SIN3A	0.0031636	0.0026196	0.073058	636	4	-1.1417	1132	0.99684	0.99935	1	18778	0
GINS1	0.010527	0.014802	0.23662	1184	3	-1.1382	1133	0.7	0.81176	1	12858	1
GAPDH	0.024228	0.028234	0.284674	1883	4	-1.1373	1134	0.94933	0.98393	1	17534	0
SPATA5	0.016348	0.021002	0.26245	1507	2	-1.1365	1135	0.0292	0.13128	1	1454	1
SYN2	0.037423	0.038187	0.295525	2442	3	-1.136	1136	0.87322	0.94414	1	16028	0
PFKL	0.089741	0.10805	0.520833	3944	3	-1.1348	1137	0.49394	0.67164	1	10024	1
TUFM	0.010086	0.011075	0.180451	1161	4	-1.1345	1138	0.98991	0.99805	1	18490	0
PFDN6	0.068507	0.071435	0.397751	3418	3	-1.1337	1139	0.92606	0.97348	1	17045	0
DPAGT1	0.0085525	0.0061242	0.1085	1068	3	-1.1335	1140	0.78132	0.88261	1	14381	0
TUBGCP3	0.013902	0.019191	0.26245	1369	3	-1.1332	1141	0.099557	0.29478	1	3686	1
KRTAP4-9	0.0036191	0.0027123	0.073058	704	4	-1.1327	1142	0.99638	0.99924	1	18743	0
RUVBL1	0.08649	0.10331	0.506463	3857	2	-1.1325	1143	0.56594	0.7248	1	10935	1
SLC52A3	0.015912	0.020679	0.26245	1480	3	-1.1315	1144	0.8966	0.95943	1	16442	0
SFSWAP	8.5913e-05	5.361e-05	0.007535	133	4	-1.1305	1145	0.99665	0.99929	1	18764	0
MSL1	0.007013	0.0053027	0.104208	949	3	-1.129	1146	0.78099	0.88261	1	14375	0
UBA5	0.022064	0.025996	0.276679	1790	3	-1.1284	1147	0.73841	0.84884	1	13563	0
PSMB6	0.03662	0.037167	0.294426	2405	3	-1.1283	1148	0.93072	0.97556	1	17158	0
CHD2	0.010474	0.014802	0.23662	1181	4	-1.1274	1149	0.98953	0.99793	1	18477	0
RRP12	0.0074919	0.0054084	0.104208	977	4	-1.1268	1150	0.99251	0.99858	1	18591	0
SERPINB6	0.00044715	0.00023024	0.016062	273	4	-1.1259	1151	0.99955	0.99992	1	18970	0
CCDC93	0.00016383	8.8832e-05	0.008937	176	4	-1.1257	1152	0.9815	0.99556	1	18266	0
RPP25L	0.0085227	0.006075	0.1085	1065	3	-1.1256	1153	0.3321	0.59684	1	8411	1
DDX41	0.00067372	0.00039236	0.023292	322	4	-1.1253	1154	0.98356	0.99623	1	18313	0
GSR	0.056593	0.061201	0.367648	3154	3	-1.1253	1155	0.20299	0.45211	1	6014	1
DDX3X	0.015029	0.019907	0.26245	1429	4	-1.1249	1156	0.98497	0.99646	1	18354	0
RPS2	0.1342	0.15546	0.580683	5017	3	-1.1242	1157	0.43701	0.64148	1	9417	1
RNF103-CHMP3	0.014294	0.019423	0.26245	1387	2	-1.124	1158	0.8754	0.94504	1	16066	0
NEDD1	0.03803	0.03879	0.298984	2476	4	-1.1223	1159	0.96197	0.98897	1	17777	0
FBL	0.020907	0.024611	0.270058	1738	2	-1.1219	1160	0.68592	0.80342	1	12629	1
ACTR10	0.0065499	0.0050168	0.103671	925	4	-1.1217	1161	0.99345	0.99872	1	18623	0
RPS25	0.14588	0.1653	0.583247	5313	3	-1.121	1162	0.78821	0.89048	1	14506	0
SERPINI2	3.8891e-05	1.9424e-05	0.004036	90	3	-1.1199	1163	0.25193	0.51685	1	7089	1
SS18L2	0.067575	0.071013	0.397751	3401	2	-1.1196	1164	0.57136	0.7279	1	11007	1
SETDB2	0.018982	0.023111	0.264604	1648	3	-1.1194	1165	0.6999	0.81176	1	12855	1
SRP9	0.00059119	0.0003271	0.020136	301	3	-1.1189	1166	0.6637	0.78354	1	12270	1
AGAP9	0.03119	0.033312	0.287251	2195	4	-1.1174	1167	0.96881	0.99105	1	17929	0
HAGHL	0.11924	0.14168	0.580024	4653	2	-1.1169	1168	0.57586	0.73003	1	11069	1
CHCHD4	0.00058784	0.00032347	0.020136	300	4	-1.1164	1169	0.99086	0.99824	1	18526	0
SMIM10L1	0.075117	0.085258	0.455862	3575	3	-1.1164	1170	0.28543	0.56186	1	7816	1
LSM10	0.016893	0.021208	0.26245	1539	3	-1.1163	1171	0.91212	0.96747	1	16763	0
HIST1H2BL	0.19412	0.22423	0.654291	6501	3	-1.1162	1172	0.34687	0.60203	1	8537	1
CBX6	0.03212	0.034022	0.288144	2237	3	-1.1159	1173	0.15692	0.38262	1	4954	1
MRPS18B	0.0013252	0.00076012	0.03358	427	4	-1.1153	1174	0.99867	0.99973	1	18893	0
NOL9	0.015378	0.020195	0.26245	1449	3	-1.1143	1175	0.94574	0.98218	1	17456	0
MYOM2	0.013308	0.018104	0.259224	1333	3	-1.1132	1176	0.71034	0.8233	1	13072	1
ETV1	0.022636	0.026397	0.277705	1810	3	-1.1127	1177	0.78735	0.89048	1	14492	0
USP53	0.051263	0.055881	0.356768	2991	4	-1.1119	1178	0.94874	0.98375	1	17517	0
NPM1	0.017024	0.021308	0.26245	1545	4	-1.111	1179	0.97756	0.99451	1	18153	0
ATP5H	0.04021	0.044283	0.33008	2557	3	-1.1105	1180	0.91218	0.96747	1	16765	0
CPSF1	0.02952	0.03231	0.287251	2126	4	-1.11	1181	0.97048	0.99174	1	17965	0
SCO2	0.0020117	0.0013682	0.04991	515	4	-1.1099	1182	0.99799	0.9996	1	18845	0
USP9X	0.018166	0.022645	0.264604	1603	4	-1.1098	1183	0.98183	0.99556	1	18272	0
MALSU1	0.012229	0.016171	0.239075	1281	4	-1.1097	1184	0.98777	0.99744	1	18425	0
MRPL42	0.0018799	0.0011574	0.043949	497	4	-1.1087	1185	0.99812	0.99961	1	18855	0
VPS37A	0.0061058	0.0047511	0.101699	893	3	-1.1085	1186	0.76631	0.86906	1	14082	0
UBA6	0.020038	0.023629	0.264604	1700	4	-1.1085	1187	0.97262	0.99266	1	18021	0
C17orf70	0.0049681	0.0033909	0.079738	798	4	-1.1084	1188	0.98563	0.99658	1	18377	0
ADSL	0.023427	0.027415	0.281442	1851	3	-1.1082	1189	0.70373	0.81698	1	12932	1
CHP1	0.00013505	8.7796e-05	0.008937	158	4	-1.1081	1190	0.99948	0.99991	1	18963	0
PRDM10	0.024842	0.028778	0.284674	1908	3	-1.1081	1191	0.38915	0.61964	1	8934	1
OR4F4	0.00065459	0.00034833	0.021071	316	4	-1.1077	1192	0.99935	0.99987	1	18948	0
KIF9	0.049348	0.054801	0.356768	2911	3	-1.1076	1193	0.43869	0.64355	1	9439	1
PMPCA	0.0073437	0.0053612	0.104208	969	4	-1.1065	1194	0.99266	0.99858	1	18597	0
RAPH1	0.009307	0.0064314	0.110554	1112	3	-1.1065	1195	0.81905	0.9148	1	15074	0
VAPA	0.063322	0.067665	0.38935	3300	3	-1.1063	1196	0.91039	0.96557	1	16722	0
NBN	0.00049352	0.00025614	0.017181	279	3	-1.106	1197	0.84738	0.93167	1	15551	0
METAP1	0.014856	0.019856	0.26245	1417	4	-1.1059	1198	0.98514	0.99652	1	18358	0
SLC44A5	0.024254	0.028234	0.284674	1884	3	-1.1055	1199	0.4837	0.67059	1	9903	1
FAM162B	0.035106	0.036114	0.292019	2341	4	-1.1049	1200	0.96489	0.98974	1	17847	0
C2orf49	0.0098598	0.010952	0.180451	1146	3	-1.1034	1201	0.92602	0.97348	1	17043	0
RNMTL1	0.018149	0.022645	0.264604	1602	4	-1.1032	1202	0.98185	0.99556	1	18273	0
SARS	0.10189	0.11815	0.525599	4242	3	-1.103	1203	0.74814	0.85823	1	13748	0
MYH9	0.0016126	0.00098751	0.040098	464	4	-1.1029	1204	0.99247	0.99855	1	18588	0
HOXB8	0.0073567	0.0053612	0.104208	971	4	-1.1028	1205	0.99264	0.99858	1	18596	0
EMG1	0.015446	0.020195	0.26245	1454	3	-1.1027	1206	0.76625	0.86906	1	14079	0
PPIL3	0.051915	0.05655	0.357344	3016	3	-1.1025	1207	0.87351	0.94414	1	16033	0
RPS17	0.0078603	0.0055638	0.104208	1009	4	-1.102	1208	0.99214	0.99846	1	18576	0
PSME3	0.062061	0.067255	0.38935	3274	3	-1.1013	1209	0.84671	0.93113	1	15539	0
DDX51	0.067858	0.071434	0.397751	3406	3	-1.1013	1210	0.87567	0.94504	1	16070	0
CAMK2N1	0.0022277	0.0014671	0.051838	540	4	-1.1009	1211	0.99139	0.99836	1	18549	0
PPP1R15B	0.01472	0.01971	0.26245	1411	4	-1.1009	1212	0.98528	0.99657	1	18363	0
ARHGAP1	0.0042759	0.0030521	0.076495	752	4	-1.1002	1213	0.99572	0.99914	1	18715	0
MRPL19	0.038673	0.03941	0.301329	2499	3	-1.1	1214	0.91612	0.96925	1	16842	0
PARS2	0.0010449	0.0006384	0.031696	384	4	-1.0972	1215	0.99896	0.99979	1	18916	0
ROMO1	0.069984	0.075189	0.415989	3455	3	-1.0972	1216	0.67121	0.79196	1	12393	1
GTF2H2	0.075362	0.085744	0.456932	3583	3	-1.097	1217	0.80702	0.90501	1	14849	0
ZNF407	0.028217	0.030822	0.284895	2067	3	-1.0963	1218	0.7731	0.87428	1	14220	0
ESYT3	0.0050544	0.0033914	0.079738	809	4	-1.0959	1219	0.99495	0.99907	1	18676	0
SNAPC3	0.027385	0.030364	0.284895	2031	3	-1.0959	1220	0.74462	0.85639	1	13681	0
ATP6V1F	0.012521	0.016627	0.24504	1297	2	-1.0951	1221	0.04192	0.16954	1	1988	1
ZC3H8	0.00020292	9.6083e-05	0.009096	198	4	-1.0944	1222	0.99978	0.99997	1	19010	0
BICD2	0.012031	0.015885	0.238717	1270	3	-1.0943	1223	0.59461	0.7395	1	11316	1
USP17L29	0.25119	0.28594	0.681962	7911	2	-1.0937	1224	0.92751	0.97399	1	17079	0
FBXW7	0.022146	0.025996	0.276679	1795	3	-1.0928	1225	0.90613	0.96361	1	16635	0
AGTRAP	0.04477	0.047822	0.332284	2736	3	-1.092	1226	0.45679	0.65922	1	9618	1
YEATS2	0.05486	0.060761	0.367648	3098	3	-1.0917	1227	0.83012	0.9233	1	15272	0
PRIM1	0.13634	0.15675	0.580683	5077	3	-1.0916	1228	0.6158	0.75217	1	11612	1
CDK9	0.049288	0.054801	0.356768	2908	4	-1.0913	1229	0.95071	0.98482	1	17564	0
SNAPC4	0.021169	0.025321	0.275544	1747	4	-1.0909	1230	0.95316	0.98582	1	17607	0
BMP7	0.011599	0.015577	0.238072	1246	3	-1.0908	1231	0.1586	0.39024	1	4986	1
PDCL	7.5494e-06	1.8129e-06	0.000845	41	4	-1.0907	1232	0.99999	1	1	19086	0
TARSL2	0.00015062	8.8314e-05	0.008937	166	4	-1.0906	1233	0.99985	0.99998	1	19025	0
WNK1	0.017795	0.022587	0.264604	1581	3	-1.0905	1234	0.4415	0.64564	1	9460	1
RBM14	0.027356	0.030364	0.284895	2028	3	-1.0894	1235	0.89346	0.95604	1	16388	0
PGLS	0.041251	0.045018	0.33008	2593	4	-1.0883	1236	0.95875	0.98754	1	17724	0
CCNF	0.0020461	0.0013729	0.04991	521	4	-1.0875	1237	0.98033	0.99541	1	18219	0
MNAT1	0.0032874	0.0026564	0.073058	652	4	-1.0865	1238	0.96858	0.99105	1	17925	0
HDAC7	0.042695	0.04705	0.332284	2654	4	-1.0861	1239	0.95731	0.98711	1	17696	0
ZC3H7A	0.0017832	0.0010341	0.04059	485	4	-1.0856	1240	0.99822	0.99964	1	18864	0
IFNA10	0.0056725	0.004116	0.091074	860	3	-1.085	1241	0.82442	0.92095	1	15161	0
DHDDS	0.027974	0.030741	0.284895	2056	3	-1.0832	1242	0.92913	0.9745	1	17117	0
ELMO2	6.0281e-05	4.6358e-05	0.007535	111	4	-1.0829	1243	0.9924	0.99855	1	18587	0
PSMA5	0.055528	0.0612	0.367648	3123	3	-1.0817	1244	0.92802	0.97399	1	17096	0
ELOF1	0.013261	0.01801	0.258642	1330	3	-1.0816	1245	0.30266	0.5864	1	8147	1
PSMD7	0.13738	0.15746	0.580683	5107	3	-1.0811	1246	0.92087	0.97071	1	16939	0
NELFA	0.0076701	0.0055052	0.104208	991	2	-1.0802	1247	0.5746	0.72896	1	11054	1
RASA2	0.003281	0.0026564	0.073058	651	3	-1.0791	1248	0.92549	0.97294	1	17032	0
TXN	0.014446	0.019602	0.26245	1397	4	-1.0785	1249	0.98555	0.99658	1	18373	0
RPL27A	0.018289	0.022646	0.264604	1613	3	-1.0785	1250	0.4425	0.64673	1	9471	1
TCOF1	0.032037	0.033893	0.288144	2234	3	-1.0775	1251	0.90253	0.96189	1	16551	0
UBA3	0.0017296	0.0010264	0.04059	479	3	-1.0765	1252	0.64312	0.77	1	11952	1
CPSF3L	0.082906	0.09863	0.500353	3757	3	-1.0765	1253	0.7003	0.81176	1	12865	1
PHC2	0.1389	0.15855	0.580683	5142	3	-1.0761	1254	0.93649	0.97772	1	17281	0
YTHDF2	0.0035736	0.0027123	0.073058	697	4	-1.0755	1255	0.99643	0.99924	1	18745	0
OTUD6A	0.081066	0.094272	0.48402	3714	3	-1.0751	1256	0.39923	0.62483	1	9041	1
FZR1	0.0016931	0.0010051	0.040448	475	3	-1.0742	1257	0.90192	0.96154	1	16542	0
COG7	0.0068365	0.0051458	0.104208	940	4	-1.0742	1258	0.979	0.99489	1	18192	0
TAGAP	0.017702	0.022534	0.264604	1575	2	-1.0742	1259	0.59943	0.74267	1	11381	1
SREBF1	0.067408	0.071013	0.397751	3396	3	-1.0733	1260	0.78182	0.88261	1	14390	0
NOLC1	0.088985	0.1073	0.520833	3923	3	-1.0732	1261	0.93176	0.97606	1	17178	0
C12orf49	0.00026622	0.00011007	0.009607	216	4	-1.0724	1262	0.99938	0.99989	1	18951	0
UCHL3	0.012355	0.016172	0.239075	1289	3	-1.0723	1263	0.90931	0.96524	1	16691	0
TTC31	0.15251	0.16703	0.583247	5462	3	-1.0721	1264	0.90299	0.9619	1	16568	0
CSE1L	0.17808	0.20466	0.639728	6100	2	-1.0716	1265	0.58738	0.7374	1	11231	1
BIN2	0.089705	0.10805	0.520833	3941	3	-1.0711	1266	0.9293	0.9745	1	17121	0
CTAG1B	0.22865	0.26597	0.681962	7354	2	-1.0711	1267	0.68689	0.80342	1	12647	1
VAMP3	0.0028071	0.0023171	0.072864	597	4	-1.0695	1268	0.95785	0.9874	1	17705	0
POU2F1	7.0229e-05	4.9466e-05	0.007535	120	3	-1.0692	1269	0.12917	0.33424	1	4356	1
G6PD	0.00053749	0.00026235	0.017293	290	4	-1.069	1270	0.99631	0.99923	1	18740	0
TRMU	0.0014491	0.00081762	0.035121	444	3	-1.0688	1271	0.67901	0.79824	1	12505	1
TM2D1	0.00017904	8.8832e-05	0.008937	185	3	-1.0685	1272	0.94023	0.97969	1	17358	0
KDELR3	0.013545	0.018237	0.259768	1342	3	-1.0681	1273	0.51726	0.69035	1	10290	1
EIF2B3	0.025295	0.029388	0.284674	1934	3	-1.0681	1274	0.84574	0.93113	1	15529	0
RNPS1	0.00038028	0.00017844	0.013169	259	4	-1.068	1275	0.94964	0.9841	1	17541	0
USP1	0.020347	0.023728	0.265084	1711	4	-1.0673	1276	0.97455	0.99306	1	18065	0
WDR7	4.9803e-05	4.4804e-05	0.007535	104	3	-1.0669	1277	0.24086	0.50219	1	6849	1
LONP1	0.00075478	0.00043225	0.024503	336	3	-1.0665	1278	0.93917	0.97882	1	17337	0
SSSCA1	0.0024114	0.0017764	0.060116	557	4	-1.0656	1279	0.95423	0.98632	1	17630	0
MUS81	0.019219	0.023112	0.264604	1657	4	-1.0654	1280	0.98078	0.99548	1	18242	0
RTTN	0.00087104	0.00045763	0.024503	357	3	-1.0652	1281	0.88397	0.9512	1	16221	0
ISY1-RAB43	0.13831	0.15818	0.580683	5129	3	-1.0652	1282	0.88971	0.95329	1	16322	0
MED7	0.0054473	0.003912	0.087573	839	4	-1.065	1283	0.99455	0.99892	1	18658	0
ZWINT	0.010808	0.015132	0.237928	1205	3	-1.0647	1284	0.75381	0.86009	1	13865	0
PNPT1	0.0080505	0.0056207	0.104208	1025	4	-1.0643	1285	0.99183	0.99839	1	18567	0
MRPL12	0.040783	0.044883	0.33008	2584	4	-1.0641	1286	0.95191	0.98517	1	17589	0
TSSK6	0.041941	0.045576	0.332136	2623	3	-1.0639	1287	0.86438	0.94137	1	15866	0
MTFMT	0.039914	0.043986	0.33008	2541	3	-1.0637	1288	0.33092	0.59684	1	8396	1
OTUB1	0.0098567	0.010952	0.180451	1145	2	-1.0634	1289	0.43536	0.64148	1	9400	1
UQCC1	0.043787	0.047356	0.332284	2700	3	-1.0631	1290	0.13697	0.34809	1	4528	1
CCDC57	0.023335	0.027308	0.281442	1840	4	-1.0601	1291	0.97666	0.99416	1	18126	0
MRPL13	0.058582	0.062051	0.36934	3200	3	-1.0598	1292	0.89699	0.95943	1	16450	0
THAP10	0.24841	0.28477	0.681962	7840	2	-1.059	1293	0.75091	0.85916	1	13808	0
RNPC3	0.00090959	0.00054361	0.028111	367	3	-1.0583	1294	0.51384	0.6893	1	10246	1
SRRM1	0.0054907	0.003912	0.087573	842	3	-1.0582	1295	0.94601	0.98238	1	17461	0
OR1N2	0.019078	0.023111	0.264604	1651	4	-1.058	1296	0.98092	0.99548	1	18245	0
RMND1	0.011123	0.015509	0.238072	1224	4	-1.0573	1297	0.98593	0.99663	1	18386	0
NR2F6	0.078017	0.09083	0.475024	3642	3	-1.057	1298	0.90581	0.96361	1	16626	0
TIGD5	0.09587	0.11165	0.522429	4084	3	-1.057	1299	0.38778	0.61752	1	8922	1
GEMIN6	0.05245	0.059967	0.367648	3038	4	-1.0567	1300	0.94755	0.98319	1	17491	0
DMAP1	0.0063064	0.0049085	0.10256	904	3	-1.0566	1301	0.91187	0.96716	1	16756	0
LYPD6B	0.053843	0.060313	0.367648	3078	3	-1.0561	1302	0.832	0.92386	1	15307	0
VTA1	0.0063241	0.0049303	0.10256	907	4	-1.0555	1303	0.96317	0.98897	1	17806	0
COMMD2	0.044187	0.047821	0.332284	2715	3	-1.0555	1304	0.93243	0.97606	1	17197	0
STARD7	0.00042782	0.00021366	0.015183	268	3	-1.0554	1305	0.93631	0.97772	1	17277	0
TADA1	0.0055205	0.0039125	0.087573	847	4	-1.0553	1306	0.9658	0.99011	1	17863	0
FBXL6	0.00090725	0.00054361	0.028111	365	4	-1.0546	1307	0.99909	0.99982	1	18926	0
ANAPC15	0.011302	0.015509	0.238072	1229	4	-1.0545	1308	0.9565	0.98695	1	17670	0
PCDHGA6	0.039552	0.043739	0.329939	2529	4	-1.0545	1309	0.96045	0.98815	1	17752	0
TOMM22	0.031994	0.033893	0.288144	2233	3	-1.0542	1310	0.91587	0.96896	1	16833	0
HSF2	0.0042854	0.0030521	0.076495	754	3	-1.0541	1311	0.81806	0.91352	1	15062	0
RPS3A	0.0076332	0.0055052	0.104208	985	3	-1.0536	1312	0.93081	0.97556	1	17160	0
TMEM216	0.010111	0.011075	0.180451	1162	3	-1.0536	1313	0.81154	0.90833	1	14938	0
LUC7L2	6.3056e-05	4.7912e-05	0.007535	114	4	-1.0535	1314	0.99994	0.99999	1	19048	0
SSU72	0.043337	0.047179	0.332284	2679	4	-1.0534	1315	0.95298	0.98582	1	17605	0
PPP1R8	0.0025064	0.0018064	0.060685	567	4	-1.053	1316	0.99749	0.99954	1	18809	0
STARD10	0.15815	0.17516	0.593392	5614	3	-1.0526	1317	0.39136	0.61964	1	8955	1
CBWD5	0.29068	0.31281	0.681962	8758	2	-1.0525	1318	0.2278	0.4842	1	6572	1
RPL36AL	0.0023548	0.0016495	0.057016	552	4	-1.0519	1319	0.99765	0.99954	1	18819	0
KAT8	0.10933	0.12203	0.527271	4413	2	-1.0516	1320	0.2593	0.53266	1	7245	1
2022-03-02	0.05384	0.060313	0.367648	3077	3	-1.0512	1321	0.90044	0.96086	1	16518	0
TRIM31	0.0099661	0.011075	0.180451	1153	4	-1.0509	1322	0.99003	0.99805	1	18496	0
IMMT	0.00098274	0.00058712	0.029379	377	3	-1.0505	1323	0.49784	0.67371	1	10062	1
VCPIP1	0.028849	0.031721	0.286696	2095	4	-1.0505	1324	0.97115	0.99194	1	17985	0
FAM83C	0.033907	0.035365	0.292019	2298	4	-1.0501	1325	0.96609	0.99011	1	17868	0
CDK12	0.025998	0.029842	0.284674	1969	3	-1.0488	1326	0.93731	0.97772	1	17298	0
FAM174B	0.020079	0.023629	0.264604	1702	3	-1.0481	1327	0.72404	0.83379	1	13317	0
RMND5A	0.085998	0.10331	0.506463	3837	3	-1.0479	1328	0.29875	0.58302	1	8083	1
FBXO15	0.00063727	0.00033435	0.020354	314	3	-1.0472	1329	0.9252	0.97268	1	17027	0
HDGF	0.050347	0.055588	0.356768	2952	3	-1.0469	1330	0.743	0.85357	1	13652	0
METTL12	0.025452	0.029634	0.284674	1941	4	-1.0466	1331	0.97455	0.99306	1	18064	0
ZNF519	0.057047	0.061201	0.367648	3172	3	-1.045	1332	0.59805	0.74164	1	11367	1
PRDM12	0.034891	0.036114	0.292019	2331	3	-1.0443	1333	0.85043	0.93382	1	15616	0
TRMT10C	0.01785	0.022587	0.264604	1586	3	-1.0442	1334	0.45394	0.65816	1	9585	1
C17orf67	0.074838	0.084571	0.452947	3568	2	-1.0441	1335	0.71733	0.82961	1	13196	1
HIST1H3A	0.084314	0.10208	0.506463	3787	3	-1.0426	1336	0.23758	0.49885	1	6771	1
PSMC3IP	0.06566	0.070794	0.397751	3354	2	-1.0425	1337	0.87186	0.94326	1	16003	0
VPS35	0.046273	0.04994	0.340692	2799	3	-1.042	1338	0.36477	0.60511	1	8704	1
PLK4	0.015109	0.020194	0.26245	1434	4	-1.0418	1339	0.98489	0.99646	1	18350	0
FLCN	0.1512	0.16632	0.583247	5427	3	-1.0418	1340	0.8982	0.95943	1	16478	0
ADM5	0.057786	0.061402	0.368392	3185	3	-1.0416	1341	0.81664	0.91288	1	15035	0
SPN	0.026311	0.029928	0.284674	1982	3	-1.0415	1342	0.71648	0.82856	1	13180	1
LRRC74A	0.0017635	0.0010336	0.04059	481	4	-1.0408	1343	0.99824	0.99964	1	18866	0
CUL4A	0.17868	0.20508	0.639728	6113	3	-1.0403	1344	0.91202	0.96747	1	16762	0
PPIL4	0.020322	0.023728	0.265084	1709	3	-1.04	1345	0.64186	0.77	1	11940	1
MPDU1	0.01763	0.022533	0.264604	1571	3	-1.0395	1346	0.87083	0.94232	1	15987	0
PPAPDC3	0.060574	0.063239	0.372058	3237	2	-1.0392	1347	0.82633	0.92156	1	15198	0
TPRKB	0.0080046	0.0056202	0.104208	1019	4	-1.0389	1348	0.97608	0.99391	1	18108	0
VPREB3	0.005974	0.0037074	0.085342	884	2	-1.0374	1349	0.76349	0.87266	1	14031	0
PLCB1	0.090093	0.10805	0.520833	3953	3	-1.037	1350	0.62124	0.75427	1	11676	1
AHCTF1	0.0144	0.019519	0.26245	1392	3	-1.0366	1351	0.6884	0.80449	1	12671	1
DTL	0.045108	0.048086	0.333881	2752	4	-1.0366	1352	0.95489	0.98648	1	17640	0
GTF2E2	0.0066894	0.0050701	0.103987	931	4	-1.0359	1353	0.96225	0.98897	1	17783	0
WWOX	0.061996	0.067044	0.38935	3273	3	-1.0356	1354	0.2056	0.45408	1	6072	1
TRAF2	0.045862	0.049319	0.338263	2781	3	-1.0345	1355	0.94211	0.98077	1	17393	0
TRIB1	0.011603	0.015577	0.238072	1247	4	-1.0344	1356	0.9884	0.99775	1	18441	0
PREB	0.018281	0.022646	0.264604	1610	4	-1.0342	1357	0.97478	0.99334	1	18070	0
PAK1IP1	0.079634	0.094038	0.48402	3680	2	-1.0334	1358	0.86	0.93939	1	15787	0
CSTB	0.055759	0.0612	0.367648	3128	3	-1.0333	1359	0.87824	0.94685	1	16115	0
FANCM	0.025734	0.029841	0.284674	1959	3	-1.0332	1360	0.62309	0.75855	1	11700	1
HTR6	0.10684	0.12008	0.525599	4361	3	-1.0324	1361	0.4416	0.64564	1	9462	1
HIST1H4I	0.071819	0.083233	0.452947	3498	2	-1.032	1362	0.53652	0.70505	1	10530	1
NAPG	0.11384	0.12814	0.541304	4523	3	-1.0313	1363	0.8309	0.92386	1	15293	0
DAZAP1	0.0042533	0.0030516	0.076495	751	4	-1.0306	1364	0.95439	0.98632	1	17633	0
HNRNPC	0.014628	0.01971	0.26245	1405	4	-1.0303	1365	0.98537	0.99657	1	18368	0
BSG	0.0076209	0.0055052	0.104208	983	3	-1.03	1366	0.14186	0.35586	1	4624	1
B3GNT3	0.096606	0.11379	0.525599	4100	2	-1.0299	1367	0.53689	0.70505	1	10538	1
TMEM191C	0.031585	0.033466	0.287251	2217	4	-1.0296	1368	0.96842	0.99105	1	17919	0
WDR3	0.020641	0.024132	0.267882	1721	4	-1.0293	1369	0.97936	0.99504	1	18203	0
EXOC7	0.01367	0.018379	0.260246	1345	3	-1.0283	1370	0.94558	0.98218	1	17454	0
VPS11	0.00065913	0.0003561	0.021405	317	3	-1.028	1371	0.08939	0.27049	1	3472	1
SCAP	0.02676	0.030008	0.284674	2003	4	-1.028	1372	0.97324	0.99276	1	18031	0
PMF1-BGLAP	0.038951	0.039852	0.303501	2507	3	-1.028	1373	0.90724	0.96361	1	16658	0
DROSHA	0.053999	0.060313	0.367648	3083	3	-1.0279	1374	0.77462	0.87769	1	14247	0
NDUFV1	0.0040902	0.003035	0.076495	736	4	-1.0245	1375	0.99591	0.99915	1	18722	0
IKBKAP	0.018242	0.022646	0.264604	1608	4	-1.0235	1376	0.96081	0.98844	1	17759	0
RCL1	0.025333	0.029466	0.284674	1939	3	-1.0233	1377	0.6281	0.76173	1	11762	1
CCDC144A	0.12977	0.15294	0.580683	4918	3	-1.023	1378	0.73001	0.84098	1	13414	0
ID2	0.055422	0.0612	0.367648	3118	3	-1.0227	1379	0.92776	0.97399	1	17086	0
ARVCF	0.011461	0.015509	0.238072	1238	4	-1.0221	1380	0.98854	0.99783	1	18445	0
PFN1	0.016244	0.021002	0.26245	1498	3	-1.0221	1381	0.89738	0.95943	1	16455	0
CELSR3	0.17232	0.19042	0.6099	5964	3	-1.0219	1382	0.8758	0.94504	1	16075	0
AKAP17A	0.00038598	0.00018673	0.013713	260	4	-1.0215	1383	0.98798	0.99749	1	18428	0
AMN	0.0022578	0.0015169	0.053123	545	4	-1.0215	1384	0.99774	0.99956	1	18826	0
RNF168	0.0040068	0.0029791	0.076495	732	3	-1.0215	1385	0.82476	0.92095	1	15168	0
PDCD2L	0.0021568	0.0014262	0.051149	532	4	-1.0213	1386	0.99784	0.99959	1	18833	0
PAK2	0.04197	0.045736	0.332284	2624	3	-1.021	1387	0.92367	0.97155	1	16990	0
CRCP	0.0041187	0.0030516	0.076495	739	4	-1.0204	1388	0.99588	0.99914	1	18719	0
RBBP7	0.023214	0.026855	0.27975	1833	3	-1.0198	1389	0.89832	0.95943	1	16479	0
NOB1	0.0089957	0.0062206	0.1085	1089	3	-1.0191	1390	0.80557	0.90429	1	14822	0
ABLIM1	0.022185	0.026106	0.276912	1798	3	-1.019	1391	0.23872	0.49986	1	6798	1
OR2T2	0.0053542	0.0037322	0.085451	832	4	-1.0186	1392	0.99465	0.99892	1	18663	0
ARFRP1	0.017168	0.021353	0.262478	1555	4	-1.0184	1393	0.98283	0.99594	1	18299	0
NME6	0.022828	0.026516	0.278187	1820	4	-1.0182	1394	0.97717	0.99451	1	18143	0
DHX37	0.20907	0.24037	0.663293	6849	3	-1.0182	1395	0.9463	0.98238	1	17468	0
OR7E24	0.33653	0.34621	0.694352	9398	2	-1.0178	1396	0.44356	0.64673	1	9483	1
ALG6	0.039629	0.043739	0.329939	2533	3	-1.0173	1397	0.31768	0.59061	1	8283	1
IRF2	0.016115	0.02081	0.26245	1490	3	-1.0164	1398	0.92456	0.97185	1	17013	0
SPHAR	0.091414	0.085775	0.456965	3986	2	-1.0158	1399	0.90859	0.95905	1	16683	0
CMIP	0.21358	0.24334	0.663293	6977	3	-1.0153	1400	0.53906	0.70606	1	10570	1
GPATCH1	0.0044772	0.0030889	0.076495	766	4	-1.015	1401	0.99552	0.99914	1	18706	0
WBSCR17	0.04322	0.047051	0.332284	2672	3	-1.0149	1402	0.77203	0.87428	1	14196	0
GTF3C3	0.0012497	0.00074614	0.03358	418	4	-1.0143	1403	0.99875	0.99975	1	18897	0
KLF16	0.22581	0.26324	0.681962	7278	3	-1.0139	1404	0.82582	0.92156	1	15186	0
CHRNE	0.065838	0.070794	0.397751	3360	3	-1.0133	1405	0.4975	0.67371	1	10057	1
SCFD1	0.085869	0.10283	0.506463	3833	3	-1.0127	1406	0.94638	0.98238	1	17472	0
AARS	0.0020146	0.0013682	0.04991	517	4	-1.0126	1407	0.99799	0.9996	1	18844	0
HSP90B1	0.0087398	0.0061853	0.1085	1073	4	-1.0117	1408	0.99126	0.99836	1	18545	0
NMD3	0.0011259	0.00071868	0.033531	399	3	-1.0116	1409	0.5755	0.73003	1	11064	1
E4F1	0.0053659	0.0037322	0.085451	833	4	-1.0114	1410	0.99463	0.99892	1	18662	0
RPS6	0.17193	0.1898	0.608638	5954	3	-1.0114	1411	0.90812	0.96426	1	16674	0
EHMT1	0.0065707	0.0050696	0.103987	926	3	-1.0112	1412	0.88942	0.95289	1	16316	0
POGZ	0.041625	0.045137	0.330198	2609	3	-1.0112	1413	0.031471	0.13968	1	1559	1
TIPARP	0.0020465	0.0013729	0.04991	522	4	-1.0107	1414	0.99795	0.99959	1	18842	0
HNRNPCL1	0.10254	0.1184	0.525599	4258	3	-1.0107	1415	0.77668	0.87937	1	14287	0
DCAF7	0.0009308	0.00055915	0.028604	372	3	-1.0104	1416	0.8179	0.91352	1	15058	0
NSUN2	0.026994	0.030009	0.284674	2012	3	-1.0104	1417	0.94337	0.9814	1	17423	0
SLMAP	0.00082111	0.00045711	0.024503	345	4	-1.0098	1418	0.99918	0.99982	1	18939	0
TMEM184C	0.0029286	0.0023291	0.072864	608	3	-1.0091	1419	0.4106	0.62895	1	9159	1
CISD3	0.11686	0.13405	0.55799	4590	3	-1.0089	1420	0.42447	0.63621	1	9296	1
VPS16	0.0053363	0.0037146	0.085342	830	3	-1.0088	1421	0.78807	0.89048	1	14503	0
FARSA	0.030361	0.032886	0.287251	2161	4	-1.0088	1422	0.95105	0.985	1	17572	0
HNRNPF	0.0059624	0.0047102	0.101699	880	4	-1.0087	1423	0.99404	0.99885	1	18640	0
MMS22L	0.065507	0.070794	0.397751	3351	3	-1.0083	1424	0.73712	0.84787	1	13531	0
KAT5	0.09498	0.11086	0.52092	4066	3	-1.0078	1425	0.4326	0.64046	1	9373	1
HOXD1	0.0057431	0.0041166	0.091074	862	3	-1.0073	1426	0.71995	0.83169	1	13243	1
ETNPPL	0.011088	0.015509	0.238072	1223	4	-1.0071	1427	0.98891	0.99784	1	18457	0
TRIO	0.0084612	0.0060113	0.1083	1060	4	-1.0069	1428	0.99154	0.99836	1	18553	0
FITM1	0.13403	0.15546	0.580683	5014	3	-1.0068	1429	0.58083	0.73313	1	11138	1
RBM7	0.0077497	0.0055058	0.104208	999	4	-1.0066	1430	0.99225	0.99852	1	18580	0
TAF1	0.20299	0.23092	0.654291	6718	3	-1.0066	1431	0.93796	0.97794	1	17311	0
SMG1	0.043427	0.047179	0.332284	2687	4	-1.0065	1432	0.95657	0.98695	1	17673	0
STUB1	0.016426	0.021002	0.26245	1512	4	-1.0063	1433	0.98357	0.99623	1	18314	0
ZNF594	0.047476	0.050839	0.341351	2835	4	-1.0061	1434	0.95252	0.98567	1	17597	0
CENPO	0.0016309	0.00098803	0.040098	470	4	-1.0057	1435	0.99837	0.99966	1	18870	0
CLCNKA	0.061766	0.066839	0.38935	3265	3	-1.0053	1436	0.81339	0.90963	1	14970	0
DDX55	0.017531	0.022428	0.264604	1567	3	-1.0052	1437	0.73755	0.84787	1	13544	0
VCPKMT	0.081278	0.094272	0.48402	3720	3	-1.0051	1438	0.34623	0.60203	1	8532	1
DDX18	0.1097	0.12256	0.528607	4426	3	-1.0046	1439	0.097214	0.28947	1	3642	1
COL28A1	0.0019296	0.0011657	0.043949	504	3	-1.0043	1440	0.7648	0.86906	1	14056	0
NBPF11	0.077508	0.090124	0.47484	3626	3	-1.0039	1441	0.71171	0.82537	1	13097	1
NUDT21	0.0025768	0.0018214	0.060869	572	4	-1.0034	1442	0.99742	0.99953	1	18807	0
PLCH1	0.018671	0.022805	0.264604	1631	3	-1.0029	1443	0.75466	0.86009	1	13883	0
SLC25A37	0.0030893	0.002602	0.073058	627	3	-1.0027	1444	0.93234	0.97606	1	17193	0
PPT2	0.20679	0.23873	0.663293	6798	3	-1.0012	1445	0.41604	0.62998	1	9216	1
SLC25A3	0.013012	0.017611	0.255797	1316	3	-1.0011	1446	0.936	0.97772	1	17267	0
UQCRC1	0.00014289	8.8314e-05	0.008937	163	4	-1.0007	1447	0.99985	0.99998	1	19026	0
POLH	0.026352	0.029928	0.284674	1989	4	-1.0006	1448	0.9678	0.99105	1	17902	0
GPAA1	0.00099016	0.00058712	0.029379	380	4	-1.0002	1449	0.99901	0.99979	1	18919	0
DHRS4L2	0.11371	0.12814	0.541304	4522	3	-1.0001	1450	0.81651	0.91288	1	15031	0
NDE1	0.029488	0.03231	0.287251	2124	2	-0.99929	1451	0.90943	0.96524	1	16696	0
CXorf56	0.01957	0.023508	0.264604	1679	3	-0.99908	1452	0.87833	0.94685	1	16118	0
TBC1D5	0.015867	0.020679	0.26245	1478	4	-0.999	1453	0.98413	0.9964	1	18326	0
NOP10	0.0083423	0.0057679	0.104208	1047	4	-0.99899	1454	0.99121	0.99836	1	18541	0
NOP9	0.1006	0.11815	0.525599	4206	3	-0.99803	1455	0.84793	0.93224	1	15561	0
RPUSD3	0.00044327	0.00022972	0.016062	271	4	-0.99796	1456	0.99956	0.99992	1	18971	0
TARS	0.023891	0.02795	0.284674	1871	3	-0.9964	1457	0.71421	0.82747	1	13144	1
CFAP20	0.0033055	0.0026564	0.073058	657	4	-0.99635	1458	0.99669	0.99931	1	18768	0
PRPF18	0.033978	0.035365	0.292019	2304	4	-0.99635	1459	0.96602	0.99011	1	17865	0
GTF2H1	0.0018507	0.001059	0.04106	493	4	-0.9959	1460	0.99151	0.99836	1	18551	0
SARS2	0.0052044	0.0036768	0.085342	819	4	-0.9959	1461	0.9948	0.99898	1	18672	0
SACM1L	0.028005	0.030822	0.284895	2058	3	-0.9955	1462	0.87658	0.94642	1	16086	0
HMGA2	0.052802	0.060312	0.367648	3044	3	-0.99545	1463	0.37318	0.60919	1	8789	1
CPNE9	0.039617	0.043739	0.329939	2531	3	-0.99537	1464	0.88064	0.94907	1	16167	0
H6PD	0.040859	0.045018	0.33008	2585	3	-0.99472	1465	0.32494	0.59267	1	8342	1
TOP2A	0.15091	0.1657	0.583247	5419	3	-0.99421	1466	0.69293	0.80651	1	12737	1
ZNF593	0.00028543	0.00012405	0.010045	228	3	-0.99352	1467	0.93787	0.97772	1	17309	0
ISG20L2	0.045196	0.048552	0.336158	2754	4	-0.99245	1468	0.9548	0.98648	1	17639	0
TIMM22	0.041996	0.045908	0.332284	2627	3	-0.99233	1469	0.51223	0.68726	1	10229	1
COX15	0.038597	0.03941	0.301329	2494	3	-0.9912	1470	0.86026	0.93939	1	15793	0
HCFC1	0.25648	0.2883	0.681962	8031	2	-0.99115	1471	0.79035	0.89197	1	14549	0
SLC25A11	0.0084446	0.0057679	0.104208	1058	4	-0.99024	1472	0.99156	0.99836	1	18555	0
RRM1	0.16078	0.17654	0.593392	5674	3	-0.9902	1473	0.66029	0.78248	1	12214	1
RNASE6	0.0098729	0.010952	0.180451	1147	3	-0.99006	1474	0.16674	0.39997	1	5158	1
CHMP1B	0.02841	0.031406	0.286696	2078	4	-0.98994	1475	0.97159	0.99216	1	17997	0
KLK5	0.010557	0.014803	0.23662	1185	4	-0.98961	1476	0.98944	0.99793	1	18475	0
KXD1	0.015485	0.020288	0.26245	1457	3	-0.989	1477	0.82885	0.92156	1	15246	0
PRSS45	0.0024895	0.0018059	0.060685	566	3	-0.98882	1478	0.50281	0.67995	1	10115	1
SF3B3	0.080649	0.094271	0.48402	3705	3	-0.98819	1479	0.89802	0.95943	1	16474	0
ATP2A2	0.14515	0.1618	0.583247	5296	3	-0.98813	1480	0.80637	0.90501	1	14836	0
PSMB4	0.037719	0.038187	0.295525	2458	4	-0.98811	1481	0.96228	0.98897	1	17785	0
MAFA	0.1026	0.11897	0.525599	4260	3	-0.98702	1482	0.29756	0.57982	1	8066	1
SLC39A10	0.051917	0.05655	0.357344	3017	4	-0.98699	1483	0.94808	0.98337	1	17503	0
KPNA6	0.043568	0.04718	0.332284	2696	3	-0.98692	1484	0.75403	0.86009	1	13871	0
GNL3	0.077415	0.089626	0.472608	3624	3	-0.98667	1485	0.64042	0.76793	1	11920	1
NDEL1	0.038914	0.039852	0.303501	2506	3	-0.98525	1486	0.81801	0.91352	1	15061	0
NOL12	0.030393	0.032986	0.287251	2165	3	-0.98507	1487	0.88675	0.95205	1	16268	0
MRPS23	0.00060281	0.00032762	0.020136	309	4	-0.98478	1488	0.9994	0.99989	1	18953	0
TGS1	0.082564	0.095716	0.487638	3751	3	-0.98309	1489	0.4012	0.62483	1	9066	1
SGK223	0.0078535	0.0055638	0.104208	1008	4	-0.98305	1490	0.99215	0.99846	1	18577	0
PROX1	0.044619	0.047822	0.332284	2733	4	-0.98292	1491	0.95538	0.98679	1	17648	0
POLG2	0.018848	0.023012	0.264604	1640	4	-0.98291	1492	0.98115	0.99548	1	18255	0
ATP5O	0.0019432	0.0011657	0.043949	506	4	-0.98207	1493	0.96039	0.98815	1	17750	0
FNTB	0.017088	0.021309	0.26245	1550	4	-0.98199	1494	0.98291	0.99599	1	18302	0
DYNC1H1	0.018138	0.022645	0.264604	1601	3	-0.98089	1495	0.67234	0.79196	1	12409	1
CSK	0.021721	0.025859	0.276679	1772	3	-0.98084	1496	0.57718	0.73003	1	11083	1
SMEK2	0.061906	0.067043	0.38935	3271	3	-0.98061	1497	0.92473	0.97213	1	17019	0
TRPC4AP	0.006459	0.0049308	0.10256	913	3	-0.98053	1498	0.86512	0.94137	1	15881	0
SUPT6H	0.049013	0.054651	0.356768	2894	3	-0.97954	1499	0.8958	0.95873	1	16425	0
ANAPC4	0.0063386	0.0049303	0.10256	908	3	-0.97943	1500	0.724	0.83379	1	13316	0
TRA2A	0.043346	0.047179	0.332284	2680	4	-0.97935	1501	0.95665	0.98695	1	17678	0
IL17C	0.026332	0.029928	0.284674	1987	3	-0.97921	1502	0.92651	0.97373	1	17055	0
VKORC1L1	0.014466	0.019602	0.26245	1399	4	-0.97887	1503	0.97073	0.99185	1	17972	0
NAE1	0.0029752	0.0023881	0.073058	615	3	-0.97865	1504	0.40439	0.6279	1	9100	1
NDUFS5	0.028781	0.0315	0.286696	2092	3	-0.97834	1505	0.7146	0.82856	1	13148	1
DNAJC13	0.0087113	0.0061853	0.1085	1071	3	-0.97767	1506	0.47871	0.66956	1	9849	1
ZNF830	0.022058	0.025996	0.276679	1789	4	-0.97663	1507	0.97794	0.99458	1	18159	0
KIAA1549L	0.014161	0.01929	0.26245	1381	3	-0.9763	1508	0.6451	0.77	1	11983	1
PARP2	0.00020355	9.6083e-05	0.009096	199	4	-0.97615	1509	0.94884	0.98375	1	17521	0
TRAK1	0.071302	0.080189	0.43958	3486	3	-0.97544	1510	0.89741	0.95943	1	16457	0
SMIM11	0.020202	0.02363	0.264604	1706	4	-0.97501	1511	0.9798	0.99527	1	18206	0
MTMR9	0.0033297	0.0026564	0.073058	662	3	-0.97499	1512	0.9141	0.96867	1	16813	0
HIST1H2BC	0.068126	0.071434	0.397751	3412	3	-0.97435	1513	0.86969	0.94232	1	15960	0
PITRM1	0.0076588	0.0055052	0.104208	989	3	-0.97363	1514	0.94398	0.9818	1	17435	0
ARL2	0.041928	0.045576	0.332136	2621	3	-0.97288	1515	0.76661	0.86906	1	14091	0
BTF3L4	0.089182	0.1073	0.520833	3927	3	-0.97285	1516	0.32482	0.59267	1	8340	1
PTDSS1	0.12843	0.15293	0.580683	4889	3	-0.97185	1517	0.60169	0.74582	1	11409	1
RBM25	0.12936	0.15294	0.580683	4911	3	-0.97151	1518	0.93868	0.9786	1	17323	0
ZNF322	0.0015139	0.00091033	0.037932	449	4	-0.97147	1519	0.99849	0.99969	1	18883	0
SLC2A1	0.0020957	0.0013734	0.04991	525	4	-0.97121	1520	0.97667	0.99416	1	18127	0
WDR11	0.012833	0.01749	0.254617	1311	4	-0.97119	1521	0.98717	0.99722	1	18410	0
SEC23A	0.020709	0.024546	0.270058	1726	4	-0.97083	1522	0.97929	0.99497	1	18199	0
CCDC6	0.05278	0.060312	0.367648	3043	3	-0.97041	1523	0.60713	0.74899	1	11474	1
EZH2	0.0079122	0.0055643	0.104208	1011	4	-0.96956	1524	0.99209	0.99846	1	18575	0
USP17L28	0.19941	0.22939	0.654291	6630	3	-0.96909	1525	0.85528	0.93689	1	15707	0
COQ6	0.001272	0.00075546	0.03358	419	4	-0.96899	1526	0.99865	0.99973	1	18890	0
MT1A	0.036424	0.03677	0.292252	2399	3	-0.96879	1527	0.39459	0.62377	1	8989	1
UBL5	0.024702	0.028706	0.284674	1904	3	-0.96856	1528	0.88379	0.9512	1	16220	0
TXNL4B	0.037472	0.038187	0.295525	2446	4	-0.96802	1529	0.96253	0.98897	1	17792	0
COX14	0.0073983	0.0053612	0.104208	972	3	-0.96781	1530	0.70514	0.81911	1	12958	1
OBP2A	0.017078	0.021309	0.26245	1549	4	-0.96757	1531	0.98292	0.99599	1	18303	0
RSL24D1	0.0030858	0.0025699	0.073058	626	4	-0.96755	1532	0.99691	0.99936	1	18784	0
SHOC2	0.088764	0.10434	0.509046	3917	3	-0.9666	1533	0.74853	0.85823	1	13759	0
LSM5	0.0035562	0.0027118	0.073058	693	4	-0.96638	1534	0.99644	0.99925	1	18749	0
PIGR	0.069353	0.071693	0.398491	3437	3	-0.96624	1535	0.73861	0.84884	1	13567	0
POP1	0.003572	0.0027123	0.073058	695	4	-0.96592	1536	0.99643	0.99924	1	18746	0
NOC3L	0.011963	0.015768	0.238072	1265	4	-0.96578	1537	0.95865	0.98754	1	17722	0
GATB	0.007958	0.0055643	0.104208	1014	4	-0.96559	1538	0.97341	0.99276	1	18036	0
EARS2	0.022784	0.026398	0.277705	1817	4	-0.96543	1539	0.95892	0.98754	1	17727	0
CENPN	0.047981	0.051251	0.341351	2850	3	-0.96542	1540	0.15574	0.38103	1	4923	1
UTP20	0.013901	0.019191	0.26245	1368	3	-0.96486	1541	0.48915	0.67164	1	9973	1
NEURL1	0.013853	0.018884	0.26245	1362	4	-0.96484	1542	0.98615	0.99674	1	18393	0
ENTPD7	0.049383	0.054802	0.356768	2915	4	-0.96476	1543	0.95062	0.98482	1	17561	0
NCSTN	0.038052	0.03879	0.298984	2477	2	-0.96429	1544	0.42353	0.63411	1	9288	1
SUPT3H	0.015619	0.020288	0.26245	1464	4	-0.9642	1545	0.98438	0.99646	1	18332	0
FDX1	0.0024624	0.0017769	0.060116	563	4	-0.96404	1546	0.99754	0.99954	1	18811	0
CDC42BPA	0.021533	0.025859	0.276679	1765	3	-0.96383	1547	0.69942	0.81071	1	12848	1
GTF3C4	0.011077	0.015509	0.238072	1221	4	-0.96365	1548	0.98892	0.99784	1	18458	0
C19orf70	0.040504	0.044883	0.33008	2569	4	-0.96261	1549	0.9595	0.98771	1	17737	0
GTPBP10	0.01612	0.02081	0.26245	1491	4	-0.96253	1550	0.98388	0.99635	1	18321	0
EXOSC9	0.039218	0.043495	0.329929	2516	3	-0.96217	1551	0.90243	0.96189	1	16548	0
ZNF565	0.035545	0.036328	0.292019	2364	3	-0.96211	1552	0.24756	0.51219	1	6986	1
PPRC1	0.4238	0.40822	0.731039	10661	2	-0.96189	1553	0.6232	0.75855	1	11703	1
RBM26	0.051021	0.055731	0.356768	2981	4	-0.96008	1554	0.94898	0.98393	1	17524	0
KDM1A	0.0043345	0.0030521	0.076495	758	4	-0.95999	1555	0.99567	0.99914	1	18711	0
CENPF	0.003433	0.002703	0.073058	673	4	-0.95972	1556	0.99657	0.99926	1	18759	0
XG	0.0082598	0.0057673	0.104208	1038	4	-0.95963	1557	0.99174	0.99836	1	18563	0
OPA1	0.0096331	0.0068685	0.115982	1128	4	-0.95822	1558	0.99037	0.9981	1	18504	0
C14orf2	0.040062	0.04411	0.33008	2550	3	-0.9582	1559	0.46106	0.66123	1	9659	1
LSS	0.085339	0.10283	0.506463	3815	3	-0.958	1560	0.70377	0.81698	1	12933	1
VPS53	0.0053022	0.0037141	0.085342	827	4	-0.95785	1561	0.9947	0.99894	1	18664	0
PABPC1L	0.042902	0.04705	0.332284	2661	4	-0.95751	1562	0.9571	0.98711	1	17688	0
PI4KA	0.039651	0.043739	0.329939	2534	3	-0.95746	1563	0.90588	0.96361	1	16628	0
AFF4	0.027097	0.030128	0.284895	2016	3	-0.95718	1564	0.74762	0.85823	1	13738	0
DDX11	0.073261	0.084351	0.452947	3535	2	-0.95715	1565	0.82964	0.92213	1	15260	0
SYT12	0.10243	0.11815	0.525599	4256	3	-0.95712	1566	0.85179	0.93435	1	15634	0
MRTO4	0.030054	0.032587	0.287251	2151	3	-0.95672	1567	0.91122	0.96589	1	16739	0
ARHGEF37	0.036894	0.037576	0.295464	2419	3	-0.95664	1568	0.72268	0.83273	1	13287	0
DERL1	0.049353	0.054801	0.356768	2912	3	-0.9563	1569	0.9129	0.96747	1	16779	0
RBM18	0.04789	0.051104	0.341351	2847	3	-0.95627	1570	0.92957	0.97477	1	17125	0
MRPS2	0.034016	0.035365	0.292019	2306	3	-0.95623	1571	0.17281	0.41334	1	5297	1
SAPCD2	0.015834	0.020679	0.26245	1474	3	-0.95606	1572	0.84529	0.93113	1	15522	0
MRPL50	0.015605	0.020288	0.26245	1461	3	-0.95579	1573	0.66488	0.78459	1	12286	1
DDX54	0.0058867	0.0046304	0.10105	870	4	-0.95539	1574	0.99249	0.99858	1	18589	0
POLR2F	0.033946	0.035365	0.292019	2301	4	-0.95532	1575	0.96605	0.99011	1	17867	0
DNAAF2	0.026535	0.029928	0.284674	1995	3	-0.95526	1576	0.86843	0.94232	1	15938	0
SYPL2	0.053325	0.060312	0.367648	3057	3	-0.95276	1577	0.94189	0.98057	1	17389	0
PSMB7	0.23758	0.27417	0.681962	7556	2	-0.9525	1578	0.64334	0.77	1	11956	1
HIST1H1B	0.11639	0.13342	0.556856	4576	3	-0.95243	1579	0.40394	0.6279	1	9093	1
RILP	0.034964	0.036114	0.292019	2334	4	-0.95209	1580	0.96504	0.98974	1	17852	0
NAF1	0.017764	0.022587	0.264604	1579	3	-0.95204	1581	0.90327	0.9619	1	16576	0
ZNF540	0.021889	0.025996	0.276679	1780	3	-0.95182	1582	0.85705	0.93787	1	15737	0
NACC1	0.007846	0.0055638	0.104208	1007	4	-0.95175	1583	0.99215	0.99846	1	18578	0
SEC13	0.0059601	0.0047102	0.101699	879	4	-0.95156	1584	0.99404	0.99885	1	18641	0
LAT	0.025229	0.029388	0.284674	1932	4	-0.9512	1585	0.97477	0.99334	1	18068	0
PAXBP1	0.011982	0.015805	0.238072	1267	4	-0.95112	1586	0.98802	0.99749	1	18429	0
ARCN1	0.019262	0.023112	0.264604	1658	4	-0.95064	1587	0.98074	0.99548	1	18240	0
AMBP	0.046626	0.050719	0.341351	2811	4	-0.95062	1588	0.95337	0.98582	1	17614	0
GTF3C1	0.0080425	0.0056207	0.104208	1024	4	-0.95055	1589	0.99196	0.99846	1	18568	0
MLXIP	0.074645	0.084571	0.452947	3561	3	-0.95041	1590	0.89217	0.9545	1	16364	0
NFE2L2	0.01523	0.020194	0.26245	1441	4	-0.95015	1591	0.98477	0.99646	1	18346	0
SUN2	0.016129	0.02081	0.26245	1492	3	-0.95011	1592	0.11982	0.31973	1	4152	1
BRCA2	0.010064	0.011075	0.180451	1157	4	-0.9497	1593	0.95715	0.98711	1	17690	0
TMEM41B	0.00012178	7.3811e-05	0.008937	149	4	-0.9495	1594	0.99988	0.99998	1	19031	0
ZNF720	0.014439	0.019519	0.26245	1396	3	-0.94924	1595	0.80652	0.90501	1	14840	0
MORC2	0.13287	0.15546	0.580683	4987	3	-0.94916	1596	0.723	0.83379	1	13293	0
ITGAV	0.00069834	0.00041981	0.024274	325	3	-0.94912	1597	0.79371	0.89348	1	14616	0
NELFB	0.0019182	0.0011652	0.043949	502	4	-0.94894	1598	0.99808	0.99961	1	18850	0
C10orf90	0.044979	0.047822	0.332284	2745	3	-0.94869	1599	0.72359	0.83379	1	13307	0
NFS1	0.02989	0.03249	0.287251	2143	4	-0.94866	1600	0.97011	0.99153	1	17957	0
PANK4	0.029039	0.031721	0.286696	2102	2	-0.9486	1601	0.8116	0.90833	1	14939	0
TACC3	0.00095372	0.0005778	0.029379	375	4	-0.94836	1602	0.99634	0.99924	1	18741	0
SNRNP35	0.0010554	0.00066637	0.032519	388	4	-0.94827	1603	0.99894	0.99979	1	18914	0
VWA5B2	0.027547	0.030527	0.284895	2039	3	-0.94783	1604	0.88586	0.95205	1	16251	0
DUSP12	0.010009	0.011075	0.180451	1154	4	-0.94726	1605	0.98999	0.99805	1	18495	0
CXXC1	0.0044098	0.0030889	0.076495	761	4	-0.94725	1606	0.9934	0.99872	1	18621	0
TNFRSF11A	0.0019091	0.0011652	0.043949	501	3	-0.94698	1607	0.53124	0.69879	1	10452	1
RPN1	0.038079	0.03879	0.298984	2478	4	-0.94691	1608	0.96192	0.98897	1	17776	0
VRK1	6.9229e-05	4.9466e-05	0.007535	118	4	-0.94664	1609	0.99993	0.99999	1	19045	0
NDUFAF1	0.059313	0.062255	0.36934	3217	3	-0.94468	1610	0.6459	0.77	1	11996	1
KIF23	0.035933	0.036438	0.292042	2379	3	-0.94431	1611	0.39947	0.62483	1	9044	1
FANCA	0.0030578	0.0024249	0.073058	623	3	-0.94417	1612	0.49778	0.67371	1	10061	1
CLUH	0.0044613	0.0030889	0.076495	763	4	-0.94321	1613	0.98097	0.99548	1	18248	0
USPL1	0.074709	0.084571	0.452947	3564	3	-0.94311	1614	0.88972	0.95329	1	16323	0
CBWD1	0.20889	0.23991	0.663293	6845	3	-0.94263	1615	0.93307	0.97681	1	17204	0
OBSCN	0.091479	0.10877	0.520833	3988	3	-0.94251	1616	0.8744	0.94459	1	16048	0
BOLA3	0.21969	0.24872	0.666695	7121	2	-0.94247	1617	0.11757	0.31625	1	4097	1
RPS5	0.010975	0.015173	0.237928	1217	3	-0.94243	1618	0.38029	0.61123	1	8862	1
ADAM17	0.035131	0.036114	0.292019	2342	4	-0.94238	1619	0.96487	0.98974	1	17846	0
LIPT2	0.023825	0.02795	0.284674	1868	4	-0.94199	1620	0.9529	0.98582	1	17603	0
EIF2S1	0.041467	0.045018	0.33008	2604	3	-0.94186	1621	0.73738	0.84787	1	13538	0
RPAP3	0.046175	0.049804	0.340606	2795	3	-0.94178	1622	0.85355	0.93589	1	15673	0
WFDC2	0.017423	0.022094	0.264604	1562	3	-0.94098	1623	0.40806	0.62895	1	9134	1
TPSG1	0.11785	0.13756	0.567314	4615	3	-0.94094	1624	0.44581	0.65191	1	9504	1
NLGN2	0.0049852	0.0033914	0.079738	801	4	-0.94081	1625	0.99501	0.99907	1	18682	0
TBC1D3H	0.21766	0.24761	0.666695	7072	3	-0.94045	1626	0.68899	0.80449	1	12683	1
USP36	0.015034	0.019907	0.26245	1430	4	-0.93967	1627	0.98497	0.99646	1	18353	0
CDK2	0.0031734	0.0026352	0.073058	637	3	-0.93923	1628	0.86582	0.94137	1	15898	0
C21orf140	0.0034484	0.0027118	0.073058	675	4	-0.93897	1629	0.99655	0.99925	1	18758	0
TGFBRAP1	0.036138	0.03677	0.292252	2387	4	-0.9386	1630	0.96386	0.98897	1	17823	0
TXNRD3	0.030279	0.032733	0.287251	2158	3	-0.93773	1631	0.49168	0.67164	1	9999	1
RNF31	0.0014268	0.00079793	0.03443	443	4	-0.93764	1632	0.96916	0.99129	1	17936	0
SFPQ	0.23341	0.26815	0.681962	7475	3	-0.93729	1633	0.80796	0.90568	1	14869	0
SECISBP2	0.013843	0.018884	0.26245	1358	3	-0.93725	1634	0.8338	0.92445	1	15338	0
SAP25	0.10218	0.11815	0.525599	4249	3	-0.93677	1635	0.22511	0.47944	1	6508	1
EPT1	0.015639	0.020288	0.26245	1468	4	-0.93617	1636	0.98436	0.99646	1	18330	0
RTN1	0.012641	0.01671	0.24515	1300	4	-0.93614	1637	0.98736	0.99731	1	18412	0
IKBKB	0.017632	0.022533	0.264604	1572	3	-0.93609	1638	0.22911	0.48521	1	6600	1
SMG9	0.0019756	0.0013604	0.04991	509	4	-0.93603	1639	0.99802	0.99961	1	18848	0
GARS	0.068533	0.071435	0.397751	3420	3	-0.93575	1640	0.33414	0.59684	1	8427	1
COPS3	0.0060764	0.0047511	0.101699	891	4	-0.93552	1641	0.98273	0.99581	1	18298	0
YEATS4	0.015792	0.02034	0.26245	1473	4	-0.93539	1642	0.97093	0.99194	1	17978	0
CNTROB	0.16361	0.18235	0.604177	5744	3	-0.93482	1643	0.7592	0.86192	1	13958	0
CARD9	0.088914	0.1073	0.520833	3920	3	-0.93466	1644	0.29203	0.57317	1	7947	1
PPIE	0.0089725	0.0062206	0.1085	1087	4	-0.93457	1645	0.99103	0.99832	1	18536	0
VAMP1	0.14302	0.15997	0.580683	5242	3	-0.93402	1646	0.51503	0.6893	1	10261	1
OR4F21	0.46146	0.44256	0.750266	11213	2	-0.9335	1647	0.34807	0.60304	1	8551	1
INTS7	0.13894	0.15855	0.580683	5145	3	-0.93322	1648	0.87878	0.94729	1	16129	0
ZFYVE28	0.00086246	0.00045763	0.024503	355	4	-0.93276	1649	0.99914	0.99982	1	18934	0
NUP93	0.024129	0.02815	0.284674	1876	4	-0.93266	1650	0.97587	0.9939	1	18106	0
VPS51	0.027938	0.030741	0.284895	2053	4	-0.93262	1651	0.97206	0.99235	1	18005	0
ZNF236	0.11097	0.12531	0.532862	4463	3	-0.93221	1652	0.85035	0.93382	1	15614	0
RPL27	0.17873	0.20509	0.639728	6114	3	-0.93219	1653	0.91168	0.96621	1	16749	0
NPRL3	0.056057	0.0612	0.367648	3140	2	-0.93213	1654	0.63443	0.76793	1	11842	1
WDR75	0.17782	0.20379	0.639119	6092	3	-0.93197	1655	0.90726	0.96361	1	16659	0
RAD1	0.002658	0.0020804	0.068095	584	4	-0.93172	1656	0.97494	0.99344	1	18080	0
THTPA	0.025521	0.029635	0.284674	1946	4	-0.93168	1657	0.97448	0.99306	1	18062	0
ACSL3	0.0011469	0.00071868	0.033531	404	4	-0.93124	1658	0.99885	0.99978	1	18906	0
BRIX1	0.087656	0.10331	0.506463	3888	3	-0.93079	1659	0.9407	0.97992	1	17366	0
NOM1	0.088642	0.10382	0.506767	3911	3	-0.9307	1660	0.82154	0.91728	1	15114	0
PRDM1	0.012159	0.016171	0.239075	1278	4	-0.93045	1661	0.96991	0.99141	1	17952	0
CHERP	0.023044	0.026783	0.279615	1826	4	-0.93042	1662	0.97696	0.99433	1	18138	0
POLD3	0.050314	0.055588	0.356768	2948	3	-0.92941	1663	0.67716	0.79721	1	12481	1
ZNF561	0.040421	0.044883	0.33008	2565	3	-0.92878	1664	0.27172	0.54633	1	7520	1
PATZ1	0.028787	0.0315	0.286696	2093	3	-0.92868	1665	0.46086	0.66123	1	9657	1
PCYT1A	0.0057918	0.0041362	0.091298	864	4	-0.92862	1666	0.97336	0.99276	1	18034	0
TMCO6	0.04277	0.04705	0.332284	2657	4	-0.92798	1667	0.95723	0.98711	1	17694	0
UNC45A	0.023948	0.028027	0.284674	1873	3	-0.92732	1668	0.38256	0.61331	1	8878	1
PARP1	0.00049909	0.00025614	0.017181	281	3	-0.92725	1669	0.57458	0.72896	1	11053	1
TRAF1	0.081782	0.095202	0.485797	3734	3	-0.92723	1670	0.94668	0.98238	1	17475	0
PAH	0.081789	0.095202	0.485797	3735	2	-0.92708	1671	0.31841	0.59061	1	8289	1
FAM178A	0.043874	0.047357	0.332284	2704	4	-0.92693	1672	0.95613	0.98695	1	17662	0
PTTG1	0.017914	0.022587	0.264604	1589	3	-0.92678	1673	0.34333	0.60203	1	8511	1
SRRM2	0.080592	0.094271	0.48402	3703	3	-0.92675	1674	0.42441	0.63621	1	9295	1
MBD3L5	0.024327	0.028705	0.284674	1887	4	-0.92651	1675	0.97567	0.99371	1	18100	0
EIF3J	0.11414	0.12901	0.54197	4533	2	-0.92623	1676	0.8889	0.95245	1	16305	0
PDCL3	0.00082749	0.00045711	0.024503	348	3	-0.9257	1677	0.43064	0.64046	1	9356	1
EMC2	0.032739	0.034122	0.288348	2258	3	-0.9254	1678	0.48029	0.66956	1	9869	1
TTC28	0.073387	0.084352	0.452947	3539	3	-0.92483	1679	0.91764	0.96955	1	16881	0
OTOP2	0.024178	0.028233	0.284674	1881	4	-0.92457	1680	0.97582	0.99381	1	18103	0
ELOVL1	0.051709	0.056404	0.357344	3009	3	-0.92444	1681	0.87042	0.94232	1	15977	0
MAT2A	0.0042824	0.0030521	0.076495	753	4	-0.92435	1682	0.99572	0.99914	1	18714	0
VPS9D1	0.048807	0.054651	0.356768	2881	3	-0.92412	1683	0.89557	0.95873	1	16416	0
PRRC2C	0.039065	0.039853	0.303501	2510	3	-0.92312	1684	0.41797	0.63098	1	9234	1
XPO7	0.044319	0.047821	0.332284	2721	3	-0.9231	1685	0.86573	0.94137	1	15896	0
NUP205	0.18495	0.21594	0.649967	6265	3	-0.92296	1686	0.92419	0.97155	1	17005	0
C10orf111	0.010079	0.011075	0.180451	1159	4	-0.92295	1687	0.98992	0.99805	1	18492	0
A2ML1	0.028892	0.031721	0.286696	2097	4	-0.92275	1688	0.9711	0.99194	1	17984	0
ZRANB2	0.012594	0.016667	0.24515	1299	3	-0.92259	1689	0.91169	0.96621	1	16750	0
LIN37	2.3781e-06	7.7695e-07	0.000424	31	4	-0.92224	1690	1	1	1	19093	0
FCF1	0.044952	0.047822	0.332284	2744	3	-0.92138	1691	0.92165	0.97099	1	16959	0
SZT2	0.052029	0.056551	0.357344	3023	3	-0.92069	1692	0.79784	0.89722	1	14696	0
LPPR3	0.014236	0.019374	0.26245	1385	4	-0.92049	1693	0.98576	0.99663	1	18382	0
ACTN1	0.026945	0.030009	0.284674	2008	4	-0.92034	1694	0.97305	0.99276	1	18028	0
CELF6	0.01225	0.016172	0.239075	1284	4	-0.92017	1695	0.98775	0.99744	1	18422	0
SRPK1	0.00052101	0.00025976	0.017181	285	3	-0.92006	1696	0.50911	0.68205	1	10191	1
PLCXD2	0.013295	0.018104	0.259224	1332	3	-0.9199	1697	0.26997	0.54523	1	7488	1
ZNF584	0.029137	0.031722	0.286696	2107	4	-0.91973	1698	0.95326	0.98582	1	17609	0
MRPL15	0.0014574	0.00081762	0.035121	445	3	-0.91957	1699	0.93151	0.97606	1	17172	0
GTF3C6	0.0013167	0.00076012	0.03358	424	2	-0.91956	1700	0.60682	0.74794	1	11472	1
BET1	0.1119	0.12531	0.532862	4493	3	-0.91942	1701	0.73803	0.84884	1	13554	0
C12orf77	0.040139	0.04411	0.33008	2553	4	-0.91905	1702	0.95986	0.98771	1	17741	0
ALG14	0.0072282	0.0053312	0.104208	963	2	-0.91903	1703	0.40127	0.62483	1	9067	1
EIF2B1	0.0038496	0.0029159	0.076495	721	3	-0.91776	1704	0.9318	0.97606	1	17179	0
RAB3GAP1	0.069896	0.075189	0.415989	3452	3	-0.91732	1705	0.92898	0.9745	1	17111	0
FOXC2	0.079176	0.093814	0.48402	3669	3	-0.91721	1706	0.59041	0.7374	1	11265	1
ITPK1	0.0003113	0.00012664	0.010045	241	4	-0.91706	1707	0.99969	0.99996	1	18986	0
TMA16	0.0059543	0.0047096	0.101699	878	2	-0.91694	1708	0.25331	0.51792	1	7114	1
ATP6V1G1	0.050389	0.055588	0.356768	2953	4	-0.91632	1709	0.94961	0.9841	1	17540	0
G0S2	0.0032559	0.0026564	0.073058	649	4	-0.91625	1710	0.99577	0.99914	1	18716	0
EXOC5	0.0058972	0.0046304	0.10105	874	4	-0.91621	1711	0.9941	0.99889	1	18643	0
SERINC1	0.036157	0.03677	0.292252	2388	4	-0.91618	1712	0.95379	0.98597	1	17621	0
SSX5	0.066463	0.071012	0.397751	3375	3	-0.9157	1713	0.90743	0.96426	1	16661	0
DNTTIP1	0.0083508	0.0057679	0.104208	1048	4	-0.91541	1714	0.98838	0.99775	1	18440	0
NAPA	0.054303	0.060313	0.367648	3091	3	-0.91541	1715	0.54727	0.71015	1	10691	1
EVA1B	0.029842	0.03249	0.287251	2139	2	-0.91536	1716	0.71552	0.82856	1	13161	1
EIF3H	0.026716	0.030008	0.284674	2001	3	-0.91509	1717	0.25355	0.51792	1	7121	1
OTOR	0.00053315	0.00025976	0.017181	289	3	-0.91498	1718	0.74477	0.85639	1	13685	0
ZC3H4	0.0098886	0.010992	0.180451	1149	3	-0.91482	1719	0.72796	0.83787	1	13385	0
DCTN6	0.014662	0.01971	0.26245	1407	4	-0.91421	1720	0.98534	0.99657	1	18367	0
CDC40	0.15832	0.17516	0.593392	5618	3	-0.91347	1721	0.73753	0.84787	1	13543	0
GTF3C2	0.026519	0.029928	0.284674	1993	3	-0.91325	1722	0.84961	0.93382	1	15600	0
KLHL9	0.020385	0.023862	0.265961	1714	3	-0.9126	1723	0.76284	0.86731	1	14018	0
DYNC1LI2	0.031068	0.033214	0.287251	2192	3	-0.91144	1724	0.86815	0.94232	1	15933	0
IFNB1	0.015892	0.020679	0.26245	1479	3	-0.91109	1725	0.46563	0.6654	1	9711	1
TRIM49D1	0.061221	0.063431	0.372158	3252	3	-0.90966	1726	0.91342	0.96777	1	16792	0
CACNA1B	0.043132	0.047051	0.332284	2669	3	-0.90905	1727	0.5588	0.71853	1	10835	1
SEPHS1	0.020978	0.024611	0.270058	1741	4	-0.90901	1728	0.97902	0.99489	1	18193	0
ZBTB8OS	0.019089	0.023111	0.264604	1652	4	-0.90885	1729	0.98091	0.99548	1	18244	0
CCDC14	0.072351	0.083896	0.452947	3512	3	-0.90845	1730	0.2053	0.45408	1	6067	1
PPP1CA	0.007012	0.0053027	0.104208	948	4	-0.90742	1731	0.98382	0.99623	1	18320	0
PSMB2	0.10798	0.12091	0.527271	4379	3	-0.90739	1732	0.66858	0.79095	1	12350	1
DHFR	0.036256	0.03677	0.292252	2390	4	-0.90716	1733	0.96374	0.98897	1	17821	0
YES1	0.004472	0.0030889	0.076495	765	3	-0.90692	1734	0.88535	0.95205	1	16242	0
MAB21L2	0.030529	0.032986	0.287251	2168	3	-0.9068	1735	0.76131	0.86551	1	13991	0
KARS	0.0072418	0.0053607	0.104208	964	4	-0.90677	1736	0.99276	0.99858	1	18604	0
ZNF207	0.030645	0.033112	0.287251	2171	2	-0.90659	1737	0.8903	0.95329	1	16333	0
PSMB1	0.021357	0.025385	0.275544	1759	4	-0.90639	1738	0.97864	0.99482	1	18181	0
NDUFA7	0.034405	0.035613	0.292019	2314	3	-0.90613	1739	0.25451	0.52122	1	7146	1
NDUFB2	0.046617	0.050719	0.341351	2809	4	-0.9045	1740	0.95247	0.98567	1	17596	0
C7orf55-LUC7L2	0.0727	0.084351	0.452947	3518	3	-0.90443	1741	0.92941	0.97477	1	17122	0
TERT	0.011584	0.015577	0.238072	1245	4	-0.90418	1742	0.9807	0.99548	1	18237	0
PLEKHG6	0.039259	0.043496	0.329929	2519	4	-0.90418	1743	0.96074	0.98844	1	17757	0
ELAC2	0.00063308	0.00033435	0.020354	313	4	-0.90384	1744	0.99937	0.99988	1	18950	0
GFRA3	0.065161	0.070794	0.397751	3342	3	-0.90368	1745	0.19604	0.44118	1	5847	1
MAFK	0.049792	0.055436	0.356768	2931	3	-0.90357	1746	0.73835	0.84884	1	13561	0
STT3B	0.189	0.21783	0.649967	6371	3	-0.90354	1747	0.92137	0.97099	1	16952	0
PDCD5	0.011748	0.015654	0.238072	1256	4	-0.90306	1748	0.98825	0.99766	1	18434	0
CD3D	0.047102	0.05072	0.341351	2823	3	-0.90272	1749	0.18258	0.4246	1	5515	1
PLEKHO2	0.0037449	0.0027289	0.073058	713	4	-0.90251	1750	0.99626	0.99923	1	18738	0
NHLRC3	0.013898	0.019191	0.26245	1366	3	-0.9024	1751	0.72585	0.83582	1	13340	0
ZMIZ2	0.070518	0.07653	0.42146	3470	3	-0.9023	1752	0.91627	0.96925	1	16845	0
ANKRD12	0.0098258	0.010952	0.180451	1143	3	-0.90195	1753	0.90606	0.96361	1	16633	0
CCDC91	0.0289	0.031721	0.286696	2098	3	-0.90159	1754	0.82491	0.92095	1	15172	0
NBPF10	0.11978	0.14225	0.580683	4673	2	-0.90145	1755	0.85302	0.93537	1	15664	0
FMN1	0.0256	0.029721	0.284674	1951	3	-0.90083	1756	0.67984	0.79928	1	12520	1
COL6A1	0.078089	0.09083	0.475024	3645	3	-0.90064	1757	0.83382	0.92445	1	15339	0
RSPH3	0.06501	0.070794	0.397751	3338	3	-0.89999	1758	0.81048	0.90698	1	14919	0
GID8	0.061357	0.063431	0.372158	3256	3	-0.89982	1759	0.60672	0.74794	1	11470	1
FGF22	0.082919	0.09863	0.500353	3758	3	-0.89973	1760	0.9176	0.96955	1	16878	0
CXorf57	0.078617	0.093813	0.48402	3662	3	-0.8996	1761	0.89604	0.95909	1	16433	0
ATRIP	0.00088902	0.0004742	0.024971	361	4	-0.89955	1762	0.99911	0.99982	1	18929	0
PKD2	0.072958	0.084351	0.452947	3525	3	-0.89924	1763	0.89272	0.95488	1	16372	0
SEH1L	0.034606	0.035757	0.292019	2323	4	-0.89909	1764	0.96539	0.98999	1	17856	0
PDDC1	0.035936	0.036438	0.292042	2380	3	-0.89896	1765	0.33023	0.59684	1	8387	1
H2AFB1	0.031071	0.033214	0.287251	2193	4	-0.89888	1766	0.96893	0.99117	1	17930	0
CCL19	0.030057	0.032587	0.287251	2152	3	-0.89849	1767	0.8713	0.94326	1	15995	0
ZNHIT1	0.005838	0.004373	0.096079	866	4	-0.89839	1768	0.94873	0.98375	1	17515	0
SPATA33	0.012254	0.016172	0.239075	1286	4	-0.89825	1769	0.98775	0.99744	1	18420	0
GLUD1	0.044093	0.047821	0.332284	2710	3	-0.89802	1770	0.76937	0.87259	1	14148	0
KRTAP10-4	0.011305	0.015509	0.238072	1230	4	-0.89798	1771	0.9887	0.99783	1	18450	0
PRKRIP1	0.0010461	0.0006384	0.031696	385	3	-0.89785	1772	0.81189	0.90833	1	14944	0
PDXK	0.020067	0.023629	0.264604	1701	3	-0.89639	1773	0.49472	0.67164	1	10034	1
PLCB3	0.023391	0.027308	0.281442	1847	4	-0.89583	1774	0.97661	0.99416	1	18120	0
GPR182	0.10056	0.11815	0.525599	4205	2	-0.89573	1775	0.67258	0.79196	1	12415	1
DEK	0.0068737	0.0051458	0.104208	943	3	-0.8953	1776	0.39413	0.62277	1	8983	1
CDC5L	0.0082981	0.0057673	0.104208	1044	4	-0.89521	1777	0.9917	0.99836	1	18558	0
ATP5D	0.011855	0.015732	0.238072	1259	3	-0.8948	1778	0.93442	0.97749	1	17237	0
ASAP1	0.050752	0.055731	0.356768	2969	3	-0.89461	1779	0.9401	0.97969	1	17356	0
C3orf62	0.05043	0.055588	0.356768	2956	3	-0.89449	1780	0.20768	0.45954	1	6125	1
OLA1	0.0019475	0.0011657	0.043949	507	4	-0.89385	1781	0.99202	0.99846	1	18572	0
TBCK	0.099703	0.1179	0.525599	4181	3	-0.89377	1782	0.81775	0.91352	1	15055	0
PRR4	0.078173	0.09083	0.475024	3649	3	-0.89282	1783	0.88647	0.95205	1	16262	0
HIST1H2BE	0.015495	0.020288	0.26245	1458	4	-0.89274	1784	0.97699	0.99443	1	18139	0
USP17L27	0.08847	0.10382	0.506767	3908	3	-0.89269	1785	0.91516	0.96896	1	16825	0
FOXI2	0.096663	0.11379	0.525599	4101	3	-0.89266	1786	0.66315	0.78354	1	12258	1
NFATC2IP	0.022758	0.026398	0.277705	1815	4	-0.89215	1787	0.97724	0.99451	1	18146	0
LRCH2	0.023779	0.027949	0.284674	1867	3	-0.89157	1788	0.89174	0.9541	1	16358	0
COA7	0.01301	0.017568	0.255374	1315	3	-0.89129	1789	0.71855	0.83064	1	13218	1
ATP11C	0.006158	0.0048272	0.10256	896	3	-0.89122	1790	0.75662	0.86192	1	13911	0
FAM118B	0.013199	0.018009	0.258642	1327	3	-0.89107	1791	0.785	0.88893	1	14446	0
STMN1	0.0022642	0.0015174	0.053123	546	4	-0.89037	1792	0.99774	0.99956	1	18825	0
QDPR	0.033034	0.034313	0.288691	2268	3	-0.89036	1793	0.56989	0.72688	1	10991	1
SRPR	0.011157	0.015509	0.238072	1226	4	-0.89003	1794	0.9767	0.99416	1	18129	0
COX5A	0.00036169	0.00016238	0.012069	254	4	-0.88979	1795	0.99964	0.99994	1	18976	0
SSRP1	0.032806	0.034122	0.288348	2260	4	-0.88976	1796	0.95765	0.98725	1	17701	0
CENPH	0.012239	0.016171	0.239075	1282	4	-0.88951	1797	0.98776	0.99744	1	18424	0
ERCC3	0.013452	0.018237	0.259768	1339	2	-0.88907	1798	0.86544	0.94137	1	15886	0
DARS	0.081564	0.09476	0.485745	3727	3	-0.88904	1799	0.59586	0.74056	1	11339	1
ATG10	0.058965	0.062255	0.36934	3210	3	-0.88863	1800	0.53753	0.70606	1	10548	1
TTC4	0.13342	0.15546	0.580683	5003	2	-0.88862	1801	0.77284	0.87428	1	14215	0
HIST1H2BK	0.0070639	0.0053307	0.104208	953	4	-0.88807	1802	0.99294	0.99861	1	18610	0
SPATA13	0.0072978	0.0053607	0.104208	967	4	-0.88801	1803	0.9927	0.99858	1	18600	0
TRMT6	0.0016867	0.0010051	0.040448	474	4	-0.88797	1804	0.99795	0.99959	1	18841	0
CLP1	0.036806	0.037576	0.295464	2413	2	-0.88769	1805	0.85962	0.93939	1	15781	0
TBCB	0.084302	0.10208	0.506463	3785	3	-0.88745	1806	0.22058	0.47605	1	6420	1
CORO1B	0.055979	0.0612	0.367648	3135	3	-0.88732	1807	0.89899	0.96018	1	16496	0
APOBEC3D	0.15204	0.16668	0.583247	5448	3	-0.8872	1808	0.0021938	0.01422	1	212	1
WDR48	0.037921	0.038635	0.298388	2472	3	-0.88675	1809	0.9039	0.96261	1	16585	0
KIAA2026	0.08797	0.10331	0.506463	3893	2	-0.88603	1810	0.51415	0.6893	1	10252	1
GRID1	0.070681	0.076781	0.422111	3473	3	-0.88542	1811	0.91985	0.96984	1	16925	0
ZNF416	0.023276	0.027308	0.281442	1836	4	-0.8852	1812	0.96833	0.99105	1	17915	0
TBC1D23	0.076658	0.08669	0.458899	3608	3	-0.88398	1813	0.76259	0.86731	1	14014	0
TAF3	0.0037297	0.0027289	0.073058	711	4	-0.88308	1814	0.99627	0.99923	1	18739	0
RBX1	0.026444	0.029928	0.284674	1992	2	-0.88299	1815	0.84091	0.92953	1	15452	0
COA3	0.29191	0.31538	0.686694	8774	2	-0.88296	1816	0.82942	0.92156	1	15255	0
SAMD12	0.16984	0.18798	0.607152	5898	2	-0.88295	1817	0.53448	0.70194	1	10499	1
PABPN1	0.15428	0.17077	0.591446	5516	3	-0.88291	1818	0.81406	0.90963	1	14984	0
TWF2	0.0050666	0.0033914	0.079738	810	3	-0.88243	1819	0.86123	0.93939	1	15812	0
MAD2L2	0.01654	0.021047	0.26245	1519	2	-0.88159	1820	0.18473	0.42904	1	5562	2
SDR39U1	0.019444	0.023445	0.264604	1669	4	-0.88151	1821	0.98056	0.99548	1	18231	0
REXO2	0.0008895	0.0004742	0.024971	362	4	-0.88126	1822	0.99874	0.99975	1	18896	0
GOLGA6L6	0.018969	0.023111	0.264604	1645	4	-0.88109	1823	0.98103	0.99548	1	18251	0
FAM9A	0.025172	0.029388	0.284674	1928	3	-0.88067	1824	0.7885	0.89048	1	14514	0
GUCY2C	0.010773	0.015063	0.237928	1202	3	-0.87993	1825	0.82948	0.92156	1	15257	0
DOCK7	0.0049969	0.0033914	0.079738	803	4	-0.87991	1826	0.995	0.99907	1	18680	0
RFC5	0.091843	0.10902	0.520855	3998	3	-0.8797	1827	0.92899	0.9745	1	17112	0
TSEN2	0.0047399	0.0031982	0.077877	785	4	-0.87896	1828	0.99515	0.9991	1	18689	0
RGS19	0.0053772	0.0037327	0.085451	834	4	-0.87893	1829	0.99462	0.99892	1	18661	0
RBFA	0.033138	0.034703	0.291076	2275	4	-0.87889	1830	0.96686	0.99071	1	17878	0
AMY2A	0.0052789	0.0036955	0.085342	826	4	-0.8788	1831	0.99472	0.99896	1	18665	0
TMEM55A	0.047487	0.050839	0.341351	2836	3	-0.87873	1832	0.90851	0.96493	1	16682	0
EXOC3	0.011007	0.015173	0.237928	1219	4	-0.87824	1833	0.98899	0.99784	1	18459	0
CDC7	0.11213	0.12614	0.535092	4498	2	-0.87818	1834	0.29625	0.57866	1	8031	1
NUMA1	0.17078	0.18877	0.607152	5928	3	-0.87782	1835	0.8168	0.91288	1	15038	0
MRPS16	0.0051283	0.0034168	0.080051	814	4	-0.87762	1836	0.99131	0.99836	1	18547	0
EMC3	0.010289	0.011076	0.180451	1169	4	-0.87746	1837	0.98971	0.99805	1	18482	0
ECE2	0.019902	0.023571	0.264604	1695	3	-0.87739	1838	0.026114	0.11885	1	1327	1
TULP4	0.00437	0.0030521	0.076495	759	4	-0.87711	1839	0.97286	0.99276	1	18025	0
CTXN3	0.040267	0.044283	0.33008	2559	3	-0.87702	1840	0.84328	0.93005	1	15488	0
WDR70	0.0074774	0.0054084	0.104208	975	4	-0.87687	1841	0.99252	0.99858	1	18592	0
TALDO1	0.01807	0.022645	0.264604	1598	4	-0.8766	1842	0.98193	0.99556	1	18276	0
CLASRP	0.084614	0.10232	0.506463	3797	3	-0.87523	1843	0.60146	0.74582	1	11404	1
ERMAP	0.12904	0.15293	0.580683	4904	3	-0.87483	1844	0.55899	0.71957	1	10838	1
RMI2	0.00059849	0.00032762	0.020136	307	4	-0.8748	1845	0.98762	0.99744	1	18419	0
TLX2	0.14273	0.15997	0.580683	5230	3	-0.87443	1846	0.86249	0.93939	1	15835	0
TRAPPC2L	0.017772	0.022587	0.264604	1580	4	-0.87398	1847	0.98223	0.99562	1	18285	0
WDR25	0.10485	0.11954	0.525599	4319	3	-0.87377	1848	0.29768	0.57982	1	8068	1
SNAPC5	0.0017998	0.0010341	0.04059	487	4	-0.87364	1849	0.9982	0.99964	1	18860	0
TNR	0.092504	0.10981	0.52092	4013	3	-0.87342	1850	0.29827	0.58302	1	8077	1
SPSB2	0.033862	0.035365	0.292019	2297	4	-0.87336	1851	0.96614	0.99011	1	17869	0
ARID1A	0.037403	0.038187	0.295525	2440	3	-0.87308	1852	0.63948	0.76793	1	11908	1
HP	0.072255	0.083896	0.452947	3507	3	-0.87265	1853	0.82182	0.91728	1	15123	0
SLIT2	0.050943	0.055731	0.356768	2973	3	-0.87242	1854	0.19265	0.43729	1	5761	1
MYADML2	0.014945	0.019856	0.26245	1423	3	-0.87096	1855	0.19503	0.43973	1	5824	1
S100A5	0.015247	0.020194	0.26245	1443	4	-0.87083	1856	0.98475	0.99646	1	18345	0
FBXW5	0.11079	0.1253	0.532862	4456	3	-0.87081	1857	0.85267	0.93537	1	15653	0
DEFB126	0.038385	0.039409	0.301329	2490	3	-0.87076	1858	0.51066	0.68515	1	10212	1
TLR5	0.090413	0.1083	0.520833	3961	3	-0.8706	1859	0.91664	0.96925	1	16858	0
ICT1	0.0084022	0.0057679	0.104208	1054	4	-0.87045	1860	0.9916	0.99836	1	18556	0
CD2BP2	0.0038277	0.0029159	0.076495	718	4	-0.87001	1861	0.99617	0.99921	1	18733	0
SKIV2L	0.035199	0.036114	0.292019	2347	3	-0.86979	1862	0.94337	0.9814	1	17424	0
ZNF599	0.00052334	0.00025976	0.017181	286	3	-0.86924	1863	0.41126	0.62895	1	9167	1
TRIM39-RPP21	0.010036	0.011075	0.180451	1156	3	-0.86924	1864	0.89837	0.95943	1	16483	0
MAP3K7	0.0046493	0.0031614	0.077575	779	4	-0.86907	1865	0.98931	0.99788	1	18467	0
RPS29	0.27779	0.30717	0.681962	8558	2	-0.86888	1866	0.50361	0.67995	1	10125	1
MYEF2	0.060051	0.062752	0.371595	3227	3	-0.86858	1867	0.65201	0.77725	1	12082	1
SLC9A9	0.0059683	0.0047102	0.101699	883	2	-0.86789	1868	0.86433	0.94137	1	15865	0
COQ5	0.176	0.19771	0.6229	6058	3	-0.86753	1869	0.07583	0.24717	1	3134	1
WDR59	0.023427	0.027415	0.281442	1850	3	-0.86696	1870	0.88299	0.95079	1	16207	0
GTSCR1	0.012726	0.017046	0.249492	1306	3	-0.86668	1871	0.27152	0.54633	1	7516	1
TIMM17A	0.0087605	0.0061853	0.1085	1074	4	-0.86621	1872	0.99124	0.99836	1	18544	0
ORC1	0.053617	0.060313	0.367648	3070	3	-0.86563	1873	0.41192	0.62895	1	9171	1
METTL14	0.0028328	0.0023285	0.072864	598	4	-0.86547	1874	0.99717	0.99939	1	18794	0
VEZF1	0.010984	0.015173	0.237928	1218	3	-0.86525	1875	0.93473	0.97749	1	17243	0
SUCLA2	0.018494	0.022646	0.264604	1621	4	-0.86524	1876	0.98151	0.99556	1	18267	0
HMCES	0.0089989	0.0062206	0.1085	1090	4	-0.86505	1877	0.991	0.99832	1	18535	0
RIOK2	0.015607	0.020288	0.26245	1462	4	-0.86484	1878	0.98439	0.99646	1	18334	0
SMYD5	0.11118	0.12531	0.532862	4469	3	-0.8646	1879	0.89672	0.95943	1	16446	0
STRIP1	0.02572	0.029841	0.284674	1958	3	-0.8645	1880	0.67773	0.79824	1	12486	1
IL17RE	0.07503	0.085258	0.455862	3572	3	-0.86438	1881	0.86122	0.93939	1	15811	0
ALKBH8	0.0093272	0.0064935	0.111033	1113	4	-0.86422	1882	0.96918	0.99129	1	17937	0
MOG	0.025849	0.029841	0.284674	1964	3	-0.86396	1883	0.80755	0.90501	1	14861	0
ACP5	0.050416	0.055588	0.356768	2955	4	-0.86386	1884	0.94958	0.9841	1	17539	0
DNAJB1	0.13797	0.15746	0.580683	5120	3	-0.86346	1885	0.81719	0.91352	1	15046	0
ARPC1A	0.037321	0.038023	0.295525	2434	3	-0.86315	1886	0.90735	0.96426	1	16660	0
YAE1D1	0.051676	0.056404	0.357344	3006	4	-0.86293	1887	0.94832	0.98355	1	17509	0
ARAP3	0.014875	0.019856	0.26245	1419	4	-0.8625	1888	0.98513	0.99652	1	18357	0
SCAF8	0.030044	0.032587	0.287251	2149	4	-0.86231	1889	0.96996	0.99141	1	17953	0
RPS6KC1	0.070665	0.076781	0.422111	3472	3	-0.86194	1890	0.27615	0.54958	1	7614	1
TMOD3	0.0035173	0.0027118	0.073058	686	3	-0.86133	1891	0.59117	0.7374	1	11274	1
FUT10	0.14778	0.1653	0.583247	5359	3	-0.86131	1892	0.67234	0.79196	1	12408	1
CEBPE	0.041	0.045018	0.33008	2589	3	-0.86111	1893	0.75989	0.86283	1	13971	0
MME	0.025303	0.029388	0.284674	1935	3	-0.86049	1894	0.93825	0.9786	1	17316	0
DCTN4	0.031502	0.033313	0.287251	2209	3	-0.86047	1895	0.89703	0.95943	1	16451	0
TOR1AIP2	0.047421	0.05072	0.341351	2831	3	-0.86041	1896	0.83086	0.92386	1	15290	0
BUD13	0.12556	0.15167	0.580683	4816	3	-0.86017	1897	0.35102	0.60304	1	8572	1
TFB1M	0.14377	0.15997	0.580683	5265	3	-0.85993	1898	0.84456	0.93113	1	15509	0
MIOS	0.038564	0.03941	0.301329	2493	3	-0.8594	1899	0.56707	0.72688	1	10955	1
PPP1R2	0.0041103	0.0030516	0.076495	738	4	-0.85912	1900	0.99589	0.99914	1	18721	0
OR5M8	0.10105	0.11815	0.525599	4219	3	-0.85909	1901	0.27842	0.55406	1	7664	1
PTAR1	0.083336	0.098631	0.500353	3767	3	-0.85874	1902	0.79961	0.89796	1	14728	0
PTPN3	0.10777	0.12091	0.527271	4375	3	-0.85872	1903	0.87944	0.94774	1	16140	0
MRPL9	0.0013009	0.0007596	0.03358	422	4	-0.85842	1904	0.9987	0.99973	1	18894	0
BAG6	0.0058508	0.004373	0.096079	868	4	-0.85792	1905	0.97182	0.99226	1	18001	0
GEMIN5	0.052435	0.059967	0.367648	3037	3	-0.85759	1906	0.61114	0.74899	1	11538	1
FAM58A	0.0022006	0.0014594	0.051838	536	4	-0.85758	1907	0.9978	0.99958	1	18830	0
CRLS1	0.016149	0.021002	0.26245	1493	4	-0.85757	1908	0.96728	0.99094	1	17888	0
SRGN	0.016946	0.021208	0.26245	1540	3	-0.85755	1909	0.73691	0.84787	1	13528	0
TAF8	0.031331	0.033312	0.287251	2202	4	-0.85688	1910	0.96437	0.98949	1	17835	0
EGFL6	0.047511	0.050839	0.341351	2837	3	-0.85663	1911	0.92717	0.97399	1	17070	0
COL4A3BP	0.00403	0.003018	0.076495	734	3	-0.85585	1912	0.81541	0.9103	1	15010	0
TUBA1C	0.1492	0.1653	0.583247	5390	3	-0.85573	1913	0.64027	0.76793	1	11918	1
SCHIP1	0.078182	0.09083	0.475024	3650	3	-0.8556	1914	0.82284	0.91913	1	15136	0
PGGT1B	0.13989	0.15855	0.580683	5168	3	-0.85536	1915	0.44668	0.65298	1	9511	1
AAMP	0.0048206	0.0033686	0.079738	790	4	-0.85531	1916	0.99518	0.9991	1	18691	0
TARDBP	0.005616	0.004116	0.091074	855	4	-0.85498	1917	0.99438	0.99891	1	18651	0
IFI44L	0.035475	0.036328	0.292019	2358	3	-0.85479	1918	0.48048	0.66956	1	9872	1
BFSP2	0.0089004	0.0061859	0.1085	1085	4	-0.85441	1919	0.9911	0.99836	1	18537	0
LRRC49	0.034218	0.035502	0.292019	2310	4	-0.85421	1920	0.96578	0.99011	1	17862	0
RALY	0.13024	0.15294	0.580683	4929	3	-0.85346	1921	0.84659	0.93113	1	15537	0
ELP6	0.019327	0.023112	0.264604	1663	2	-0.85253	1922	0.22775	0.4842	1	6570	1
OSGEP	0.14012	0.15855	0.580683	5171	3	-0.85252	1923	0.9261	0.97348	1	17046	0
PSMD14	0.021893	0.025996	0.276679	1781	4	-0.85244	1924	0.97811	0.99458	1	18164	0
C12orf73	0.079186	0.093814	0.48402	3670	3	-0.85223	1925	0.93535	0.97749	1	17256	0
TNFAIP8L2-SCNM1	0.099136	0.1176	0.525599	4166	2	-0.85191	1926	0.92632	0.97373	1	17051	0
NUP107	0.12561	0.15201	0.580683	4818	3	-0.85166	1927	0.86076	0.93939	1	15799	0
NPC2	0.0038083	0.0029159	0.076495	716	4	-0.85163	1928	0.97109	0.99194	1	17983	0
EGLN2	0.052878	0.060312	0.367648	3046	3	-0.85138	1929	0.81266	0.90963	1	14958	0
ZC4H2	0.014936	0.019856	0.26245	1422	4	-0.85106	1930	0.98506	0.99652	1	18356	0
DNAJC6	0.077413	0.089626	0.472608	3623	3	-0.85099	1931	0.9448	0.982	1	17445	0
WDR24	0.00015864	8.8314e-05	0.008937	172	3	-0.85054	1932	0.35222	0.60304	1	8581	1
PHYKPL	0.049298	0.054801	0.356768	2909	3	-0.85052	1933	0.47607	0.66956	1	9821	1
RIOK3	0.076467	0.08669	0.458899	3604	3	-0.85034	1934	0.26891	0.54523	1	7461	1
KCMF1	0.025101	0.029172	0.284674	1924	4	-0.85011	1935	0.9749	0.99344	1	18076	0
ACTL6A	0.0010683	0.00066689	0.032519	391	4	-0.84947	1936	0.99788	0.99959	1	18836	0
TAF7	0.0020424	0.0013729	0.04991	520	4	-0.84892	1937	0.98142	0.99548	1	18263	0
KIF6	0.077733	0.090829	0.475024	3637	3	-0.84884	1938	0.94007	0.97969	1	17355	0
TUBGCP5	0.046464	0.050248	0.341351	2803	3	-0.84881	1939	0.4619	0.66225	1	9672	1
C16orf62	0.0006445	0.00033953	0.020603	315	4	-0.84805	1940	0.99936	0.99988	1	18949	0
TF	0.11175	0.12531	0.532862	4485	3	-0.84793	1941	0.76723	0.86994	1	14111	0
LRTOMT	0.045674	0.048872	0.336158	2771	3	-0.84789	1942	0.57401	0.72896	1	11042	1
RNF113A	0.11581	0.13342	0.556856	4566	3	-0.84787	1943	0.86162	0.93939	1	15819	0
SMG7	0.028874	0.031721	0.286696	2096	3	-0.84706	1944	0.72771	0.83685	1	13380	0
NDOR1	0.023372	0.027308	0.281442	1845	4	-0.84598	1945	0.97663	0.99416	1	18122	0
RYR1	0.038908	0.039852	0.303501	2505	3	-0.84592	1946	0.90444	0.96294	1	16605	0
GPN1	0.1341	0.15546	0.580683	5015	3	-0.84576	1947	0.67663	0.79721	1	12475	1
MRPL23	0.021673	0.025859	0.276679	1770	4	-0.8457	1948	0.97833	0.99474	1	18172	0
KIF22	0.062765	0.067451	0.38935	3287	2	-0.84529	1949	0.12076	0.32056	1	4170	1
COASY	0.0094268	0.0065168	0.111033	1117	3	-0.84492	1950	0.93524	0.97749	1	17255	0
EMC4	0.0055202	0.0039125	0.087573	846	4	-0.8449	1951	0.99448	0.99892	1	18655	0
POTED	0.14764	0.1653	0.583247	5355	2	-0.8449	1952	0.47189	0.66851	1	9771	1
PEBP1	0.021769	0.025859	0.276679	1773	4	-0.84487	1953	0.97823	0.99474	1	18169	0
RUFY3	0.011731	0.015653	0.238072	1254	4	-0.84469	1954	0.98827	0.99766	1	18435	0
TRPV6	0.036213	0.03677	0.292252	2389	4	-0.84466	1955	0.96379	0.98897	1	17822	0
CD86	0.037502	0.038187	0.295525	2449	3	-0.84377	1956	0.88846	0.95245	1	16298	0
ADM	0.082056	0.095203	0.485797	3741	3	-0.84372	1957	0.10646	0.30843	1	3841	1
FEZF2	0.009771	0.010952	0.180451	1136	3	-0.84313	1958	0.86762	0.94232	1	15922	0
CUL1	0.042542	0.04705	0.332284	2647	3	-0.84311	1959	0.80717	0.90501	1	14853	0
SKIL	0.010722	0.015063	0.237928	1201	4	-0.84288	1960	0.98928	0.99788	1	18466	0
SDE2	0.24934	0.2854	0.681962	7870	3	-0.84269	1961	0.39465	0.62377	1	8990	1
MRGPRX1	0.071703	0.083233	0.452947	3495	3	-0.84268	1962	0.6374	0.76793	1	11881	1
MAX	0.022259	0.026106	0.276912	1800	4	-0.84262	1963	0.97774	0.99458	1	18155	0
AWAT1	0.055005	0.060762	0.367648	3104	3	-0.84182	1964	0.93566	0.97749	1	17260	0
UBE2T	0.0001496	8.8314e-05	0.008937	165	4	-0.84171	1965	0.99837	0.99966	1	18874	0
DNAJB14	0.017824	0.022587	0.264604	1583	4	-0.84143	1966	0.98218	0.99562	1	18283	0
NPHS2	0.031427	0.033313	0.287251	2204	3	-0.84127	1967	0.93686	0.97772	1	17290	0
TPM3	0.060691	0.063239	0.372058	3240	3	-0.84094	1968	0.90423	0.96294	1	16598	0
DSC2	0.032528	0.034023	0.288144	2253	3	-0.84091	1969	0.35136	0.60304	1	8575	1
FGD5	0.21676	0.24709	0.666695	7053	2	-0.84084	1970	0.43263	0.64046	1	9374	1
WDR46	0.08321	0.098631	0.500353	3763	3	-0.84012	1971	0.75988	0.86283	1	13970	0
HBA1	0.029637	0.03231	0.287251	2131	3	-0.83969	1972	0.33432	0.59684	1	8429	1
CLDND1	0.038538	0.039409	0.301329	2492	3	-0.83964	1973	0.15615	0.38103	1	4934	1
TM9SF2	0.12904	0.15293	0.580683	4905	3	-0.83949	1974	0.58621	0.7374	1	11215	1
SLC16A10	0.13838	0.15818	0.580683	5134	3	-0.83922	1975	0.5693	0.72688	1	10981	1
SYT5	0.088979	0.1073	0.520833	3922	3	-0.83905	1976	0.83039	0.9233	1	15279	0
PDE2A	0.081175	0.094272	0.48402	3718	3	-0.83897	1977	0.82655	0.92156	1	15202	0
NUP43	0.092587	0.10981	0.52092	4017	3	-0.83892	1978	0.8063	0.90501	1	14834	0
RPP30	0.024869	0.028778	0.284674	1909	3	-0.83888	1979	0.56494	0.7248	1	10923	1
TIPIN	0.22825	0.26597	0.681962	7345	3	-0.83875	1980	0.8054	0.90429	1	14820	0
STK35	0.019345	0.023112	0.264604	1666	4	-0.83863	1981	0.98065	0.99548	1	18234	0
PCDHGA12	0.078136	0.09083	0.475024	3647	3	-0.8385	1982	0.64728	0.77103	1	12011	1
GAGE2D	0.023502	0.027415	0.281442	1855	4	-0.83837	1983	0.9765	0.99416	1	18114	0
TCEB3	0.0080918	0.0056498	0.104208	1029	3	-0.83771	1984	0.54384	0.70909	1	10643	1
STOML2	0.094173	0.11086	0.52092	4046	3	-0.83761	1985	0.72256	0.83273	1	13284	0
DCP1A	0.017139	0.021352	0.262478	1553	3	-0.83743	1986	0.89104	0.9537	1	16343	0
KMT2D	0.015092	0.020194	0.26245	1433	3	-0.83708	1987	0.66224	0.78354	1	12245	1
C11orf73	0.035977	0.036438	0.292042	2382	4	-0.83707	1988	0.96402	0.98935	1	17827	0
SCO1	0.04199	0.045908	0.332284	2625	3	-0.83707	1989	0.28246	0.55962	1	7748	1
THOP1	0.16047	0.17654	0.593392	5666	3	-0.83693	1990	0.15145	0.37065	1	4831	1
PQBP1	0.0070753	0.0053307	0.104208	954	4	-0.83663	1991	0.99292	0.99861	1	18609	0
FCER2	0.19348	0.22363	0.654291	6489	3	-0.83654	1992	0.90294	0.9619	1	16564	0
CHCHD5	0.045244	0.048552	0.336158	2757	3	-0.83615	1993	0.90818	0.96458	1	16675	0
TAPT1	0.00055648	0.00028203	0.018337	294	4	-0.8361	1994	0.98522	0.99657	1	18361	0
NOL11	0.19645	0.22743	0.654291	6567	3	-0.83592	1995	0.47477	0.66956	1	9809	1
OR5M9	0.019019	0.023111	0.264604	1649	4	-0.83581	1996	0.98098	0.99548	1	18249	0
PRR32	0.064589	0.070794	0.397751	3329	3	-0.83576	1997	0.9127	0.96747	1	16775	0
LHFPL3	0.090684	0.10877	0.520833	3970	3	-0.83529	1998	0.83617	0.92731	1	15375	0
ZDHHC8	0.01596	0.02081	0.26245	1484	3	-0.83512	1999	0.89081	0.9537	1	16341	0
[truncated: 17,115 more rows]

## Sheet: ReScreen Library sgRNA List
Gene	sgrna
AAMP	TGAGTGGCCTCTTGAAAGTG
AAMP	TGGATGTGGAAAGTCCCGAA
AAMP	AGGTGACCTCGCTATCGTCG
AAMP	AAGATGACAAAGCCTTCGTA
AATF	AGGCACTTAAAGCATTGTTG
AATF	AAACCACCTCTAGAAAAGCA
AATF	AGAAACTTTGACACTAGAGA
AATF	GAATATGATGAGGACGACCT
ABCF1	TGTAATTGCCCCTATAGTAG
ABCF1	CTGCAGAGGCCAAAGCACGG
ABCF1	GCAACACATCAATGTTGGGA
ABCF1	GATGGAGTATGAGCGCCAAG
ACLY	CGGTCACCTGTACACGACAG
ACLY	GACCAGCTGATCAAACGTCG
ACLY	GCCAGCGGGAGCACATCGGT
ACLY	AGAGCAATTCGAGATTACCA
ACTB	TCACCTGGGTCATCTTCTCG
ACTB	AAGAGCTACGAGCTGCCTGA
ACTB	GGATTCCTATGTGGGCGACG
ACTB	CGTACAGGGATAGCACAGCC
ACTG1	AGCTGTAGCCTCGCTCAGTG
ACTG1	CAACAGAGAGAAGATGACTC
ACTG1	ATGGAAGGAAACACGGCTCG
ACTG1	CTTCTACAACGAGCTGCGCG
ACTR10	ATTCGATAATCACAACTCGG
ACTR10	AATGAATTTACCCATCACTG
ACTR10	AAAAAGATATGGGTAACACC
ACTR10	AATGGATAGTCAACATTTGG
ACTR1A	AGTCGTAGCCCTCCTTACGC
ACTR1A	GAAGGTCTCGAAGAAAACTT
ACTR1A	CGCTACAGGCAGGACCACAG
ACTR1A	TGACACGAACGTGCTTGGGT
ACTR5	TGGGTAAAACATGCGTACAC
ACTR5	TCATTTGCCGTGAATACAGT
ACTR5	TGAGCACAGCTACATCGCTG
ACTR5	CGGGACACGCCCAGCCAGCG
ADAR	CGTTCTCCCCAATCAAGACA
ADAR	TTCTTGTAGGGTGAACACCG
ADAR	GTGCATACACTCAAGCAGTG
ADAR	AGGCAATCAACACCTCTCTG
AFG3L2	TTCCACTCACCTGAAAACCC
AFG3L2	TGTCGGAGAAACCACTGCCA
AFG3L2	AGGAAAAACTCCTGTTGATG
AFG3L2	GAATGAGACTCACTCTAGCA
AKIRIN2	TGTGCATCAGAAGTACAACA
AKIRIN2	GGGGACGCCGGGCTCAACAG
AKIRIN2	CTGGTGAAGCTGGTCCACTG
AKIRIN2	GCCGCAGAAGTATCTCCGAA
ALYREF	TTTCCCACCTGTCTCCACGC
ALYREF	GCTGTGCACTATGATCGCTC
ALYREF	AGACGTGCACTTTGAGCGGA
ALYREF	GCCTCGATTCACTCGCGCGG
ANAPC1	GTCCCAGCTCCAGTTACGGT
ANAPC1	GTTGTCTGGATGACTAATGT
ANAPC1	GATGAGACTCAACATTCTGG
ANAPC1	TGTCCATAACAGAGTCACCC
ANAPC5	AAACTTACTAGTGACCGAAG
ANAPC5	AAAAGCTCTCTGTTGAACAA
ANAPC5	GCTGAAAGAAAGCTTACTGT
ANAPC5	GAGGCTGTATGGCCGCAGGT
ANKRD49	GTAGGCTGCTCGATGAAGAG
ANKRD49	GGTACTCAAAGTCTTTGGGT
ANKRD49	TTCAGGAGCTCATTGCACAG
ANKRD49	AGAAAGGAGTCTCCGCACTG
ANKRD52	GTCAACCAGCCGAATGACAA
ANKRD52	GGCCATCATGAATGGCCATG
ANKRD52	CTGGACGTAAGGGACCACAA
ANKRD52	GATGCCCACTATGCACTGCA
AP2M1	CTTAAGGTATCGCACAACCA
AP2M1	GAGAGGGTATCAAGTATCGT
AP2M1	AAATGTTGGACCGCTTAACG
AP2M1	ACTTGCTGAGTCGCACACAC
AP2S1	ATCCTCATCCAGAACCGGGC
AP2S1	TGAGAAACAGAAGCTGATCG
AP2S1	GGCCATTCACAACTTCGTGG
AP2S1	CAAACACACCAACTTTGTGG
AQR	AGGTCCAAAAAACTTGACCA
AQR	ACGATTGCAAAAGAGTCTAG
AQR	CCCCTATTAGGAATAACATG
AQR	ACATCATGCTTACGAAGACC
ARHGAP29	ACAATCCCTACATTTCGTGG
ARHGAP29	CTTTAAGGGTAAGATCACAC
ARHGAP29	GAACACTGACTCTATCGAGC
ARHGAP29	TCATTATAGACTTTAAAACA
ARNT	TGGGGAACCTCACTTCGTGG
ARNT	CAAGCTAACCATCTTACGCA
ARNT	TGGATTGTGTTGGAGAGTGT
ARNT	AGATGTCTAACGATAAGGAG
ATG101	AGTGGAACTTGCCTGTGCTG
ATG101	TGACCGTCCACACTTCCCAT
ATG101	CTCCCCAACAACCTTGCGCA
ATG101	CACCTACTCCATTGGCACCG
ATG9A	TCAAGGCCGAGTACAAACGT
ATG9A	CCGTTTCCAGAACTACATGG
ATG9A	CTTCACATGTATGCTCATCG
ATG9A	TTGCCACGTGCAATACGGAA
ATP1A1	CCTGCCTCTTACCGTGACAG
ATP1A1	TGGTATTGTTGTCTACACTG
ATP1A1	GCAACCAGTTATGATTACAA
ATP1A1	ATCCATTCAGGAGTAGTGGG
ATP5B	GTTGGTGAGAGGACCCGTGA
ATP5B	GGTGGACGTCCAGTTTGATG
ATP5B	GCACCAATCAAAATTCCTGT
ATP5B	CTGCATAGTACCCATGTCAG
ATP5D	CAACAACTGCACCGAAGAGT
ATP5D	CCCATTCCCCCAGTGAGCAG
ATP5D	CGCAGCGCCCGAACCTGCGT
ATP5D	CCACGCCCGTGCCTATGCCG
ATP5I	GTAGGCCACACCGAGGAACA
ATP5I	AACAGATTACCTAAAACCTC
ATP5I	CGGTCACTCACTGTAGCGCG
ATP5I	CGAGGAACAGGGCGGAGTAG
ATP6V1D	GATCCTAAAGAAGATAATAG
ATP6V1D	CAAAGCAGTGGAACTACTGG
ATP6V1D	GAACTGACTGGTTTAGCCAG
ATP6V1D	CTTTAAACGAGCCTTCATGA
ATXN2L	TCCTCCTTTAAGATCCGGGG
ATXN2L	CAAACTGGCAGCCCCCCGGT
ATXN2L	CTAGCTCTTACCATCTGTGG
ATXN2L	CCACAATGTCCTCCCGACGA
BANP	CGCAGCGTACCCGCATCTCG
BANP	AGGCTGTGTCCAACCTCTCG
BANP	AGACGTGCAACAAAGTGCGA
BANP	TGGCGGTCAAGAGCTTCTCG
BAP1	TCTACCCCATTGACCATGGT
BAP1	GAACCGTCAGACAGTACTAG
BAP1	GTCCATCAAGACTAGCAGCG
BAP1	CACGGACGTATCATCCACCA
BCAS2	TTCAAAGGCAGAATAATCCG
BCAS2	TCACCGCTTCCCGCACACCA
BCAS2	AAAAAAATGACATTACTGCA
BCAS2	TTGAATTGCTCAGTATGAAA
BNIP1	CCATCACTGAGAGCCTCATG
BNIP1	AGAGATTGTCAAATTTGACC
BNIP1	CCAGCAATCAGGCCTCATGG
BNIP1	GTTGCGTCACAGAATACAGG
BRAT1	ATCCCCACCACCGTACCGTG
BRAT1	GACGGCAGACGATGCCACGA
BRAT1	CCACGAACGAGTGTGCGGCG
BRAT1	AGCCCGCCAGGGTCCCACAG
BRCA1	AGAAACCTACAACTCATGGA
BRCA1	AAGGAGCCAACATAACAGAT
BRCA1	GGCTCAGGGTTACCGAAGAG
BRCA1	TGGTACTGATTATGGCACTC
BRD4	AGTCGATTTCAATCTCGTCG
BRD4	CCAGACCCCTGTCATGACAG
BRD4	CACCAAACTCCTGAGCATCA
BRD4	AGTCGAACTGTCACTGTCCG
BRF1	GAGGCAGGCAGCAATCACGT
BRF1	TGTACACCTAGGCTCCACCG
BRF1	AAGCGTGGAATATACAGGCA
BRF1	AGTCCTGTCAAAAAAACTGG
C12orf45	CTGTACCTGGTCCAATACTG
C12orf45	CTGCTGACGGCGGGAAGCGA
C12orf45	TCAATATTGAAACGACCAGG
C12orf45	TCATAGTAAAGTTATACAAA
C19orf25	CCTACGTGGCTGCCAACCAG
C19orf25	AGTTCCCTTCAGGATGATGG
C19orf25	CAGATCCTGGAGGATGTGCG
C19orf25	CGGGCTCCCCCTACCTTCCG
C19orf43	GTGAACTTGTTCGCCAACGA
C19orf43	GCTCCTTACGAAGCTAAGTG
C19orf43	TCCGCAGCGACCCGACCAGT
C19orf43	CTGGCCCCGGGGATCCGAAG
C1orf131	AGGCTCGTTTAGAAGTGCAC
C1orf131	GTTCTCTCATAAGAGGCCAG
C1orf131	CAAGGATCTCTGGTCCTGTG
C1orf131	ACATCTCTCTCCAAAACACT
C2orf44	GGAAGCCACTGCCACTACGT
C2orf44	ACTGATTTGCGGCTTCACAG
C2orf44	AAGGCAGACATCAACACCCA
C2orf44	CTTCCATTGGATAAGATCTG
C7orf26	GTCATAGAGCGCGGTAACGG
C7orf26	TAACCTCACACAGTAAACCA
C7orf26	AAAGTGATGAGAATCAACCT
C7orf26	ACATGGCCATTGGATAAGGG
CAB39	TGAGCTACTGCTTCTGTCTG
CAB39	GTGCAGATGTATTCAACAGT
CAB39	CCAGAAATAGCTCTAAATTG
CAB39	GAGCTGTAAATCAGCTACCA
CARTPT	GAGTAGATGTCCAGGGCTCG
CARTPT	TGGGCACGGGTACCCAACAG
CARTPT	ACCGACCAGCTCCTTCTCGT
CARTPT	CCTGGACATCTACTCTGCCG
CBWD5	TGGTTAGTTACCTAAATACC
CBWD5	TGAGGAAGAGGATCCTGCGG
CBWD5	TGACTGGGATCTTGGCGCCG
CBWD5	GGCTGTTGGATCTGTGGATG
CCDC174	ATCTGGAGCAAACAGAATGT
CCDC174	GAGGCCCGGCAACTTGGTGT
CCDC174	AAACATAAAGGAAAAGCGAA
CCDC174	ACTTCAGCGCCAGCAATGGG
CCNL1	TGCAGGTGGCGATGGCAACG
CCNL1	TAGTTCTGATCAAGGATCAG
CCNL1	ATGTGAACGTAATCAAACCC
CCNL1	GATCAGGATCCCTCCCGTCG
CCS	TGGATCTCATTCCAGCACCG
CCS	CGTCAATAGTTCCCTCGATG
CCS	GGTGCGCAAATCCCTGCAAG
CCS	ACTCCACGTCCATCAGTACG
CCT5	TGATTGCCATCGCAACAGGA
CCT5	AATACAATGAGAACATCACT
CCT5	TCAGACAGCAAAAACCACGC
CCT5	CACCCAATCAGAATAGCCGA
CCT6A	ACGTGCTAAGGACCAACCTG
CCT6A	CAGGGAAACACTTATAGATG
CCT6A	CTAATGACACGTTACAAGTG
CCT6A	CATCCTAGAATAATCACTGA
CCT7	GCAGGTGAAACCCTATGTGG
CCT7	GATAAGAGTCCACACAGTTG
CCT7	ATAAGCTTGTCCATGCCACG
CCT7	CTTGTCCAAACTCCCCATTG
CCT8	AAGCTTATTGCTCAGGCATG
CCT8	AGACTTCATCAATATCTCGA
CCT8	CTTTGACTTGTGCATCCATG
CCT8	CGAAGACTTTGTAAAACTGT
CDK6	TGGCTCACCTGACCACGTTG
CDK6	AACACTCCAGAGATCCACGG
CDK6	GCCCGCGACTTGAAGAACGG
CDK6	CATTGCAGGTCGTCACGCTG
CDKN1B	AGTTCTACTACAGACCCCCG
CDKN1B	GGGCAAGTACGAGTGGCAAG
CDKN1B	AATCGAAATTCCACTTGCGC
CDKN1B	TGGACCACGAAGAGTTAACC
CDS1	TGGGCTATTAACAGTTCGCA
CDS1	TGGAAAAACTGGTGGATACG
CDS1	TAACACTTGATATTGGAACA
CDS1	AATGAATCCAAACACAACTG
CENPC	AAGCCACAAACAGATCAGGT
CENPC	AAAAAACAGATGCCACCTGT
CENPC	ATCAACTTCGTATCATCGGG
CENPC	GCGTCCATCTGATTGGTGGG
CENPM	CCCCAGTCTCCAGAACACAG
CENPM	GGCTACTTACACCTTCAGCT
CENPM	AACACGATCAGGTCAATTCG
CENPM	CGTACTTACCACCTGTGGCG
CEP192	TGCTGGGAATAGGAGTACAC
CEP192	AGGGAGTGTCCGAGTGCCCG
CEP192	GTTTCACATCAATAGCCCTG
CEP192	TCACCACTGGAACAAGCACA
CFLAR	CCACATCTATAGCAACATCC
CFLAR	ATTACCTATAGTCCGAAACA
CFLAR	AAGAGGTAAGCTGTCTGTCG
CFLAR	GGGCCGAGGCAAGATAAGCA
CHD8	CTGTCTTCTACACTACCGTG
CHD8	ATGAGAAATATAATACCATG
CHD8	CTTTAATCCAGACTACGTAG
CHD8	CATACCTCGAGTCTTAAATG
CHMP3	ACATGAACTCAGTGCTCATG
CHMP3	GCCCTTACCAGTTCTTTGGG
CHMP3	GTTGTTGACAGGCAAATAAG
CHMP3	GTTGTCCAAAGAAATGATGA
CHMP4B	GAATGCCAACACCAACACCG
CHMP4B	CACGGCACCAAAAACAAGCG
CHMP4B	GGGCGGCCCGACCCCCCAGG
CHMP4B	TATCAACCATCGAGTTCCAG
CKS1B	CAGACATGTCATGCTGCCCA
CKS1B	TTCGGACAAATACGACGACG
CKS1B	TTCAGATTCAGACATCAGAT
CKS1B	ACGACGAGGAGTTTGAGTAT
CLSPN	TAGATGTTTCCATTAAACCA
CLSPN	AACTACCTATGACAGTGCCG
CLSPN	GCAACAGACAAACAGGCCGT
CLSPN	TGACATTAGACCTTCACCTG
CNOT1	ATGGCGCAAGGTATGCCAAG
CNOT1	TTTCTTAAGACGCTGCGCAG
CNOT1	ATGTCGTGGTAGCTGTACTG
CNOT1	TGCAATTGGCTACCATGGTG
COPE	CTACCAGCAGTGCATAAACG
COPE	ACTGCAGAGGAAGTTCGGTG
COPE	CTATCTCCACGACCAGAACC
COPE	GTAGTCAGCAAACATGCGCA
COPG1	GGGAAAGAAGACAACTACCG
COPG1	ACATCTGTGCGAGTTCATCG
COPG1	CCAGTGACCTGACACAGCCG
COPG1	TCATCTTATTGACGGCTAGG
COPS4	GATTGCTAGGCTATATCTGG
COPS4	AATTCATTGAAGCTGCACAA
COPS4	TCCTCAAATGAAATGACTCT
COPS4	TTGTAGGTATCGTCAGATCC
CREBBP	CCGCAAATGACTGGTCACGC
CREBBP	ATTGCCCCCCTCCAAACACG
CREBBP	CTTAGCCCACTGATGAACGA
CREBBP	CAGGACGGTACTTACGTCTG
CREM	GCATATATCAGACTAGCACG
CREM	TACTGTACAATTGTAGCACC
CREM	TGCCTACCTGAGCTAAAGCA
CREM	ACAATCCAGATTTCTAACCC
CSHL1	AGAGCTTATAAACTCCTGGT
CSHL1	TATTCCGACATCCTCCAACA
CSHL1	TGTTGGTGAAGGTACTCCTG
CSHL1	GGAAGAAGCCTATATCACAA
CSK	TCTTGCCGTGGAACCAACTG
CSK	TGATGCTGGGCGATTACCGA
CSK	CATTAAACCAAAGGTCATGG
CSK	CGCACAGCGTGTAGTCTCCG
CTC1	TCCCCAACACATAGAAACTG
CTC1	GAAGCAGAACGGCGCCACGG
CTC1	ACTCCAAACCTATCAGCCGT
CTC1	CTCTATGTGAGAGATAACAC
CTU1	GTGCTCATGAACTTCCTACG
CTU1	CGATGTGCGTGGCTCCCACG
CTU1	GCCACCGATGCCCTCATCGA
CTU1	GGGCTGGACGATGGACGCCG
CUL3	GAGCATCTCAAACACAACGA
CUL3	ATCCAGCGTAAGAATAACAG
CUL3	ATAACTTGTACATGCAACCA
CUL3	GGTGTATTAGGGATCATCTA
DCAF13	ACCAAGTTGGACTTACAGAG
DCAF13	CCTATATGTTCAATGACCTG
DCAF13	CCAAGCAATTGACTCCATCA
DCAF13	ATTACATACAATATTAGGAA
DCP2	GTTCAATCTGAAAACACACT
DCP2	ACACCAGGATTACCTCAGTG
DCP2	CACGCCGGCTAAACCCACTG
DCP2	TGTAGGTACTACTAGTTCAG
DCTN1	AGATCCGAAGGCGAATGCCA
DCTN1	CTGAAGACCCTACCTCACCA
DCTN1	GGCAAAGGAACGCTATATGG
DCTN1	CTGCTCATAGCGGTGTAGCG
DDX18	TGATAAAGCGAATGCAACAG
DDX18	GCCACCCATTATCAAGCCAT
DDX18	AAACAAAAGCCCATGAATGT
DDX18	CTGATCGTATCTTGGATGTG
DDX20	AAGCAGCAGTGACTCGAAGT
DDX20	TTCAATTCAAGACTTCTCGT
DDX20	TTCAAGCTAAATCTGGCACC
DDX20	GCAACGTCACCAAAAGAACT
DDX27	GCAACTTGTCACAGACGCAG
DDX27	CGGATCCGGCCTAATCGTGA
DDX27	CTTAATCGGAACCATAGGCG
DDX27	TGATGAGTAGTCAGTCTCCG
DDX52	TGGCTGGCAAGTTCTCGTGT
DDX52	TTATTAAAGCAAGATCCCCC
DDX52	TCAGTGTGTCCATTGGAGCA
DDX52	AAACACAAAATTCACGTCCA
DDX6	AGGTCTAGCCGTTCAAGTAA
DDX6	TAACACTTACTTAATAGTGG
DDX6	TACACTAAGAGGGAAAGTAG
DDX6	ACGTGGTGATTGCTACCCCT
DGCR14	GGACGAGGAAGAGTATATCG
DGCR14	CCTGAGCCGCTACACGAGTG
DGCR14	AGCCACATTTGAAACCCCTG
DGCR14	TCCAAATCCACCCACTCGAG
DGCR8	AGACAAGGGATGCTACTCAG
DGCR8	GTGTGCAAAGATGAATCCGT
DGCR8	ATAGAGTCAGGCTCATCCAG
DGCR8	GCTGCCAACATACCTCGTAG
DHFR	CGGCCCGGCAGATACCTGAG
DHFR	GTCGCTGTGTCCCAGAACAT
DHFR	GACATGGTCTGGATAGTTGG
DHFR	AACCTTAGGGAACCTCCACA
DHX38	CCCACAGGAGGATTACGTGG
DHX38	ATCGAGACTATGACCGCAAG
DHX38	TCAGCGGAGACAGATCAATG
DHX38	CCGATGACAGAAGACACTTG
DIEXF	AGTAAAACGGGGCATAGAGT
DIEXF	AGAATATGGATCAGATCCCG
DIEXF	GGGACCTGTTCTACCCGGAA
DIEXF	TGGTGGTAGCGATGTCAGTG
DIMT1	AACAGCATTATCGATAAGGT
DIMT1	TTGCTTGTGAACTTGACCCA
DIMT1	CAGGACTCATGTTCAACACG
DIMT1	CTTCAGACCACCGCCCAAGG
DIS3	TCGGATGCGTTTATATACGG
DIS3	GATATTACCACTAGTCTCCG
DIS3	GTGTTCCTTAAAATGTGACG
DIS3	ATTTGTAGTGTAGACCCACC
E2F7	GTTACAATGGACTCACAAGA
E2F7	ACAGACAGCAAGCGGAACCA
E2F7	GAACATTGGCTATGTCATAG
E2F7	GCAGAGGGCACATACACTAG
EAF1	ACCGCGAGGAACATTGCCTG
EAF1	CTGACTTACAACGAATAGTG
EAF1	CTTATTATTAATCATGACAC
EAF1	GGAGCTCTGAATGGCATAGG
EGLN1	CGGACAGCAGATCGGCGACG
EGLN1	GACTCGTCCAAGGACATCCG
EGLN1	ATGCCGTGCTTGTTCATGCA
EGLN1	CCCCCCAAGCAACACGCCCG
EIF1AX	CTCCCCGCTAGAGTATGCTC
EIF1AX	AGGAGGTAAAAACAGACGCA
EIF1AX	GTAGGTTTGGATAAATACCT
EIF1AX	AAGAGGTTATGTCACATCAG
EIF2B4	ATAAACTAAAACCCTACATG
EIF2B4	CTGCAGGCCGAGTCGCACCA
EIF2B4	GTATCTGCAGCCCAATGTCA
EIF2B4	AGAAGTAGGTCATCAACCTG
EIF2B5	TCCCGGCACAACATCTACCG
EIF2B5	CCGCCCTACATCTCTCAATG
EIF2B5	TGTGGATAGTACCACAAACA
EIF2B5	CGAGTTCAGTGATGATTCTG
EIF2S2	CCTCCACAAGTCGTCCGAGT
EIF2S2	AAGAGACTACACATACGAGG
EIF2S2	TCAAGAACCAACTGAACCAG
EIF2S2	GAAATACTAGAGAAAGATGA
EIF5B	CGTCACACACATGTACAAGA
EIF5B	TTGATAGACTCAATTGTCTG
EIF5B	GCTGTAGAAGTTATGGAACA
EIF5B	CGAAAGTGGAAATGTACTCT
EIF6	CGATAGACGCGTGCACCACG
EIF6	TCCGATCGCTACCAGACAGT
EIF6	AGACACAGTGCAGATTAGGC
EIF6	GGCCACGTAGTCATTGCAGG
ELP4	CCAGTTATTACCCAAGATGG
ELP4	AATGCCACAAGAACTAATTG
ELP4	GCCAGCGTGACCAACGACAG
ELP4	CCAACGGCTAAACCTCCACC
EMC3	AAGAAAGTGATGATAACGAT
EMC3	GTAACATAGGCTTAAAACGG
EMC3	CACCAATAAGAATCATAGGG
EMC3	AACATACCAGTCATAGGAGA
EMC7	GAGATCGCTTCAAGATTGAG
EMC7	TTCTCCGTCTACCAGCACTC
EMC7	TTTATTAAAAGGGAATCGTG
EMC7	CGAAGTGATATCCACTCGAA
ERCC3	AGGGCATGCTTACCACCCAG
ERCC3	AGCGGCATTCTCGGATCACG
ERCC3	CAGTCAAACCCAGCTTACAG
ERCC3	GGGTAAATCTGACATCCCCA
ERI1	CAGAGCTGATACCTTCCCTC
ERI1	CTGTATTAATAGAATGAGTA
ERI1	ACTGAAGTCACTCGCACTGG
ERI1	GCCGCCGCGTCCCAGTCCCG
EXOSC9	AGATTACGGATGCTGCATTG
EXOSC9	TGAACGAGAAGAACGTGTGA
EXOSC9	AAACTCAATCGGGCAACAGA
EXOSC9	TGACACAAATGGGCATGTGG
FCHO2	AACCATTCAGAGCATAACTC
FCHO2	GCTGCCAATACTCCAACAGT
FCHO2	TCAAGAGATGGTCCAAATAG
FCHO2	TTGCTGAGTCAAAAGGCACT
FDX1L	CCCAGTGAGTGGCAGAGTCG
FDX1L	GTGGTGTTCGTAGACCGCTC
FDX1L	GGCAGCCTGCAGTAGAACCC
FDX1L	TTCACTCACATACACATGGC
FEN1	TCTCCATCATGCGAATGGTG
FEN1	GACTACTGTGAGAGTATCCG
FEN1	TCAGGTGTCGCATTAGCACA
FEN1	TTATCTTGATGCACCCAGTG
FNTA	ATGCAGCCAATTATACAGTG
FNTA	ATAGGCGAGTATTAGTGGAA
FNTA	TCACAAACCCGTCGTCCATG
FNTA	TGTGGACCAACTTCTGAAAG
FNTB	AGTAGAAGAAAAGATCCAAG
FNTB	TCGGGCCTCAGACTGTACAG
FNTB	AGGATCCAATAGCAGAGCCA
FNTB	CACAGAAGGTATAGCCACCA
FPGS	TAACTCACCGAGCCGCATGT
FPGS	TCGGAGGATACATTCCGTGA
FPGS	ATACGGTGGAGAAGATCGCA
FPGS	GGGTGACCCTCAGACACAGT
FRMD6	GGAAGCTCATATACTACACG
FRMD6	TGACTCTTGGATTGACCATG
FRMD6	CAAGATGGGAAGTAAGCCTC
FRMD6	CCAGCTGGAAAAACGGTCGC
FRYL	GTTGTCCGAGGAACTAGCAA
FRYL	GAAGTGATGCGATAATACGG
FRYL	AGTTTGATTGGTGACCGACG
FRYL	ACTGACGGCTAGTCTCCTAG
FTH1	TCTTCAAAGCCACATCATCG
FTH1	TGTTCACCTTGATATCCTGA
FTH1	GGAGAGCGGGCTGAATGCAA
FTH1	CACCATGGACAGGTAAACGT
G3BP2	GAAGAAACAGTACCACTAGG
G3BP2	AATAGTATGCTTACGTCACA
G3BP2	AAGCTCCGGAATATTTACAC
G3BP2	CAACGACCTAGAGAACGACC
GAPDH	TGCTGGCGCTGAGTACGTCG
GAPDH	CTGTAGGCTCATTTGCAGGG
GAPDH	TCACACCCATGACGAACATG
GAPDH	ACTGTGGCGTGATGGCCGCG
GAR1	GGCCTTTGTTAAAGCCTCCG
GAR1	AGCAGCAACCACTTCCGAGG
GAR1	ATACAGACTACACGTTCTGG
GAR1	GGTCGTGGAGGCTTTAATCG
GATC	GTCCACGGCGCGTAGCCGGT
GATC	ACGCGCCGTGGACACAGACG
GATC	CCAGTCGCGCCACTGCCTCG
GATC	CTTTACCTGAGGATCCGCCT
GEMIN7	GTGAGCTTCACGTTGCACGA
GEMIN7	GCGGAGGTAACGCTCCCGAA
GEMIN7	GCTCACCTGATGACCCACCA
GEMIN7	ATGGACGCAGAGCCCCCTTG
GFER	GTTTAGGGAGGACTGCCCGC
GFER	CCACGTCTTGAAGTCGACGC
GFER	CTCGGCGACAGGAGAATCGG
GFER	GACCTGGCGACCGACGCGCG
GLE1	TGAGCACCGTCACAGAGCAA
GLE1	TACAAGACATTACAATGCAG
GLE1	TTCCACTTTGATCCCCCGTG
GLE1	GTTCAGATGCCATCTCCGAG
GLTSCR2	GGCCCAAGAAATAAGAAGCG
GLTSCR2	CCTCTGACAACAAGCCACTG
GLTSCR2	AACTCATCCTGGCCAACCAA
GLTSCR2	CTGGGACACTCACTCTTTGG
GMPPB	GTGTCCAATAAGATCAACGC
GMPPB	CACCTGCGACATGTAGCTCA
GMPPB	GGAACCCTCCAAGTACGGTG
GMPPB	CTATATGCCATGGAGTTACA
GNAI2	CCAGAGCCTCCGGATGACGC
GNAI2	CTTTGCCGACCCCTCCAGAG
GNAI2	GGACCCGCGTAAAGACCACG
GNAI2	GCTTCATGCTCTCATGCATG
GNL3	GTAATGTTGGTGTATCCATG
GNL3	ACTTCGCAGAGCAAGCGCAG
GNL3	CAACACCTCTAGGACAACAT
GNL3	GAAGAAAGAATTGCCAACAG
GOLGA6A	CGGTGGTTGCCACTCACCTG
GOLGA6A	GGCTACGCAAACAGGAGGAG
GOLGA6A	TTCCTTGCTAAGGAGACTCA
GOLGA6A	TCTGCTGTAACCACCGCTGG
GOSR2	CCACGAGATCCAGTCTTGCA
GOSR2	CCAGAAAGTTCACAACGGCA
GOSR2	CTCTGACACCACCATACCAA
GOSR2	AAATCTCCAGACGTTCTAGA
GOT1	GGAGGTGTGCAATCTTTGGG
GOT1	GTTGGTGAGGACACATAGAC
GOT1	AACTGGGATTGACCCAACTC
GOT1	CCATTCTCCAGCATATCGCA
GOT2	ACTCCCAGAATGGGATCTGG
GOT2	AACAGCGAAGTCTTGAAGAG
GOT2	GTGCGCCACTTCATCGAACA
GOT2	GGACGCGGGTCCACTCCCGT
GPI	TGACCCTCAACACCAACCAT
GPI	TGGGAGGACGCTACTCGCTG
GPI	TGAGAAGATCAACTACACCG
GPI	TTGGAGACATACCAGACGCG
GRWD1	GTGGTCACCGACTGAGAACA
GRWD1	TCCTCCCCTTCGCGTAGCGG
GRWD1	TTCGGATGCACAATCTGCAT
GRWD1	CTCTGGACACCTACGGACGG
GTF2E2	GAAACAATGGCTAATGACTG
GTF2E2	TGATAGACACGGCATCAGCG
GTF2E2	AAAACAAAGGTAGAACATGG
GTF2E2	CTGATCTAAGAGCCTAAGTA
GTF2H3	CAAATGCATAGATGCCGTGA
GTF2H3	AGACATTCATAGAATGAACA
GTF2H3	GATGCCAACCCAATTTGGTG
GTF2H3	CTGTTGGAGGAGCCCTGAGT
GTF2H4	TTTGTCTCTAGTACTGAACC
GTF2H4	ACAATCGGTCCAATACCCCA
GTF2H4	CTCCCTTGACAAGTACGCCG
GTF2H4	GAGATTGATGGCCAGGCGTG
GTF3C1	CATGCCGCTACTTTAAGGAG
GTF3C1	TGTATGTCGACGATGCCTCG
GTF3C1	GAGGCACCGAACCATGACGT
GTF3C1	CCTCACTGTCCGACTCAGAG
H3F3A	TCTGGTGCGAGAAATTGCTC
H3F3A	ACTGCCCGCAAATCGACCGG
H3F3A	TCTCGCACCAGACGCTGGAA
H3F3A	AGAGGGCGCACTCTTGCGAG
H3F3B	ACTGCTCGTAAGTCCACCGG
H3F3B	TGCGCTCTGAAACCTCAGGT
H3F3B	GAAGCCTCATCGCTACAGGT
H3F3B	AAGCGCTCCCTCTACCGGCG
HAUS3	TCTTCACAGCCTAACCAGCA
HAUS3	CAGGCAAGCCTATTCTAGAA
HAUS3	CCAGTTATTGAATATGCCAG
HAUS3	AATTGCGATAAAAATACCAG
HAUS4	TCCCCGCCAACCTCTGAGAG
HAUS4	TGCTGACAGTGAAACCGTGA
HAUS4	TGCTTGTAACTGAACTGATG
HAUS4	CTTAAGCCTCACCCTAGCAA
HAUS8	CTTAACAGCAGATAGCAGTG
HAUS8	GCTCCCGCTTCCTCTGAGAG
HAUS8	GCAATACAGGACATTCGCCA
HAUS8	GCTGACGCTACTATCCGTAA
HDAC3	TGGGTCAATGCCAGGCGATG
HDAC3	ACCTGGAGCACAATGCACGT
HDAC3	TCATCAATGCCATCCCGCAG
HDAC3	GTCAGCCCCACCAATATGCA
HEXIM1	GGGTGCCCGAGGAGGACAGT
HEXIM1	CCTCAAACTAGCAACTGTAC
HEXIM1	CATGGATGATCACGACCAGG
HEXIM1	AGAAGTGGAACCGACGCCCG
HIF1AN	AGGCACTCGAACTGATCCGG
HIF1AN	AACTGGATTAATAAGCAACA
HIF1AN	CAAACGCTCAATGACACTGT
HIF1AN	GAAGCTATAACTGCGCAACT
HIST1H2BI	ACACGGAATAGCTCTCCTTG
HIST1H2BI	CTCGAAAATGTCGTTGACGA
HIST1H2BI	GCTTGTTATAATGCGCCAGG
HIST1H2BI	GCATCTCGTCCAAGGCTATG
HNRNPC	CTCATTAACATACTGAACGA
HNRNPC	AAATTCACTTACCTAAAACC
HNRNPC	TATCAGGAAACACTTCACGA
HNRNPC	AGGTGTGAAACGATCTGCAG
HNRNPL	GGTGGAAGCAGACCTTGTGG
HNRNPL	ACTCAGTTCAAAGTGCCCAG
HNRNPL	TGCCCTCACCATATTCTGCG
HNRNPL	AGGATGGGTCCACCAGTGGG
HSPA8	AAATCGGGCACGGGTAATGG
HSPA8	GAAACATTGGCCCTTTATGG
HSPA8	TGGTGGTATTACGCTTGATG
HSPA8	AAACCAACCTCACCTTCCCA
HYPK	TCTGTCTCCAATCACAGACA
HYPK	AAATAGATATGGCGACCGAG
HYPK	AAGCCACGGAAACATGACAG
HYPK	CTGAGACCAGTGGACCAGAG
IER3IP1	GATGGCGTTGACGCAGAGCA
IER3IP1	TGCCTGCAGCAGTGAGTACA
IER3IP1	CTCCTCGTGCAGCACTGCGA
IER3IP1	TTACATTATACAGTTGGCTG
IGBP1	CACCAAAAGGTACTTCAGGT
IGBP1	AAAGACAGGCTAAAATACAG
IGBP1	GAAGTGGCGACTGAACCCGC
IGBP1	ACTCTGCCACATGATAGCAA
IKBKAP	AATGGTGAATGACAGACCGG
IKBKAP	TGGACGACTGACCGGAGCGT
IKBKAP	GATTTATGATCATAACCCTA
IKBKAP	CAGCAATCATGTGTCCCATG
INTS2	GTACAGACGTAAGAGTGCAC
INTS2	AGCACAAGACGCAATCGACG
INTS2	TCTGGATTAGATTTCGACGC
INTS2	AATGTGGGTAGTTAGTAGCA
IPO13	GGAGCTCTTCGACAGCAGTG
IPO13	CCTAGGGCATGCAGTACCAA
IPO13	GTATGTCTATGAGATGTTGG
IPO13	AGTACCGCAAAGGCCTGGTG
JUN	GCTCTCGGACGGGAGGAACG
JUN	GCCCCACGTCGGGCGAGGTG
JUN	TGAACCTGGCCGACCCAGTG
JUN	GGCGGCGCAGCCGGTCAACG
KANSL1	GGAAGCAGTAGATTATCACC
KANSL1	CTGTACTGAGCTGTAAGAAG
KANSL1	ATGAACACAAGAGTCCAACT
KANSL1	TCACTGTCTACCAAATCATG
KANSL2	ACTGTGGATCAGACATGGAG
KANSL2	ACAACGAACATCATCCACAA
KANSL2	TGAGTGAATGCACAAGACAG
KANSL2	ACATGTCCGTAGGAATGCCC
KAT5	ATGAATGGGTGACGCATGAG
KAT5	GGGTACGGGGAGAAGTACCA
KAT5	CTGAGGGTACCGTTGAGCGG
KAT5	GATCTGGACCGGGATTGGCA
KCTD10	GCTTCCCACAGCGGTCAATG
KCTD10	ACAACAAATACTCATATACC
KCTD10	TGTCTCTGCGCTTTAACGGA
KCTD10	TCTGCATGGTGGTATAGTAG
KEAP1	CAGCACCGTTCATGACGTGG
KEAP1	CCTGGAGGATCATACCAAGC
KEAP1	AGTACGACTGCGAACAGCGA
KEAP1	ACAACCCCATGACCAATCAG
KIAA0100	TAGTATCTTCAACTTCAAGG
KIAA0100	ATGGATCTGACTCGGCACAG
KIAA0100	CTGTGCGATTGCTATGCCGT
KIAA0100	AATATGCCATAAGGACTCAG
KIAA1429	GACATATGATCCATATGACA
KIAA1429	ATGTTAACGGAACTCCTGAG
KIAA1429	AGTGCCACTGATATATCATG
KIAA1429	TGTCGTGATCAGGTTCACTG
KIRREL	CATCGTGCCTCGAATCGGAG
KIRREL	AATAAGCAGTTGGCTCACGG
KIRREL	GAGTCGCTATGAGACAAATG
KIRREL	TGGAACGCTATACAGTGGAG
KRT18	CAGCTCTGGGTTGACCGTGG
KRT18	GCTGGCTCGGAAGAACCGAG
KRT18	TGTCAATCTGCAGAACGATG
KRT18	CAGACCCCCGGCTATCCCGG
LAMTOR2	ACCAGGCTGCTGAATAACGA
LAMTOR2	AGTGTCCCCGTAACCAGAGT
LAMTOR2	TGGGCCGCCTACGACCGGAA
LAMTOR2	TGCCATAGCCAGTAACATCT
LARP1	AACCTAAAGACACTACCCAA
LARP1	TGTGAATAATCCACTATTGG
LARP1	TAGTGAATACTACTTCAGCG
LARP1	AGACACATACCTGCCAATCG
LAS1L	GTGACGACCATAAGTTGCAG
LAS1L	GCTTTGCAGATAGAATATGA
LAS1L	CAGGACACATTCTACACGTG
LAS1L	TTGTGAATCTTATCTCAGAG
LETM1	GTCACGGAAGACCGCCTGAG
LETM1	ATGGATCGACACCAAGATCG
LETM1	GCGCTCTCGACACTATGCGA
LETM1	ATTTGAGACTCAGTCACTCA
LIN9	TAGAATGGGGAAAAATTCGG
LIN9	ATAAATGGTGTATATACGAG
LIN9	GGAGGAGTATAATGTAACCG
LIN9	AAGGAAGCTTATCTAACACG
LMNA	AGTTTAAGGAGCTGAAAGCG
LMNA	GCTGACCACCTCTTCAGACT
LMNA	GCGCCGTCATGAGACCCGAC
LMNA	TCTCACTCATCCCAGACACA
LSM11	CCCCTGCTTCAACAACGTGG
LSM11	ACTCCATCGCTGTATCCGTG
LSM11	AGAACTTGTCGAATGCAACA
LSM11	ACCTACCGAAAACCTGTCCT
LSM4	ACCACTGAGTACTCACCATG
LSM4	AGGACGGGGACAAGTTCTGG
LSM4	ATGCCCGAGTGCTACATCCG
LSM4	GATCATCGACATGGTCAAGG
LSM5	AAAGGACGGCGATTACCTAA
LSM5	CATCGTGATGAAGAGTGATA
LSM5	GAGCTTGTGGACAAATGTAT
LSM5	CCAAATTTCAGATATGGTAC
MAEA	ATAAGAGACTGGACGCTGTG
MAEA	GCGTTGCGGCTACTACAACA
MAEA	CCAGGAGTACCCGACCCTCA
MAEA	CGCACGCCCTACCTTGTACG
MARS2	TTGCCTTAACCGCTATACCG
MARS2	TTTCCTGTATCTCTCGAGAG
MARS2	CGCCCTTGTAGAGCAGACCG
MARS2	GGTACCAGTGGAGAATCGCG
MAT2A	CCTGATGCCAAAGTAGCTTG
MAT2A	GTGCAGTATATGCAGGATCG
MAT2A	TCCTCATCAAGGTATTTCGC
MAT2A	CAGTCACCAGATATTGCTCA
MAU2	AGTTGACAGAGACACAGTAC
MAU2	GATCTCATCATCGTGCAGTG
MAU2	AATTTAACATCTTCGAACTG
MAU2	ACTCGGCCCCTACACCCAGG
MBTPS1	GCTCAAACATGTTGACCCCG
MBTPS1	AGAACTCTCTTGCTTCGCGG
MBTPS1	GGCATCAAAACACGTGAAGG
MBTPS1	ATGGCCAGGTAGCCCGACCA
MCM3	ATATCCACAGCACTACCCAA
MCM3	CAGTATGAGGAGTTCTACGT
MCM3	GTCATGCCCATGGATACTTG
MCM3	AGAATGACGTCCACAGAGCG
MCRS1	TGAGCAAAGTGGGATCGGTA
MCRS1	CCTCAGGGACATGCGAGATG
MCRS1	GATGACAGGATCGTAGAGCA
MCRS1	ACACAGCATTTATGAGCAGG
MED28	CGAGTTGGAGTCATCTTTCG
MED28	TCCACCAAAGTACTGCTGGA
MED28	GATCAGGAAGAAATTCGAAC
MED28	GAAGCGAAGCTTGGCCCGGA
MIPEP	TGCCATTTCACTATCCGTGG
MIPEP	GAGAGCCCTGTGAGAAAACG
MIPEP	TCACACCACTGTAGTAAGGG
MIPEP	GGTAAAGCACCTTACCAAGT
MLST8	CCTGCCAGAAGCGCACGGTG
MLST8	TATGTCTGGAATCTGACGGG
MLST8	AGCTGGCGTCGGGATCGATG
MLST8	GGCCGCTGGATGTACACGGG
MMS19	TCTTCTCTCTGGATACCATG
MMS19	AGTGCCAATGACAGACACCA
MMS19	CTCTGCGGATAGAAGCCCAA
MMS19	CCTCGTACCCAAGCTCGCTG
MOB4	AGCTCATAAAACTCCAAAAG
MOB4	AAAATTCTTGAACCACCTGA
MOB4	CAGACATGGTACCTGCGCCT
MOB4	TGTACTGTCCATTTCATCAA
MRPL20	GGAGGTGCTGAAGCACGCCA
MRPL20	CTGGATCCGAAAGTAGCGGT
MRPL20	GAAAAATCGCTGCTACAGGT
MRPL20	TGAAGTATCCAGCGCTCATT
MRPL4	GCGCGGTGGCGAAAACATCG
MRPL4	GCCTGGGTCGAGTCCTTGCG
MRPL4	CAAGACCAAGACGAGAGCCG
MRPL4	GCATGTAGTAGTAACTTGTG
MRPL52	GCTCCCAGACTGGTCATATG
MRPL52	CCAGTCTGGGAGCTCGGTAA
MRPL52	ACGAGTTGTACTGCTGTCAC
MRPL52	GGACTCACTGTAGTCGCCAC
MRPL57	CTGACTGCGCTCCTCTGGCG
MRPL57	GGCCTCCCTCCTGCGCACCG
MRPL57	AGGGCATGCTCAGCCAGTAA
MRPL57	GCGCGCAACGACACGAACCG
MRPS18C	ACAACAGGTATCCAGCAATG
MRPS18C	GCTGTGGTTGCTGTTTGCGG
MRPS18C	TACACATCCCGGGACTCACA
MRPS18C	GAAGTTGACACACTTGGTAA
MRTO4	CCCACAGCTTCGGAAATGTG
MRTO4	CACCAACCGCACAAAGGAGG
MRTO4	ATCAGATGGGCTCCGACCCA
MRTO4	TGAAGGACATCCGGAACGCC
MSTO1	CCGTACGATACAGGACGTCG
MSTO1	CATGTCAGCCAGATGAACCA
MSTO1	ACTGCAGTGGAAGGGCAGAG
MSTO1	GGGCGGGGAATAATAACCTG
MVD	AAGCTGACAGGCAGTACCGT
MVD	CTGGTGCAGAGTGACGCTCA
MVD	CACGCCGTAGACACGGGCCA
MVD	GGACAGCATCGCTCGGCAAG
MYC	CTTCGGGGAGACAACGACGG
MYC	AGAGTGCATCGACCCCTCGG
MYC	GCTGCACCGAGTCGTAGTCG
MYC	CTGCGGGGAGGACTCCGTCG
MZT1	GCGGTGCGGGAGACCATGGA
MZT1	CGGCGAATCTGAATGCGGTG
MZT1	AAACTCTGTCTATTTGTGTA
MZT1	CGCATTCAGATTCGCCGCCG
NAA30	GATTGATTAGCCCCGAACTG
NAA30	CCTCTCGCCCGAGTGTACCC
NAA30	AGGGCTTCTTAAGCTGCAGT
NAA30	GGCGGGCGGAGAGTCGGCGA
NAPA	TGAGATCTATGAGACAGAGT
NAPA	CCAGGGCCGATTCACGATTG
NAPA	AAAATGGCCAAAAACTGGAG
NAPA	TTGACATCTACGAACAGGTG
NAPG	GACTACTAGTACGAGGACGT
NAPG	TCCAGCTCGCTCCAAAGCCA
NAPG	GGAGATGCAGAAACTACCAG
NAPG	GAATGAAGAACGCTTACGAC
NBPF10	GAGGCTGGTTGGAGTCACAA
NBPF10	GCTGCTGTAAGACTGGTACG
NBPF10	TAATTGCTCATAGTTACCTG
NBPF10	GTATTGGAGCAACAGCATGT
NCAPD2	CATGCCAAGAAGCATGACAG
NCAPD2	ATCTGTGCCCAGATATTGCA
NCAPD2	CATACGGCGCACCCCAAACA
NCAPD2	AGTTGGACATCCGTCACCTG
NCAPH	CAACTCGAGAGGTTCTCCCG
NCAPH	GAAGTTGACGAGAGTGACTG
NCAPH	TCAATGTCTCCGAAGCAGAT
NCAPH	AATTACATACGTTTGCGTCG
NDC1	ATAAATACTGTGGTGCAGAT
NDC1	TGTGCTGCAGTGATAACCCA
NDC1	AGTGTCTTCATCTTACCCAG
NDC1	CATTACACTAGAGCCAAATG
NDUFAB1	ATGCCCTCTAACGTCAAAGG
NDUFAB1	ACCTGCGCGAGCACTAAGGC
NDUFAB1	TGACAAGATTGACCCAGAGA
NDUFAB1	GCTCCGCGGGGACCCAGACG
NF2	GGAGGAGGCTGAACGCACGA
NF2	CGAGATGGAGTTCAATTGCG
NF2	GACCCCAGTGTTCACAAGCG
NF2	GCTTGGTACGCAGAGCACCG
NGDN	TGTACTGGAACCAAGCGTGG
NGDN	GATGAGGCTTAAAACGAAGT
NGDN	TGAGGTGGGTCAAATCCATA
NGDN	GAGACTGGTGGAGATTCGCA
NHLRC2	TCAGTACCCGAGTTTCCGGA
NHLRC2	GGAGCAGTGAAGCACCTCGT
NHLRC2	TGCATCATTAACCATAGGGT
NHLRC2	AAACAATGCCTATCCTCACA
NIPBL	TATACGAACTAACCTCCATG
NIPBL	TGAGACTGATCCTTCACTAG
NIPBL	CTTTAGCTTGATATGCAACG
NIPBL	AAGTGAGGACTACCTACACA
NMT1	GGGCTTTGGTAGTACCACCC
NMT1	AGGACAACAGCTACAACCGG
NMT1	GCATGTACATACCCAGCTTG
NMT1	GGGTTCGAGTGGTCTCAAGT
NOM1	CCGTCGCGTGCAAAGCTCAG
NOM1	TCCCGGGCGAAAGCTCACCG
NOM1	CCATTTATACAACTTCCACG
NOM1	CGGTCACCGGCAGGACACGG
Non-Targeting_Control	AGTTCCCAGAAATATATTGC
Non-Targeting_Control	CGTGCCTTTACATTCACTTT
Non-Targeting_Control	GATCTAGTCCTCTAATCGAT
Non-Targeting_Control	ACATAGTCGACGGCTCGATT
Non-Targeting_Control	AATGGGTTGCCGGGAGTAAA
Non-Targeting_Control	CATGAGCGCATTGAATAATA
Non-Targeting_Control	TACTAACGCCGCTCCTACAG
Non-Targeting_Control	CGTTGGGCATAGCGAACACT
Non-Targeting_Control	AGAAACTGAACTATCCTACT
Non-Targeting_Control	GGATGTTTCTGTGCGCACAT
Non-Targeting_Control	CGACGCTAGGTAACGTAGAG
Non-Targeting_Control	AACCACGGCATTGAGAGGTG
Non-Targeting_Control	GCTTTCAATTGCAAAAATAC
Non-Targeting_Control	CGCTAAATTGTCACACGTTT
Non-Targeting_Control	GGCTGGTTGACCTTCCCGCT
Non-Targeting_Control	AGGGTCAGTCTGTCCTTTTT
Non-Targeting_Control	ATAGAAGTGTGACCGCTGGG
Non-Targeting_Control	AAAACAGGACGATGTGCGGC
Non-Targeting_Control	CGGTGCTGTGAAAGCCGAGC
Non-Targeting_Control	CGCCGTTCCGAGATACTTGA
Non-Targeting_Control	AGGATGCTGAACAAGTACGT
Non-Targeting_Control	GAGAAGGATGGAAATTAGAA
Non-Targeting_Control	GTGCGACGAATTGTCCTGAG
Non-Targeting_Control	GTCTTCACAGGGTGCAACGA
Non-Targeting_Control	ATGGAAGAGCGTCATGACTT
Non-Targeting_Control	AACGCGAGTCCGGTGGCTAG
Non-Targeting_Control	AGTAGACGGACGGTGAGCTG
Non-Targeting_Control	TAGTCCTTAGGGTGGGCTGA
Non-Targeting_Control	AGCATTCTCACCAAGACCGA
Non-Targeting_Control	ACTAGGGCAGTGTGTCTGCA
Non-Targeting_Control	GACGAGGGCGGCAGAGCAGT
Non-Targeting_Control	CTGCCCTCTTGAAATAGCCA
Non-Targeting_Control	TTCCTGCCCGAACTGCAGAA
Non-Targeting_Control	TCAAGGAGCCTTATTTCTTG
Non-Targeting_Control	CGGCCGCATCCTGTTATATT
Non-Targeting_Control	GCGGAATGAACACGAGGTAG
Non-Targeting_Control	CAGACCTAGCTCCGCTCCCA
Non-Targeting_Control	CATAGGTCCCTAGCAACTCC
Non-Targeting_Control	AGTGGGGCGCTAAGTGGGGG
Non-Targeting_Control	CGCGACGACTCAACCTAGTC
Non-Targeting_Control	TTTTTAATACAAGGTAATCT
Non-Targeting_Control	GTTGGCATATTGGCCCAGAC
Non-Targeting_Control	CTTAAGCTTATCAACATCCG
Non-Targeting_Control	GCGGCGTCTGGGAATCGTTC
Non-Targeting_Control	GCCACACGAATCATAAAGAG
Non-Targeting_Control	GAACTGGCAAACAGGCGTGG
Non-Targeting_Control	AAGAGCGAATCGATTTCGTG
Non-Targeting_Control	ATATTTCGGCAGTTGCAGCA
Non-Targeting_Control	ATTGCTCTGTCGCATCAATC
Non-Targeting_Control	TGCCTATGACCTAGGTACCA
Non-Targeting_Control	GTAAGGCCCGCGTACGAGCT
Non-Targeting_Control	ACCCATTGAGAGTCGCCTGA
Non-Targeting_Control	TTTAACTGTCCCGGTGTGCA
Non-Targeting_Control	CTCGGCCCACTTGCGTTATA
Non-Targeting_Control	CCTGCGGTGCACGGCTAGCC
Non-Targeting_Control	ATCGTTTCCGCTTAACGGCG
Non-Targeting_Control	TGAAGTGGGGCGTCGGACAC
Non-Targeting_Control	CAATATCGGGTGCTACAGGA
Non-Targeting_Control	ATAGTAACGTCAGGGAGTAA
Non-Targeting_Control	AGGACTAGTGTCGCACTCAG
Non-Targeting_Control	CCTCTGGAAGGACACTTCTG
Non-Targeting_Control	AAGAGATCACATCTAGGCCA
Non-Targeting_Control	GGACGCACCATTCCGGGTGA
Non-Targeting_Control	CATCATAAATGTACAACGGG
Non-Targeting_Control	GCTCCCATCCATAGTAAAAA
Non-Targeting_Control	GTATTAAGATGCGTCTTAGA
Non-Targeting_Control	GGATTAATTCGCTAAATGAT
Non-Targeting_Control	GCGGTTCCGGGAGCACATTT
Non-Targeting_Control	ATAATCCGGAAACGCTCGAC
Non-Targeting_Control	TTGGTCCGAGTCTGGAGAAA
Non-Targeting_Control	GGAGTGGTCCCGTACGCAAC
Non-Targeting_Control	CGAACTTAATCCCGTGGCAA
Non-Targeting_Control	GTTTCGAAACTTGAAGTAAG
Non-Targeting_Control	CACCCGGAACCACTACTGAG
Non-Targeting_Control	CCTAGAGGTCCCAAGGCGTG
NPM1	CAAAGATTATCACTTTAAGG
NPM1	TTGTTCACAGGTCAGTTTAG
NPM1	TCTTAAGTATATCTGGAAAG
NPM1	TTCAACCTTAAGACCACTGG
NSL1	CCGCTCTGCGAGATGCGCAG
NSL1	CCAGTGGATGTACAACAGGG
NSL1	CGCACCCGAAAGTCTTCTCG
NSL1	TCCATGGGACAAGGAGCTCG
NUBP2	GGCGCGAGCTGACCTTCTGT
NUBP2	TGCTCATCGGAGGTCCCCGG
NUBP2	TCCTGGTCCTCTCAGGAAAG
NUBP2	AAAGCAGTTTGTGTCCGACG
NUFIP1	CTGAGAATCAAGGGGAGACT
NUFIP1	TGAGTCGCAGCCCCCCATGG
NUFIP1	GGCGGGGCAGTGTCGCTCAG
NUFIP1	TTCTAGAAACTATCCAACTC
NUP155	AAGAATTACTATGTCTACAG
NUP155	ACGGCCTAATACACTGACGC
NUP155	ACTGCTCAACAAGTTCAGGT
NUP155	TTTGGATAGGGACTACCACT
NUP160	AGGATCATAAACTACGAATG
NUP160	TTTGAATCCACACACAAACA
NUP160	CATTCTAGAAAGAGACAACC
NUP160	TACACTCCTATACATCCGGG
NUP35	CAGTCACCCAAGAGTCATCG
NUP35	GGAAAGCCTTAAGCAAAGAT
NUP35	AGTATAAAAAGGATCCAACT
NUP35	TGGGAATATCTTAAAACATG
NUP98	TATTAGCAAGAGTCCAGTTG
NUP98	ATATGAAAGCAAGTCACTAG
NUP98	GATTTCACTATTGGTCGGAA
NUP98	ACAACCAACCTAAGATTGGA
NUPL1	AAATAAGCAACCCTTCTGTG
NUPL1	CTAAGGCTCCCCCTAAAGAG
NUPL1	GCCACTGGGTTCACTCTAGG
NUPL1	AATTCACATATAACCCCTCA
OR7E24	GATCCTCTGAGAGTCCCAGG
OR7E24	CATCGGTTTCACCTCCACCA
OR7E24	ACAAGATTAAGAAGCCACAG
OR7E24	AGGTGTCGGAACACCTAAGG
ORC1	AACTCCTTGACCATACCGGA
ORC1	ATCTGAGGAGCGGCACAACG
ORC1	ACACTTACCCCTATCAGTGG
ORC1	CTGTGACAGCAACATTAATG
OSBP	TCAGCACGAACCATCGCCGC
OSBP	GCAAGAACCTTACCGGCATG
OSBP	AATGACTTGATAGCTAAGCA
OSBP	CGTACTGGCAGCAATATCAG
OXA1L	ATGGCGATGGGACTAATGTG
OXA1L	TGCTGGGAATAGGAGCCGTG
OXA1L	CTGGTAAAGTGCCATCTCCG
OXA1L	TTCTGCAAAAGAGATAGCAG
PC	GGTCCATGCTCAGATCCACG
PC	TCGGACGCGGAACTCCGCAA
PC	CATCTCATACACGGGCGACG
PC	CAGAGTAGATGGCTACGGTG
PDCD10	GGATACATGACTGCATAGAG
PDCD10	ATTCCAAGACCTAAACGAAA
PDCD10	ATGAGATCAATGACAGAGTG
PDCD10	ATCAGCTGCCATACGAAGAA
PDPK1	GTTCTTCGAGTCCGTCACGT
PDPK1	CAAGTTTGGGAAAATCCTTG
PDPK1	CCCGCTCTCTGGTTACATAG
PDPK1	TCTGCTTTAGAGTACTTGCA
PFDN5	AAGGATACAGAACTCGTCAG
PFDN5	GTCCATTGCTCAGCTCAAAG
PFDN5	GTGCTGAACAAGAGCAACGA
PFDN5	TCTGATCTTGTAGACAGCTG
PGGT1B	TATGTTGGATTCCTTAGATG
PGGT1B	ATGGATTGAACGGAATACCC
PGGT1B	TAAGCATGAGAGGCCAGTGT
PGGT1B	AAATAAAGAAGCTTGCTTAG
PGP	GCTTCTCGGCGTAGGCAGCG
PGP	ATGAAGCGGCCGTTCTCAAG
PGP	ACGCTGCTGTTCGACTGCGA
PGP	GCGTGCGGCTGAGCGCCGAG
PHB2	CACAGATTCGCGCACACCGT
PHB2	CCTCACAGCTGATCACCCAG
PHB2	CCCGAATGTCATAGATAATG
PHB2	GTTGCCGTCCATTGTCAACG
PKMYT1	GGGCCATGGCTCCTACGGAG
PKMYT1	AGCAGCGGATGTGTTCAGGT
PKMYT1	GGGAGAATCCAGGTTCTGCG
PKMYT1	CCCCGGAATGACACCCGCCG
PLK4	TTCTCATGGTATACTACACC
PLK4	CAGAGGAATAAGCTCTACGA
PLK4	CGATTCTGATAACCCCATGG
PLK4	ACTGTGTCAGTGTCGAAGGG
PNKP	TGGTCGCAGATCCTGAGACC
PNKP	CGGCACGCCCATATCCATCG
PNKP	AGCTGCCGAAGAAGCGTATG
PNKP	CCGGTACAAGCCTGCGTGCG
PNO1	GAGGTCATCCAACCTGATGA
PNO1	CCGACGGGCGAAGAAACGAC
PNO1	ACAGACTTGTAAAGAAACCA
PNO1	ATGGTGTGTATCTGTTAGCT
POC1A	GTTGATACTGAAGTCCACAC
POC1A	CGGCAATGCACGTCCCACTG
POC1A	CACGATGAGCCGCCCGTCGG
POC1A	TCAGGTAGTTTCCCGACGGG
POLA1	CAACAAGAACTCGTTACGCT
POLA1	CATGACACAACAGCTCACAT
POLA1	CTCTACACACTTTACCGTGG
POLA1	AAGCACGCAATAAAGACAAG
POLD2	TGTCAAAGCTGGTTACGGGT
POLD2	GTTGCCAGCGAGGATAACCC
POLD2	TGTATGTATTTACTCCGAGG
POLD2	GAGTTGGTGTAGGTTGCCAC
POLR3E	AAAAGGCATGACCTTCACTG
POLR3E	GAGGTGCGGAATGTCATCGT
POLR3E	GCCGTGGTGAGGATCAACAA
POLR3E	GACTCGTCCAGCCCTCACAG
POP1	GGAATGTGTAACATAGACAC
POP1	ACCCACCAGTTATATACTTG
POP1	GTGACTGGTGAAGATCGACT
POP1	GAAGTGGGGCTACTGCCTTG
POP4	CTTCACCCGCCACAAGCGCA
POP4	ACATTAAACCAGAGCAGCAG
POP4	ACTCTGGAAACAGTACATCA
POP4	GCGGGCCGAGGCCTTCGTGA
PPP1R11	ACTCACATTTGGATGAGCGG
PPP1R11	GAGCTCTCGCCAAAGGCCCG
PPP1R11	GGAGCCTTACCATCAAACTT
PPP1R11	CGAGACCGTCACTGAGACAA
PPP1R12A	CGTAATTGATGTCGGCGCCG
PPP1R12A	TGGTCAAGGAGCACATGTAG
PPP1R12A	ACAGGAATGGTCACTGCCGT
PPP1R12A	GAACAAGTAGTTCATATACA
PPP1R2	TCCTCGTCGACATTCCCGCG
PPP1R2	GACCTCTCACCTGAAGAACG
PPP1R2	CTTGTCATACTAGTATGATG
PPP1R2	TGGCGCCAGACATCTTAGCC
PPP6C	TGAGAGTAGACAGATAACAC
PPP6C	CCTGCCAGAGAACGACCTGA
PPP6C	CAGTTCTGAACAGTTCACAA
PPP6C	TATCAGGAGATAAACCACCA
PPP6R3	CAACCTAATGACATTCAACC
PPP6R3	GTTACATGGGACACCTAACG
PPP6R3	GGAGTCTTGATCGGTAATTG
PPP6R3	TCAAAGGGGAATCGTTTAGG
PPRC1	TCTCGCGGGCAGTCTACTGT
PPRC1	CTGGTGGGATGACAAGACAA
PPRC1	AGACCTGTCGCACCACAACT
PPRC1	CCAGGAGTACCAGACACTAG
PPTC7	GACTACGGACTGGTGACGGC
PPTC7	TTCGTACCTAGTAATCCCAT
PPTC7	CCAGGAAGCCTGAATCGCCC
PPTC7	CAAGAAGGGCGCGTGCTACG
PREB	GACAGGCATAAAGAATGGCG
PREB	CCTAACTAGTTGGTAACCGT
PREB	GCACGAGGGGCTAGAACTCA
PREB	AGGAGCAGGGGCCTCGACAA
PRKRIR	TCAGCCTCATGTCCATCCAG
PRKRIR	TGAATCTCATAACCTAAGAG
PRKRIR	CAGAACCCCAGCGAAGAAGA
PRKRIR	AGATGGAATAACTATATAGC
PRPF40A	ATGTAACATACTCTACCACT
PRPF40A	TTGAAGTACTACCTGTATCG
PRPF40A	TGAAACCAAACAGTCTACCT
PRPF40A	TACAGTAACTATTTCAACTG
PRPF4B	ATTATGCTTGGCTTTCACTG
PRPF4B	TTTACCTCTTAAATCAACTG
PRPF4B	GAAAACGACGAGAACCAGAG
PRPF4B	AGGCGGTCTCGATCACGCGG
PSMB1	TTACCCTCCGTTGAAAACGT
PSMB1	TCTGATACTCGATTGAGTGA
PSMB1	GTATACAGCTTTGATCCAGT
PSMB1	ATAATAAGGCCATGACTACG
PSMB7	GCAGATACAAGAGCAACTGA
PSMB7	AACTGGCACGACCATCGCTG
PSMB7	GAAAACGTTACACTCACCCA
PSMB7	ACCAGGTATCAAGGTTACAT
PSMC1	TTAGGTGCATGCCGTGATAG
PSMC1	AATTTCATCAATAAACACGA
PSMC1	CAGAGCATACCTGTGCCAGG
PSMC1	GCTGCCAGCAAACTGCCACT
PSMC4	GTGATGTACGCGGACATCGG
PSMC4	GATCAGAATACAGCCATCGT
PSMC4	TGGCTGTGGGAAGACCATGT
PSMC4	GCATTTCGAGCTCTACAAGC
PSMD12	ACTCTACGAATGGTTACCGA
PSMD12	GGGTAGGCGCTGATCCACCG
PSMD12	GATTCAGCTGGATCAACATG
PSMD12	GATTTGGTTCACCGAATAAG
PSMD8	GGTGCATATAGGCTGACTCG
PSMD8	GGCATGTACGAGCAACTCAA
PSMD8	GAGCGACGGCGGGCTACCCG
PSMD8	CCAATGGAGCATCCTACGCA
PSMG3	TCACCACAAAAGTCCTTCTG
PSMG3	GTGACCCAGTTTGGGAAGAT
PSMG3	CAGAAGACGGAGGTGGTGTG
PSMG3	GAAGGCCGTACACACCACCT
PSTK	ATCATACGCGACAACACCGA
PSTK	CTCTTGAGACCTGTTTACAG
PSTK	ATGCTGGACTCGGAATTGTG
PSTK	TGTTAAGAGGTAGCAAGACT
PTPN23	TCAGGTGGTAGATTACTACA
PTPN23	CTGGATGCTATCTACTGTGG
PTPN23	GTCCTCATAGGCTTCATACG
PTPN23	GGAAGGTGTCAGGCAGTCGT
RAD1	AGAGATTCCTAACGTTGTCA
RAD1	AAATGGTATCAAAGTAACAG
RAD1	GCACTTCGAATGTGTTACCA
RAD1	AATCAATACACAGGAACCTG
RBBP4	CACTACGACAGTGAGAAAGG
RBBP4	TCTTTGTTGCGATGATACAA
RBBP4	ATTGCCGTTACAGACCAGAA
RBBP4	TCTTGGAACCCAAATCTCAG
RBBP8	AATCGATCAGACAGATCCAG
RBBP8	GAGCCCCTGAAATCATTGGG
RBBP8	CGTTGCCCAAAGATTCCCCA
RBBP8	GCTACCTCTAGTATCAAAAG
RBX1	ATGGATGTGGATACCCCGAG
RBX1	AGTACACTCTTCTGAAGTAG
RBX1	AGAAGAGTGTACTGTCGCAT
RBX1	GTTATCAACCACAATATCCC
RCE1	CTCCAGAGCAGCACGCACAG
RCE1	CCCATGCACGGTGCTAACAT
RCE1	GCAGCCAACGCATGTCTGTG
RCE1	CCTCCGTAGGGACCATCCCG
RGP1	GCCCCTCTCTAACCTCGGTG
RGP1	TGATAGGGGAGTTGACACGC
RGP1	GGGACCTTAAACTTAGGGGA
RGP1	ACAATATCAGTGATGGCCGA
RHOT1	AGTGGGTTGACCCTGAAAGG
RHOT1	GTAATTGGAGTGAAAAACTG
RHOT1	AGAGGCTGGATAACCTACCA
RHOT1	TACAAGGCATACCTCCACAC
RNF10	TGGGGAAAGAGGAACAAGTG
RNF10	TCTCTGGCCACGTTAGACTC
RNF10	CAGATGACAATCTTAAAGAG
RNF10	GCAGCCAAGATAACCCGTTG
RNF20	TCGGTTGACAATCAATAGTG
RNF20	GCATCGCACCATGTCTCAGG
RNF20	GGAGGGCACTACCACTACGC
RNF20	ACTTCGGCAAGACTTTGAGG
RNF25	GGATTTCGGATAGAGATCTG
RNF25	AACGCAAGCGGCTCTACCAG
RNF25	ACAGATAACAACATCCCTCA
RNF25	GAGGCAAGATCATACACGAG
RNF40	GGGACGCCCAGCGATACAAG
RNF40	GCTCCAGGATAAAGTGACAT
RNF40	GCAGAAGAAGCTACGCACAG
RNF40	AGAGGAGTCCCATCACATGT
RPF1	CGGAGATTAAAAACAAACAG
RPF1	AAATCTCTTGCGATGCACTG
RPF1	AACATCAGATAGACCTCATG
RPF1	CTCCTGAAGTTCTTCGGCAG
RPL28	GGCCCCACTTACAGTGCTGT
RPL28	GGTGAATCAGTCCGTTGTAG
RPL28	CACCACGACACCTTTGCCGT
RPL28	GTGTCGTGGTGGTCATTAAG
RPL30	TCTTCGATTACCTCAAAGCT
RPL30	AAAGTGGGAAGTACGTCCTG
RPL30	AATAGAGTACTATGCTATGT
RPL30	TGCTTTGTAGAAAAAGTCGC
RPL34	TATTGTAGGAAAGCCTACGT
RPL34	GTGCCCAGGCAGACTTCGAG
RPL34	GTAAACAATTCTATTACCAG
RPL34	AACAAAGAAACATGTCAGCA
RPL35A	AACAAAACCAGAGTCATCTG
RPL35A	GCGGGGTCTCCGGAACCAAA
RPL35A	AGCAACACAGTCACTCCTGG
RPL35A	GTGTCTTAGGCTGTGGTCCA
RPL39	TTTCAGGATTAAGCGATTCC
RPL39	AAAATCGTCCCATTCCCCAG
RPL39	TGAAAACTGGAAATAAAATC
RPL39	CAGTGGATTCGGATGAAAAC
RPS19BP1	GACCAGGACGAGAAGCACCG
RPS19BP1	AAACTGCGGAACTCGGCCAA
RPS19BP1	ACTTCAGGTTTACTCTGAGG
RPS19BP1	CCAGGTCAGGCCAAGCCGAG
RPS21	GGGGGCGCTTACCATTTCCG
RPS21	ACCGATGATGCGATTGCTAG
RPS21	AGGTTGACAAGGTCACAGGC
RPS21	CAATCGCATCATCGGTGCCA
RPS23	GTCACCGACGAGACCAGAAG
RPS23	GTCGTGGACTTCGTACTGCT
RPS23	TGCCATTAGGAAGTGTGTAA
RPS23	AAGTTCAAGCAACCGTCATT
RPS26	TCTGAAGCGAGCGTCTTCGA
RPS26	CTGTGCCCGATGCGTGCCCA
RPS26	CGTCATTCGAAACATAGTGG
RPS26	TGCAGCGAATAGGCTGCACG
RPS27	TTCATGGATGTGAAATGCCC
RPS27	TTGTGCATGGCTAAAGACCG
RPS27	GAAACACAAGAAGAAACGCC
RPS27	ACAAAACTACCGTTTGTGCA
RPS5	TTCACTGCAATGTAATCCTG
RPS5	CATACACCTGCTCACAGGCG
RPS5	CCCGGCGCGCCCAATGCGTG
RPS5	ACCTGCCTCACAGTGCAGGG
RPSA	CATAAATCTCAAGAGGACCT
RPSA	TTGGCAGGGAGCTCACTCAG
RPSA	TACACAGCGCAATGGTAGGT
RPSA	TGGCCAGGTTTGTGGAACAG
RRP15	ATCTTCAGAGAATTGCAACA
RRP15	GGTAACTGGAGCCGTAGCGT
RRP15	GCGTGATAAGAGGCTGGAGT
RRP15	TTTGGTTCTATAGGAAGCTG
RRP7A	AGAGCACACGGCGTTCGACA
RRP7A	GGACCTGGCTGAGAGCCCAA
RRP7A	GCAACTCTACAGACTGGACG
RRP7A	TGGCTTCTGGAACACCACAT
RRS1	GCGGTGCGCCGGACCCACGC
RRS1	TACCGGACACCAGAGTAAGG
RRS1	TGGAGGACCAGTTCGCCAAG
RRS1	CAGCTGCATCTTGTGCGCGC
RTF1	TAACATCCCACAACAAGGAA
RTF1	TGAATCGGGTTCGATTATCA
RTF1	TGTCCGAGTCGATCACGACG
RTF1	GCCAAAGTTTACCAACTAGG
SACS	AAACAGTAGAGTGTACCACG
SACS	TCAAGATTGATCCACCCCGA
SACS	TGTTTCCTTATATGTCCGAG
SACS	TTGTCATGCTGACATACCCA
SARS2	TACCGGGCAGAGACAAACAC
SARS2	AAGGTCTGGCACCGTCATGG
SARS2	CTGTACGAGTATGCGCGCGA
SARS2	CCGGTCCTATTACCTGCGCG
SCAP	CTGCTGGACATAAGCCACCG
SCAP	CAGGATGCCAATCCAGACAA
SCAP	GCCCACCCTCAATGGCGGGT
SCAP	GGTCCACGTGCACTTCAAGG
SCD	CAGGTGTAGAACTTGCAGGT
SCD	ATGATCAGAAAGAGCCGTAG
SCD	ATGTCGTCTTCCAAGTAGAG
SCD	GATCCTCATAATTCCCGACG
SCYL1	AGAACATCTTGACCACCACA
SCYL1	CTTGAGGTATATTCCCAACG
SCYL1	CCCACCAGCTCACAGTAATG
SCYL1	CCCCATCGTAGACCAGACAC
SDAD1	CCCAAGAAAGAATGTCAAAG
SDAD1	CGTCATAATAACGTACCTTG
SDAD1	CCTTTAGGGTAAGCCTACAG
SDAD1	TCATCACCTAGTACCCCCAG
SETD1A	GAGATCTCCGACGACGACCG
SETD1A	TATGTGCCGTAAGTACGGTG
SETD1A	CGTATGCTCTATATGCACAG
SETD1A	AGAGCCATCGGAAATTTCCG
SETD8	TGACAGATTGACCTCATCGA
SETD8	GCACGTGACTACCTGCAGCT
SETD8	GGAATCTACAGGAAACGAGA
SETD8	TTTAGGAGAACGTATTTACC
SKA3	CAATGGGACTTAAAAATGCG
SKA3	AGTTCTACCAAACCCTCCAC
SKA3	TCTGAAAGTTGTGGACTACG
SKA3	TTTCACAATTAGACAACTCT
SLBP	CAGATGAAAGTGTCCTAATG
SLBP	TTCTTTAATATAACGATCGT
SLBP	GCGCCGAGCGCAGACCCGAG
SLBP	TCCCAGGCTCCATCGCGCGG
SLC1A3	ACCATACAGAATGAGCTACC
SLC1A3	GACTCTTACCCGAATCACAG
SLC1A3	TCAGGAAGAGAATACCCACG
SLC1A3	ACCCTCCAATAAAAACCCAA
SLC35B1	GCTCCGGGTACGATCCACCC
SLC35B1	TTGGCTTGCAGGATTTACCA
SLC35B1	GAAGAACACACAGTCGGCTA
SLC35B1	TTTGGTAATGAGCCCGCATG
SLC35B2	TATAACCTGCCAGTAAGATG
SLC35B2	CAGGTGTCTTATCTGACTTG
SLC35B2	GCACTCGGTTCATTAGCACC
SLC35B2	CTGGGTCCATGACTCCGGAG
SLC39A1	CCAGCCCCTCGAACACGGAG
SLC39A1	CCTAGTAAGCTGTTTCGCGG
SLC39A1	GCCAGGATGAACTCTTGCAG
SLC39A1	GCATTGGCATGATGGGCCAG
SLC7A5	CATCACGCTGCTCAACGGCG
SLC7A5	CGACTACGCCTACATGCTGG
SLC7A5	ACGTACACCAGCGTCACGAT
SLC7A5	AGGACAGGCCCACGAAGACG
SLMO2	ACTCTGTGCTGAGAAGTCTG
SLMO2	CACACTTACAGACTTCACAA
SLMO2	TCACATCGGCAGCCACCCGT
SLMO2	CATCAACTCCAACCACACTT
SMC5	CCAACGATCATATTCAAGTG
SMC5	ACAGGCAACAGATATTAAGG
SMC5	TTTGTAATGGCATCAATCTG
SMC5	AAACAGCATCATACGTGTCA
SMOX	CCTCTATTCCAAGAATGGCG
SMOX	CGACCACAATCACGACACTG
SMOX	CTTTAGCACACCTAGCGACA
SMOX	GCAGGTCTATAACTTGACCC
SOD2	ATGATCTGCGCGTTGATGTG
SOD2	GACGTTCAGGTTGTTCACGT
SOD2	ACAAACCTCAGCCCTAACGG
SOD2	CCACCATTGAACTTCAGTGC
SON	GCCAGTTGTAACAATGTCAG
SON	GGACATCATAGAGCGCTCGT
SON	GGTTGAAGGACTGACACCGC
SON	GGATTCCAGCGCTGTCGTCG
SPCS3	GGTGGTGATGAAGCAGCCGA
SPCS3	AAGACAGGAGCGTCCCGGTG
SPCS3	CGCCATCACGCTCAGCGAGA
SPCS3	TCTGAACCAAGTTGTCCTAT
SRCAP	AGCTGTCAGAAATCATTGAG
SRCAP	TGCACCTCGTGTCAGCAGGG
SRCAP	TCCAGGGTTGAACTCAACCG
SRCAP	CCAGTGGCAATTCTCCCTCA
SREBF1	ACCAGCTGCACACCATGGGT
SREBF1	GCGATGCCTCCAGAAGTACA
SREBF1	CCTGTAGAGAAGCCTCCCGG
SREBF1	TAAATCTGCTGTCTTGCGCA
SRP19	CCAATACAGAGGCAGAGTCC
SRP19	TCTTGCTTACCTTACTTATG
SRP19	TCCAGCTCAAACAGGAAGAT
SRP19	CAGAACCCACCTGTCCTGGT
SRP68	TGTGCTGTATAACCAACGTG
SRP68	CTTGTGTGAGAGCAATCGCG
SRP68	GGCAGCTACCATGAGTGAAG
SRP68	GAGCTCAAGCCAGATCAGGT
SRP9	GCCAGCGATTTACCTTCATA
SRP9	GATGCCGCAGTACCAGACCT
SRP9	GGTAAAGCTTCTCGGCAGCG
SRP9	CACGTGTGGTTCTCAAATAT
SRPR	AGCATGTCTACACGACGCTG
SRPR	GTCCATGATTGAGACACGGG
SRPR	CACCACCAATGGAACCCCTG
SRPR	TCAAGCTCTTTGAACCCACA
STX18	AGGATGCCCAGATATTCATG
STX18	CAACCTGAATTGGGAACGTG
STX18	TTCAATGAAATCCAAAACAG
STX18	AAGACGCGGAACAAGGCGCT
SUPT16H	AGACTTGAAGCGAATACCCA
SUPT16H	ATATACCATCGCTGTAAAGG
SUPT16H	GAATGTCAGTACCTTGATTG
SUPT16H	TGACGTGTATAACGCTGTCA
TACC3	TCCTTAGGGATTGCACCAGG
TACC3	CAGGCAACGTACCCTCAGCG
TACC3	TGGACTGGAAAACTCACACC
TACC3	GACTTGGTGTCACCTCCGAA
TADA2A	TTCTAAGGTTGATTAATCCA
TADA2A	GGCGATTTGCAAGAATTGTG
TADA2A	ACTTGATATAAGGCTCCATG
TADA2A	AAGGAGTCAAAGGTAGGTCG
TAF1D	TCATTGAAGCAAATGAATGT
TAF1D	CCAGCCAACAGGAAGACCAC
TAF1D	CTGTGGAACTTGCAAATCGA
TAF1D	ATATAGCAAGCTGTTGCAAG
TAOK1	TGGGCGTCATAACTTAGAGC
TAOK1	GAAATAGCAGCAATTACACA
TAOK1	ATGATGGCAAAGTAGATGTG
TAOK1	GATTTGTGACGAGATACTTG
TBCD	CCTTTGTGACTGCAATCTCG
TBCD	CACAGCGAGTCATCTCCTCG
TBCD	TGAGTCCAGATCTTCACATG
TBCD	AAGATGACGACGTCCCAGAG
TBCE	GAAGACGCTGAACAAATGTG
TBCE	CCAGTTAATACTGAACCGGA
TBCE	AGGTGCTGCGGTGTGTCGCG
TBCE	TCTGATTGTCGTTTACTACC
TCEB1	ACTTTCGATAGCACATGTGA
TCEB1	AGGTCCTTCACAGCCACCAT
TCEB1	GTCAAATTGATATCATCTGA
TCEB1	ACGATAAAAGCCATGTTGAG
TCERG1	GGTGGAAACATCATACCCGG
TCERG1	ATAGAACATTAGAATCAACC
TCERG1	GGAAGGGGAACACGAAACGG
TCERG1	GATGTTGAAGTGGATACTGC
TEX10	TACGGCCAGTAATTAGAGCT
TEX10	CCTTGGCAGATGGATCCAGT
TEX10	GATGCATCACTACAATGCTG
TEX10	TATAGAACGAGAACCTCTAC
TFIP11	GGGTGCACATTATTCCTGTG
TFIP11	CATCGTCTATCCACTCATGA
TFIP11	CAGTCAACTTCATCAGCGCA
TFIP11	CAAATACTCTTACAAGACCG
TFRC	CAGGAACCGAGTCTCCAGTG
TFRC	CTATACGCCACATAACCCCC
TFRC	AATTGGTGTGTTGATATACA
TFRC	AAATTCATATGTCCCTCGTG
THAP11	GCACTTCTACACGTTTCCAA
THAP11	GGAGAAGCACCCACTGACGC
THAP11	AGTAGCGCGCAGACCCGCTG
THAP11	CGCGTACCGTGTAGGTCTTG
TIMM13	GGTGAAAGTGCAGATCGCCG
TIMM13	CACCTGCTCGGAGTTGTCCA
TIMM13	GAAGTGTATAGGGAAACCTG
TIMM13	GGCTTCGGCTCCGATTTCGG
TIPIN	ATTGACAGAGTTGAATACCT
TIPIN	TACCCAAGCTGGATGCTCAG
TIPIN	GAAGATGCTAATCAGACACA
TIPIN	GAAGGAACTGAGCCTGATGA
TMEM199	CAGTGAAATCTATCTCCCAG
TMEM199	CCCAGGATACAAGACATGGT
TMEM199	GACGGAAAGAAACCAAGCGT
TMEM199	AGAACCCAGAACTAGTTGCC
TMEM30A	TTGTACCATTAACTTCACAC
TMEM30A	CATTTATTACAGGGACTGGA
TMEM30A	GAGATTTCACGTAACGACGA
TMEM30A	GTAGCACCGTGCCAGCCGTA
TMEM41A	GGTCCTTCGAGAGTACCGGA
TMEM41A	GGCGCCTACCTCTACAAACA
TMEM41A	GAGCCCAGTCTCCGCCCGCG
TMEM41A	TCCAAATCCCCAGGTCGCTG
TMEM41B	TATACTTACTCACTAAGCTG
TMEM41B	AGGCACCAAGTCCAGAACAC
TMEM41B	GCTCACCACACGACCCCCGT
TMEM41B	AGCAGTAAAATGGTCACAGC
TMX2	GGAACTAGAACGGGACAAGA
TMX2	TAACCCGTGTGACTTTGACT
TMX2	CGGTGCCGCGACTTTCACGA
TMX2	TCAGGGCCCATATATAGGGG
TOP1MT	TCATGAATACACAACAAAGG
TOP1MT	GCTCCGATAACACCGTCACG
TOP1MT	GTGGCGACCATCCCAAGATG
TOP1MT	CCATACGAGCCCCTTCCCGA
TP53	GATCCACTCACAGTTTCCAT
TP53	GGTGCCCTATGAGCCGCCTG
TP53	CCATTGTTCAATATCGTCCG
TP53	GAGCGCTGCTCAGATAGCGA
TPI1	GAAGTCGATATAGGCAGTAG
TPI1	CCTGGCATGATCAAAGACTG
TPI1	GCTCATCGGCACTCTGAACG
TPI1	GAGCAGACAAAGGTCATCGC
TTF1	TAACCGGGAATATGAGACAC
TTF1	GATGGCGCCATGATGGAAGA
TTF1	AACAGTCTCAAATAACTAGG
TTF1	CATTCCTAACATCAAGGACA
TTK	AAATGCTGGAAATTGCCCTG
TTK	AAAGACAGGTTGCTCAAAAG
TTK	GATGATGGCAAACAACCCAG
TTK	GAGGACAGACTACTAAAGCC
TUBB8	CAAGGTGTCGGACACCGTGG
TUBB8	GGGACACTACACCGAAGGCG
TUBB8	GTGTACTACAACGAGGCCAG
TUBB8	TCTGCTCAGTAAGATCCGGG
TUBD1	AGTGACTCACACAGTTCCCA
TUBD1	AATGAATTCTCAGACATGTG
TUBD1	ATAGAGGGACAAATACCTAG
TUBD1	GCATGCTTCTGTCAAAAACA
TUBGCP3	GATACAAAGTCGTAGCTGGA
TUBGCP3	AGCATCATCATACCGTCCTG
TUBGCP3	CAGTTAAAACAGATCGACTG
TUBGCP3	GATCATAGGTCCAAACCAGG
TWISTNB	TAAGTCGGCAACTCTAGGCA
TWISTNB	CATGTACTAAACAGCCAATG
TWISTNB	CAAACCATGGAGATAAACAT
TWISTNB	GGGGAAAACTAAATATCACA
TXNRD1	ATAGGATGCTCCAACAACCA
TXNRD1	ACTGAGCTACTACTCTGAGT
TXNRD1	TCTTCTTAGAGGATTTGACC
TXNRD1	TCTCTGTTTCACAAACACAA
TYMS	ATGTGCGCTTGGAATCCAAG
TYMS	ACCAAACGTGTGTTCTGGAA
TYMS	TCTACAGATTATTCAGGACA
TYMS	TTCCAAGGGAGTGAAAATCT
UBE2H	TTAGGATAGGCCAATAACTG
UBE2H	ACGCTTCATCAATGTTGGGA
UBE2H	GCTGCAGCGTCACCATTGAG
UBE2H	GCTTGTATTCTTCTGGTCGG
UBE2N	CCTTCCAGAAGAATACCCAA
UBE2N	CCTCAAAGGGGGAATCCTGA
UBE2N	TGGTTCTGCCAGCAAACGCT
UBE2N	CTGTTGCCTTCATAGATAAG
UBIAD1	CAAGTGCTCCAGTTTCAGAG
UBIAD1	CCGAACCGGACGACATCCTG
UBIAD1	TCGGGACAGTCGTTCCCCAG
UBIAD1	AGGAATTGGATTCAAGTACG
UBOX5	GGGACAAGGCATGATCTCCA
UBOX5	GCGGTATCCCTTGTATCAAG
UBOX5	AACCGCAGTGAAGCCACATG
UBOX5	GCTTCCATCGCGCCAAAAGG
URB2	GATCAAGAGATAATGGCCAA
URB2	CCCGAAGGTATAGAACCTAG
URB2	AAGCTTGAATCAGAGAACGA
URB2	TCGAACCAAAAAAGCCCAGG
USP37	AGGGTTGCTAGAAAATCGGT
USP37	ACTCCAAATTAGTAATAACA
USP37	ATTCTTGTGAGAAGTGTGGT
USP37	AATGTGGTGCTTCGACCCAG
USP39	AGGCGTGAGACTTCAAACCC
USP39	ACTGCCTGAAGCATCTCATG
USP39	GAACATCAAACGTCCTCCAG
USP39	ACTCCCGCTTCACGCGCACA
USP9X	ACAAGTGCTATATCTAACAG
USP9X	TCATACTATACTCATCGACA
USP9X	GTTTACCGCGGAATGCTCTG
USP9X	TCATGGCGATAAAACACATG
UTP11L	ACTAAAGCTGATGAGAACTC
UTP11L	GACTCTGTCGACTAGCTCCG
UTP11L	GGAACACAGAGAGCGAAGCC
UTP11L	GACTCGGGTTAAACTCCAGG
UTP3	CCTGAAAGTCAAGTTGACAG
UTP3	AGGAGGCACAGATCATTCAG
UTP3	GAAAAAACTTTACTATGACA
UTP3	GGCTGGAATGAAGTACAGAG
UTP6	GCGATTCATTCCAACAAACC
UTP6	AGAATGCCAATACAAGCAGT
UTP6	GCCACATAATCCCAAGTGAG
UTP6	AGAAATCCTTAAGGGCGAGT
VARS2	TTCCTGCATGATCTGAACCA
VARS2	TAGGAGGCCAAAAGACACGG
VARS2	CAGGCAGCCTCAACATATCG
VARS2	CCTCCGCAATGACATTCAAG
VBP1	CGTGCCTCTTACCACAAACA
VBP1	GAGCCGCCGCCCATTCCCTG
VBP1	AGCCAATCACGGAATCCCGG
VBP1	GCGCGCTCGCATCCCCAAGA
VHL	CGCCGCATCCACAGCTACCG
VHL	CATACGGGCAGCACGACGCG
VHL	GAGATGCAGGGACACACGAT
VHL	CGGCCCGGAAGAGTCCGGCC
VPS72	CCCAGAAAGCCGGTTCCCAG
VPS72	TGACGCATAGACTTCCGACC
VPS72	GCCTCGAAAGGTCAACACCC
VPS72	TTCTACCAGACGACTTATGG
VWA9	AATATCGTTCAGCAAGAATG
VWA9	ATCCCTAAAGTCATTAACAC
VWA9	AGCGATTGTTCAATTAGGGT
VWA9	TTACCTATAGCACTTAACAA
WDR1	GTGTGCGATTCTCTCCTGAT
WDR1	CTGACGGTGCATAAAAACGG
WDR1	GCAGCATGGACGACACCGTG
WDR1	CATGGGAAATGTGCTGACCA
WDR26	GACATCCTGACTCTTGCATG
WDR26	CCTCTTACCACAATAGCATG
WDR26	GAGAGTCTGTAAACGCCGTG
WDR26	CAGCCTGAATGTCAATAACG
WDR33	AAAGAGACCAGAGAGATATG
WDR33	ATGTTGACAGCAGACCACGG
WDR33	TGCATACCTTGAGTACCCGG
WDR33	CAATGAACATGGCTCAAATG
WWTR1	ATCCGAAGCCTAGCTCGTGG
WWTR1	AGGCTTACCGAGATTTGGCT
WWTR1	AAGGATTCGAATGCGCCAAG
WWTR1	ACGCGGGCGACGAGTGCGAG
XYLT2	ACACCTGGTTGGATAGTCAG
XYLT2	CATGTAGGCGATTCGCACCG
XYLT2	CCAGGGCTATGATAACGTGC
XYLT2	AGGACACAGACAGTTCAGCA
YPEL5	AGTGGCGCCTGTGAAACGAG
YPEL5	TCACATCTCGAACCATGTGG
YPEL5	GTTTGCACAAGAAAACAGAC
YPEL5	AGTACAGTGAAGTTCAAGAT
YY1	AGATATTGACCATGAGACAG
YY1	GGAGACCATCGAGACCACAG
YY1	TGAACAAACGCTGGTCACCG
YY1	GGTCACCGACGACCCGACCC
ZBTB8OS	TGAAGAACAGAAGGCGATCA
ZBTB8OS	TCTACTTCTACTGTTTGGAG
ZBTB8OS	TTCTTTAGGTTACACGCATG
ZBTB8OS	AGTGTCTAATCCTGCAGTCA
ZEB1	GAAGGACAAAAGCTTTGAAG
ZEB1	GGTTACTTGTACACAGCTGA
ZEB1	AATGCTTCACCCATACAACA
ZEB1	CAGACCAGACAGTGTTACCA
ZNF207	GGAACACCTGGCATTAATGG
ZNF207	TGGAAGAACAGACATAGAGT
ZNF207	ATGGGTGGAATGATGCCACC
ZNF207	ATGCAATGAATAGCTAAGCC
ZNHIT3	GCACGCGGCAGGCTGGACAG
ZNHIT3	GTCTGCTTCCGGAAGCACAA
ZNHIT3	TCCCCGCTCACTAGGGCACG
ZNHIT3	CAAGCAGATCACGCAGACGA
ZNHIT6	CAGGAATATCGCATACAACG
ZNHIT6	CCTCCGATAAATCACCCGGT
ZNHIT6	GAGGTGAAGGATGAGAACGC
ZNHIT6	AAGGCCAGAGGAAATACCGA
ZNRD1	ACGGTCACCTGTATTCGCTG
ZNRD1	GGCTTCAACATCAACGTTCG
ZNRD1	AGCTGGAGCAAGTATTGGCG
ZNRD1	GGGGACAGCCATGCCTATGT

## Sheet: NCI-237 HPLM ReScreen
id	neg|score	neg|p-value	neg|fdr	neg|rank	neg|goodsgrna	neg|lfc	neg lfc rank	pos|score	pos|p-value	pos|fdr	pos|rank	pos|goodsgrna
GPI	0.0010711	4.9673e-06	5e-06	3	4	-3.4729	1	0.99887	1	1	375	0
TPI1	0.0012266	4.9673e-06	5e-06	5	4	-3.4627	2	0.99877	1	1	374	0
NSL1	0.0025218	4.9673e-06	5e-06	10	4	-3.2732	3	0.9889	1	1	363	0
VHL	0.0010923	4.9673e-06	5e-06	4	3	-3.1483	4	0.29572	0.94126	1	68	0
GMPPB	0.0043949	4.9673e-06	5e-06	15	3	-3.1258	5	0.46646	0.99777	1	122	0
MYC	0.0008712	4.9673e-06	5e-06	2	4	-2.9749	6	0.99366	1	1	369	0
PSMG3	0.0024279	4.9673e-06	5e-06	9	4	-2.8881	7	0.99757	1	1	373	0
FDX1L	0.0041923	4.9673e-06	5e-06	14	3	-2.8644	8	0.22922	0.86968	1	49	0
WDR1	0.0060071	4.9673e-06	5e-06	18	4	-2.8051	9	0.98773	1	1	361	0
GAPDH	0.005126	4.9673e-06	5e-06	16	4	-2.6515	10	0.99487	1	1	370	0
MSTO1	0.001266	4.9673e-06	5e-06	6	4	-2.6428	11	0.96214	1	1	346	0
RPS26	0.0017591	4.9673e-06	5e-06	8	4	-2.6062	12	0.99574	1	1	371	0
WWTR1	0.010403	4.9673e-06	5e-06	30	3	-2.5746	13	0.91856	1	1	324	0
PPP6C	0.00067487	4.9673e-06	5e-06	1	4	-2.5699	14	0.99933	1	1	376	0
RPS27	0.0078345	4.9673e-06	5e-06	23	3	-2.5372	15	0.697	1	1	213	0
EGLN1	0.0032788	4.9673e-06	5e-06	12	3	-2.5333	16	0.91221	1	1	322	0
GFER	0.033496	4.9673e-06	5e-06	68	3	-2.4763	17	0.88847	1	1	313	0
RPL28	0.0097624	4.9673e-06	5e-06	29	3	-2.4631	18	0.91302	1	1	323	0
ZBTB8OS	0.0067854	4.9673e-06	5e-06	21	3	-2.4621	19	0.8736	1	1	307	0
CDK6	0.0082974	4.9673e-06	5e-06	26	3	-2.4533	20	0.70112	1	1	215	0
UTP3	0.015619	4.9673e-06	5e-06	38	4	-2.418	21	0.95877	1	1	344	0
EIF6	0.0063181	4.9673e-06	5e-06	19	3	-2.3714	22	0.62879	0.99993	1	185	0
NHLRC2	0.011572	4.9673e-06	5e-06	33	3	-2.3208	23	0.41742	0.99228	1	106	0
MCM3	0.021472	4.9673e-06	5e-06	47	3	-2.3009	24	0.72108	1	1	225	0
HYPK	0.0079506	4.9673e-06	5e-06	24	4	-2.2644	25	0.99205	1	1	366	0
ANAPC1	0.012973	4.9673e-06	5e-06	34	3	-2.2485	26	0.17359	0.78413	1	37	0
CCT6A	0.005822	4.9673e-06	5e-06	17	4	-2.2472	27	0.98687	1	1	360	0
MVD	0.059642	4.9673e-06	5e-06	93	3	-2.2441	28	0.58479	0.99969	1	166	0
SOD2	0.033693	4.9673e-06	5e-06	69	4	-2.2394	29	0.96631	1	1	347	0
PHB2	0.015567	4.9673e-06	5e-06	37	3	-2.2325	30	0.87467	1	1	308	0
RPS23	0.0014148	4.9673e-06	5e-06	7	2	-2.2189	31	0.356	0.96734	1	91	0
FEN1	0.011185	4.9673e-06	5e-06	31	4	-2.2062	32	0.98882	1	1	362	0
RPSA	0.019436	4.9673e-06	5e-06	42	3	-2.1738	33	0.34869	0.96303	1	89	0
HSPA8	0.0031643	4.9673e-06	5e-06	11	4	-2.173	34	0.99684	1	1	372	0
POLD2	0.035599	4.9673e-06	5e-06	70	4	-2.1697	35	0.94241	1	1	336	0
DIS3	0.0037945	4.9673e-06	5e-06	13	3	-2.1686	36	0.67795	0.99999	1	208	0
ANKRD49	0.0562	4.9673e-06	5e-06	90	3	-2.153	37	0.30154	0.94127	1	71	0
CCT7	0.020438	4.9673e-06	5e-06	44	3	-2.1371	38	0.48826	0.99805	1	130	0
HNRNPC	0.032799	4.9673e-06	5e-06	66	3	-2.102	39	0.80999	1	1	269	0
CUL3	0.032255	4.9673e-06	5e-06	65	3	-2.0994	40	0.8567	1	1	294	0
RPL35A	0.030398	4.9673e-06	5e-06	62	3	-2.0697	41	0.83687	1	1	281	0
EIF1AX	0.0091276	4.9673e-06	5e-06	27	3	-2.0353	42	0.24985	0.89182	1	56	0
HDAC3	0.058499	4.9673e-06	5e-06	92	3	-2.0236	43	0.84453	1	1	287	0
NUP155	0.020218	4.9673e-06	5e-06	43	4	-2.0198	44	0.95494	1	1	342	0
ZNHIT3	0.024468	4.9673e-06	5e-06	53	4	-2.0103	45	0.97553	1	1	354	0
DDX20	0.042581	4.9673e-06	5e-06	75	3	-2.0051	46	0.31309	0.94754	1	74	0
C19orf25	0.024156	4.9673e-06	5e-06	52	4	-1.9935	47	0.97584	1	1	355	0
SLC35B1	0.0063938	4.9673e-06	5e-06	20	4	-1.99	48	0.99361	1	1	368	0
ZNRD1	0.085603	4.9673e-06	5e-06	107	3	-1.9843	49	0.64421	0.99998	1	191	0
COPE	0.0082238	4.9673e-06	5e-06	25	4	-1.9821	50	0.99178	1	1	365	0
LAMTOR2	0.078222	4.9673e-06	5e-06	103	3	-1.9781	51	0.93558	1	1	334	0
CENPM	0.033347	4.9673e-06	5e-06	67	3	-1.9742	52	0.54687	0.99879	1	153	0
PPP1R11	0.082176	4.9673e-06	5e-06	105	3	-1.918	53	0.81361	1	1	270	0
NUP98	0.015261	4.9673e-06	5e-06	36	2	-1.9018	54	0.56479	0.99916	1	162	0
RRS1	0.026405	4.9673e-06	5e-06	56	3	-1.8786	55	0.72878	1	1	229	0
ATP5D	0.17954	4.9673e-06	5e-06	148	3	-1.8691	56	0.61536	0.99988	1	179	0
CBWD5	0.056111	4.9673e-06	5e-06	89	4	-1.869	57	0.94389	1	1	338	0
UTP6	0.10433	4.9673e-06	5e-06	120	3	-1.8602	58	0.70418	1	1	217	0
PREB	0.018864	4.9673e-06	5e-06	41	2	-1.8492	59	0.80706	1	1	266	0
GNL3	0.009236	4.9673e-06	5e-06	28	4	-1.8378	60	0.99076	1	1	364	0
NUP35	0.05249	4.9673e-06	5e-06	85	3	-1.8341	61	0.85729	1	1	295	0
SON	0.052128	4.9673e-06	5e-06	84	3	-1.8339	62	0.71023	1	1	221	0
BRCA1	0.02593	4.9673e-06	5e-06	55	3	-1.8289	63	0.80184	1	1	262	0
PGGT1B	0.060457	4.9673e-06	5e-06	94	3	-1.8255	64	0.16919	0.76665	1	36	0
OR7E24	0.011351	4.9673e-06	5e-06	32	2	-1.8074	65	0.050929	0.24238	1	10	0
MAT2A	0.022973	4.9673e-06	5e-06	49	3	-1.805	66	0.83227	1	1	278	0
DHFR	0.02916	4.9673e-06	5e-06	60	4	-1.8048	67	0.97084	1	1	350	0
USP39	0.080409	4.9673e-06	5e-06	104	3	-1.7846	68	0.88095	1	1	311	0
TBCD	0.1925	4.9673e-06	5e-06	159	3	-1.7804	69	0.50342	0.99806	1	136	0
FPGS	0.050337	4.9673e-06	5e-06	80	3	-1.7802	70	0.43578	0.99229	1	114	0
CCS	0.0072972	4.9673e-06	5e-06	22	4	-1.7608	71	0.9927	1	1	367	0
NDC1	0.090921	4.9673e-06	5e-06	110	3	-1.7404	72	0.8928	1	1	314	0
H3F3A	0.10294	4.9673e-06	5e-06	118	3	-1.7352	73	0.38641	0.97825	1	99	0
GTF2E2	0.050831	4.9673e-06	5e-06	81	2	-1.7329	74	0.90287	1	1	320	0
FNTA	0.15115	4.9673e-06	5e-06	138	3	-1.7259	75	0.80259	1	1	263	0
EIF2B4	0.047828	4.9673e-06	5e-06	77	2	-1.7226	76	0.72591	1	1	228	0
PSTK	0.016365	4.9673e-06	5e-06	39	2	-1.7055	77	0.75358	1	1	240	0
PSMB7	0.077061	4.9673e-06	5e-06	102	3	-1.7032	78	0.058215	0.24239	1	12	0
ACTR1A	0.041926	4.9673e-06	5e-06	74	4	-1.6895	79	0.95807	1	1	343	0
SRP9	0.16138	4.9673e-06	5e-06	141	3	-1.6591	80	0.60663	0.99981	1	174	0
RAD1	0.054698	4.9673e-06	5e-06	88	3	-1.6587	81	0.76146	1	1	244	0
ORC1	0.018648	4.9673e-06	5e-06	40	4	-1.6584	82	0.98135	1	1	359	0
SCAP	0.15857	4.9673e-06	5e-06	140	2	-1.6513	83	0.67359	0.99999	1	205	0
PFDN5	0.023389	4.9673e-06	5e-06	50	4	-1.6481	84	0.97661	1	1	356	0
AP2S1	0.19175	4.9673e-06	5e-06	158	3	-1.6328	85	0.78396	1	1	254	0
ABCF1	0.02952	4.9673e-06	5e-06	61	4	-1.6275	86	0.97048	1	1	349	0
MAEA	0.10923	4.9673e-06	5e-06	124	2	-1.6247	87	0.79729	1	1	261	0
MARS2	0.02657	4.9673e-06	5e-06	57	4	-1.6215	88	0.97343	1	1	352	0
IGBP1	0.14008	4.9673e-06	5e-06	134	3	-1.6212	89	0.93328	1	1	331	0
CFLAR	0.06367	4.9673e-06	5e-06	97	3	-1.6125	90	0.83622	1	1	280	0
LMNA	0.52578	4.9673e-06	5e-06	248	2	-1.6083	91	0.85963	1	1	297	0
TXNRD1	0.10353	4.9673e-06	5e-06	119	2	-1.6081	92	0.70923	1	1	220	0
GOSR2	0.22726	4.9673e-06	5e-06	172	3	-1.5966	93	0.82139	1	1	273	0
IPO13	0.1216	4.9673e-06	5e-06	128	3	-1.5868	94	0.85611	1	1	293	0
PNKP	0.051441	4.9673e-06	5e-06	83	2	-1.5853	95	0.38112	0.97824	1	98	0
TAF1D	0.18246	4.9673e-06	5e-06	150	3	-1.5842	96	0.48056	0.99778	1	129	0
RPL34	0.03099	4.9673e-06	5e-06	63	4	-1.5791	97	0.96901	1	1	348	0
DIMT1	0.1288	4.9673e-06	5e-06	130	3	-1.5722	98	0.75623	1	1	241	0
SUPT16H	0.075249	4.9673e-06	5e-06	101	3	-1.5717	99	0.53984	0.99879	1	150	0
C7orf26	0.082201	4.9673e-06	5e-06	106	2	-1.5638	100	0.89328	1	1	315	0
MLST8	0.18148	4.9673e-06	5e-06	149	3	-1.5587	101	0.73067	1	1	231	0
C19orf43	0.0625	4.9673e-06	5e-06	96	4	-1.5578	102	0.9375	1	1	335	0
SLC35B2	0.020779	4.9673e-06	5e-06	45	4	-1.5473	103	0.97922	1	1	358	0
MMS19	0.06825	4.9673e-06	5e-06	99	3	-1.5382	104	0.84578	1	1	289	0
HNRNPL	0.2764	4.9673e-06	5e-06	197	3	-1.534	105	0.36145	0.96735	1	94	0
EMC3	0.029058	4.9673e-06	5e-06	59	2	-1.5312	106	0.22295	0.86967	1	47	0
EAF1	0.06765	4.9673e-06	5e-06	98	3	-1.5288	107	0.46962	0.99777	1	124	0
KAT5	0.04902	4.9673e-06	5e-06	78	2	-1.5285	108	0.44723	0.99378	1	118	0
TIMM13	0.24658	4.9673e-06	5e-06	180	3	-1.5188	109	0.72973	1	1	230	0
SMC5	0.2289	4.9673e-06	5e-06	174	3	-1.5168	110	0.61906	0.99992	1	181	0
RBX1	0.06165	4.9673e-06	5e-06	95	3	-1.5119	111	0.9278	1	1	329	0
TADA2A	0.17278	4.9673e-06	5e-06	145	3	-1.5109	112	0.70316	1	1	216	0
KANSL2	0.2226	4.9673e-06	5e-06	169	3	-1.51	113	0.49437	0.99805	1	132	0
SRPR	0.18799	4.9673e-06	5e-06	155	3	-1.5062	114	0.82347	1	1	275	0
VARS2	0.20952	4.9673e-06	5e-06	167	3	-1.5013	115	0.50041	0.99806	1	134	0
PDPK1	0.20873	4.9673e-06	5e-06	166	3	-1.4982	116	0.90418	1	1	321	0
EXOSC9	0.19784	4.9673e-06	5e-06	162	3	-1.4929	117	0.93394	1	1	333	0
ATP1A1	0.11404	4.9673e-06	5e-06	126	3	-1.4869	118	0.54827	0.9988	1	154	0
PSMD12	0.022938	4.9673e-06	5e-06	48	4	-1.4866	119	0.97706	1	1	357	0
TUBGCP3	0.025261	4.9673e-06	5e-06	54	4	-1.483	120	0.97474	1	1	353	0
SETD1A	0.090459	4.9673e-06	5e-06	109	3	-1.4767	121	0.63359	0.99997	1	186	0
MBTPS1	0.2648	4.9673e-06	5e-06	191	3	-1.4678	122	0.42582	0.99228	1	110	0
TACC3	0.18539	4.9673e-06	5e-06	151	3	-1.4628	123	0.69284	1	1	212	0
ATG9A	0.11808	4.9673e-06	5e-06	127	3	-1.4593	124	0.71717	1	1	224	0
URB2	0.086016	4.9673e-06	5e-06	108	3	-1.4585	125	0.61039	0.99982	1	177	0
PNO1	0.1062	4.9673e-06	5e-06	122	3	-1.4521	126	0.61783	0.99992	1	180	0
TMEM199	0.17191	4.9673e-06	5e-06	144	3	-1.4505	127	0.4537	0.99575	1	119	0
XYLT2	0.31585	4.9673e-06	5e-06	209	2	-1.4475	128	0.92086	1	1	327	0
NUFIP1	0.1865	4.9673e-06	5e-06	152	3	-1.4436	129	0.52696	0.99848	1	145	0
H3F3B	0.16276	4.9673e-06	5e-06	142	3	-1.439	130	0.64187	0.99997	1	189	0
PKMYT1	0.2474	4.9673e-06	5e-06	181	3	-1.4316	131	0.84327	1	1	285	0
HAUS8	0.19554	4.9673e-06	5e-06	160	3	-1.4314	132	0.77829	1	1	250	0
CCT5	0.052687	4.9673e-06	5e-06	86	4	-1.4261	133	0.94731	1	1	340	0
CCNL1	0.10079	4.9673e-06	5e-06	117	3	-1.4229	134	0.78556	1	1	256	0
MRPL57	0.050225	4.9673e-06	5e-06	79	4	-1.4188	135	0.94978	1	1	341	0
CTC1	0.40872	4.9673e-06	5e-06	228	2	-1.418	136	0.66475	0.99999	1	200	0
MRPL20	0.31917	4.9673e-06	5e-06	210	2	-1.4178	137	0.72398	1	1	227	0
EIF2B5	0.054379	4.9673e-06	5e-06	87	4	-1.4136	138	0.94562	1	1	339	0
DCTN1	0.13627	4.9673e-06	5e-06	133	3	-1.4135	139	0.89701	1	1	318	0
EMC7	0.10759	4.9673e-06	5e-06	123	2	-1.4077	140	0.73724	1	1	234	0
NBPF10	0.18932	4.9673e-06	5e-06	157	3	-1.405	141	0.83556	1	1	279	0
NOM1	0.30777	4.9673e-06	5e-06	205	3	-1.4002	142	0.49891	0.99806	1	133	0
GOLGA6A	0.18735	4.9673e-06	5e-06	154	3	-1.3981	143	0.34131	0.95842	1	86	0
VBP1	0.3425	4.9673e-06	5e-06	217	2	-1.3909	144	0.40892	0.99096	1	103	0
ERCC3	0.036229	4.9673e-06	5e-06	71	2	-1.3873	145	0.13563	0.74822	1	27	0
CSK	0.20637	4.9673e-06	5e-06	164	3	-1.3783	146	0.90154	1	1	319	0
C12orf45	0.22777	4.9673e-06	5e-06	173	2	-1.3741	147	0.17579	0.78413	1	38	0
DDX6	0.25506	4.9673e-06	5e-06	188	3	-1.3627	148	0.93361	1	1	332	0
KANSL1	0.026905	4.9673e-06	5e-06	58	4	-1.3476	149	0.97309	1	1	351	0
RPF1	0.11347	4.9673e-06	5e-06	125	3	-1.336	150	0.2313	0.86968	1	50	0
TMX2	0.23975	4.9673e-06	5e-06	179	3	-1.3232	151	0.86478	1	1	302	0
NPM1	0.33804	4.9673e-06	5e-06	216	2	-1.3014	152	0.86422	1	1	301	0
POP1	0.18724	4.9673e-06	5e-06	153	3	-1.2899	153	0.55933	0.9988	1	159	0
ACTG1	0.28547	4.9673e-06	5e-06	199	3	-1.2895	154	0.66363	0.99999	1	199	0
SREBF1	0.2728	4.9673e-06	5e-06	196	3	-1.2861	155	0.37045	0.9712	1	96	0
MRTO4	0.14931	4.9673e-06	5e-06	137	2	-1.2826	156	0.10339	0.56204	1	21	0
LARP1	0.20716	4.9673e-06	5e-06	165	3	-1.2803	157	0.9253	1	1	328	0
PSMC4	0.072663	4.9673e-06	5e-06	100	2	-1.2796	158	0.78953	1	1	258	0
DIEXF	0.23338	4.9673e-06	5e-06	177	2	-1.2783	159	0.5607	0.9988	1	160	0
RPS19BP1	0.38733	4.9673e-06	5e-06	226	2	-1.277	160	0.66251	0.99999	1	198	0
ACTB	0.5236	4.9673e-06	5e-06	246	2	-1.2726	161	0.9201	1	1	326	0
TWISTNB	0.19938	4.9673e-06	5e-06	163	3	-1.27	162	0.13335	0.74822	1	26	0
WDR33	0.094014	4.9673e-06	5e-06	112	2	-1.2587	163	0.71619	1	1	223	0
VWA9	0.12279	4.9673e-06	5e-06	129	3	-1.2582	164	0.72205	1	1	226	0
SLMO2	0.28913	4.9673e-06	5e-06	200	3	-1.2567	165	0.332	0.95841	1	81	0
OXA1L	0.33581	4.9673e-06	5e-06	214	2	-1.2561	166	0.76059	1	1	243	0
OSBP	0.091666	4.9673e-06	5e-06	111	3	-1.2509	167	0.7649	1	1	245	0
USP9X	0.15455	4.9673e-06	5e-06	139	3	-1.2506	168	0.67577	0.99999	1	207	0
TMEM30A	0.30966	4.9673e-06	5e-06	207	3	-1.2446	169	0.78476	1	1	255	0
BANP	0.56902	4.9673e-06	5e-06	251	2	-1.2417	170	0.60788	0.99982	1	175	0
GLTSCR2	0.26745	4.9673e-06	5e-06	192	3	-1.2349	171	0.85433	1	1	292	0
JUN	0.30119	4.9673e-06	5e-06	202	3	-1.2305	172	0.82689	1	1	276	0
IKBKAP	0.26788	4.9673e-06	5e-06	193	2	-1.2255	173	0.55383	0.9988	1	158	0
MIPEP	0.2956	4.9673e-06	5e-06	201	3	-1.2132	174	0.67468	0.99999	1	206	0
COPS4	0.37497	4.9673e-06	5e-06	224	2	-1.2041	175	0.59902	0.9997	1	172	0
WDR26	0.22398	4.9673e-06	5e-06	170	3	-1.2041	176	0.78716	1	1	257	0
ATP5B	0.38509	4.9673e-06	5e-06	225	2	-1.2037	177	0.69907	1	1	214	0
SCYL1	0.30264	4.9673e-06	5e-06	203	2	-1.1995	178	0.91972	1	1	325	0
NAPA	0.039179	4.9673e-06	5e-06	73	4	-1.1989	179	0.96082	1	1	345	0
IER3IP1	0.4974	4.9673e-06	5e-06	244	2	-1.1913	180	0.75181	1	1	239	0
NDUFAB1	0.47493	4.9673e-06	5e-06	238	2	-1.1883	181	0.2437	0.88108	1	55	0
TBCE	0.19748	4.9673e-06	5e-06	161	2	-1.1854	182	0.87573	1	1	309	0
SDAD1	0.14917	4.9673e-06	5e-06	136	2	-1.1819	183	0.83881	1	1	282	0
EIF2S2	0.09636	4.9673e-06	5e-06	114	2	-1.181	184	0.6918	1	1	211	0
STX18	0.24911	4.9673e-06	5e-06	183	3	-1.1793	185	0.7391	1	1	235	0
PLK4	0.2604	4.9673e-06	5e-06	190	3	-1.179	186	0.92885	1	1	330	0
PPP1R2	0.35926	4.9673e-06	5e-06	223	2	-1.179	187	0.35235	0.96734	1	90	0
ZNF207	0.056403	4.9673e-06	5e-06	91	4	-1.1785	188	0.9436	1	1	337	0
ATG101	0.58071	4.9673e-06	5e-06	255	2	-1.1754	189	0.43907	0.99229	1	115	0
UBE2N	0.031292	4.9673e-06	5e-06	64	1	-1.1744	190	0.54266	0.99879	1	151	0
RBBP4	0.35418	4.9673e-06	5e-06	221	2	-1.1684	191	0.86759	1	1	304	0
FNTB	0.31309	4.9673e-06	5e-06	208	2	-1.1577	192	0.53415	0.99879	1	148	0
THAP11	0.35143	4.9673e-06	5e-06	219	2	-1.1496	193	0.54407	0.99879	1	152	0
POP4	0.43235	4.9673e-06	5e-06	231	2	-1.1486	194	0.32637	0.95297	1	79	0
CKS1B	0.32027	4.9673e-06	5e-06	211	2	-1.1432	195	0.77665	1	1	249	0
ZNHIT6	0.27191	4.9673e-06	5e-06	195	3	-1.1366	196	0.84516	1	1	288	0
TIPIN	0.24825	4.9673e-06	5e-06	182	3	-1.1329	197	0.84764	1	1	290	0
ANAPC5	0.35235	4.9673e-06	5e-06	220	2	-1.1314	198	0.64304	0.99998	1	190	0
TUBD1	0.23545	4.9673e-06	5e-06	178	2	-1.1247	199	0.41403	0.99097	1	105	0
LSM4	0.25392	4.9673e-06	5e-06	187	2	-1.1143	200	0.59518	0.9997	1	170	0
MRPL4	0.58177	4.9673e-06	5e-06	256	2	-1.1135	201	0.61163	0.99982	1	178	0
RPS5	0.021359	4.9673e-06	5e-06	46	2	-1.1058	202	0.39166	0.98096	1	100	0
CNOT1	0.21669	4.9673e-06	5e-06	168	3	-1.1007	203	0.74094	1	1	236	0
UTP11L	0.42898	4.9673e-06	5e-06	230	2	-1.0958	204	0.85905	1	1	296	0
GAR1	0.23221	4.9673e-06	5e-06	176	3	-1.0943	205	0.86925	1	1	305	0
SRP19	0.82757	4.9673e-06	5e-06	296	1	-1.0884	206	0.87626	1	1	310	0
SACS	0.30871	4.9673e-06	5e-06	206	3	-1.0781	207	0.75798	1	1	242	0
MZT1	0.094021	4.9673e-06	5e-06	113	2	-1.0726	208	0.40721	0.99096	1	102	0
DHX38	0.0436	4.9673e-06	5e-06	76	2	-1.072	209	0.80334	1	1	264	0
CENPC	0.57688	4.9673e-06	5e-06	254	2	-1.0709	210	0.32825	0.95297	1	80	0
CHMP3	0.27101	4.9673e-06	5e-06	194	3	-1.0705	211	0.80779	1	1	267	0
PSMD8	0.22673	4.9673e-06	5e-06	171	2	-1.0694	212	0.53842	0.99879	1	149	0
CTU1	0.42448	4.9673e-06	5e-06	229	2	-1.0651	213	0.34685	0.96303	1	88	0
NUPL1	0.49606	4.9673e-06	5e-06	243	2	-1.0613	214	0.64653	0.99998	1	192	0
ATP6V1D	0.44247	4.9673e-06	5e-06	232	2	-1.056	215	0.42749	0.99228	1	111	0
PPP1R12A	0.2313	4.9673e-06	5e-06	175	2	-1.0501	216	0.68333	0.99999	1	210	0
PPP6R3	0.48384	4.9673e-06	5e-06	239	2	-1.0444	217	0.68011	0.99999	1	209	0
LIN9	0.32581	4.9673e-06	5e-06	213	2	-1.0437	218	0.8855	1	1	312	0
LAS1L	0.14242	4.9673e-06	5e-06	135	2	-1.0361	219	0.20177	0.84486	1	43	0
GATC	0.70722	4.9673e-06	5e-06	281	1	-1.0341	220	0.30925	0.94753	1	73	0
POLR3E	0.050929	4.9673e-06	5e-06	82	2	-1.0334	221	0.89609	1	1	317	0
RRP7A	0.4537	4.9673e-06	5e-06	234	2	-1.0301	222	0.077441	0.40035	1	15	0
UBOX5	0.57115	4.9673e-06	5e-06	252	2	-1.0285	223	0.62273	0.99992	1	182	0
RPL30	0.01386	4.9673e-06	5e-06	35	2	-1.025	224	0.53272	0.99879	1	147	0
ELP4	0.68178	4.9673e-06	5e-06	279	2	-1.0241	225	0.86647	1	1	303	0
UBIAD1	0.13335	4.9673e-06	5e-06	132	1	-1.0205	226	0.84888	1	1	291	0
LSM5	0.098716	4.9673e-06	5e-06	116	2	-1.0082	227	0.8296	1	1	277	0
SRP68	0.17579	4.9673e-06	5e-06	147	1	-1.0056	228	0.79344	1	1	260	0
TEX10	0.62438	4.9673e-06	5e-06	266	2	-1.0044	229	0.28199	0.91906	1	65	0
HAUS3	0.24997	4.9673e-06	5e-06	184	3	-1.0043	230	0.81788	1	1	271	0
SARS2	0.63119	4.9673e-06	5e-06	268	1	-0.98914	231	0.80853	1	1	268	0
ATP5I	0.87784	4.9673e-06	5e-06	312	1	-0.98142	232	0.74551	1	1	237	0
GTF2H4	0.65453	4.9673e-06	5e-06	273	2	-0.98065	233	0.47589	0.99778	1	127	0
DDX18	0.32448	4.9673e-06	5e-06	212	2	-0.97421	234	0.42414	0.99228	1	109	0
NAPG	0.25864	4.9673e-06	5e-06	189	3	-0.97278	235	0.59389	0.9997	1	169	0
AAMP	0.66632	4.9673e-06	5e-06	276	2	-0.97269	236	0.77582	1	1	248	0
NMT1	0.80779	4.9673e-06	5e-06	293	1	-0.97144	237	0.40206	0.98919	1	101	0
CEP192	0.6856	4.9673e-06	5e-06	280	2	-0.97055	238	0.78154	1	1	253	0
YPEL5	0.60378	4.9673e-06	5e-06	258	2	-0.96463	239	0.10805	0.5894	1	22	0
RPL39	0.25083	4.9673e-06	5e-06	185	3	-0.96429	240	0.86251	1	1	299	0
HIST1H2BI	0.096371	4.9673e-06	5e-06	115	3	-0.96387	241	0.41063	0.99097	1	104	0
POLA1	0.2782	4.9673e-06	5e-06	198	3	-0.96114	242	0.87306	1	1	306	0
KCTD10	0.54687	4.9673e-06	5e-06	250	2	-0.95767	243	0.658	0.99999	1	195	0
SKA3	0.60586	4.9673e-06	5e-06	260	2	-0.95602	244	0.23959	0.88107	1	53	0
MRPS18C	0.91856	4.9673e-06	5e-06	322	1	-0.95414	245	0.63951	0.99997	1	188	0
CCT8	0.65056	4.9673e-06	5e-06	272	2	-0.94412	246	0.47276	0.99778	1	126	0
PRPF40A	0.5902	4.9673e-06	5e-06	257	2	-0.94183	247	0.44234	0.99229	1	116	0
MED28	0.46488	4.9673e-06	5e-06	235	2	-0.93475	248	0.46804	0.99777	1	123	0
LETM1	0.92123	4.9673e-06	5e-06	324	1	-0.92706	249	0.76661	1	1	246	0
TCERG1	0.80409	4.9673e-06	5e-06	292	1	-0.92429	250	0.22085	0.86967	1	46	0
BAP1	0.95058	4.9673e-06	5e-06	337	0	-0.91393	251	0.82208	1	1	274	0
ERI1	0.85433	4.9673e-06	5e-06	303	1	-0.91388	252	0.71222	1	1	222	0
HIF1AN	0.93907	4.9673e-06	5e-06	330	0	-0.91364	253	0.86365	1	1	300	0
PRPF4B	0.60793	4.9673e-06	5e-06	261	2	-0.91005	254	0.66587	0.99999	1	201	0
NGDN	0.18886	4.9673e-06	5e-06	156	2	-0.90664	255	0.15142	0.76664	1	32	0
AQR	0.68082	4.9673e-06	5e-06	278	2	-0.90598	256	0.8439	1	1	286	0
RGP1	0.48979	4.9673e-06	5e-06	240	1	-0.8987	257	0.51383	0.99848	1	139	0
SCD	0.47119	4.9673e-06	5e-06	237	2	-0.89834	258	0.77992	1	1	251	0
GEMIN7	0.73162	4.9673e-06	5e-06	283	1	-0.89734	259	0.54966	0.9988	1	155	0
HAUS4	0.25342	4.9673e-06	5e-06	186	3	-0.89706	260	0.73538	1	1	233	0
NCAPD2	0.52407	4.9673e-06	5e-06	247	1	-0.89565	261	0.49285	0.99805	1	131	0
ALYREF	0.77417	4.9673e-06	5e-06	287	1	-0.8918	262	0.50192	0.99806	1	135	0
PPRC1	0.34361	4.9673e-06	5e-06	218	2	-0.88716	263	0.65459	0.99998	1	194	0
BRAT1	0.16699	4.9673e-06	5e-06	143	1	-0.88507	264	0.3188	0.95296	1	76	0
DGCR8	0.49273	4.9673e-06	5e-06	241	2	-0.88338	265	0.33574	0.95841	1	83	0
ACTR10	0.60482	4.9673e-06	5e-06	259	2	-0.87394	266	0.81999	1	1	272	0
DDX27	0.6624	4.9673e-06	5e-06	275	2	-0.87031	267	0.55105	0.9988	1	156	0
MOB4	0.13108	4.9673e-06	5e-06	131	2	-0.86808	268	0.52841	0.99848	1	146	0
DGCR14	0.5197	4.9673e-06	5e-06	245	1	-0.8609	269	0.70519	1	1	218	0
BNIP1	0.94591	4.9673e-06	5e-06	334	0	-0.8553	270	0.52262	0.99848	1	143	0
GTF3C1	0.57222	4.9673e-06	5e-06	253	2	-0.85217	271	0.73162	1	1	232	0
PC	0.86365	4.9673e-06	5e-06	307	1	-0.84557	272	0.84264	1	1	284	0
ZEB1	0.90847	4.9673e-06	5e-06	319	1	-0.84493	273	0.86136	1	1	298	0
PPTC7	0.93328	4.9673e-06	5e-06	328	1	-0.84419	274	0.65914	0.99999	1	196	0
TYMS	0.83094	4.9673e-06	5e-06	298	1	-0.84333	275	0.51087	0.99848	1	138	0
COPG1	0.3376	4.9673e-06	5e-06	215	1	-0.83437	276	0.22504	0.86967	1	48	0
POC1A	0.76999	4.9673e-06	5e-06	286	1	-0.82769	277	0.46011	0.99665	1	121	0
SLBP	0.84009	4.9673e-06	5e-06	300	1	-0.81922	278	0.42915	0.99228	1	112	0
AATF	0.61103	4.9673e-06	5e-06	263	2	-0.81902	279	0.66026	0.99999	1	197	0
KIAA1429	0.78636	4.9673e-06	5e-06	289	1	-0.81617	280	0.6725	0.99999	1	204	0
CSHL1	0.62744	4.9673e-06	5e-06	267	2	-0.80669	281	0.7911	1	1	259	0
TMEM41B	0.46962	4.9673e-06	5e-06	236	2	-0.8046	282	0.14016	0.74823	1	29	0
USP37	0.89884	4.9673e-06	5e-06	317	1	-0.79639	283	0.89562	1	1	316	0
SETD8	0.82621	4.9673e-06	5e-06	295	1	-0.79291	284	0.23338	0.86968	1	51	0
CCDC174	0.91972	4.9673e-06	5e-06	323	1	-0.7903	285	0.84073	1	1	283	0
C1orf131	0.40721	4.9673e-06	5e-06	227	2	-0.78835	286	0.57953	0.99969	1	165	0
TTF1	0.49437	4.9673e-06	5e-06	242	1	-0.78813	287	0.24165	0.88108	1	54	0
RCE1	0.96015	4.9673e-06	5e-06	340	0	-0.78612	288	0.59646	0.9997	1	171	0
TFIP11	0.35782	4.9673e-06	5e-06	222	1	-0.78432	289	0.5197	0.99848	1	142	0
AKIRIN2	0.64057	4.9673e-06	5e-06	271	2	-0.77987	290	0.775	1	1	247	0
NUBP2	0.89422	4.9673e-06	5e-06	315	1	-0.77385	291	0.053363	0.24238	1	11	0
SPCS3	0.67408	4.9673e-06	5e-06	277	2	-0.77279	292	0.046048	0.19841	1	9	0
YY1	0.85788	4.9673e-06	5e-06	305	1	-0.76621	293	0.59001	0.9997	1	168	0
VPS72	0.79652	4.9673e-06	5e-06	290	1	-0.74849	294	0.038691	0.15234	1	7	1
PTPN23	0.63597	4.9673e-06	5e-06	269	1	-0.74572	295	0.50641	0.99806	1	137	0
BRD4	0.62395	4.9673e-06	5e-06	265	1	-0.74395	296	0.35964	0.96735	1	93	0
BCAS2	0.92673	4.9673e-06	5e-06	325	1	-0.7376	297	0.62758	0.99993	1	184	0
DDX52	0.10573	4.9673e-06	5e-06	121	2	-0.73374	298	0.28593	0.91907	1	66	0
ADAR	0.95877	4.9673e-06	5e-06	339	0	-0.72398	299	0.78073	1	1	252	0
RTF1	0.86759	4.9673e-06	5e-06	310	1	-0.72008	300	0.33946	0.95842	1	85	0
RNF40	0.87836	4.9673e-06	5e-06	313	1	-0.71838	301	0.60914	0.99982	1	176	0
BRF1	0.93969	4.9673e-06	5e-06	331	0	-0.70937	302	0.096371	0.53282	1	19	0
TCEB1	0.91779	4.9673e-06	5e-06	321	1	-0.70524	303	0.56207	0.9988	1	161	0
MCRS1	0.97137	4.9673e-06	5e-06	349	0	-0.70421	304	0.060635	0.24239	1	13	0
ACTR5	0.9655	4.9673e-06	5e-06	343	0	-0.70101	305	0.29767	0.94126	1	69	0
RRP15	0.85492	4.9673e-06	5e-06	304	1	-0.70036	306	0.25392	0.89183	1	58	0
CHMP4B	0.44561	4.9673e-06	5e-06	233	2	-0.69522	307	0.1379	0.74822	1	28	0
CHD8	0.81788	4.9673e-06	5e-06	294	1	-0.69061	308	0.80484	1	1	265	0
GTF2H3	0.61039	4.9673e-06	5e-06	262	1	-0.68763	309	0.62395	0.99993	1	183	0
KIAA0100	0.86194	4.9673e-06	5e-06	306	1	-0.68745	310	0.6714	0.99999	1	203	0
ARHGAP29	0.85313	4.9673e-06	5e-06	302	1	-0.67621	311	0.28001	0.91906	1	64	0
CLSPN	0.8464	4.9673e-06	5e-06	301	1	-0.66368	312	0.66698	0.99999	1	202	0
RNF25	0.86703	4.9673e-06	5e-06	309	1	-0.65978	313	0.70822	1	1	219	0
NAA30	0.96882	4.9673e-06	5e-06	346	0	-0.64817	314	0.51677	0.99848	1	140	0
RBBP8	0.94759	4.9673e-06	5e-06	335	0	-0.63035	315	0.74822	1	1	238	0
AP2M1	0.92709	4.9673e-06	5e-06	326	1	-0.62813	316	0.51824	0.99848	1	141	0
FCHO2	0.93394	4.9673e-06	5e-06	329	1	-0.62735	317	0.37758	0.97824	1	97	0
RPS21	0.97084	4.9673e-06	5e-06	348	0	-0.62602	318	0.3376	0.95842	1	84	0
NIPBL	0.61516	4.9673e-06	5e-06	264	2	-0.61909	319	0.11038	0.58941	1	23	0
UBE2H	0.65459	4.9673e-06	5e-06	274	1	-0.61887	320	0.5782	0.99969	1	164	0
EIF5B	0.9433	4.9673e-06	5e-06	333	0	-0.61172	321	0.63715	0.99997	1	187	0
GNAI2	0.96806	4.9673e-06	5e-06	344	0	-0.60124	322	0.26404	0.91059	1	61	0
DCP2	0.95616	4.9673e-06	5e-06	338	0	-0.58847	323	0.19963	0.84485	1	42	0
GLE1	0.88749	4.9673e-06	5e-06	314	1	-0.58584	324	0.60284	0.99981	1	173	0
HEXIM1	0.7446	4.9673e-06	5e-06	284	1	-0.58276	325	0.52407	0.99848	1	144	0
SLC39A1	0.98533	4.9673e-06	5e-06	351	0	-0.57295	326	0.098716	0.53283	1	20	0
C2orf44	0.99314	0.052737	0.056006	355	0	-0.56615	327	0.43081	0.99229	1	113	0
SLC7A5	0.96863	4.9673e-06	5e-06	345	0	-0.56128	328	0.47119	0.99777	1	125	0
ANKRD52	0.77747	4.9673e-06	5e-06	288	1	-0.55862	329	0.18886	0.81638	1	40	0
TMEM41A	0.94	4.9673e-06	5e-06	332	0	-0.55737	330	0.3169	0.95296	1	75	0
AFG3L2	0.30541	4.9673e-06	5e-06	204	1	-0.55404	331	0.58741	0.99969	1	167	0
TTK	0.71421	4.9673e-06	5e-06	282	1	-0.54336	332	0.27604	0.9106	1	63	0
MAU2	0.63856	4.9673e-06	5e-06	270	2	-0.53634	333	0.15365	0.76664	1	33	0
DCAF13	0.02385	4.9673e-06	5e-06	51	1	-0.518	334	0.65345	0.99998	1	193	0
TOP1MT	0.99076	4.9673e-06	5e-06	353	0	-0.51069	335	0.45531	0.99576	1	120	0
MRPL52	0.86591	4.9673e-06	5e-06	308	1	-0.49089	336	0.16034	0.76665	1	34	0
FTH1	0.97908	4.9673e-06	5e-06	350	0	-0.48256	337	0.47745	0.99778	1	128	0
TFRC	0.8296	4.9673e-06	5e-06	297	1	-0.48199	338	0.55244	0.9988	1	157	0
GRWD1	0.96448	4.9673e-06	5e-06	342	0	-0.45047	339	0.42247	0.99228	1	108	0
NUP160	0.9692	4.9673e-06	5e-06	347	0	-0.44342	340	0.27006	0.9106	1	62	0
PGP	0.99569	0.19806	0.206277	359	0	-0.43977	341	0.29377	0.94126	1	67	0
PSMC1	0.89839	4.9673e-06	5e-06	316	1	-0.4361	342	0.29961	0.94127	1	70	0
LSM11	0.038691	4.9673e-06	5e-06	72	1	-0.41647	343	0.17797	0.78414	1	39	0
PRKRIR	0.75973	4.9673e-06	5e-06	285	1	-0.41345	344	0.57555	0.99959	1	163	0
ACLY	0.9889	4.9673e-06	5e-06	352	0	-0.41209	345	0.33387	0.95841	1	82	0
NCAPH	0.80033	4.9673e-06	5e-06	291	1	-0.40451	346	0.16477	0.76665	1	35	0
TUBB8	0.83293	4.9673e-06	5e-06	299	1	-0.3928	347	0.44398	0.99229	1	117	0
RNF20	0.87035	4.9673e-06	5e-06	311	1	-0.38118	348	0.4191	0.99228	1	107	0
SRCAP	0.92745	4.9673e-06	5e-06	327	1	-0.3729	349	0.34501	0.96302	1	87	0
KRT18	0.89975	4.9673e-06	5e-06	318	1	-0.35455	350	0.25798	0.90154	1	59	0
INTS2	0.17359	4.9673e-06	5e-06	146	1	-0.34369	351	0.35782	0.96735	1	92	0
PSMB1	0.53557	4.9673e-06	5e-06	249	1	-0.3305	352	0.19102	0.81638	1	41	0
CARTPT	0.99929	0.56492	0.578738	368	0	-0.31447	353	0.3207	0.95296	1	77	0
GOT2	0.96406	4.9673e-06	5e-06	341	0	-0.28266	354	0.075054	0.40034	1	14	0
CREM	0.99492	0.19806	0.206277	358	0	-0.23955	355	0.041148	0.15235	1	8	0
CAB39	0.99656	0.19807	0.206277	362	0	-0.22923	356	0.11732	0.64107	1	24	0
SLC1A3	0.99754	0.24259	0.251942	363	0	-0.22747	357	0.23752	0.88107	1	52	0
RNF10	0.9959	0.19807	0.206277	360	0	-0.20575	358	0.30733	0.94753	1	72	0
RHOT1	0.99483	0.19806	0.206277	357	0	-0.18214	359	0.21664	0.85768	1	45	0
KEAP1	0.9992	0.56491	0.578738	367	0	-0.17804	360	0.36866	0.9712	1	95	0
PDCD10	0.95004	4.9673e-06	5e-06	336	0	-0.17638	361	0.20391	0.84486	1	44	0
TP53	0.91383	4.9673e-06	5e-06	320	1	-0.11281	362	0.26202	0.91059	1	60	0
GOT1	0.99852	0.40201	0.414088	366	0	-0.10713	363	0.32448	0.95297	1	78	0
NF2	0.99981	0.84759	0.856679	373	0	-0.054085	364	0.25189	0.89183	1	57	0
FRMD6	0.99784	0.28496	0.294326	365	0	-0.011543	365	0.082201	0.43657	1	16	0
SMOX	0.99967	0.75299	0.765181	370	0	0.0045106	366	0.14917	0.76664	1	31	0
KIRREL	0.99963	0.73372	0.749627	369	0	0.048344	367	0.089307	0.47017	1	18	0
TAOK1	0.99978	0.78835	0.798946	372	0	0.078657	368	0.026335	0.009264	0.582085	6	1
G3BP2	0.99973	0.753	0.765181	371	0	0.10523	369	0.14242	0.74823	1	30	0
E2F7	0.99997	0.95891	0.966598	374	0	0.11138	370	0.01386	0.009254	0.582085	4	1
FRYL	0.99447	0.15209	0.161064	356	0	0.12003	371	0.084574	0.43658	1	17	0
CDS1	0.99773	0.28495	0.294326	364	0	0.12752	372	0.1288	0.72901	1	25	0
CDKN1B	0.99998	0.96821	0.973378	375	0	0.18958	373	0.021359	0.009264	0.582085	5	1
ATXN2L	0.99283	4.9673e-06	5e-06	354	0	0.34213	374	0.0004336	0.0042073	0.528714	3	2
ARNT	0.99594	0.19807	0.206277	361	0	0.86951	375	2.7817e-07	4.9673e-06	0.000936	2	3
CREBBP	1	1	1	376	0	1.7033	376	5.09e-10	4.9673e-06	0.000936	1	4

## Sheet: TPC-1 HPLM ReScreen
id	neg|score	neg|p-value	neg|fdr	neg|rank	neg|goodsgrna	neg|lfc	neg lfc rank	pos|score	pos|p-value	pos|fdr	pos|rank	pos|goodsgrna
TPI1	0.0008712	4.9673e-06	1.8e-05	5	3	-0.88145	1	0.70112	0.9979	1	228	0
WDR1	0.013593	4.9673e-06	1.8e-05	32	3	-0.81428	2	0.82621	0.99986	1	282	0
OXA1L	0.0034521	4.9673e-06	1.8e-05	12	3	-0.79569	3	0.6041	0.98745	1	187	0
MRPL57	0.018648	4.9673e-06	1.8e-05	38	4	-0.71676	4	0.98135	1	1	362	0
FDX1L	0.00064608	4.9673e-06	1.8e-05	2	3	-0.71478	5	0.2478	0.66862	1	61	0
ATG9A	0.0082974	4.9673e-06	1.8e-05	24	3	-0.70893	6	0.90462	0.99999	1	318	0
GATC	0.018864	4.9673e-06	1.8e-05	39	2	-0.70488	7	0.46011	0.95751	1	128	0
ZBTB8OS	0.00033424	4.9673e-06	1.8e-05	1	4	-0.67968	8	0.99967	1	1	376	0
PNKP	0.098716	4.9673e-06	1.8e-05	104	3	-0.67347	9	0.6714	0.9948	1	214	0
DHFR	0.06825	4.9673e-06	1.8e-05	90	3	-0.66496	10	0.85905	0.99995	1	295	0
PSMG3	0.0090116	4.9673e-06	1.8e-05	26	4	-0.66191	11	0.99099	1	1	366	0
MRPL52	0.31364	0.0002732	0.000464	201	2	-0.65436	12	0.70418	0.99834	1	229	0
WWTR1	0.023192	4.9673e-06	1.8e-05	48	3	-0.64938	13	0.11501	0.28426	1	26	0
SCAP	0.033496	4.9673e-06	1.8e-05	62	3	-0.63461	14	0.57154	0.98744	1	168	0
HSPA8	0.0040234	4.9673e-06	1.8e-05	14	3	-0.62865	15	0.71421	0.99834	1	234	0
MYC	0.0028709	4.9673e-06	1.8e-05	9	4	-0.61312	16	0.99713	1	1	372	0
PFDN5	0.011081	4.9673e-06	1.8e-05	30	4	-0.61215	17	0.97866	1	1	360	0
MARS2	0.003216	4.9673e-06	1.8e-05	11	3	-0.61197	18	0.88095	0.99996	1	307	0
RPL34	0.0049514	4.9673e-06	1.8e-05	16	3	-0.60906	19	0.91383	0.99999	1	323	0
FNTA	0.030432	4.9673e-06	1.8e-05	59	4	-0.60732	20	0.96957	1	1	355	0
MAT2A	0.020034	4.9673e-06	1.8e-05	42	3	-0.59877	21	0.697	0.99789	1	225	0
RPS27	0.010953	4.9673e-06	1.8e-05	29	3	-0.59785	22	0.82069	0.99986	1	277	0
PPP1R11	0.021682	4.9673e-06	1.8e-05	46	3	-0.59529	23	0.93622	1	1	339	0
VHL	0.0086362	4.9673e-06	1.8e-05	25	2	-0.58793	24	0.28986	0.7524	1	74	0
CCT7	0.0052887	4.9673e-06	1.8e-05	17	3	-0.58569	25	0.50939	0.97388	1	144	0
GAPDH	0.006196	4.9673e-06	1.8e-05	19	3	-0.58481	26	0.9253	1	1	331	0
SETD1A	0.030138	4.9673e-06	1.8e-05	58	3	-0.58194	27	0.55796	0.98262	1	163	0
UTP3	0.00077552	4.9673e-06	1.8e-05	3	4	-0.57976	28	0.99922	1	1	375	0
PREB	0.021871	4.9673e-06	1.8e-05	47	3	-0.57887	29	0.79031	0.9996	1	263	0
NHLRC2	0.024903	4.9673e-06	1.8e-05	51	3	-0.57736	30	0.84578	0.99993	1	291	0
ATP5I	0.021472	4.9673e-06	1.8e-05	45	4	-0.57438	31	0.97838	1	1	359	0
GMPPB	0.014071	4.9673e-06	1.8e-05	33	3	-0.56974	32	0.91098	0.99999	1	322	0
EGLN1	0.16276	2.4836e-05	6.2e-05	140	3	-0.56893	33	0.60157	0.98745	1	185	0
SCD	0.0023458	4.9673e-06	1.8e-05	8	4	-0.56737	34	0.99765	1	1	373	0
TXNRD1	0.019414	4.9673e-06	1.8e-05	40	4	-0.56703	35	0.96126	1	1	350	0
GPI	0.1492	2.4836e-05	6.2e-05	129	3	-0.5667	36	0.89655	0.99999	1	313	0
CBWD5	0.014906	4.9673e-06	1.8e-05	35	4	-0.56598	37	0.96427	1	1	352	0
CDK6	0.040686	4.9673e-06	1.8e-05	71	3	-0.56284	38	0.89422	0.99999	1	311	0
BRCA1	0.010536	4.9673e-06	1.8e-05	28	3	-0.56193	39	0.85071	0.99995	1	294	0
EMC3	0.0063181	4.9673e-06	1.8e-05	20	4	-0.55052	40	0.98331	1	1	365	0
PPP6C	0.035939	4.9673e-06	1.8e-05	64	4	-0.54656	41	0.96406	1	1	351	0
ZNHIT3	0.11088	1.4902e-05	4.5e-05	112	3	-0.54466	42	0.80484	0.99973	1	270	0
RAD1	0.00086127	4.9673e-06	1.8e-05	4	4	-0.53509	43	0.99914	1	1	374	0
PGGT1B	0.02546	4.9673e-06	1.8e-05	52	3	-0.53275	44	0.14242	0.36438	1	35	0
MSTO1	0.0069861	4.9673e-06	1.8e-05	22	4	-0.52597	45	0.99301	1	1	369	0
RPL35A	0.038691	4.9673e-06	1.8e-05	69	3	-0.5239	46	0.91423	0.99999	1	324	0
PSTK	0.056428	4.9673e-06	1.8e-05	84	2	-0.51992	47	0.91583	0.99999	1	326	0
RPS23	0.0054315	4.9673e-06	1.8e-05	18	3	-0.51987	48	0.38991	0.85994	1	108	0
RPL28	0.0021814	4.9673e-06	1.8e-05	7	2	-0.51972	49	0.3758	0.84715	1	101	0
FEN1	0.0031539	4.9673e-06	1.8e-05	10	4	-0.51855	50	0.99191	1	1	368	0
DDX27	0.089389	4.9673e-06	1.8e-05	98	3	-0.51721	51	0.82278	0.99986	1	279	0
TACC3	0.0078345	4.9673e-06	1.8e-05	23	3	-0.51653	52	0.33013	0.78858	1	87	0
ANKRD49	0.065314	4.9673e-06	1.8e-05	88	3	-0.51365	53	0.81929	0.99986	1	276	0
RBX1	0.031186	4.9673e-06	1.8e-05	61	4	-0.51216	54	0.96468	1	1	353	0
LAMTOR2	0.068335	4.9673e-06	1.8e-05	91	2	-0.50285	55	0.68969	0.9973	1	221	0
ACTR1A	0.023847	4.9673e-06	1.8e-05	49	4	-0.50186	56	0.97615	1	1	358	0
CENPM	0.10079	1.4902e-05	4.5e-05	106	3	-0.50083	57	0.46488	0.95751	1	131	0
EIF2B5	0.019814	4.9673e-06	1.8e-05	41	3	-0.50077	58	0.8698	0.99996	1	301	0
HAUS4	0.029538	4.9673e-06	1.8e-05	55	3	-0.50034	59	0.89041	0.99998	1	309	0
MMS19	0.037671	4.9673e-06	1.8e-05	67	3	-0.49986	60	0.91015	0.99999	1	321	0
ATP1A1	0.046566	4.9673e-06	1.8e-05	76	4	-0.49549	61	0.95343	1	1	346	0
YY1	0.17913	2.4836e-05	6.2e-05	150	3	-0.48395	62	0.84201	0.99992	1	289	0
UTP6	0.15186	2.4836e-05	6.2e-05	132	3	-0.48032	63	0.24165	0.66862	1	60	0
HDAC3	0.16256	2.4836e-05	6.2e-05	139	3	-0.4799	64	0.52841	0.98005	1	151	0
ACTB	0.12821	1.4902e-05	4.5e-05	121	3	-0.47943	65	0.9002	0.99999	1	316	0
MRPL4	0.20092	3.4771e-05	7.7e-05	159	3	-0.47231	66	0.58085	0.98744	1	173	0
CCT6A	0.0063938	4.9673e-06	1.8e-05	21	4	-0.47128	67	0.99361	1	1	370	0
KAT5	0.03002	4.9673e-06	1.8e-05	57	2	-0.46831	68	0.73444	0.99835	1	241	0
USP39	0.09503	4.9673e-06	1.8e-05	102	3	-0.46672	69	0.80033	0.99972	1	268	0
SON	0.1073	1.4902e-05	4.5e-05	110	3	-0.46573	70	0.45851	0.95751	1	127	0
ATP5D	0.20177	3.4771e-05	7.7e-05	161	2	-0.46563	71	0.79421	0.99972	1	265	0
DHX38	0.14748	2.4836e-05	6.2e-05	128	3	-0.46553	72	0.27405	0.7122	1	68	0
POLD2	0.014395	4.9673e-06	1.8e-05	34	3	-0.4649	73	0.60788	0.98745	1	189	0
NSL1	0.12639	1.4902e-05	4.5e-05	120	3	-0.45823	74	0.80409	0.99973	1	269	0
FNTB	0.031177	4.9673e-06	1.8e-05	60	4	-0.45799	75	0.96882	1	1	354	0
SOD2	0.153	2.4836e-05	6.2e-05	133	3	-0.45286	76	0.86021	0.99995	1	296	0
COPE	0.018521	4.9673e-06	1.8e-05	37	4	-0.43941	77	0.98148	1	1	363	0
ZNRD1	0.09096	4.9673e-06	1.8e-05	99	3	-0.43922	78	0.70822	0.99834	1	230	0
BNIP1	0.45593	0.00028313	0.000464	228	2	-0.43614	79	0.21029	0.56295	1	52	0
CTC1	0.21509	3.4771e-05	7.7e-05	166	3	-0.43597	80	0.27604	0.7122	1	69	0
NUP160	0.11519	1.4902e-05	4.5e-05	115	3	-0.43265	81	0.83293	0.99987	1	285	0
SREBF1	0.41435	0.00028313	0.000464	221	2	-0.43257	82	0.68439	0.99649	1	220	0
GFER	0.56902	0.0013362	0.001923	255	2	-0.43192	83	0.55105	0.98261	1	159	0
AKIRIN2	0.027127	4.9673e-06	1.8e-05	54	4	-0.43156	84	0.9375	1	1	340	0
USP37	0.15522	2.4836e-05	6.2e-05	135	3	-0.42931	85	0.89747	0.99999	1	314	0
SLMO2	0.098728	4.9673e-06	1.8e-05	105	2	-0.42709	86	0.57288	0.98744	1	169	0
SLC35B1	0.02657	4.9673e-06	1.8e-05	53	4	-0.42686	87	0.97343	1	1	357	0
NDUFAB1	0.14201	2.4836e-05	6.2e-05	125	3	-0.42662	88	0.92955	1	1	335	0
POP1	0.02385	4.9673e-06	1.8e-05	50	3	-0.42348	89	0.61288	0.98918	1	191	0
GTF2H3	0.2017	3.4771e-05	7.7e-05	160	3	-0.42269	90	0.79958	0.99972	1	267	0
NAA30	0.22398	3.4771e-05	7.7e-05	171	3	-0.42264	91	0.45691	0.95751	1	126	0
POLR3E	0.04837	4.9673e-06	1.8e-05	78	4	-0.42259	92	0.95163	1	1	345	0
MRPS18C	0.28092	0.00010431	0.000201	191	3	-0.42064	93	0.56614	0.98528	1	166	0
CNOT1	0.047209	4.9673e-06	1.8e-05	77	3	-0.41011	94	0.6003	0.98745	1	184	0
RPS5	0.10677	1.4902e-05	4.5e-05	109	2	-0.41009	95	0.48673	0.9666	1	136	0
EAF1	0.045857	4.9673e-06	1.8e-05	75	3	-0.40933	96	0.75886	0.99923	1	249	0
ANAPC1	0.17622	2.4836e-05	6.2e-05	148	3	-0.40721	97	0.69389	0.99731	1	223	0
ATP5B	0.234	9.4378e-05	0.000189	177	3	-0.40592	98	0.66139	0.99479	1	211	0
RPSA	0.1776	2.4836e-05	6.2e-05	149	3	-0.40505	99	0.29377	0.75241	1	76	0
FPGS	0.060062	4.9673e-06	1.8e-05	85	3	-0.4006	100	0.59518	0.98745	1	181	0
RNF40	0.2289	9.4378e-05	0.000189	172	3	-0.40011	101	0.82825	0.99987	1	284	0
GOSR2	0.17191	2.4836e-05	6.2e-05	145	3	-0.40001	102	0.92885	1	1	334	0
RRS1	0.021359	4.9673e-06	1.8e-05	44	2	-0.39478	103	0.55521	0.98261	1	161	0
RPS26	0.001266	4.9673e-06	1.8e-05	6	4	-0.39427	104	0.99164	1	1	367	0
HNRNPC	0.009752	4.9673e-06	1.8e-05	27	4	-0.39314	105	0.95784	1	1	348	0
ALYREF	0.23818	9.4378e-05	0.000189	178	2	-0.39252	106	0.54266	0.98006	1	156	0
MED28	0.55521	0.0013362	0.001923	251	1	-0.38847	107	0.52116	0.97734	1	148	0
MVD	0.20025	3.4771e-05	7.7e-05	158	2	-0.38172	108	0.26605	0.69136	1	65	0
TIMM13	0.69389	0.009105	0.011379	290	1	-0.38152	109	0.73724	0.99835	1	244	0
C12orf45	0.16625	2.4836e-05	6.2e-05	141	3	-0.3804	110	0.34685	0.81953	1	93	0
GAR1	0.076059	4.9673e-06	1.8e-05	93	3	-0.37869	111	0.81859	0.99986	1	275	0
EIF6	0.0037945	4.9673e-06	1.8e-05	13	3	-0.37853	112	0.65573	0.99365	1	207	0
TEX10	0.0040568	4.9673e-06	1.8e-05	15	4	-0.3748	113	0.99594	1	1	371	0
TAF1D	0.31475	0.0002732	0.000464	202	2	-0.37337	114	0.67468	0.9948	1	217	0
CCNL1	0.36935	0.0002732	0.000464	211	2	-0.37041	115	0.64187	0.99088	1	204	0
TWISTNB	0.18575	3.4771e-05	7.7e-05	151	3	-0.37025	116	0.8752	0.99996	1	305	0
OSBP	0.31917	0.0002732	0.000464	204	2	-0.36864	117	0.91779	1	1	328	0
DDX20	0.21338	3.4771e-05	7.7e-05	163	3	-0.36755	118	0.52696	0.98005	1	150	0
NUP155	0.036229	4.9673e-06	1.8e-05	65	4	-0.36727	119	0.94731	1	1	343	0
MRPL20	0.2226	3.4771e-05	7.7e-05	169	2	-0.36713	120	0.76999	0.99924	1	252	0
DIMT1	0.14266	2.4836e-05	6.2e-05	126	3	-0.36421	121	0.71619	0.99834	1	235	0
CLSPN	0.079823	4.9673e-06	1.8e-05	94	3	-0.36043	122	0.87035	0.99996	1	302	0
KIAA1429	0.017161	4.9673e-06	1.8e-05	36	4	-0.35772	123	0.98284	1	1	364	0
EIF2S2	0.064935	4.9673e-06	1.8e-05	87	2	-0.3576	124	0.90847	0.99999	1	320	0
PHB2	0.11404	1.4902e-05	4.5e-05	113	3	-0.35441	125	0.5861	0.98744	1	176	0
LSM5	0.072663	4.9673e-06	1.8e-05	92	3	-0.35438	126	0.84703	0.99993	1	292	0
CCT5	0.44471	0.00028313	0.000464	226	2	-0.35307	127	0.89137	0.99998	1	310	0
SMC5	0.26215	9.4378e-05	0.000189	188	3	-0.35272	128	0.80999	0.99973	1	272	0
CTU1	0.64069	0.0042768	0.005618	273	1	-0.35249	129	0.47276	0.9622	1	132	0
TUBD1	0.094516	4.9673e-06	1.8e-05	101	3	-0.35095	130	0.37935	0.85993	1	102	0
NUFIP1	0.68464	0.009105	0.011379	288	2	-0.35	131	0.16256	0.36439	1	41	0
MCM3	0.054094	4.9673e-06	1.8e-05	82	4	-0.34989	132	0.94591	1	1	341	0
NCAPH	0.48496	0.0013263	0.001923	237	2	-0.34969	133	0.90287	0.99999	1	317	0
UBE2N	0.10805	1.4902e-05	4.5e-05	111	2	-0.34838	134	0.7725	0.99959	1	253	0
AP2M1	0.1433	2.4836e-05	6.2e-05	127	3	-0.34508	135	0.78154	0.99959	1	259	0
NOM1	0.04262	4.9673e-06	1.8e-05	72	2	-0.34408	136	0.67577	0.9948	1	218	0
CHMP3	0.25083	9.4378e-05	0.000189	183	3	-0.34401	137	0.71023	0.99834	1	231	0
IKBKAP	0.12101	1.4902e-05	4.5e-05	116	3	-0.34376	138	0.71717	0.99834	1	236	0
ABCF1	0.39688	0.00028313	0.000464	215	1	-0.34362	139	0.25595	0.66863	1	62	0
NDC1	0.052132	4.9673e-06	1.8e-05	80	4	-0.3418	140	0.94787	1	1	344	0
GLTSCR2	0.44584	0.00028313	0.000464	227	2	-0.33902	141	0.7391	0.99835	1	245	0
RHOT1	0.22316	3.4771e-05	7.7e-05	170	3	-0.33818	142	0.87467	0.99996	1	304	0
AP2S1	0.658	0.0042768	0.005618	279	1	-0.33741	143	0.82689	0.99986	1	283	0
NUP35	0.18949	3.4771e-05	7.7e-05	153	3	-0.33595	144	0.9346	1	1	337	0
SDAD1	0.24144	9.4378e-05	0.000189	180	3	-0.33561	145	0.83622	0.99987	1	287	0
HAUS8	0.40647	0.00028313	0.000464	217	2	-0.33278	146	0.81788	0.99986	1	274	0
RBBP4	0.17359	2.4836e-05	6.2e-05	146	3	-0.33276	147	0.81144	0.99973	1	273	0
HYPK	0.037347	4.9673e-06	1.8e-05	66	3	-0.33089	148	0.86703	0.99996	1	299	0
GNL3	0.051441	4.9673e-06	1.8e-05	79	2	-0.32977	149	0.86194	0.99995	1	297	0
IPO13	0.053247	4.9673e-06	1.8e-05	81	4	-0.32885	150	0.94675	1	1	342	0
ERCC3	0.43907	0.00028313	0.000464	225	2	-0.32858	151	0.75623	0.99923	1	248	0
USP9X	0.25293	9.4378e-05	0.000189	185	2	-0.32819	152	0.23545	0.61909	1	59	0
ZNHIT6	0.0297	4.9673e-06	1.8e-05	56	4	-0.32819	153	0.9703	1	1	356	0
VBP1	0.40985	0.00028313	0.000464	219	2	-0.32644	154	0.20177	0.56294	1	49	0
TTK	0.65255	0.0042768	0.005618	278	2	-0.3261	155	0.19533	0.53335	1	47	0
TUBB8	0.34696	0.0002732	0.000464	208	2	-0.32505	156	0.86308	0.99995	1	298	0
SARS2	0.033763	4.9673e-06	1.8e-05	63	3	-0.32499	157	0.8865	0.99997	1	308	0
KIAA0100	0.33136	0.0002732	0.000464	205	2	-0.32427	158	0.36866	0.84714	1	98	0
DCAF13	0.091666	4.9673e-06	1.8e-05	100	3	-0.32395	159	0.5926	0.98745	1	179	0
MLST8	0.4727	0.0013263	0.001923	232	2	-0.32335	160	0.61412	0.98918	1	192	0
BCAS2	0.30871	0.0002732	0.000464	197	3	-0.32077	161	0.6725	0.9948	1	215	0
PSMB7	0.096371	4.9673e-06	1.8e-05	103	2	-0.3195	162	0.79344	0.99972	1	264	0
SRP9	0.68082	0.0042768	0.005618	287	2	-0.31676	163	0.72205	0.99834	1	238	0
H3F3A	0.1913	3.4771e-05	7.7e-05	154	2	-0.31654	164	0.4617	0.95751	1	129	0
PDPK1	0.3758	0.0002732	0.000464	212	1	-0.31628	165	0.82139	0.99986	1	278	0
ANAPC5	0.037941	4.9673e-06	1.8e-05	68	3	-0.31564	166	0.78235	0.9996	1	260	0
UBIAD1	0.81788	0.0091149	0.011379	299	1	-0.31515	167	0.56207	0.98262	1	165	0
ELP4	0.57115	0.0013362	0.001923	258	2	-0.31325	168	0.72495	0.99835	1	239	0
DIS3	0.011351	4.9673e-06	1.8e-05	31	3	-0.31163	169	0.32259	0.78857	1	84	0
EIF2B4	0.16034	2.4836e-05	6.2e-05	137	2	-0.30911	170	0.32825	0.78858	1	86	0
STX18	0.51592	0.0013263	0.001923	242	2	-0.30819	171	0.64069	0.99088	1	203	0
SLBP	0.93782	0.15066	0.161833	335	0	-0.30815	172	0.23338	0.61909	1	58	0
EXOSC9	0.1532	2.4836e-05	6.2e-05	134	3	-0.30643	173	0.83491	0.99987	1	286	0
BRAT1	0.34584	0.0002732	0.000464	207	2	-0.30592	174	0.19963	0.56294	1	48	0
BANP	0.86079	0.055489	0.066004	306	1	-0.3058	175	0.72973	0.99835	1	240	0
DGCR14	0.21911	3.4771e-05	7.7e-05	168	3	-0.30421	176	0.91543	0.99999	1	325	0
HAUS3	0.13376	1.4902e-05	4.5e-05	124	3	-0.30367	177	0.87252	0.99996	1	303	0
TIPIN	0.21429	3.4771e-05	7.7e-05	164	3	-0.30123	178	0.83945	0.99987	1	288	0
ZNF207	0.20481	3.4771e-05	7.7e-05	162	3	-0.30003	179	0.77992	0.99959	1	258	0
TMEM30A	0.19533	3.4771e-05	7.7e-05	156	3	-0.29969	180	0.71123	0.99834	1	232	0
COPS4	0.16	2.4836e-05	6.2e-05	136	3	-0.29929	181	0.87784	0.99996	1	306	0
ACTR10	0.19478	3.4771e-05	7.7e-05	155	3	-0.2965	182	0.89609	0.99999	1	312	0
TBCE	0.10348	1.4902e-05	4.5e-05	107	3	-0.29492	183	0.78396	0.9996	1	262	0
DDX6	0.23221	9.4378e-05	0.000189	176	3	-0.29474	184	0.13108	0.28427	1	32	0
MIPEP	0.57328	0.0013362	0.001923	259	2	-0.2946	185	0.35418	0.81954	1	95	0
SUPT16H	0.06367	4.9673e-06	1.8e-05	86	3	-0.29281	186	0.92989	1	1	336	0
ORC1	0.21645	3.4771e-05	7.7e-05	167	2	-0.29134	187	0.69493	0.99731	1	224	0
EMC7	0.17567	2.4836e-05	6.2e-05	147	3	-0.29128	188	0.11732	0.28426	1	27	0
VPS72	0.64158	0.0042768	0.005618	274	2	-0.29001	189	0.76232	0.99924	1	251	0
TMEM199	0.65847	0.0042768	0.005618	280	2	-0.28877	190	0.59774	0.98745	1	183	0
IGBP1	0.12398	1.4902e-05	4.5e-05	117	3	-0.28756	191	0.93493	1	1	338	0
ACLY	0.60793	0.0042669	0.005618	267	2	-0.28727	192	0.92236	1	1	330	0
PSMC4	0.13314	1.4902e-05	4.5e-05	122	3	-0.2827	193	0.92048	1	1	329	0
CHMP4B	0.41097	0.00028313	0.000464	220	2	-0.28217	194	0.62999	0.98919	1	198	0
PRKRIR	0.040079	4.9673e-06	1.8e-05	70	4	-0.28107	195	0.95992	1	1	349	0
DDX18	0.27191	0.00010431	0.000201	189	3	-0.27702	196	0.9174	1	1	327	0
CFLAR	0.089307	4.9673e-06	1.8e-05	97	1	-0.27486	197	0.30541	0.7703	1	79	0
NAPA	0.62336	0.0042669	0.005618	269	2	-0.27392	198	0.658	0.99479	1	208	0
UTP11L	0.19925	3.4771e-05	7.7e-05	157	2	-0.27363	199	0.61783	0.98918	1	193	0
MOB4	0.11501	1.4902e-05	4.5e-05	114	1	-0.27277	200	0.18669	0.5024	1	45	0
UBE2H	0.24575	9.4378e-05	0.000189	181	1	-0.27259	201	0.63478	0.99087	1	200	0
LARP1	0.12579	1.4902e-05	4.5e-05	119	3	-0.27236	202	0.42247	0.91124	1	118	0
KANSL1	0.42335	0.00028313	0.000464	224	2	-0.26881	203	0.84888	0.99995	1	293	0
ATP6V1D	0.10514	1.4902e-05	4.5e-05	108	2	-0.26875	204	0.36145	0.81954	1	97	0
C7orf26	0.46488	0.0013263	0.001923	231	2	-0.26818	205	0.7527	0.99923	1	247	0
ACTG1	0.56261	0.0013362	0.001923	253	2	-0.26674	206	0.27803	0.71221	1	70	0
CEP192	0.91856	0.10336	0.116671	325	1	-0.26483	207	0.64885	0.99218	1	206	0
TADA2A	0.5923	0.0042669	0.005618	265	2	-0.2641	208	0.63597	0.99087	1	201	0
PKMYT1	0.93328	0.10336	0.116671	333	1	-0.26344	209	0.5079	0.97388	1	143	0
[truncated: 167 more rows]

## Sheet: UTSW-354 HPLM ReScreen
id	neg|score	neg|p-value	neg|fdr	neg|rank	neg|goodsgrna	neg|lfc	neg lfc rank	pos|score	pos|p-value	pos|fdr	pos|rank	pos|goodsgrna
[truncated: 376 more rows]

[truncated: 5 more sheets: NCI-237 RPMI ReScreen, TPC-1 RPMI ReScreen, UTSW-354 RPMI ReScreen, HPLM ReScreen Depletion Scores, RPMI ReScreen Depletion Scores]
